# Supplementary material for: An archaeal compound as a driver of Parkinson’s disease pathogenesis
Source: Research Square preprint supplement (doi:10.21203/rs.3.rs-1827631/v1), 2022-07-26
Supplement: Supplementary file 1 [file 6fd365e7b86667336c3bfa32.xlsx]

## Sheet: STable1
Supplementary Table 1. Summary statistics for MG (metagenomic) and MT (metatranscriptomic) sequence data.
Measure	Mean	Sd	Min	1st quartile	Median	3rd quartile	Max
mg_raw_reads_1	1.04906e+08	2.37195e+07	29219968	91765934	102648624	115005828	185866040
mg_raw_reads_2	1.04906e+08	2.37195e+07	29219968	91765934	102648624	115005828	185866040
mg_trimmed_reads_1	1.00637e+08	2.39463e+07	18801304	87474424	97610964	111034276	181312924
mg_trimmed_reads_2	1.00637e+08	2.39463e+07	18801304	87474424	97610964	111034276	181312924
mg_trimmed_reads_se	809422	823285	156888	444634	566256	867730	7129224
mg_final_reads_1	1.04049e+08	2.34883e+07	29048816	91237326	101392348	114000564	184921584
mg_final_reads_2	1.04049e+08	2.34883e+07	29048816	91237326	101392348	114000564	184921584
mg_final_reads_se	823746	833743	157064	451676	574960	876258	7140248
mg_total_reads	6.20816e+08	1.40915e+08	173236464	538539580	601051820	681092136	1105942108
mt_raw_reads_1	9.91188e+07	1.84391e+07	33056012	86928350	101336532	111298090	153980820
mt_raw_reads_2	9.91188e+07	1.84391e+07	33056012	86928350	101336532	111298090	153980820
mt_trimmed_reads_1	8.5078e+07	1.64737e+07	22391328	74455156	84907172	95990104	135400136
mt_trimmed_reads_2	8.5078e+07	1.64737e+07	22391328	74455156	84907172	95990104	135400136
mt_trimmed_reads_se	1.39887e+07	1.6324e+07	0	4	12	28846184	50099784
mt_trimmed_reads_rna_filtered_1	7.37451e+07	2.37648e+07	5032088	65907946	77359404	89512408	120049448
mt_trimmed_reads_rna_filtered_2	7.37451e+07	2.37648e+07	5032088	65907946	77359404	89512408	120049448
mt_trimmed_reads_rna_filtered_se	1.01485e+07	1.236e+07	0	0	4	22659438	35183136
mt_final_reads_1	6.19696e+07	2.91084e+07	2301948	40665742	61506500	86438334	119862480
mt_final_reads_2	6.19696e+07	2.91084e+07	2301948	40665742	61506500	86438334	119862480
mt_final_reads_se	1.00369e+07	1.2249e+07	0	0	4	22514326	34967396
mt_total_reads	6.73997e+08	1.3408e+08	219357296	615878946	679996428	761836892	970638972
contigs	336153	100947	126527	276160	333479	395812	607344
mean_contig_length	1255.46	157.098	921	1146.5	1236	1356	1799
median_contig_length	531.927	19.7817	482	520	529	544	600
mean_contig_gc	48.8293	1.29125	45	48	49	50	52
median_contig_gc	48.3171	1.74768	44	47	48	49	53
contigs_with_mg_coverage	324883	98406.4	120188	269690	317591	381480	576362
mean_mg_contig_coverage_depth	9.85285	4.02038	3.19	7.65	8.83	10.58	30.84
median_mg_contig_coverage_depth	3.1874	0.326857	2.32	2.98	3.17	3.35	4.39
mean_mg_read_contig_mappings	151.317	64.1273	27	115	139	176.5	357
mg_median_mg_read_contig_mappings	14.3984	2.72132	7	13	14	16	24
mean_mg_read_contig_coverage_breadth	0.901041	0.0649233	0.625	0.901	0.922	0.9375	0.973
median_mg_read_contig_coverage_breadth	0.993033	0.0277178	0.824	1	1	1	1
mg_read_recruitment_assembly	0.947398	0.0226204	0.793	0.94	0.949	0.959	0.98
contigs_with_mt_coverage	184843	61965.4	56836	141691	185451	223778	338376
mean_mt_contig_coverage_depth	43.3964	28.7774	3.09	20.89	39.52	59.535	134.33
median_mt_contig_coverage_depth	1.73065	1.11609	0.34	1.03	1.52	1.975	7.1
mean_mt_read_contig_mappings	117.285	79.7176	3	73	99	153	535
median_mt_read_contig_mappings	1.87805	1.55545	0	1	2	2	10
mean_mt_read_contig_coverage_breadth	0.314593	0.0871031	0.052	0.2715	0.319	0.367	0.511
median_mt_read_contig_coverage_breadth	0.178163	0.144511	0	0.0515	0.172	0.282	0.57
mt_read_recruitment_assembly	0.960967	0.0191101	0.841	0.955	0.964	0.9725	0.986
genes	630202	164561	252032	533690	629600	738164	1063691
mean_gene_length	580.35	30.3901	499	559	580	603	668
median_gene_length	424.22	20.6487	378	411	423	436.5	495
mean_mg_gene_coverage_depth	13.2011	4.49829	1.58	10.68	12.26	14.805	30.27
median_mg_gene_coverage_depth	4.43073	0.914925	0	3.89	4.3	4.87	6.76
mean_mt_gene_coverage_depth	11.7411	7.43106	0.68	6.385	11.21	15.215	40.86
median_mt_gene_coverage_depth	0.323821	0.372936	0	0	0.24	0.51	1.78
bins	71.9431	16.5941	31	59.5	72	83	115
mean_bin_size	2.07618e+06	191982	1605461	1951205	2053175	2210307	2543244
median_bin_size	2.05498e+06	170683	1676667	1.93868e+06	2037510	2173772	2524230
mean_bin_contigs	337.659	48.7228	256	305	330	353.5	555
median_bin_contigs	254.805	53.9602	147	222	248	279	433
mean_bin_n50	19770.2	4129.66	5695	17112.5	19755	22672	29843
median_Bin_n50	12181.3	3769.96	4986	9702	11972	14100.5	24714
mean_bin_das_tool_score	0.665122	0.0307386	0.53	0.65	0.67	0.68	0.73
median_bin_das_tool_score	0.682764	0.0658526	0.49	0.65	0.69	0.725	0.84
mean_bin_das_tool_scg_completeness	76.1513	2.85961	62.62	74.62	76.3	78.3	81.98
median_bin_das_tool_scg_completeness	81.212	6.10219	58.82	78.43	82.35	84.31	92.16
mean_bin_das_tool_scg_contamination	7.34821	0.886945	5.57	6.625	7.28	7.96	10.12
median_bin_das_tool_scg_contamination	5.72756	0.843414	3.92	5.26	5.88	5.88	9.8

## Sheet: STable2
Supplementary Table 2. Correlations for identified protein counts, confounding variables and microbial diversity.
Values for continuous variables are provided for Spearman and Pearson correlations calculated with full data
as well as subsets containing only one group of samples (control, iRBD or PD), and for categorical variables for Wilcoxon rank sum (2 categories) or Kruskal-Wallis (3 categories) tests.
Feature	Variable	r_full	p_full	r_Ctrl	p_Ctrl	r_iRBD	p_iRBD	r_PD	p_PD	Type	Data
Identified_protein_counts	Age_sampling	-0.0536417	0.569105	-0.199774	0.183154	-0.0172709	0.937657	0.0374655	0.804756	pearson	clinical
Identified_protein_counts	Age_sampling	-0.0815297	0.38638	-0.20571	0.170214	-0.0446542	0.839673	-0.0175455	0.907864	spearman	clinical
Identified_protein_counts	Agonist_medication	#N/A	0.305692	#N/A	#N/A	#N/A	#N/A	#N/A	0.305692	wilcoxon	clinical
Identified_protein_counts	Antidepressant_medication	#N/A	0.166931	#N/A	0.0176923	#N/A	0.666667	#N/A	0.630274	wilcoxon	clinical
Identified_protein_counts	CaseCtrl	#N/A	0.603398	#N/A	#N/A	#N/A	#N/A	#N/A	#N/A	wilcoxon	clinical
Identified_protein_counts	Constipation	#N/A	0.87033	#N/A	0.553846	#N/A	0.162794	#N/A	0.117072	wilcoxon	clinical
Identified_protein_counts	Diagnosis	#N/A	0.0308777	#N/A	#N/A	#N/A	#N/A	#N/A	#N/A	kruskal	clinical
Identified_protein_counts	Disease_duration_months	0.0338879	0.782217	#N/A	#N/A	0.0231769	0.916401	0.105009	0.48735	pearson	clinical
Identified_protein_counts	Disease_duration_months	0.0562031	0.646455	#N/A	#N/A	-0.164643	0.452827	0.150574	0.317868	spearman	clinical
Identified_protein_counts	Entacapone_medication	#N/A	0.98207	#N/A	#N/A	#N/A	#N/A	#N/A	0.766201	wilcoxon	clinical
Identified_protein_counts	Hoehn_and_Yahr	0.168521	0.112341	#NUM!	#NUM!	#NUM!	#NUM!	0.0292593	0.8559	pearson	clinical
Identified_protein_counts	Hoehn_and_Yahr	0.199552	0.0593397	#NUM!	#NUM!	#NUM!	#NUM!	0.0376001	0.815455	spearman	clinical
Identified_protein_counts	Levodopa_medication	#N/A	0.68055	#N/A	#N/A	#N/A	#N/A	#N/A	0.68055	wilcoxon	clinical
Identified_protein_counts	Metformin_medication	#N/A	0.229231	#N/A	0.498462	#N/A	0.666667	#N/A	0.427046	wilcoxon	clinical
Identified_protein_counts	PD_NMS_sum	-0.0036547	0.974004	-0.16038	0.433834	-0.109303	0.646434	0.269578	0.11184	pearson	clinical
Identified_protein_counts	PD_NMS_sum	0.0210277	0.85126	-0.15511	0.449284	-0.0280846	0.906437	0.293208	0.082646	spearman	clinical
Identified_protein_counts	PPI_medication	#N/A	0.779654	#N/A	0.615385	#N/A	#N/A	#N/A	0.719027	wilcoxon	clinical
Identified_protein_counts	Scopa_AUT_sum	0.0157512	0.891131	-0.410353	0.0373237	-0.0267999	0.9107	0.195971	0.282402	pearson	clinical
Identified_protein_counts	Scopa_AUT_sum	0.0366944	0.749763	-0.424432	0.030687	0.0162265	0.945866	0.252183	0.163793	spearman	clinical
Identified_protein_counts	Sex	#N/A	0.29276	#N/A	0.0606914	#N/A	1	#N/A	0.592337	wilcoxon	clinical
Identified_protein_counts	Sniffin_Sticks_Identification	-0.0104223	0.931257	0.297199	0.140362	0.00751584	0.98469	-0.105748	0.539333	pearson	clinical
Identified_protein_counts	Sniffin_Sticks_Identification	-0.00163178	0.989224	0.380863	0.0549111	-0.142261	0.715032	-0.0628489	0.715749	spearman	clinical
Identified_protein_counts	Statin_medication	#N/A	0.896866	#N/A	0.96	#N/A	0.5	#N/A	0.521885	wilcoxon	clinical
Identified_protein_counts	UPDRS_I_III_sum	0.162279	0.145223	-0.333659	0.0957557	-0.00655213	0.978128	0.0428084	0.804213	pearson	clinical
Identified_protein_counts	UPDRS_I_III_sum	0.14401	0.196777	-0.23589	0.246002	0.0883946	0.710946	0.0519573	0.763457	spearman	clinical
Identified_protein_counts	InvSimpson	0.14818	0.114007	0.177992	0.236628	-0.0163516	0.94097	0.274725	0.064642	pearson	MG adivs
Identified_protein_counts	InvSimpson	0.205644	0.0274673	0.24761	0.0970945	0.0261922	0.90557	0.271124	0.0683717	spearman	MG adivs
Identified_protein_counts	Observed	0.19647	0.0353398	0.297213	0.0448664	0.014276	0.948452	0.143963	0.33982	pearson	MG adivs
Identified_protein_counts	Observed	0.207292	0.0262241	0.259606	0.0814576	0.191347	0.381783	0.137468	0.362278	spearman	MG adivs
Identified_protein_counts	Shannon	0.204349	0.0284787	0.232993	0.119166	-0.0427243	0.84652	0.321104	0.0295643	pearson	MG adivs
Identified_protein_counts	Shannon	0.210911	0.0236621	0.220845	0.140239	0.0780825	0.723242	0.281917	0.0576786	spearman	MG adivs
Identified_protein_counts	InvSimpson	0.0288688	0.759402	0.00021422	0.998873	-0.0949908	0.666372	0.18793	0.211042	pearson	MT adivs
Identified_protein_counts	InvSimpson	0.0613954	0.51452	-0.000925126	0.995131	-0.0766	0.728302	0.224374	0.133851	spearman	MT adivs
Identified_protein_counts	Observed	0.0836069	0.374354	0.0635511	0.674787	-0.134045	0.542016	0.306147	0.0385256	pearson	MT adivs
Identified_protein_counts	Observed	0.0952696	0.311157	0.0520548	0.73117	-0.101385	0.645302	0.277161	0.0622124	spearman	MT adivs
Identified_protein_counts	Shannon	0.0834137	0.375463	-0.0122134	0.935793	-0.134386	0.540977	0.318182	0.0311634	pearson	MT adivs
Identified_protein_counts	Shannon	0.058925	0.531616	0.00844897	0.955559	-0.086978	0.693124	0.214321	0.152639	spearman	MT adivs

## Sheet: STable3
Supplementary Table 3. Annotations of top 10 functional classifications (KOs) from Independent Principal Component Analysis (IPCA) of each data type, as seen in Extended Data Fig 2.
Type	IPC	ENTRY	SYMBOL	NAME	PATHWAYS
Metagenomics	IPC1	K03837	sdaC	serine transporter
Metagenomics	IPC1	K07788	mdtB	multidrug efflux pump	map02020 Two-component system
Metagenomics	IPC1	K13244	yahA	c-di-GMP-specific phosphodiesterase
Metagenomics	IPC1	K15548	aaeA	p-hydroxybenzoic acid efflux pump subunit AaeA
Metagenomics	IPC1	K07312	ynfH	Tat-targeted selenate reductase subunit YnfH
Metagenomics	IPC1	K07789	mdtC	multidrug efflux pump	map02020 Two-component system
Metagenomics	IPC1	K03468	aaeB	p-hydroxybenzoic acid efflux pump subunit AaeB
Metagenomics	IPC1	K12266	norR	anaerobic nitric oxide reductase transcription regulator
Metagenomics	IPC1	K08346	not found	not found	NA
Metagenomics	IPC1	K03080	not found	not found	NA
Metagenomics	IPC2	K08589	rgpA_B	gingipain R	map01503 Cationic antimicrobial peptide (CAMP) resistance
Metagenomics	IPC2	K09699	DBT, bkdB	2-oxoisovalerate dehydrogenase E2 component (dihydrolipoyl transacylase)	map00280 Valine, leucine and isoleucine degradation; map00640 Propanoate metabolism; map01100 Metabolic pathways; map01110 Biosynthesis of secondary metabolites
Metagenomics	IPC2	K15378	SLC45A1_2_4	solute carrier family 45, member 1/2/4
Metagenomics	IPC2	K02613	paaE	ring-1,2-phenylacetyl-CoA epoxidase subunit PaaE	map00360 Phenylalanine metabolism; map01100 Metabolic pathways; map01120 Microbial metabolism in diverse environments
Metagenomics	IPC2	K02875	RP-L14e, RPL14	large subunit ribosomal protein L14e	map03010 Ribosome; map05171 Coronavirus disease - COVID-19
Metagenomics	IPC2	K00809	DHPS, dys	deoxyhypusine synthase
Metagenomics	IPC2	K08000	MMP21	matrix metalloproteinase-21
Metagenomics	IPC2	K06953	K06953	uncharacterized protein
Metagenomics	IPC2	K03167	top6B	DNA topoisomerase VI subunit B
Metagenomics	IPC2	K05100	MST1R, RON, CD136	macrophage-stimulating 1 receptor	map04020 Calcium signaling pathway
Metatranscriptomics	IPC1	K13279	PRDX1	peroxiredoxin 1	map04146 Peroxisome; map05146 Amoebiasis
Metatranscriptomics	IPC1	K02984	RP-S3Ae, RPS3A	small subunit ribosomal protein S3Ae	map03010 Ribosome; map05171 Coronavirus disease - COVID-19
Metatranscriptomics	IPC1	K01900	LSC2	succinyl-CoA synthetase beta subunit	map00020 Citrate cycle (TCA cycle); map00640 Propanoate metabolism; map01100 Metabolic pathways; map01110 Biosynthesis of secondary metabolites; map01120 Microbial metabolism in diverse environments; map01200 Carbon metabolism
Metatranscriptomics	IPC1	K03263	EIF5A	translation initiation factor 5A
Metatranscriptomics	IPC1	K02936	RP-L7Ae, RPL7A	large subunit ribosomal protein L7Ae	map03010 Ribosome; map05171 Coronavirus disease - COVID-19
Metatranscriptomics	IPC1	K02885	RP-L19e, RPL19	large subunit ribosomal protein L19e	map03010 Ribosome; map05171 Coronavirus disease - COVID-19
Metatranscriptomics	IPC1	K03234	EEF2	elongation factor 2	map04152 AMPK signaling pathway; map04921 Oxytocin signaling pathway
Metatranscriptomics	IPC1	K04551	UBB	ubiquitin B	map04120 Ubiquitin mediated proteolysis; map04137 Mitophagy - animal; map05012 Parkinson disease; map05022 Pathways of neurodegeneration - multiple diseases; map05131 Shigellosis; map05167 Kaposi sarcoma-associated herpesvirus infection
Metatranscriptomics	IPC1	K01373	CTSF	cathepsin F	map04142 Lysosome; map04210 Apoptosis; map04626 Plant-pathogen interaction
Metatranscriptomics	IPC1	K01369	LGMN	legumain	map04142 Lysosome; map04612 Antigen processing and presentation
Metatranscriptomics	IPC2	K00150	gap2	glyceraldehyde-3-phosphate dehydrogenase (NAD(P))	map00010 Glycolysis / Gluconeogenesis; map00710 Carbon fixation in photosynthetic organisms; map01100 Metabolic pathways; map01110 Biosynthesis of secondary metabolites; map01120 Microbial metabolism in diverse environments; map01200 Carbon metabolism; map01230 Biosynthesis of amino acids
Metatranscriptomics	IPC2	K03433	psmB, prcB	proteasome beta subunit	map03050 Proteasome
Metatranscriptomics	IPC2	K07068	K07068	uncharacterized protein
Metatranscriptomics	IPC2	K03795	cbiX	sirohydrochlorin cobaltochelatase	map00860 Porphyrin metabolism; map01100 Metabolic pathways; map01240 Biosynthesis of cofactors
Metatranscriptomics	IPC2	K05715	2PGK	2-phosphoglycerate kinase
Metatranscriptomics	IPC2	K16293	psrB	polysulfide reductase chain B
Metatranscriptomics	IPC2	K00205	fwdF, fmdF	4Fe-4S ferredoxin	map00680 Methane metabolism; map01100 Metabolic pathways; map01120 Microbial metabolism in diverse environments; map01200 Carbon metabolism
Metatranscriptomics	IPC2	K14126	mvhA, vhuA, vhcA	F420-non-reducing hydrogenase large subunit	map00680 Methane metabolism; map01100 Metabolic pathways; map01120 Microbial metabolism in diverse environments; map01200 Carbon metabolism
Metatranscriptomics	IPC2	K14128	mvhG, vhuG, vhcG	F420-non-reducing hydrogenase small subunit	map00680 Methane metabolism; map01100 Metabolic pathways; map01120 Microbial metabolism in diverse environments; map01200 Carbon metabolism
Metatranscriptomics	IPC2	K08589	rgpA_B	gingipain R	map01503 Cationic antimicrobial peptide (CAMP) resistance
Metaproteomics	IPC1	K00134	GAPDH, gapA	glyceraldehyde 3-phosphate dehydrogenase (phosphorylating)	map00010 Glycolysis / Gluconeogenesis; map00710 Carbon fixation in photosynthetic organisms; map01100 Metabolic pathways; map01110 Biosynthesis of secondary metabolites; map01120 Microbial metabolism in diverse environments; map01200 Carbon metabolism; map01230 Biosynthesis of amino acids; map04066 HIF-1 signaling pathway; map05010 Alzheimer disease; map05130 Pathogenic Escherichia coli infection…
Metaproteomics	IPC1	K04026	eutL	ethanolamine utilization protein EutL
Metaproteomics	IPC1	K02014	TC.FEV.OM	iron complex outermembrane recepter protein
Metaproteomics	IPC1	K03737	por, nifJ	pyruvate-ferredoxin/flavodoxin oxidoreductase	map00010 Glycolysis / Gluconeogenesis; map00020 Citrate cycle (TCA cycle); map00620 Pyruvate metabolism; map00650 Butanoate metabolism; map00720 Carbon fixation pathways in prokaryotes; map01100 Metabolic pathways; map01110 Biosynthesis of secondary metabolites; map01120 Microbial metabolism in diverse environments; map01200 Carbon metabolism
Metaproteomics	IPC1	K00198	cooS, acsA	anaerobic carbon-monoxide dehydrogenase catalytic subunit	map00633 Nitrotoluene degradation; map00680 Methane metabolism; map00720 Carbon fixation pathways in prokaryotes; map01100 Metabolic pathways; map01120 Microbial metabolism in diverse environments; map01200 Carbon metabolism
Metaproteomics	IPC1	K02358	tuf, TUFM	elongation factor Tu	map04626 Plant-pathogen interaction
Metaproteomics	IPC1	K02988	RP-S5, MRPS5, rpsE	small subunit ribosomal protein S5	map03010 Ribosome
Metaproteomics	IPC1	K02864	RP-L10, MRPL10, rplJ	large subunit ribosomal protein L10	map03010 Ribosome
Metaproteomics	IPC1	K00939	adk, AK	adenylate kinase	map00230 Purine metabolism; map00730 Thiamine metabolism; map01100 Metabolic pathways; map01110 Biosynthesis of secondary metabolites; map01232 Nucleotide metabolism; map01240 Biosynthesis of cofactors
Metaproteomics	IPC1	K02986	RP-S4, rpsD	small subunit ribosomal protein S4	map03010 Ribosome
Metaproteomics	IPC2	K10117	msmE	raffinose/stachyose/melibiose transport system substrate-binding protein	map02010 ABC transporters
Metaproteomics	IPC2	K10439	rbsB	ribose transport system substrate-binding protein	map02010 ABC transporters; map02030 Bacterial chemotaxis
Metaproteomics	IPC2	K02027	ABC.MS.S	multiple sugar transport system substrate-binding protein
Metaproteomics	IPC2	K10559	rhaS	rhamnose transport system substrate-binding protein	map02010 ABC transporters
Metaproteomics	IPC2	K10108	malE	maltose/maltodextrin transport system substrate-binding protein	map02010 ABC transporters; map02030 Bacterial chemotaxis
Metaproteomics	IPC2	K10546	chvE	putative multiple sugar transport system substrate-binding protein	map02010 ABC transporters
Metaproteomics	IPC2	K10540	mglB	methyl-galactoside transport system substrate-binding protein	map02010 ABC transporters; map02030 Bacterial chemotaxis
Metaproteomics	IPC2	K10188	lacE, araN	lactose/L-arabinose transport system substrate-binding protein	map02010 ABC transporters
Metaproteomics	IPC2	K02406	fliC, hag	flagellin	map02020 Two-component system; map02040 Flagellar assembly; map04621 NOD-like receptor signaling pathway; map04626 Plant-pathogen interaction; map05131 Shigellosis; map05132 Salmonella infection; map05134 Legionellosis
Metaproteomics	IPC2	K03111	ssb	single-strand DNA-binding protein	map03030 DNA replication; map03430 Mismatch repair; map03440 Homologous recombination

## Sheet: STable4
Supplementary Table 4. Comparisons of microbial diversity based on MG and MT mOTUs.
a. Alpha diversity (three metrics: observed richness, Shannon index, inverse Simpson index):
continuous variables tested with Spearman and Pearson correlations,
and categorical variables with Wilcoxon rank sum (2 categories) or Kruskal-Wallis (3 categories) tests.
Variable	Diversity_index	Data	r	p	Test
Age_sampling	Observed	MG	0.134948	0.138343	pearson
Age_sampling	Observed	MG	0.110285	0.22655	spearman
Age_sampling	Shannon	MG	0.0830711	0.362993	pearson
Age_sampling	Shannon	MG	0.0965372	0.290154	spearman
Age_sampling	InvSimpson	MG	0.110329	0.226365	pearson
Age_sampling	InvSimpson	MG	0.0499346	0.584922	spearman
Disease_duration_months	Observed	MG	0.0561744	0.636896	pearson
Disease_duration_months	Observed	MG	0.00597559	0.959983	spearman
Disease_duration_months	Shannon	MG	0.0391356	0.74236	pearson
Disease_duration_months	Shannon	MG	-0.0142801	0.904555	spearman
Disease_duration_months	InvSimpson	MG	-0.090088	0.448469	pearson
Disease_duration_months	InvSimpson	MG	-0.0461594	0.698174	spearman
Hoehn_and_Yahr	Observed	MG	-0.00337728	0.973809	pearson
Hoehn_and_Yahr	Observed	MG	0.0458325	0.655756	spearman
Hoehn_and_Yahr	Shannon	MG	-0.0423181	0.680657	pearson
Hoehn_and_Yahr	Shannon	MG	-0.0400759	0.696728	spearman
Hoehn_and_Yahr	InvSimpson	MG	-0.0987951	0.335666	pearson
Hoehn_and_Yahr	InvSimpson	MG	-0.0728966	0.477961	spearman
PD_NMS_sum	Observed	MG	-0.176589	0.097839	pearson
PD_NMS_sum	Observed	MG	-0.115018	0.283134	spearman
PD_NMS_sum	Shannon	MG	-0.191309	0.0725073	pearson
PD_NMS_sum	Shannon	MG	-0.110209	0.303878	spearman
PD_NMS_sum	InvSimpson	MG	-0.173028	0.104905	pearson
PD_NMS_sum	InvSimpson	MG	-0.160567	0.132801	spearman
Scopa_AUT_sum	Observed	MG	-0.0925198	0.399693	pearson
Scopa_AUT_sum	Observed	MG	-0.0429835	0.696092	spearman
Scopa_AUT_sum	Shannon	MG	-0.0877867	0.42434	pearson
Scopa_AUT_sum	Shannon	MG	0.018178	0.868845	spearman
Scopa_AUT_sum	InvSimpson	MG	-0.0417796	0.704204	pearson
Scopa_AUT_sum	InvSimpson	MG	-0.0323132	0.76908	spearman
Sniffin_Sticks_Identification	Observed	MG	-0.184982	0.104938	pearson
Sniffin_Sticks_Identification	Observed	MG	-0.165778	0.14691	spearman
Sniffin_Sticks_Identification	Shannon	MG	-0.0675125	0.557003	pearson
Sniffin_Sticks_Identification	Shannon	MG	-0.0184562	0.872579	spearman
Sniffin_Sticks_Identification	InvSimpson	MG	0.0583008	0.612143	pearson
Sniffin_Sticks_Identification	InvSimpson	MG	0.101604	0.376075	spearman
UPDRS_I_III_sum	Observed	MG	-0.00904576	0.932951	pearson
UPDRS_I_III_sum	Observed	MG	0.00388975	0.971141	spearman
UPDRS_I_III_sum	Shannon	MG	-0.0151746	0.887758	pearson
UPDRS_I_III_sum	Shannon	MG	-0.0362314	0.736053	spearman
UPDRS_I_III_sum	InvSimpson	MG	-0.0531458	0.620855	pearson
UPDRS_I_III_sum	InvSimpson	MG	-0.0650341	0.544848	spearman
CaseCtrl	Observed	MG	#N/A	0.861102	wilcox
CaseCtrl	Shannon	MG	#N/A	0.257095	wilcox
CaseCtrl	InvSimpson	MG	#N/A	0.0999517	wilcox
Diagnosis	Observed	MG	#N/A	0.923907	kruskal
Diagnosis	Shannon	MG	#N/A	0.488666	kruskal
Diagnosis	InvSimpson	MG	#N/A	0.235639	kruskal
Sex	Observed	MG	#N/A	0.614245	wilcox
Sex	Shannon	MG	#N/A	0.925105	wilcox
Sex	InvSimpson	MG	#N/A	0.430347	wilcox
Constipation	Observed	MG	#N/A	0.934358	wilcox
Constipation	Shannon	MG	#N/A	0.782775	wilcox
Constipation	InvSimpson	MG	#N/A	0.569145	wilcox
Antidepressant_medication	Observed	MG	#N/A	0.0489616	wilcox
Antidepressant_medication	Shannon	MG	#N/A	0.0904171	wilcox
Antidepressant_medication	InvSimpson	MG	#N/A	0.126016	wilcox
Metformin_medication	Observed	MG	#N/A	0.632479	wilcox
Metformin_medication	Shannon	MG	#N/A	0.168131	wilcox
Metformin_medication	InvSimpson	MG	#N/A	0.0570048	wilcox
Statin_medication	Observed	MG	#N/A	0.857558	wilcox
Statin_medication	Shannon	MG	#N/A	0.977094	wilcox
Statin_medication	InvSimpson	MG	#N/A	0.919952	wilcox
PPI_medication	Observed	MG	#N/A	0.555942	wilcox
PPI_medication	Shannon	MG	#N/A	0.387477	wilcox
PPI_medication	InvSimpson	MG	#N/A	0.318689	wilcox
Levodopa_medication	Observed	MG	#N/A	0.507074	wilcox
Levodopa_medication	Shannon	MG	#N/A	0.504207	wilcox
Levodopa_medication	InvSimpson	MG	#N/A	0.824612	wilcox
Agonist_medication	Observed	MG	#N/A	0.957741	wilcox
Agonist_medication	Shannon	MG	#N/A	0.986147	wilcox
Agonist_medication	InvSimpson	MG	#N/A	0.663911	wilcox
Entacapone_medication	Observed	MG	#N/A	0.10923	wilcox
Entacapone_medication	Shannon	MG	#N/A	0.0478383	wilcox
Entacapone_medication	InvSimpson	MG	#N/A	0.0663574	wilcox
Age_sampling	Observed	MT	-0.0242837	0.790624	pearson
Age_sampling	Observed	MT	-0.061879	0.49835	spearman
Age_sampling	Shannon	MT	0.0118022	0.89734	pearson
Age_sampling	Shannon	MT	-0.0433168	0.63568	spearman
Age_sampling	InvSimpson	MT	0.0301013	0.742057	pearson
Age_sampling	InvSimpson	MT	-0.0284551	0.755706	spearman
Disease_duration_months	Observed	MT	0.178786	0.130177	pearson
Disease_duration_months	Observed	MT	0.142333	0.229661	spearman
Disease_duration_months	Shannon	MT	0.200027	0.0897483	pearson
Disease_duration_months	Shannon	MT	0.161898	0.171179	spearman
Disease_duration_months	InvSimpson	MT	0.163473	0.166996	pearson
Disease_duration_months	InvSimpson	MT	0.169771	0.151021	spearman
Hoehn_and_Yahr	Observed	MT	-0.120406	0.240089	pearson
Hoehn_and_Yahr	Observed	MT	-0.0875887	0.3936	spearman
Hoehn_and_Yahr	Shannon	MT	-0.118307	0.248444	pearson
Hoehn_and_Yahr	Shannon	MT	-0.0809513	0.430558	spearman
Hoehn_and_Yahr	InvSimpson	MT	-0.0795861	0.438398	pearson
Hoehn_and_Yahr	InvSimpson	MT	-0.0596922	0.561377	spearman
PD_NMS_sum	Observed	MT	0.0457277	0.670459	pearson
PD_NMS_sum	Observed	MT	0.0548361	0.609776	spearman
PD_NMS_sum	Shannon	MT	0.0418626	0.696892	pearson
PD_NMS_sum	Shannon	MT	0.0819243	0.445326	spearman
PD_NMS_sum	InvSimpson	MT	0.0875865	0.414398	pearson
PD_NMS_sum	InvSimpson	MT	0.0822195	0.443682	spearman
Scopa_AUT_sum	Observed	MT	0.0587302	0.593404	pearson
Scopa_AUT_sum	Observed	MT	0.096676	0.378764	spearman
Scopa_AUT_sum	Shannon	MT	0.0688856	0.53103	pearson
Scopa_AUT_sum	Shannon	MT	0.123742	0.259196	spearman
Scopa_AUT_sum	InvSimpson	MT	0.0673539	0.540224	pearson
Scopa_AUT_sum	InvSimpson	MT	0.130335	0.234472	spearman
Sniffin_Sticks_Identification	Observed	MT	-0.0454324	0.692862	pearson
Sniffin_Sticks_Identification	Observed	MT	-0.0655357	0.568634	spearman
Sniffin_Sticks_Identification	Shannon	MT	-0.0143874	0.900507	pearson
Sniffin_Sticks_Identification	Shannon	MT	-0.0615715	0.592294	spearman
Sniffin_Sticks_Identification	InvSimpson	MT	-0.0589722	0.608045	pearson
Sniffin_Sticks_Identification	InvSimpson	MT	-0.0521027	0.650522	spearman
UPDRS_I_III_sum	Observed	MT	-0.0247982	0.817568	pearson
UPDRS_I_III_sum	Observed	MT	0.0155474	0.88502	spearman
UPDRS_I_III_sum	Shannon	MT	-0.0323867	0.763189	pearson
UPDRS_I_III_sum	Shannon	MT	0.0671663	0.531712	spearman
UPDRS_I_III_sum	InvSimpson	MT	0.0536636	0.617452	pearson
UPDRS_I_III_sum	InvSimpson	MT	0.102059	0.341249	spearman
CaseCtrl	Observed	MT	#N/A	0.820192	wilcox
CaseCtrl	Shannon	MT	#N/A	0.912669	wilcox
CaseCtrl	InvSimpson	MT	#N/A	0.824346	wilcox
Diagnosis	Observed	MT	#N/A	0.58468	kruskal
Diagnosis	Shannon	MT	#N/A	0.570988	kruskal
Diagnosis	InvSimpson	MT	#N/A	0.725769	kruskal
Sex	Observed	MT	#N/A	0.401666	wilcox
Sex	Shannon	MT	#N/A	0.455174	wilcox
Sex	InvSimpson	MT	#N/A	0.612445	wilcox
Constipation	Observed	MT	#N/A	0.900217	wilcox
Constipation	Shannon	MT	#N/A	0.922984	wilcox
Constipation	InvSimpson	MT	#N/A	0.894603	wilcox
Antidepressant_medication	Observed	MT	#N/A	0.144479	wilcox
Antidepressant_medication	Shannon	MT	#N/A	0.131145	wilcox
Antidepressant_medication	InvSimpson	MT	#N/A	0.116226	wilcox
Metformin_medication	Observed	MT	#N/A	0.97755	wilcox
Metformin_medication	Shannon	MT	#N/A	0.843913	wilcox
Metformin_medication	InvSimpson	MT	#N/A	0.742796	wilcox
Statin_medication	Observed	MT	#N/A	0.615164	wilcox
Statin_medication	Shannon	MT	#N/A	0.677166	wilcox
Statin_medication	InvSimpson	MT	#N/A	0.442447	wilcox
PPI_medication	Observed	MT	#N/A	0.505914	wilcox
PPI_medication	Shannon	MT	#N/A	0.347128	wilcox
PPI_medication	InvSimpson	MT	#N/A	0.327989	wilcox
Levodopa_medication	Observed	MT	#N/A	0.191973	wilcox
Levodopa_medication	Shannon	MT	#N/A	0.371472	wilcox
Levodopa_medication	InvSimpson	MT	#N/A	0.448482	wilcox
Agonist_medication	Observed	MT	#N/A	0.51315	wilcox
Agonist_medication	Shannon	MT	#N/A	0.30279	wilcox
Agonist_medication	InvSimpson	MT	#N/A	0.286494	wilcox
Entacapone_medication	Observed	MT	#N/A	0.216904	wilcox
Entacapone_medication	Shannon	MT	#N/A	0.136434	wilcox
Entacapone_medication	InvSimpson	MT	#N/A	0.141884	wilcox
b. Beta diversity, testing performed with PERMANOVA (“adonis” command for single-variable tests, columns p_adonis and R2_adonis,
and “adonis2” for multi-variable tests of main contrast and confounders, columns p_adonis2 and R2_adonis, both functions from the R package vegan).
Variable	p_adonis	R2_adonis	p_adonis2	R2_adonis2	Data
CaseCtrl	0.311	0.00889056	0.0438	0.0112956	MG
Sex	0.044	0.0117162	0.0058	0.0140242	MG
Age_sampling	0.005	0.0150349	0.0004	0.0161016	MG
Disease_duration_months	0.461	0.0139307	#N/A	#N/A	MG
PD_NMS_sum	0.677	0.0101988	#N/A	#N/A	MG
UPDRS_I_III_sum	0.523	0.0109687	#N/A	#N/A	MG
Scopa_AUT_sum	0.499	0.0115606	#N/A	#N/A	MG
Sniffin_Sticks_Identification	0.011	0.0207229	#N/A	#N/A	MG
Hoehn_and_Yahr	0.377	0.0106363	#N/A	#N/A	MG
Diagnosis	0.221	0.0182488	#N/A	#N/A	MG
Constipation	0.247	0.0112312	#N/A	#N/A	MG
Antidepressant_medication	0.042	0.0182144	#N/A	#N/A	MG
Metformin_medication	0.788	0.0111178	#N/A	#N/A	MG
Statin_medication	0.15	0.0152077	#N/A	#N/A	MG
PPI_medication	0.933	0.0115312	#N/A	#N/A	MG
Levodopa_medication	0.797	0.0246313	#N/A	#N/A	MG
Agonist_medication	0.089	0.0355301	#N/A	#N/A	MG
Entacapone_medication	0.229	0.0148122	#N/A	#N/A	MG
Age_sampling	0.517	0.00797274	0.1923	0.00938794	MT
Sex	0.01	0.013801	0.0009	0.0170165	MT
CaseCtrl	0.001	0.0164204	0.0002	0.0186361	MT
Disease_duration_months	0.647	0.0125824	#N/A	#N/A	MT
PD_NMS_sum	0.306	0.012091	#N/A	#N/A	MT
UPDRS_I_III_sum	0.081	0.0147868	#N/A	#N/A	MT
Scopa_AUT_sum	0.584	0.0111982	#N/A	#N/A	MT
Sniffin_Sticks_Identification	0.002	0.0241016	#N/A	#N/A	MT
Hoehn_and_Yahr	0.048	0.0140916	#N/A	#N/A	MT
Diagnosis	0.007	0.024928	#N/A	#N/A	MT
Constipation	0.002	0.0176928	#N/A	#N/A	MT
Antidepressant_medication	0.102	0.0160307	#N/A	#N/A	MT
Metformin_medication	0.875	0.0105124	#N/A	#N/A	MT
Statin_medication	0.265	0.0142248	#N/A	#N/A	MT
PPI_medication	0.272	0.0175254	#N/A	#N/A	MT
Levodopa_medication	0.393	0.0292356	#N/A	#N/A	MT
Agonist_medication	0.034	0.0415691	#N/A	#N/A	MT
Entacapone_medication	0.114	0.0162362	#N/A	#N/A	MT

## Sheet: STable5
Supplementary Table 5. Differential abundance of taxonomically classified MG and MT sequence reads (from mOTUs), compared with DESeq2, corrected for age and sex.
Contrasts include the two-category case (PD or iRBD) vs control variable, and pairwise contrasts for the three-group variable (PD/Ctrl, iRBD/Ctrl, PD/iRBD).
taxon	level	baseMean	log2FoldChange	lfcSE	stat	pvalue	padj	Contrast	Data
p__Actinobacteria	phy	823.435	0.0513481	0.176951	0.290182	0.771677	0.90029	Case/Ctrl	MG
p__Bacteria phylum incertae sedis	phy	49.6169	-0.598781	0.397379	-1.50683	0.131855	0.307663	Case/Ctrl	MG
p__Bacteroidetes	phy	2450.19	-0.0629252	0.178341	-0.352836	0.724211	0.90029	Case/Ctrl	MG
p__Euryarchaeota	phy	42.2293	1.3165	0.777621	1.69299	0.0904582	0.307663	Case/Ctrl	MG
p__Firmicutes	phy	10050	-0.118349	0.130535	-0.906645	#N/A	#N/A	Case/Ctrl	MG
p__Lentisphaerae	phy	3.90614	0.0327502	0.589704	0.0555366	0.955711	0.955711	Case/Ctrl	MG
p__Proteobacteria	phy	275.63	0.265017	0.229158	1.15648	0.247484	0.433098	Case/Ctrl	MG
p__Verrucomicrobia	phy	124.334	0.916324	0.462895	1.97955	0.0477539	0.307663	Case/Ctrl	MG
p__Actinobacteria	phy	823.435	-0.0197932	0.193064	-0.102522	0.918343	0.938705	PD/Ctrl	MG
p__Bacteria phylum incertae sedis	phy	49.6169	-0.612008	0.434917	-1.40718	0.159373	0.443087	PD/Ctrl	MG
p__Bacteroidetes	phy	2450.19	-0.0149766	0.194762	-0.076897	0.938705	0.938705	PD/Ctrl	MG
p__Euryarchaeota	phy	42.2293	1.26231	0.851803	1.48193	0.138359	0.443087	PD/Ctrl	MG
p__Firmicutes	phy	10050	-0.165504	0.14243	-1.162	#N/A	#N/A	PD/Ctrl	MG
p__Lentisphaerae	phy	3.90614	0.111889	0.64761	0.172772	0.862831	0.938705	PD/Ctrl	MG
p__Proteobacteria	phy	275.63	0.327955	0.250177	1.31089	0.189894	0.443087	PD/Ctrl	MG
p__Verrucomicrobia	phy	124.334	0.557159	0.502651	1.10844	0.267671	0.468424	PD/Ctrl	MG
p__Actinobacteria	phy	823.435	0.171787	0.233814	0.734714	0.462513	0.663066	iRBD/Ctrl	MG
p__Bacteria phylum incertae sedis	phy	49.6169	-0.566248	0.526108	-1.0763	0.281795	0.657522	iRBD/Ctrl	MG
p__Bacteroidetes	phy	2450.19	-0.169078	0.235944	-0.716604	0.473618	0.663066	iRBD/Ctrl	MG
p__Euryarchaeota	phy	42.2293	1.41034	1.03165	1.36706	0.171606	0.60062	iRBD/Ctrl	MG
p__Firmicutes	phy	10050	-0.024126	0.172548	-0.139822	#N/A	#N/A	iRBD/Ctrl	MG
p__Lentisphaerae	phy	3.90614	-0.107429	0.779199	-0.137872	0.890342	0.890342	iRBD/Ctrl	MG
p__Proteobacteria	phy	275.63	0.112912	0.30301	0.372634	0.709421	0.827658	iRBD/Ctrl	MG
p__Verrucomicrobia	phy	124.334	1.43779	0.608613	2.3624	0.0181571	0.127099	iRBD/Ctrl	MG
p__Actinobacteria	phy	823.435	-0.19158	0.229413	-0.835088	0.403668	0.884869	PD/iRBD	MG
p__Bacteria phylum incertae sedis	phy	49.6169	-0.0457603	0.516425	-0.0886098	0.929392	0.929392	PD/iRBD	MG
p__Bacteroidetes	phy	2450.19	0.154102	0.231508	0.665643	0.505639	0.884869	PD/iRBD	MG
p__Euryarchaeota	phy	42.2293	-0.148025	1.01166	-0.146319	0.88367	0.929392	PD/iRBD	MG
p__Firmicutes	phy	10050	-0.141378	0.169306	-0.835042	#N/A	#N/A	PD/iRBD	MG
p__Lentisphaerae	phy	3.90614	0.219318	0.762968	0.287454	0.773765	0.929392	PD/iRBD	MG
p__Proteobacteria	phy	275.63	0.215044	0.297238	0.723472	0.46939	0.884869	PD/iRBD	MG
p__Verrucomicrobia	phy	124.334	-0.880627	0.597008	-1.47507	0.140194	0.884869	PD/iRBD	MG
c__Actinobacteria	cla	367.638	0.136775	0.31706	0.431386	0.666187	0.882686	Case/Ctrl	MG
c__Alphaproteobacteria	cla	56.299	-0.310264	0.830129	-0.373753	0.708588	0.882686	Case/Ctrl	MG
c__Bacilli	cla	124.321	1.03833	0.330842	3.13846	0.00169838	0.0339675	Case/Ctrl	MG
c__Bacteria class incertae sedis	cla	63.0568	-0.419519	0.431031	-0.973291	0.330409	0.882686	Case/Ctrl	MG
c__Bacteroidia	cla	2484.39	0.035819	0.186449	0.192112	0.847655	0.882686	Case/Ctrl	MG
c__Betaproteobacteria	cla	67.2127	-0.0890592	0.202217	-0.440413	0.659638	0.882686	Case/Ctrl	MG
c__Clostridia	cla	8784.43	-0.0478625	0.126495	-0.378376	0.705151	0.882686	Case/Ctrl	MG
c__Coriobacteriia	cla	458.763	-0.0367601	0.165255	-0.222445	0.823968	0.882686	Case/Ctrl	MG
c__Deltaproteobacteria	cla	34.6272	-0.496803	0.307845	-1.61381	0.106569	0.532844	Case/Ctrl	MG
c__Erysipelotrichia	cla	124.996	0.0775501	0.300482	0.258086	0.79634	0.882686	Case/Ctrl	MG
c__Firmicutes class [Clostridia/Bacilli]	cla	44.0537	-0.631849	0.783681	-0.806258	0.420094	0.882686	Case/Ctrl	MG
c__Firmicutes class [Clostridia/Erysipelotrichia]	cla	21.262	0.839547	0.492286	1.70541	0.0881189	0.532844	Case/Ctrl	MG
c__Firmicutes class [Negativicutes/Bacilli]	cla	26.1909	-0.463261	0.93946	-0.493114	0.621932	0.882686	Case/Ctrl	MG
c__Firmicutes class incertae sedis	cla	236.186	-0.114745	0.289569	-0.39626	0.691913	0.882686	Case/Ctrl	MG
c__Gammaproteobacteria	cla	133.615	0.46455	0.45905	1.01198	0.311546	0.882686	Case/Ctrl	MG
c__Lentisphaerae class incertae sedis	cla	4.35671	0.0826898	0.560363	0.147565	0.882686	0.882686	Case/Ctrl	MG
c__Methanobacteria	cla	42.7045	1.05949	0.790165	1.34085	0.179969	0.719876	Case/Ctrl	MG
c__Negativicutes	cla	229.473	-0.251567	0.362569	-0.693845	0.487779	0.882686	Case/Ctrl	MG
c__Tissierellia	cla	0.760211	0.295056	0.575524	0.512673	0.60818	0.882686	Case/Ctrl	MG
c__Verrucomicrobiae	cla	134.079	0.954565	0.506954	1.88294	0.059708	0.532844	Case/Ctrl	MG
c__Actinobacteria	cla	367.638	-0.113269	0.344227	-0.329054	0.742115	0.890538	PD/Ctrl	MG
c__Alphaproteobacteria	cla	56.299	-0.64717	0.903565	-0.716241	0.473843	0.834563	PD/Ctrl	MG
c__Bacilli	cla	124.321	1.16158	0.360571	3.22151	0.00127517	0.022953	PD/Ctrl	MG
c__Bacteria class incertae sedis	cla	63.0568	-0.282798	0.46977	-0.601992	0.547179	0.834563	PD/Ctrl	MG
c__Bacteroidia	cla	2484.39	0.0840864	0.203459	0.413285	0.679398	0.890538	PD/Ctrl	MG
c__Betaproteobacteria	cla	67.2127	0.035394	0.219141	0.161513	0.87169	0.980651	PD/Ctrl	MG
c__Clostridia	cla	8784.43	-0.117057	0.137303	-0.852545	0.393912	0.834563	PD/Ctrl	MG
c__Coriobacteriia	cla	458.763	0.00992515	0.180295	0.0550496	0.956099	0.995523	PD/Ctrl	MG
c__Deltaproteobacteria	cla	34.6272	-0.243929	0.330579	-0.737884	0.460585	0.834563	PD/Ctrl	MG
c__Erysipelotrichia	cla	124.996	0.404151	0.319344	1.26557	0.205668	0.783055	PD/Ctrl	MG
c__Firmicutes class [Clostridia/Bacilli]	cla	44.0537	-0.647562	0.859082	-0.753783	#N/A	#N/A	PD/Ctrl	MG
c__Firmicutes class [Clostridia/Erysipelotrichia]	cla	21.262	-0.425565	0.513544	-0.828682	#N/A	#N/A	PD/Ctrl	MG
c__Firmicutes class [Negativicutes/Bacilli]	cla	26.1909	-1.50237	1.01204	-1.4845	0.137676	0.783055	PD/Ctrl	MG
c__Firmicutes class incertae sedis	cla	236.186	-0.185987	0.316179	-0.588234	0.556376	0.834563	PD/Ctrl	MG
c__Gammaproteobacteria	cla	133.615	0.583649	0.500981	1.16501	0.244014	0.783055	PD/Ctrl	MG
c__Lentisphaerae class incertae sedis	cla	4.35671	0.211961	0.614361	0.34501	0.730087	0.890538	PD/Ctrl	MG
c__Methanobacteria	cla	42.7045	0.978586	0.866058	1.12993	0.258505	0.783055	PD/Ctrl	MG
c__Negativicutes	cla	229.473	-0.00219703	0.391513	-0.00561164	0.995523	0.995523	PD/Ctrl	MG
c__Tissierellia	cla	0.760211	0.41392	0.623354	0.664021	0.506677	0.834563	PD/Ctrl	MG
c__Verrucomicrobiae	cla	134.079	0.620289	0.551864	1.12399	0.261018	0.783055	PD/Ctrl	MG
c__Actinobacteria	cla	367.638	0.468385	0.416852	1.12362	0.261172	0.522345	iRBD/Ctrl	MG
c__Alphaproteobacteria	cla	56.299	0.646311	1.09397	0.590794	0.554658	0.81239	iRBD/Ctrl	MG
c__Bacilli	cla	124.321	0.79889	0.436933	1.8284	0.0674892	0.242961	iRBD/Ctrl	MG
c__Bacteria class incertae sedis	cla	63.0568	-0.836693	0.568945	-1.4706	0.141398	0.424195	iRBD/Ctrl	MG
c__Bacteroidia	cla	2484.39	-0.0718049	0.246485	-0.291316	0.77081	0.924972	iRBD/Ctrl	MG
c__Betaproteobacteria	cla	67.2127	-0.351741	0.265244	-1.3261	0.184805	0.475213	iRBD/Ctrl	MG
c__Clostridia	cla	8784.43	0.0910323	0.166334	0.547285	0.584183	0.81239	iRBD/Ctrl	MG
c__Coriobacteriia	cla	458.763	-0.131725	0.218382	-0.603186	0.546385	0.81239	iRBD/Ctrl	MG
c__Deltaproteobacteria	cla	34.6272	-1.10052	0.402056	-2.73722	0.00619609	0.11153	iRBD/Ctrl	MG
c__Erysipelotrichia	cla	124.996	-0.789008	0.387259	-2.03742	0.0416084	0.226267	iRBD/Ctrl	MG
c__Firmicutes class [Clostridia/Bacilli]	cla	44.0537	-0.595107	1.04079	-0.571784	#N/A	#N/A	iRBD/Ctrl	MG
c__Firmicutes class [Clostridia/Erysipelotrichia]	cla	21.262	2.19249	0.617409	3.55112	#N/A	#N/A	iRBD/Ctrl	MG
c__Firmicutes class [Negativicutes/Bacilli]	cla	26.1909	0.665336	1.22398	0.543586	0.586726	0.81239	iRBD/Ctrl	MG
c__Firmicutes class incertae sedis	cla	236.186	0.022111	0.382911	0.0577444	0.953952	0.997762	iRBD/Ctrl	MG
c__Gammaproteobacteria	cla	133.615	0.202617	0.607054	0.33377	0.738553	0.924972	iRBD/Ctrl	MG
c__Lentisphaerae class incertae sedis	cla	4.35671	-0.121742	0.739172	-0.164701	0.86918	0.977827	iRBD/Ctrl	MG
c__Methanobacteria	cla	42.7045	1.18467	1.049	1.12933	0.258757	0.522345	iRBD/Ctrl	MG
c__Negativicutes	cla	229.473	-0.92859	0.474361	-1.95756	0.0502817	0.226267	iRBD/Ctrl	MG
c__Tissierellia	cla	0.760211	-0.00214808	0.765881	-0.00280472	0.997762	0.997762	iRBD/Ctrl	MG
c__Verrucomicrobiae	cla	134.079	1.41048	0.668374	2.11032	0.0348309	0.226267	iRBD/Ctrl	MG
c__Actinobacteria	cla	367.638	-0.581655	0.40901	-1.4221	0.154996	0.456552	PD/iRBD	MG
c__Alphaproteobacteria	cla	56.299	-1.29348	1.0736	-1.20481	0.228276	0.456552	PD/iRBD	MG
c__Bacilli	cla	124.321	0.362692	0.428201	0.847015	0.396987	0.649615	PD/iRBD	MG
c__Bacteria class incertae sedis	cla	63.0568	0.553895	0.558232	0.99223	0.321085	0.577954	PD/iRBD	MG
c__Bacteroidia	cla	2484.39	0.155891	0.241848	0.644583	0.519197	0.65215	PD/iRBD	MG
c__Betaproteobacteria	cla	67.2127	0.387135	0.260057	1.48865	0.136579	0.456552	PD/iRBD	MG
c__Clostridia	cla	8784.43	-0.208089	0.163209	-1.27499	0.202312	0.456552	PD/iRBD	MG
c__Coriobacteriia	cla	458.763	0.14165	0.214257	0.661123	0.508533	0.65215	PD/iRBD	MG
c__Deltaproteobacteria	cla	34.6272	0.856588	0.394842	2.16945	0.0300489	0.27044	PD/iRBD	MG
c__Erysipelotrichia	cla	124.996	1.19316	0.379815	3.14142	0.00168131	0.0302637	PD/iRBD	MG
c__Firmicutes class [Clostridia/Bacilli]	cla	44.0537	-0.0524549	1.02151	-0.0513506	#N/A	#N/A	PD/iRBD	MG
c__Firmicutes class [Clostridia/Erysipelotrichia]	cla	21.262	-2.61806	0.606767	-4.31477	#N/A	#N/A	PD/iRBD	MG
c__Firmicutes class [Negativicutes/Bacilli]	cla	26.1909	-2.1677	1.20233	-1.80292	0.0714013	0.321306	PD/iRBD	MG
c__Firmicutes class incertae sedis	cla	236.186	-0.208098	0.375737	-0.553839	0.579689	0.65215	PD/iRBD	MG
c__Gammaproteobacteria	cla	133.615	0.381033	0.595539	0.639812	0.522295	0.65215	PD/iRBD	MG
c__Lentisphaerae class incertae sedis	cla	4.35671	0.333703	0.722899	0.461618	0.644355	0.682259	PD/iRBD	MG
c__Methanobacteria	cla	42.7045	-0.206089	1.0288	-0.20032	0.84123	0.84123	PD/iRBD	MG
c__Negativicutes	cla	229.473	0.926393	0.465402	1.99052	0.0465337	0.279202	PD/iRBD	MG
c__Tissierellia	cla	0.760211	0.416068	0.741279	0.561283	0.574604	0.65215	PD/iRBD	MG
c__Verrucomicrobiae	cla	134.079	-0.790194	0.65562	-1.20526	0.228102	0.456552	PD/iRBD	MG
o__Acidaminococcales	ord	61.2551	-0.834559	0.796976	-1.04716	0.295027	0.804619	Case/Ctrl	MG
o__Actinobacteria order [Actinomycetales/Micrococcales]	ord	1.88543	0.154388	0.292229	0.528311	0.597283	0.909813	Case/Ctrl	MG
o__Actinomycetales	ord	12.714	0.137471	0.216998	0.633514	0.526398	0.909813	Case/Ctrl	MG
o__Bacillales	ord	24.7082	2.58616	0.653706	3.95615	7.6168e-05	0.00228504	Case/Ctrl	MG
o__Bacteria order incertae sedis	ord	65.1171	-0.360141	0.433867	-0.830071	0.406499	0.909813	Case/Ctrl	MG
o__Bacteroidales	ord	2462.5	0.0666143	0.180262	0.369542	0.711724	0.909813	Case/Ctrl	MG
o__Bifidobacteriales	ord	364.524	0.159087	0.392954	0.404848	0.685589	0.909813	Case/Ctrl	MG
o__Burkholderiales	ord	69.7676	-0.0803538	0.215225	-0.373349	0.708889	0.909813	Case/Ctrl	MG
o__Clostridia order incertae sedis	ord	16.4709	-0.651449	0.541944	-1.20206	#N/A	#N/A	Case/Ctrl	MG
o__Clostridiales	ord	8676.26	-0.0257164	0.116755	-0.22026	0.825669	0.952695	Case/Ctrl	MG
o__Coriobacteriales	ord	280.17	-0.113351	0.23725	-0.47777	0.632814	0.909813	Case/Ctrl	MG
o__Coriobacteriia order incertae sedis	ord	4.16426	-0.354601	0.516082	-0.687102	0.492018	0.909813	Case/Ctrl	MG
o__Desulfovibrionales	ord	34.3439	-0.490519	0.31248	-1.56976	0.116471	0.580131	Case/Ctrl	MG
o__Eggerthellales	ord	158.333	0.00860822	0.170108	0.0506044	0.959641	0.981071	Case/Ctrl	MG
o__Enterobacterales	ord	99.4939	1.62497	0.550625	2.95114	0.00316608	0.0474912	Case/Ctrl	MG
o__Erysipelotrichales	ord	129.646	0.175199	0.305496	0.573491	0.566313	0.909813	Case/Ctrl	MG
o__Firmicutes order [Acidaminococcales/Lactobacillales]	ord	27.2978	-0.148707	0.94905	-0.156691	0.875489	0.972765	Case/Ctrl	MG
o__Firmicutes order [Clostridiales/Erysipelotrichales]	ord	22.9713	0.774641	0.503039	1.53992	0.12358	0.580131	Case/Ctrl	MG
o__Firmicutes order [Clostridiales/Lactobacillales]	ord	35.4914	-0.267493	0.768687	-0.347986	0.72785	0.909813	Case/Ctrl	MG
o__Firmicutes order incertae sedis	ord	235.417	-0.182177	0.286291	-0.636335	0.524558	0.909813	Case/Ctrl	MG
o__Lactobacillales	ord	93.712	0.761745	0.34297	2.22103	0.0263491	0.263491	Case/Ctrl	MG
o__Lentisphaerae order incertae sedis	ord	4.59826	0.0627523	0.559151	0.112228	0.910643	0.975689	Case/Ctrl	MG
o__Methanobacteriales	ord	41.0187	1.16258	0.788016	1.47532	0.140126	0.580131	Case/Ctrl	MG
o__Micrococcales	ord	2.17155	0.489164	0.343726	1.42312	0.154701	0.580131	Case/Ctrl	MG
o__Pasteurellales	ord	1.8958	-0.892762	0.672439	-1.32765	0.184295	0.614316	Case/Ctrl	MG
o__Propionibacteriales	ord	1.03003	0.0101838	0.429216	0.0237264	0.981071	0.981071	Case/Ctrl	MG
o__Pseudomonadales	ord	34.0269	-0.716942	0.733487	-0.977443	0.32835	0.820874	Case/Ctrl	MG
o__Rhodospirillales	ord	72.6255	-0.246302	0.858877	-0.286772	0.774287	0.929144	Case/Ctrl	MG
o__Tissierellales	ord	0.716303	0.279424	0.554685	0.503752	0.614436	0.909813	Case/Ctrl	MG
o__Veillonellales	ord	136.631	0.541715	0.494178	1.09619	0.272994	0.804619	Case/Ctrl	MG
o__Verrucomicrobiales	ord	132.28	1.00604	0.50353	1.99798	0.0457193	0.342895	Case/Ctrl	MG
o__Acidaminococcales	ord	61.2551	0.0345063	0.827066	0.0417213	0.966721	0.985988	PD/Ctrl	MG
o__Actinobacteria order [Actinomycetales/Micrococcales]	ord	1.88543	0.312335	0.311259	1.00346	0.315639	0.781344	PD/Ctrl	MG
o__Actinomycetales	ord	12.714	0.202559	0.236369	0.85696	0.391467	0.781344	PD/Ctrl	MG
o__Bacillales	ord	24.7082	1.97652	0.708148	2.79111	0.00525271	0.049748	PD/Ctrl	MG
o__Bacteria order incertae sedis	ord	65.1171	-0.248978	0.473433	-0.525899	0.598958	0.882676	PD/Ctrl	MG
o__Bacteroidales	ord	2462.5	0.0934195	0.197095	0.473981	0.635513	0.889719	PD/Ctrl	MG
o__Bifidobacteriales	ord	364.524	-0.171809	0.426698	-0.402649	0.687207	0.905967	PD/Ctrl	MG
o__Burkholderiales	ord	69.7676	-0.00412611	0.234949	-0.0175617	0.985988	0.985988	PD/Ctrl	MG
o__Clostridia order incertae sedis	ord	16.4709	-1.15876	0.587311	-1.97299	#N/A	#N/A	PD/Ctrl	MG
o__Clostridiales	ord	8676.26	-0.120311	0.126002	-0.954833	0.339662	0.781344	PD/Ctrl	MG
o__Coriobacteriales	ord	280.17	-0.0157691	0.258506	-0.0610009	0.951359	0.985988	PD/Ctrl	MG
o__Coriobacteriia order incertae sedis	ord	4.16426	-0.0806957	0.556762	-0.144938	0.88476	0.985988	PD/Ctrl	MG
o__Desulfovibrionales	ord	34.3439	-0.24139	0.336507	-0.717342	0.473163	0.781344	PD/Ctrl	MG
o__Eggerthellales	ord	158.333	-0.0634957	0.185629	-0.342057	0.732308	0.905967	PD/Ctrl	MG
o__Enterobacterales	ord	99.4939	1.75326	0.600789	2.91826	0.00351989	0.049748	PD/Ctrl	MG
o__Erysipelotrichales	ord	129.646	0.504775	0.325529	1.55063	0.120991	0.677548	PD/Ctrl	MG
o__Firmicutes order [Acidaminococcales/Lactobacillales]	ord	27.2978	-1.18721	1.02041	-1.16346	0.244643	0.781344	PD/Ctrl	MG
o__Firmicutes order [Clostridiales/Erysipelotrichales]	ord	22.9713	-0.882349	0.516543	-1.70818	#N/A	#N/A	PD/Ctrl	MG
o__Firmicutes order [Clostridiales/Lactobacillales]	ord	35.4914	-0.264477	0.841572	-0.314265	0.75332	0.905967	PD/Ctrl	MG
o__Firmicutes order incertae sedis	ord	235.417	-0.332573	0.311756	-1.06677	0.286075	0.781344	PD/Ctrl	MG
o__Lactobacillales	ord	93.712	1.02303	0.367154	2.78637	0.00533014	0.049748	PD/Ctrl	MG
o__Lentisphaerae order incertae sedis	ord	4.59826	0.17384	0.612485	0.283827	0.776543	0.905967	PD/Ctrl	MG
o__Methanobacteriales	ord	41.0187	1.05016	0.862373	1.21776	0.223315	0.781344	PD/Ctrl	MG
o__Micrococcales	ord	2.17155	0.26864	0.375531	0.715359	0.474387	0.781344	PD/Ctrl	MG
o__Pasteurellales	ord	1.8958	-0.873017	0.740902	-1.17832	0.238671	0.781344	PD/Ctrl	MG
o__Propionibacteriales	ord	1.03003	0.357246	0.450927	0.792249	0.428216	0.781344	PD/Ctrl	MG
o__Pseudomonadales	ord	34.0269	-2.04963	0.784897	-2.61134	0.00901887	0.0631321	PD/Ctrl	MG
o__Rhodospirillales	ord	72.6255	-0.773822	0.923923	-0.83754	0.402289	0.781344	PD/Ctrl	MG
o__Tissierellales	ord	0.716303	0.362854	0.603454	0.601294	0.547644	0.851891	PD/Ctrl	MG
o__Veillonellales	ord	136.631	0.605	0.539921	1.12053	#N/A	#N/A	PD/Ctrl	MG
o__Verrucomicrobiales	ord	132.28	0.61573	0.547092	1.12546	0.260394	0.781344	PD/Ctrl	MG
o__Acidaminococcales	ord	61.2551	-3.95414	1.0081	-3.92237	8.76823e-05	0.0024551	iRBD/Ctrl	MG
o__Actinobacteria order [Actinomycetales/Micrococcales]	ord	1.88543	-0.23402	0.393113	-0.595299	0.551643	0.735525	iRBD/Ctrl	MG
o__Actinomycetales	ord	12.714	-0.0138697	0.286387	-0.0484298	0.961374	0.973078	iRBD/Ctrl	MG
o__Bacillales	ord	24.7082	3.10171	0.856429	3.62167	0.000292703	0.00409784	iRBD/Ctrl	MG
o__Bacteria order incertae sedis	ord	65.1171	-0.694846	0.573395	-1.21181	0.225585	0.509187	iRBD/Ctrl	MG
o__Bacteroidales	ord	2462.5	0.00805822	0.238776	0.0337481	0.973078	0.973078	iRBD/Ctrl	MG
o__Bifidobacteriales	ord	364.524	0.55576	0.516804	1.07538	0.282205	0.509187	iRBD/Ctrl	MG
o__Burkholderiales	ord	69.7676	-0.233825	0.284319	-0.822402	0.410848	0.638109	iRBD/Ctrl	MG
o__Clostridia order incertae sedis	ord	16.4709	0.118994	0.709294	0.167765	#N/A	#N/A	iRBD/Ctrl	MG
o__Clostridiales	ord	8676.26	0.161192	0.152642	1.05601	0.290964	0.509187	iRBD/Ctrl	MG
o__Coriobacteriales	ord	280.17	-0.339172	0.313204	-1.08291	0.278848	0.509187	iRBD/Ctrl	MG
o__Coriobacteriia order incertae sedis	ord	4.16426	-1.12462	0.686669	-1.63779	0.101466	0.355131	iRBD/Ctrl	MG
o__Desulfovibrionales	ord	34.3439	-1.0616	0.409154	-2.59463	0.0094694	0.0883811	iRBD/Ctrl	MG
o__Eggerthellales	ord	158.333	0.137667	0.224634	0.612851	0.539975	0.735525	iRBD/Ctrl	MG
o__Enterobacterales	ord	99.4939	1.31176	0.728239	1.80128	0.0716588	0.334408	iRBD/Ctrl	MG
o__Erysipelotrichales	ord	129.646	-0.675294	0.394764	-1.71063	0.0871499	0.3486	iRBD/Ctrl	MG
o__Firmicutes order [Acidaminococcales/Lactobacillales]	ord	27.2978	0.967866	1.23442	0.784064	0.433002	0.638109	iRBD/Ctrl	MG
o__Firmicutes order [Clostridiales/Erysipelotrichales]	ord	22.9713	2.1912	0.619967	3.53438	#N/A	#N/A	iRBD/Ctrl	MG
o__Firmicutes order [Clostridiales/Lactobacillales]	ord	35.4914	-0.274341	1.01956	-0.269077	0.78787	0.952731	iRBD/Ctrl	MG
o__Firmicutes order incertae sedis	ord	235.417	0.0875386	0.377506	0.231886	0.816626	0.952731	iRBD/Ctrl	MG
o__Lactobacillales	ord	93.712	-0.16874	0.445538	-0.378732	0.704887	0.897128	iRBD/Ctrl	MG
o__Lentisphaerae order incertae sedis	ord	4.59826	-0.108714	0.737155	-0.147477	0.882755	0.969965	iRBD/Ctrl	MG
o__Methanobacteriales	ord	41.0187	1.33102	1.04453	1.27427	0.202566	0.509187	iRBD/Ctrl	MG
o__Micrococcales	ord	2.17155	0.934913	0.43955	2.12698	0.033422	0.187163	iRBD/Ctrl	MG
o__Pasteurellales	ord	1.8958	-0.955658	0.897037	-1.06535	0.286718	0.509187	iRBD/Ctrl	MG
o__Propionibacteriales	ord	1.03003	-0.823162	0.583354	-1.41109	0.158219	0.492238	iRBD/Ctrl	MG
o__Pseudomonadales	ord	34.0269	0.815971	0.944028	0.864351	0.387395	0.638063	iRBD/Ctrl	MG
o__Rhodospirillales	ord	72.6255	1.32682	1.11842	1.18633	0.235492	0.509187	iRBD/Ctrl	MG
o__Tissierellales	ord	0.716303	0.0922987	0.739569	0.124801	0.900681	0.969965	iRBD/Ctrl	MG
o__Veillonellales	ord	136.631	0.392838	0.653975	0.600693	#N/A	#N/A	iRBD/Ctrl	MG
o__Verrucomicrobiales	ord	132.28	1.51059	0.662597	2.27981	0.022619	0.158333	iRBD/Ctrl	MG
o__Acidaminococcales	ord	61.2551	3.98865	0.989109	4.03257	5.5171e-05	0.00154479	PD/iRBD	MG
o__Actinobacteria order [Actinomycetales/Micrococcales]	ord	1.88543	0.546355	0.375965	1.45321	0.146166	0.325969	PD/iRBD	MG
o__Actinomycetales	ord	12.714	0.216428	0.279405	0.774605	0.438573	0.584764	PD/iRBD	MG
o__Bacillales	ord	24.7082	-1.12519	0.835853	-1.34615	0.178253	0.332739	PD/iRBD	MG
o__Bacteria order incertae sedis	ord	65.1171	0.445868	0.562572	0.792552	0.428039	0.584764	PD/iRBD	MG
o__Bacteroidales	ord	2462.5	0.0853613	0.234282	0.364353	0.715595	0.801466	PD/iRBD	MG
o__Bifidobacteriales	ord	364.524	-0.72757	0.507086	-1.43481	0.151343	0.325969	PD/iRBD	MG
o__Burkholderiales	ord	69.7676	0.229699	0.278773	0.823963	0.40996	0.584764	PD/iRBD	MG
o__Clostridia order incertae sedis	ord	16.4709	-1.27775	0.699928	-1.82555	#N/A	#N/A	PD/iRBD	MG
o__Clostridiales	ord	8676.26	-0.281502	0.149773	-1.87953	0.0601722	0.210603	PD/iRBD	MG
o__Coriobacteriales	ord	280.17	0.323403	0.307289	1.05244	0.292599	0.481927	PD/iRBD	MG
o__Coriobacteriia order incertae sedis	ord	4.16426	1.04392	0.67349	1.55002	0.121137	0.308349	PD/iRBD	MG
o__Desulfovibrionales	ord	34.3439	0.820212	0.401707	2.04182	0.0411696	0.192125	PD/iRBD	MG
o__Eggerthellales	ord	158.333	-0.201163	0.220355	-0.912903	0.361294	0.562012	PD/iRBD	MG
o__Enterobacterales	ord	99.4939	0.441497	0.714171	0.618196	0.536446	0.68275	PD/iRBD	MG
o__Erysipelotrichales	ord	129.646	1.18007	0.387145	3.04813	0.0023027	0.0214919	PD/iRBD	MG
o__Firmicutes order [Acidaminococcales/Lactobacillales]	ord	27.2978	-2.15507	1.21211	-1.77796	0.0754108	0.234611	PD/iRBD	MG
o__Firmicutes order [Clostridiales/Erysipelotrichales]	ord	22.9713	-3.07355	0.610261	-5.03645	#N/A	#N/A	PD/iRBD	MG
o__Firmicutes order [Clostridiales/Lactobacillales]	ord	35.4914	0.00986412	1.00048	0.00985938	0.992133	0.992133	PD/iRBD	MG
o__Firmicutes order incertae sedis	ord	235.417	-0.420111	0.370445	-1.13407	0.256765	0.449338	PD/iRBD	MG
o__Lactobacillales	ord	93.712	1.19177	0.436669	2.72923	0.00634831	0.0444382	PD/iRBD	MG
o__Lentisphaerae order incertae sedis	ord	4.59826	0.282553	0.720927	0.391931	0.695109	0.801466	PD/iRBD	MG
o__Methanobacteriales	ord	41.0187	-0.28086	1.0243	-0.274197	0.783933	0.844235	PD/iRBD	MG
o__Micrococcales	ord	2.17155	-0.666274	0.424454	-1.56972	0.116481	0.308349	PD/iRBD	MG
o__Pasteurellales	ord	1.8958	0.0826411	0.890825	0.0927691	0.926087	0.960386	PD/iRBD	MG
o__Propionibacteriales	ord	1.03003	1.18041	0.56068	2.10532	0.0352638	0.192125	PD/iRBD	MG
o__Pseudomonadales	ord	34.0269	-2.8656	0.931025	-3.0779	0.00208464	0.0214919	PD/iRBD	MG
o__Rhodospirillales	ord	72.6255	-2.10064	1.09762	-1.91381	0.0556438	0.210603	PD/iRBD	MG
o__Tissierellales	ord	0.716303	0.270555	0.715871	0.377938	0.705477	0.801466	PD/iRBD	MG
o__Veillonellales	ord	136.631	0.212162	0.641523	0.330716	#N/A	#N/A	PD/iRBD	MG
o__Verrucomicrobiales	ord	132.28	-0.894864	0.649917	-1.37689	0.168547	0.332739	PD/iRBD	MG
f__Acidaminococcaceae	fam	60.6278	-1.05174	0.79494	-1.32304	0.185822	0.578912	Case/Ctrl	MG
f__Actinobacteria fam. [Sanguibacteraceae/Actinomycetaceae/Promicromonosporaceae]	fam	1.89504	0.221221	0.288063	0.76796	0.442511	0.722126	Case/Ctrl	MG
f__Actinomycetaceae	fam	13.0968	0.214639	0.22352	0.960269	0.33692	0.679056	Case/Ctrl	MG
f__Akkermansiaceae	fam	130.983	1.0837	0.50479	2.14684	0.0318064	0.24082	Case/Ctrl	MG
f__Atopobiaceae	fam	23.6129	1.11106	0.491296	2.26149	0.0237287	0.209603	Case/Ctrl	MG
f__Bacillales fam. incertae sedis	fam	0.59648	0.477019	0.503252	0.947873	0.343194	0.679056	Case/Ctrl	MG
f__Bacteria fam. incertae sedis	fam	60.4699	-0.354445	0.423217	-0.837502	0.40231	0.722126	Case/Ctrl	MG
f__Bacteroidaceae	fam	928.176	0.441142	0.254431	1.73383	0.0829477	0.48847	Case/Ctrl	MG
f__Bacteroidales fam. incertae sedis	fam	93.0932	0.725025	0.40334	1.79755	0.0722478	0.478641	Case/Ctrl	MG
f__Barnesiellaceae	fam	37.9172	0.390264	0.369342	1.05665	0.290674	0.669813	Case/Ctrl	MG
f__Bifidobacteriaceae	fam	364.365	0.125443	0.393304	0.318947	0.749767	0.962474	Case/Ctrl	MG
f__Christensenellaceae	fam	0.909352	-0.552209	0.386406	-1.42909	0.152978	0.578912	Case/Ctrl	MG
f__Clostridia fam. incertae sedis	fam	16.1212	-0.477513	0.545416	-0.875502	0.381301	0.721748	Case/Ctrl	MG
f__Clostridiaceae	fam	913.734	0.0950723	0.189758	0.501018	0.616358	0.870074	Case/Ctrl	MG
f__Clostridiales fam. [Clostridiaceae/Ruminococcaceae]	fam	31.263	0.446783	0.460507	0.970198	#N/A	#N/A	Case/Ctrl	MG
f__Clostridiales fam. [Eubacteriaceae/Clostridiaceae]	fam	55.3271	-1.18769	0.886528	-1.33971	0.180339	0.578912	Case/Ctrl	MG
f__Clostridiales fam. [Eubacteriaceae/Ruminococcaceae]	fam	5.01066	-0.462302	0.29023	-1.59288	0.111186	0.535714	Case/Ctrl	MG
f__Clostridiales fam. [Lachnospiraceae/Clostridiaceae]	fam	38.945	-0.391134	0.943925	-0.41437	#N/A	#N/A	Case/Ctrl	MG
f__Clostridiales fam. [Lachnospiraceae/Ruminococcaceae]	fam	26.6567	-0.566819	0.404647	-1.40078	0.161281	0.578912	Case/Ctrl	MG
f__Clostridiales fam. incertae sedis	fam	1804.09	0.0255177	0.156365	0.163193	0.870367	0.990976	Case/Ctrl	MG
f__Clostridiales Family XIII. Incertae Sedis	fam	27.6965	0.00276727	0.244668	0.0113103	0.990976	0.990976	Case/Ctrl	MG
f__Coriobacteriaceae	fam	259.565	-0.277716	0.240903	-1.15281	0.248988	0.628399	Case/Ctrl	MG
f__Coriobacteriia fam. incertae sedis	fam	4.29092	-0.288074	0.524694	-0.549032	0.582984	0.858282	Case/Ctrl	MG
f__Desulfovibrionaceae	fam	33.6336	-0.379414	0.308306	-1.23064	0.218458	0.578912	Case/Ctrl	MG
f__Eggerthellaceae	fam	156.559	0.0506424	0.167736	0.301918	0.762715	0.962474	Case/Ctrl	MG
f__Enterobacteriaceae	fam	91.9818	1.69219	0.564103	2.99979	0.00270164	0.0357967	Case/Ctrl	MG
f__Erysipelotrichaceae	fam	133.612	0.23317	0.308411	0.756039	0.449626	0.722126	Case/Ctrl	MG
f__Eubacteriaceae	fam	541.586	0.148702	0.244763	0.607534	0.543496	0.843189	Case/Ctrl	MG
f__Firmicutes fam. [Carnobacteriaceae/Acidaminococcaceae]	fam	26.1622	-0.0286441	0.949813	-0.0301576	0.975941	0.990976	Case/Ctrl	MG
f__Firmicutes fam. [Erysipelotrichaceae/Clostridiaceae]	fam	14.129	0.93168	0.864027	1.0783	0.280901	0.669813	Case/Ctrl	MG
f__Firmicutes fam. [Erysipelotrichaceae/Peptostreptococcaceae]	fam	1.67022	0.547552	0.425557	1.28667	0.198209	0.578912	Case/Ctrl	MG
f__Firmicutes fam. [Lachnospiraceae/Lactobacillaceae]	fam	35.7836	-0.265679	0.770396	-0.34486	0.7302	0.962474	Case/Ctrl	MG
f__Firmicutes fam. incertae sedis	fam	240.49	-0.115155	0.291884	-0.394522	0.693195	0.942035	Case/Ctrl	MG
f__Lachnospiraceae	fam	2089.04	-0.246054	0.151658	-1.62242	0.104714	0.535714	Case/Ctrl	MG
f__Lactobacillaceae	fam	29.1798	1.70034	0.52715	3.22554	0.00125737	0.0222135	Case/Ctrl	MG
f__Lentisphaerae fam. incertae sedis	fam	4.65896	0.0263721	0.562617	0.046874	0.962614	0.990976	Case/Ctrl	MG
f__Leuconostocaceae	fam	0.896508	-0.330667	0.562773	-0.587567	0.556823	0.843189	Case/Ctrl	MG
f__Methanobacteriaceae	fam	42.1881	1.16304	0.793297	1.46608	0.142627	0.578912	Case/Ctrl	MG
f__Micrococcaceae	fam	1.41091	0.317268	0.385089	0.823883	0.410006	0.722126	Case/Ctrl	MG
f__Moraxellaceae	fam	31.7926	-0.714637	0.758232	-0.942505	0.345934	0.679056	Case/Ctrl	MG
f__Odoribacteraceae	fam	13.0519	0.0507607	0.206734	0.245536	0.806041	0.990976	Case/Ctrl	MG
f__Oscillospiraceae	fam	188.579	0.0122042	0.199452	0.0611887	0.951209	0.990976	Case/Ctrl	MG
f__Oxalobacteraceae	fam	1.35386	0.0109283	0.503882	0.0216882	0.982697	0.990976	Case/Ctrl	MG
f__Pasteurellaceae	fam	1.78639	-0.845814	0.674368	-1.25423	0.209758	0.578912	Case/Ctrl	MG
f__Peptostreptococcaceae	fam	15.9512	0.289005	0.376851	0.766895	0.443144	0.722126	Case/Ctrl	MG
f__Prevotellaceae	fam	815.388	-1.39909	0.545814	-2.5633	0.0103682	0.109903	Case/Ctrl	MG
f__Propionibacteriaceae	fam	1.06214	0.0505632	0.431732	0.117117	0.906767	0.990976	Case/Ctrl	MG
f__Rhodospirillaceae	fam	45.0065	-0.0994296	0.88904	-0.111839	0.910951	0.990976	Case/Ctrl	MG
f__Rikenellaceae	fam	429.02	0.920774	0.264165	3.48561	0.000491022	0.0222135	Case/Ctrl	MG
f__Ruminococcaceae	fam	2674.73	-0.0174488	0.138289	-0.126177	0.899592	0.990976	Case/Ctrl	MG
f__Staphylococcaceae	fam	23.8036	2.96317	0.892537	3.31994	0.000900365	0.0222135	Case/Ctrl	MG
f__Streptococcaceae	fam	55.8977	0.0432986	0.330303	0.131088	0.895706	0.990976	Case/Ctrl	MG
f__Sutterellaceae	fam	64.1026	-0.13855	0.282504	-0.490434	0.623827	0.870074	Case/Ctrl	MG
f__Tannerellaceae	fam	82.634	0.31356	0.253369	1.23756	0.215878	0.578912	Case/Ctrl	MG
f__Veillonellaceae	fam	132.482	0.494402	0.490411	1.00814	0.313388	0.679056	Case/Ctrl	MG
f__Acidaminococcaceae	fam	60.6278	-0.150988	0.826152	-0.18276	0.854986	0.924781	PD/Ctrl	MG
f__Actinobacteria fam. [Sanguibacteraceae/Actinomycetaceae/Promicromonosporaceae]	fam	1.89504	0.416257	0.305714	1.36159	0.173328	0.517931	PD/Ctrl	MG
f__Actinomycetaceae	fam	13.0968	0.299413	0.243621	1.22901	0.219067	0.580528	PD/Ctrl	MG
f__Akkermansiaceae	fam	130.983	0.742248	0.548398	1.35348	0.175901	0.517931	PD/Ctrl	MG
f__Atopobiaceae	fam	23.6129	1.49584	0.524662	2.85105	0.00435747	0.0577365	PD/Ctrl	MG
f__Bacillales fam. incertae sedis	fam	0.59648	0.601152	0.546251	1.10051	0.271112	0.653133	PD/Ctrl	MG
f__Bacteria fam. incertae sedis	fam	60.4699	-0.218064	0.46149	-0.472523	0.636554	0.898607	PD/Ctrl	MG
f__Bacteroidaceae	fam	928.176	0.448257	0.278165	1.61148	0.107076	0.40536	PD/Ctrl	MG
f__Bacteroidales fam. incertae sedis	fam	93.0932	0.970211	0.436345	2.22349	0.0261825	0.174543	PD/Ctrl	MG
f__Barnesiellaceae	fam	37.9172	0.054883	0.400218	0.137133	0.890926	0.944382	PD/Ctrl	MG
f__Bifidobacteriaceae	fam	364.365	-0.0887807	0.428512	-0.207184	0.835866	0.924781	PD/Ctrl	MG
f__Christensenellaceae	fam	0.909352	-1.01371	0.443067	-2.28794	0.0221409	0.174543	PD/Ctrl	MG
f__Clostridia fam. incertae sedis	fam	16.1212	-0.971703	0.591925	-1.6416	0.100673	0.40536	PD/Ctrl	MG
f__Clostridiaceae	fam	913.734	0.0393965	0.207443	0.189915	0.849376	0.924781	PD/Ctrl	MG
f__Clostridiales fam. [Clostridiaceae/Ruminococcaceae]	fam	31.263	0.456818	0.503264	0.907711	#N/A	#N/A	PD/Ctrl	MG
f__Clostridiales fam. [Eubacteriaceae/Clostridiaceae]	fam	55.3271	-1.58977	0.962096	-1.6524	0.0984524	0.40536	PD/Ctrl	MG
f__Clostridiales fam. [Eubacteriaceae/Ruminococcaceae]	fam	5.01066	-0.446957	0.31942	-1.39928	0.16173	0.517931	PD/Ctrl	MG
f__Clostridiales fam. [Lachnospiraceae/Clostridiaceae]	fam	38.945	-0.509158	1.03152	-0.493601	0.621588	0.898607	PD/Ctrl	MG
f__Clostridiales fam. [Lachnospiraceae/Ruminococcaceae]	fam	26.6567	-0.623504	0.443508	-1.40585	0.15977	0.517931	PD/Ctrl	MG
f__Clostridiales fam. incertae sedis	fam	1804.09	-0.0457998	0.170481	-0.268651	0.788198	0.924781	PD/Ctrl	MG
f__Clostridiales Family XIII. Incertae Sedis	fam	27.6965	0.151075	0.265616	0.56877	0.569512	0.898607	PD/Ctrl	MG
f__Coriobacteriaceae	fam	259.565	-0.20634	0.263313	-0.78363	0.433257	0.804941	PD/Ctrl	MG
f__Coriobacteriia fam. incertae sedis	fam	4.29092	-0.0413813	0.567342	-0.0729389	0.941855	0.964352	PD/Ctrl	MG
f__Desulfovibrionaceae	fam	33.6336	-0.0918073	0.330115	-0.278107	0.78093	0.924781	PD/Ctrl	MG
f__Eggerthellaceae	fam	156.559	-0.0041981	0.183601	-0.0228653	0.981758	0.981758	PD/Ctrl	MG
f__Enterobacteriaceae	fam	91.9818	1.86787	0.614194	3.04117	0.00235659	0.0416331	PD/Ctrl	MG
f__Erysipelotrichaceae	fam	133.612	0.584459	0.32736	1.78537	0.0742014	0.357516	PD/Ctrl	MG
f__Eubacteriaceae	fam	541.586	0.123638	0.26778	0.461717	0.644284	0.898607	PD/Ctrl	MG
f__Firmicutes fam. [Carnobacteriaceae/Acidaminococcaceae]	fam	26.1622	-0.957455	1.02253	-0.93636	0.349088	0.740067	PD/Ctrl	MG
f__Firmicutes fam. [Erysipelotrichaceae/Clostridiaceae]	fam	14.129	-0.434803	0.925975	-0.469563	#N/A	#N/A	PD/Ctrl	MG
f__Firmicutes fam. [Erysipelotrichaceae/Peptostreptococcaceae]	fam	1.67022	0.489576	0.463458	1.05636	0.290806	0.670118	PD/Ctrl	MG
f__Firmicutes fam. [Lachnospiraceae/Lactobacillaceae]	fam	35.7836	-0.201706	0.842436	-0.239431	0.810771	0.924781	PD/Ctrl	MG
f__Firmicutes fam. incertae sedis	fam	240.49	-0.203953	0.318861	-0.639631	0.522413	0.898607	PD/Ctrl	MG
f__Lachnospiraceae	fam	2089.04	-0.350644	0.164398	-2.1329	0.0329327	0.174543	PD/Ctrl	MG
f__Lactobacillaceae	fam	29.1798	2.14513	0.538824	3.98112	6.85909e-05	0.00363532	PD/Ctrl	MG
f__Lentisphaerae fam. incertae sedis	fam	4.65896	0.13807	0.615252	0.224412	0.822437	0.924781	PD/Ctrl	MG
f__Leuconostocaceae	fam	0.896508	-0.322065	0.617725	-0.521373	0.602107	0.898607	PD/Ctrl	MG
f__Methanobacteriaceae	fam	42.1881	1.1025	0.867409	1.27103	0.203718	0.568265	PD/Ctrl	MG
f__Micrococcaceae	fam	1.41091	0.224285	0.423031	0.530187	0.595982	0.898607	PD/Ctrl	MG
f__Moraxellaceae	fam	31.7926	-1.88046	0.814582	-2.30849	0.0209718	0.174543	PD/Ctrl	MG
f__Odoribacteraceae	fam	13.0519	-0.0420925	0.226557	-0.185792	0.852608	0.924781	PD/Ctrl	MG
f__Oscillospiraceae	fam	188.579	0.136944	0.216448	0.632687	0.526938	0.898607	PD/Ctrl	MG
f__Oxalobacteraceae	fam	1.35386	-0.294531	0.556346	-0.529402	0.596527	0.898607	PD/Ctrl	MG
f__Pasteurellaceae	fam	1.78639	-0.817769	0.740221	-1.10476	0.269262	0.653133	PD/Ctrl	MG
f__Peptostreptococcaceae	fam	15.9512	0.318101	0.412341	0.771452	0.440439	0.804941	PD/Ctrl	MG
f__Prevotellaceae	fam	815.388	-1.29146	0.594753	-2.17142	0.0298996	0.174543	PD/Ctrl	MG
f__Propionibacteriaceae	fam	1.06214	0.395159	0.451608	0.875004	0.381572	0.777819	PD/Ctrl	MG
f__Rhodospirillaceae	fam	45.0065	-0.333264	0.969239	-0.34384	0.730966	0.924781	PD/Ctrl	MG
f__Rikenellaceae	fam	429.02	0.91486	0.288987	3.16575	0.00154686	0.0409918	PD/Ctrl	MG
f__Ruminococcaceae	fam	2674.73	-0.0509545	0.151098	-0.337228	0.735945	0.924781	PD/Ctrl	MG
f__Staphylococcaceae	fam	23.8036	2.09053	0.962708	2.17151	0.0298923	0.174543	PD/Ctrl	MG
f__Streptococcaceae	fam	55.8977	0.0892774	0.361346	0.247069	0.804855	0.924781	PD/Ctrl	MG
f__Sutterellaceae	fam	64.1026	0.0207549	0.307323	0.0675344	0.946156	0.964352	PD/Ctrl	MG
f__Tannerellaceae	fam	82.634	0.225364	0.277	0.813588	0.415881	0.804941	PD/Ctrl	MG
f__Veillonellaceae	fam	132.482	0.532225	0.535472	0.993936	0.320254	0.707227	PD/Ctrl	MG
f__Acidaminococcaceae	fam	60.6278	-3.97945	1.00671	-3.95292	7.72041e-05	0.00409182	iRBD/Ctrl	MG
f__Actinobacteria fam. [Sanguibacteraceae/Actinomycetaceae/Promicromonosporaceae]	fam	1.89504	-0.252488	0.38762	-0.651381	0.514801	0.790926	iRBD/Ctrl	MG
f__Actinomycetaceae	fam	13.0968	0.0196934	0.29509	0.0667369	0.946791	0.964999	iRBD/Ctrl	MG
f__Akkermansiaceae	fam	130.983	1.55219	0.664173	2.33702	0.0194379	0.171701	iRBD/Ctrl	MG
f__Atopobiaceae	fam	23.6129	-0.0771455	0.638178	-0.120884	0.903783	0.939225	iRBD/Ctrl	MG
f__Bacillales fam. incertae sedis	fam	0.59648	0.20035	0.654051	0.306321	0.75936	0.939225	iRBD/Ctrl	MG
f__Bacteria fam. incertae sedis	fam	60.4699	-0.757696	0.559045	-1.35534	0.175309	0.593798	iRBD/Ctrl	MG
f__Bacteroidaceae	fam	928.176	0.426445	0.336999	1.26542	0.205722	0.605736	iRBD/Ctrl	MG
f__Bacteroidales fam. incertae sedis	fam	93.0932	0.0732916	0.528875	0.13858	0.889782	0.939225	iRBD/Ctrl	MG
f__Barnesiellaceae	fam	37.9172	0.887481	0.483725	1.83468	0.0665529	0.440913	iRBD/Ctrl	MG
f__Bifidobacteriaceae	fam	364.365	0.390718	0.519031	0.752783	0.45158	0.772056	iRBD/Ctrl	MG
f__Christensenellaceae	fam	0.909352	0.0193645	0.477887	0.0405211	0.967678	0.967678	iRBD/Ctrl	MG
f__Clostridia fam. incertae sedis	fam	16.1212	0.214538	0.715171	0.299981	0.764191	0.939225	iRBD/Ctrl	MG
f__Clostridiaceae	fam	913.734	0.197042	0.251272	0.784175	0.432937	0.772056	iRBD/Ctrl	MG
f__Clostridiales fam. [Clostridiaceae/Ruminococcaceae]	fam	31.263	0.436498	0.611439	0.713886	#N/A	#N/A	iRBD/Ctrl	MG
f__Clostridiales fam. [Eubacteriaceae/Clostridiaceae]	fam	55.3271	-0.271916	1.16485	-0.233435	0.815424	0.939225	iRBD/Ctrl	MG
f__Clostridiales fam. [Eubacteriaceae/Ruminococcaceae]	fam	5.01066	-0.50208	0.383498	-1.30921	0.190464	0.593798	iRBD/Ctrl	MG
f__Clostridiales fam. [Lachnospiraceae/Clostridiaceae]	fam	38.945	-0.153622	1.24936	-0.122961	0.902138	0.939225	iRBD/Ctrl	MG
f__Clostridiales fam. [Lachnospiraceae/Ruminococcaceae]	fam	26.6567	-0.465709	0.535504	-0.869666	0.384483	0.772056	iRBD/Ctrl	MG
f__Clostridiales fam. incertae sedis	fam	1804.09	0.158386	0.206511	0.766962	0.443104	0.772056	iRBD/Ctrl	MG
f__Clostridiales Family XIII. Incertae Sedis	fam	27.6965	-0.353361	0.322075	-1.09714	0.27258	0.654552	iRBD/Ctrl	MG
f__Coriobacteriaceae	fam	259.565	-0.431309	0.318974	-1.35217	0.176319	0.593798	iRBD/Ctrl	MG
f__Coriobacteriia fam. incertae sedis	fam	4.29092	-0.924838	0.695907	-1.32897	0.183859	0.593798	iRBD/Ctrl	MG
f__Desulfovibrionaceae	fam	33.6336	-1.06706	0.401663	-2.65661	0.007893	0.104582	iRBD/Ctrl	MG
f__Eggerthellaceae	fam	156.559	0.148021	0.222169	0.666254	0.505249	0.790926	iRBD/Ctrl	MG
f__Enterobacteriaceae	fam	91.9818	1.22144	0.744734	1.64011	0.100983	0.535209	iRBD/Ctrl	MG
f__Erysipelotrichaceae	fam	133.612	-0.695591	0.396968	-1.75226	0.0797288	0.469514	iRBD/Ctrl	MG
f__Eubacteriaceae	fam	541.586	0.200135	0.324367	0.617003	0.537233	0.790926	iRBD/Ctrl	MG
f__Firmicutes fam. [Carnobacteriaceae/Acidaminococcaceae]	fam	26.1622	0.989072	1.23722	0.799434	0.424039	0.772056	iRBD/Ctrl	MG
f__Firmicutes fam. [Erysipelotrichaceae/Clostridiaceae]	fam	14.129	1.72777	1.11882	1.54428	#N/A	#N/A	iRBD/Ctrl	MG
f__Firmicutes fam. [Erysipelotrichaceae/Peptostreptococcaceae]	fam	1.67022	0.632127	0.553552	1.14195	0.253476	0.654552	iRBD/Ctrl	MG
f__Firmicutes fam. [Lachnospiraceae/Lactobacillaceae]	fam	35.7836	-0.411094	1.02075	-0.402736	0.687143	0.910464	iRBD/Ctrl	MG
f__Firmicutes fam. incertae sedis	fam	240.49	0.0485093	0.386158	0.12562	0.900033	0.939225	iRBD/Ctrl	MG
f__Lachnospiraceae	fam	2089.04	-0.0442235	0.199129	-0.222085	0.824248	0.939225	iRBD/Ctrl	MG
f__Lactobacillaceae	fam	29.1798	-1.25071	0.664219	-1.88297	0.0597041	0.440913	iRBD/Ctrl	MG
f__Lentisphaerae fam. incertae sedis	fam	4.65896	-0.143469	0.740357	-0.193783	0.846346	0.939225	iRBD/Ctrl	MG
f__Leuconostocaceae	fam	0.896508	-0.348829	0.752848	-0.463345	0.643117	0.902301	iRBD/Ctrl	MG
f__Methanobacteriaceae	fam	42.1881	1.25904	1.05065	1.19835	0.230782	0.643761	iRBD/Ctrl	MG
f__Micrococcaceae	fam	1.41091	0.529976	0.500471	1.05895	0.289621	0.654552	iRBD/Ctrl	MG
f__Moraxellaceae	fam	31.7926	0.620377	0.981221	0.632249	0.527224	0.790926	iRBD/Ctrl	MG
f__Odoribacteraceae	fam	13.0519	0.244118	0.271534	0.899031	0.368636	0.772056	iRBD/Ctrl	MG
f__Oscillospiraceae	fam	188.579	-0.279573	0.262283	-1.06592	0.286458	0.654552	iRBD/Ctrl	MG
f__Oxalobacteraceae	fam	1.35386	0.496548	0.63585	0.78092	0.434849	0.772056	iRBD/Ctrl	MG
f__Pasteurellaceae	fam	1.78639	-0.93621	0.896597	-1.04418	0.296401	0.654552	iRBD/Ctrl	MG
f__Peptostreptococcaceae	fam	15.9512	0.228425	0.498715	0.458027	0.646933	0.902301	iRBD/Ctrl	MG
f__Prevotellaceae	fam	815.388	-1.76481	0.72052	-2.44936	0.0143111	0.151698	iRBD/Ctrl	MG
f__Propionibacteriaceae	fam	1.06214	-0.779262	0.580084	-1.34336	0.179155	0.593798	iRBD/Ctrl	MG
f__Rhodospirillaceae	fam	45.0065	0.506482	1.17377	0.431502	0.666103	0.905217	iRBD/Ctrl	MG
f__Rikenellaceae	fam	429.02	0.931018	0.350081	2.65943	0.00782722	0.104582	iRBD/Ctrl	MG
f__Ruminococcaceae	fam	2674.73	0.0500428	0.183034	0.273407	0.78454	0.939225	iRBD/Ctrl	MG
f__Staphylococcaceae	fam	23.8036	3.68203	1.1648	3.16109	0.00157181	0.0416529	iRBD/Ctrl	MG
f__Streptococcaceae	fam	55.8977	-0.0592052	0.437708	-0.135262	0.892405	0.939225	iRBD/Ctrl	MG
f__Sutterellaceae	fam	64.1026	-0.488139	0.37227	-1.31125	0.189773	0.593798	iRBD/Ctrl	MG
f__Tannerellaceae	fam	82.634	0.464553	0.335136	1.38616	0.165697	0.593798	iRBD/Ctrl	MG
f__Veillonellaceae	fam	132.482	0.413991	0.648548	0.638335	0.523256	0.790926	iRBD/Ctrl	MG
f__Acidaminococcaceae	fam	60.6278	3.82846	0.987722	3.87605	0.000106165	0.00281336	PD/iRBD	MG
f__Actinobacteria fam. [Sanguibacteraceae/Actinomycetaceae/Promicromonosporaceae]	fam	1.89504	0.668745	0.368905	1.81278	0.0698655	0.386975	PD/iRBD	MG
f__Actinomycetaceae	fam	13.0968	0.279719	0.28752	0.972868	0.330619	0.673954	PD/iRBD	MG
f__Akkermansiaceae	fam	130.983	-0.809941	0.651429	-1.24333	0.213746	0.539455	PD/iRBD	MG
f__Atopobiaceae	fam	23.6129	1.57298	0.624364	2.51934	0.0117575	0.117947	PD/iRBD	MG
f__Bacillales fam. incertae sedis	fam	0.59648	0.400803	0.620504	0.64593	0.518325	0.755859	PD/iRBD	MG
f__Bacteria fam. incertae sedis	fam	60.4699	0.539631	0.548472	0.983881	0.325174	0.673954	PD/iRBD	MG
f__Bacteroidaceae	fam	928.176	0.0218119	0.33063	0.0659706	0.947401	0.971364	PD/iRBD	MG
f__Bacteroidales fam. incertae sedis	fam	93.0932	0.89692	0.518568	1.72961	0.0837003	0.386975	PD/iRBD	MG
f__Barnesiellaceae	fam	37.9172	-0.832598	0.474343	-1.75527	0.0792139	0.386975	PD/iRBD	MG
f__Bifidobacteriaceae	fam	364.365	-0.479499	0.50926	-0.941559	0.346418	0.680007	PD/iRBD	MG
f__Christensenellaceae	fam	0.909352	-1.03308	0.502658	-2.05522	0.0398573	0.264055	PD/iRBD	MG
f__Clostridia fam. incertae sedis	fam	16.1212	-1.18624	0.704981	-1.68266	0.0924416	0.386975	PD/iRBD	MG
f__Clostridiaceae	fam	913.734	-0.157645	0.24653	-0.639455	0.522527	0.755859	PD/iRBD	MG
f__Clostridiales fam. [Clostridiaceae/Ruminococcaceae]	fam	31.263	0.0203209	0.599468	0.0338982	#N/A	#N/A	PD/iRBD	MG
f__Clostridiales fam. [Eubacteriaceae/Clostridiaceae]	fam	55.3271	-1.31785	1.14341	-1.15257	0.249088	0.600076	PD/iRBD	MG
f__Clostridiales fam. [Eubacteriaceae/Ruminococcaceae]	fam	5.01066	0.0551227	0.377969	0.145839	0.884048	0.947778	PD/iRBD	MG
f__Clostridiales fam. [Lachnospiraceae/Clostridiaceae]	fam	38.945	-0.355536	1.22603	-0.289989	0.771825	0.947778	PD/iRBD	MG
f__Clostridiales fam. [Lachnospiraceae/Ruminococcaceae]	fam	26.6567	-0.157795	0.525831	-0.300087	0.764111	0.947778	PD/iRBD	MG
f__Clostridiales fam. incertae sedis	fam	1804.09	-0.204186	0.202625	-1.0077	0.313597	0.673954	PD/iRBD	MG
f__Clostridiales Family XIII. Incertae Sedis	fam	27.6965	0.504436	0.3156	1.59834	0.109968	0.386975	PD/iRBD	MG
f__Coriobacteriaceae	fam	259.565	0.224969	0.312971	0.718818	0.472253	0.755859	PD/iRBD	MG
f__Coriobacteriia fam. incertae sedis	fam	4.29092	0.883456	0.682162	1.29508	0.195292	0.539455	PD/iRBD	MG
f__Desulfovibrionaceae	fam	33.6336	0.975256	0.394166	2.47423	0.0133525	0.117947	PD/iRBD	MG
f__Eggerthellaceae	fam	156.559	-0.152219	0.217888	-0.69861	0.484796	0.755859	PD/iRBD	MG
f__Enterobacteriaceae	fam	91.9818	0.646428	0.730405	0.885027	0.376142	0.711984	PD/iRBD	MG
f__Erysipelotrichaceae	fam	133.612	1.28005	0.389283	3.28823	0.00100821	0.0178117	PD/iRBD	MG
f__Eubacteriaceae	fam	541.586	-0.0764967	0.318244	-0.240371	0.810042	0.947778	PD/iRBD	MG
f__Firmicutes fam. [Carnobacteriaceae/Acidaminococcaceae]	fam	26.1622	-1.94653	1.21463	-1.60257	0.109029	0.386975	PD/iRBD	MG
f__Firmicutes fam. [Erysipelotrichaceae/Clostridiaceae]	fam	14.129	-2.16258	1.09851	-1.96865	#N/A	#N/A	PD/iRBD	MG
f__Firmicutes fam. [Erysipelotrichaceae/Peptostreptococcaceae]	fam	1.67022	-0.142551	0.530605	-0.268657	0.788194	0.947778	PD/iRBD	MG
f__Firmicutes fam. [Lachnospiraceae/Lactobacillaceae]	fam	35.7836	0.209388	1.00162	0.209049	0.83441	0.947778	PD/iRBD	MG
f__Firmicutes fam. incertae sedis	fam	240.49	-0.252463	0.378907	-0.666293	0.505224	0.755859	PD/iRBD	MG
f__Lachnospiraceae	fam	2089.04	-0.306421	0.19539	-1.56825	0.116823	0.386975	PD/iRBD	MG
f__Lactobacillaceae	fam	29.1798	3.39583	0.648554	5.236	1.64095e-07	8.69702e-06	PD/iRBD	MG
f__Lentisphaerae fam. incertae sedis	fam	4.65896	0.281538	0.724194	0.388761	0.697453	0.947778	PD/iRBD	MG
f__Leuconostocaceae	fam	0.896508	0.0267637	0.745548	0.035898	0.971364	0.971364	PD/iRBD	MG
f__Methanobacteriaceae	fam	42.1881	-0.156541	1.03031	-0.151936	0.879238	0.947778	PD/iRBD	MG
f__Micrococcaceae	fam	1.41091	-0.305691	0.484025	-0.631559	0.527675	0.755859	PD/iRBD	MG
f__Moraxellaceae	fam	31.7926	-2.50083	0.966544	-2.5874	0.00967039	0.117947	PD/iRBD	MG
f__Odoribacteraceae	fam	13.0519	-0.28621	0.266009	-1.07594	0.281953	0.649717	PD/iRBD	MG
f__Oscillospiraceae	fam	188.579	0.416517	0.257253	1.6191	0.105426	0.386975	PD/iRBD	MG
f__Oxalobacteraceae	fam	1.35386	-0.791079	0.62471	-1.26631	0.205401	0.539455	PD/iRBD	MG
f__Pasteurellaceae	fam	1.78639	0.118441	0.89	0.13308	0.89413	0.947778	PD/iRBD	MG
f__Peptostreptococcaceae	fam	15.9512	0.0896761	0.488359	0.183627	0.854306	0.947778	PD/iRBD	MG
f__Prevotellaceae	fam	815.388	0.473353	0.706998	0.669526	0.50316	0.755859	PD/iRBD	MG
f__Propionibacteriaceae	fam	1.06214	1.17442	0.556457	2.11053	0.0348123	0.263579	PD/iRBD	MG
f__Rhodospirillaceae	fam	45.0065	-0.839746	1.15175	-0.729103	0.465938	0.755859	PD/iRBD	MG
f__Rikenellaceae	fam	429.02	-0.0161574	0.343352	-0.0470578	0.962467	0.971364	PD/iRBD	MG
f__Ruminococcaceae	fam	2674.73	-0.100997	0.179587	-0.562385	0.573854	0.800375	PD/iRBD	MG
f__Staphylococcaceae	fam	23.8036	-1.5915	1.13844	-1.39796	0.162124	0.48089	PD/iRBD	MG
f__Streptococcaceae	fam	55.8977	0.148483	0.429335	0.345843	0.729461	0.947778	PD/iRBD	MG
f__Sutterellaceae	fam	64.1026	0.508894	0.365063	1.39399	0.163321	0.48089	PD/iRBD	MG
f__Tannerellaceae	fam	82.634	-0.23919	0.32854	-0.728038	0.46659	0.755859	PD/iRBD	MG
f__Veillonellaceae	fam	132.482	0.118234	0.636197	0.185845	0.852566	0.947778	PD/iRBD	MG
g__Acinetobacter	gen	30.4681	-0.915783	0.754694	-1.21345	0.224958	0.735896	Case/Ctrl	MG
g__Actinobacteria gen. [Xylanimonas/Schaalia/Sanguibacter]	gen	1.91081	0.26438	0.292935	0.902522	0.36678	0.804119	Case/Ctrl	MG
g__Actinomyces	gen	12.1107	0.33832	0.223045	1.51682	0.129311	0.578072	Case/Ctrl	MG
g__Adlercreutzia	gen	7.22705	-0.343214	0.362573	-0.946606	0.343839	0.804119	Case/Ctrl	MG
g__Akkermansia	gen	127.773	1.03374	0.501182	2.0626	0.0391508	0.378239	Case/Ctrl	MG
g__Alistipes	gen	412.837	1.01015	0.264956	3.81254	0.000137548	0.00673986	Case/Ctrl	MG
g__Anaeromassilibacillus	gen	3.86562	0.607581	0.339622	1.78899	0.0736167	0.515317	Case/Ctrl	MG
g__Anaerostipes	gen	173.054	0.212181	0.310167	0.684084	0.493922	0.834558	Case/Ctrl	MG
g__Anaerotruncus	gen	9.16219	1.62142	0.394675	4.10824	#N/A	#N/A	Case/Ctrl	MG
g__Atopobiaceae gen. incertae sedis	gen	5.52043	0.192991	0.57431	0.33604	0.73684	0.870004	Case/Ctrl	MG
g__Atopobium	gen	0.696727	-0.188286	0.483132	-0.389719	0.696744	0.870004	Case/Ctrl	MG
g__Azospirillum	gen	43.9306	0.270653	0.913961	0.296132	0.76713	0.870255	Case/Ctrl	MG
g__Bacteria gen. incertae sedis	gen	60.5244	-0.348585	0.424531	-0.821105	0.411587	0.804119	Case/Ctrl	MG
g__Bacteroidales gen. incertae sedis	gen	96.4458	0.76552	0.407895	1.87676	0.0605513	0.476363	Case/Ctrl	MG
g__Bacteroides	gen	845.927	0.399499	0.241821	1.65205	0.0985247	0.578072	Case/Ctrl	MG
g__Barnesiella	gen	35.0855	0.349579	0.405421	0.862262	0.388544	0.804119	Case/Ctrl	MG
g__Bifidobacterium	gen	372.334	0.0604275	0.399298	0.151334	0.879712	0.927008	Case/Ctrl	MG
g__Bilophila	gen	13.0624	0.170863	0.372256	0.458992	0.64624	0.870004	Case/Ctrl	MG
g__Bittarella	gen	1.54143	-0.208277	0.240925	-0.864488	0.38732	0.804119	Case/Ctrl	MG
g__Blautia	gen	520.22	-0.144082	0.172799	-0.833812	0.404387	0.804119	Case/Ctrl	MG
g__Butyricicoccus	gen	41.8105	-0.0606093	0.232863	-0.260279	0.794649	0.875007	Case/Ctrl	MG
g__Christensenella	gen	0.833961	-0.136121	0.389646	-0.349347	0.726829	0.870004	Case/Ctrl	MG
g__Clostridia gen. incertae sedis	gen	17.423	-0.448013	0.553733	-0.809078	0.41847	0.804119	Case/Ctrl	MG
g__Clostridiaceae gen. incertae sedis	gen	7.96727	0.258437	0.478645	0.539934	0.589243	0.870004	Case/Ctrl	MG
g__Clostridiales Family XIII. Incertae Sedis gen. incertae sedis	gen	27.1226	-0.0480923	0.263539	-0.182486	0.855201	0.920986	Case/Ctrl	MG
g__Clostridiales gen. [Clostridium/Eubacterium]	gen	57.0454	-1.39196	0.883256	-1.57594	0.11504	0.578072	Case/Ctrl	MG
g__Clostridiales gen. [Clostridium/Flavonifractor]	gen	3.7914	0.319234	0.303406	1.05217	0.292724	0.774345	Case/Ctrl	MG
g__Clostridiales gen. [Ruminococcus/Blautia]	gen	24.5741	-0.762191	0.493662	-1.54395	0.1226	0.578072	Case/Ctrl	MG
g__Clostridiales gen. [Ruminococcus/Clostridium]	gen	25.5388	0.317192	0.781879	0.40568	#N/A	#N/A	Case/Ctrl	MG
g__Clostridiales gen. [Ruminococcus/Eubacterium]	gen	5.0044	-0.334647	0.294404	-1.13669	0.255667	0.736922	Case/Ctrl	MG
g__Clostridiales gen. incertae sedis	gen	1839.37	0.0672601	0.165706	0.4059	0.684816	0.870004	Case/Ctrl	MG
g__Clostridium	gen	897.441	0.11462	0.219388	0.522454	0.601354	0.870004	Case/Ctrl	MG
g__Collinsella	gen	253.888	-0.218917	0.283037	-0.773459	0.439251	0.810293	Case/Ctrl	MG
g__Coprobacillus	gen	11.743	-1.94131	0.875121	-2.21834	#N/A	#N/A	Case/Ctrl	MG
g__Coprobacter	gen	2.67506	1.59027	0.561114	2.83414	0.00459498	0.0750514	Case/Ctrl	MG
g__Coprococcus	gen	133.757	0.189063	0.33453	0.565159	0.571966	0.870004	Case/Ctrl	MG
g__Coriobacteriaceae gen. incertae sedis	gen	2.64318	0.213594	0.555778	0.384314	0.700745	0.870004	Case/Ctrl	MG
g__Coriobacteriia gen. incertae sedis	gen	4.50799	-0.259749	0.536211	-0.484415	0.628092	0.870004	Case/Ctrl	MG
g__Desulfovibrio	gen	19.3274	-0.542922	0.53275	-1.0191	0.308158	0.774345	Case/Ctrl	MG
g__Dialister	gen	114.493	0.610354	0.753055	0.810503	0.417651	0.804119	Case/Ctrl	MG
g__Dorea	gen	121.339	-0.26897	0.197581	-1.36132	0.173414	0.653637	Case/Ctrl	MG
g__Eggerthella	gen	55.5366	0.155242	0.331093	0.468877	0.639158	0.870004	Case/Ctrl	MG
g__Eggerthellaceae gen. incertae sedis	gen	90.4294	0.104919	0.214771	0.488517	0.625184	0.870004	Case/Ctrl	MG
g__Eisenbergiella	gen	1.84461	1.03962	0.512372	2.02903	0.0424555	0.378239	Case/Ctrl	MG
g__Erysipelatoclostridium	gen	5.92401	-0.196519	0.457893	-0.42918	0.667792	0.870004	Case/Ctrl	MG
g__Erysipelotrichaceae gen. incertae sedis	gen	20.8964	1.38909	0.427277	3.25102	0.0011499	0.0281727	Case/Ctrl	MG
g__Escherichia	gen	80.4089	2.3957	0.621525	3.85455	0.000115945	0.00673986	Case/Ctrl	MG
g__Eubacteriaceae gen. incertae sedis	gen	1.03792	-0.279946	0.453257	-0.617632	0.536818	0.870004	Case/Ctrl	MG
g__Eubacterium	gen	541.697	0.268952	0.245907	1.09371	0.27408	0.767424	Case/Ctrl	MG
g__Faecalibacterium	gen	1089.75	-0.153868	0.223722	-0.687763	0.491602	0.834558	Case/Ctrl	MG
g__Faecalicatena	gen	1.68795	2.04985	0.429774	4.7696	#N/A	#N/A	Case/Ctrl	MG
g__Firmicutes gen. [Carnobacterium/Phascolarctobacterium]	gen	25.5078	0.0183306	0.944162	0.0194147	0.98451	0.98451	Case/Ctrl	MG
g__Firmicutes gen. [Coprobacillus/Clostridium]	gen	13.1071	0.914423	0.853487	1.0714	0.283991	0.773088	Case/Ctrl	MG
g__Firmicutes gen. [Erysipelatoclostridium/Clostridioides]	gen	1.47061	0.490119	0.404181	1.21262	0.225274	0.735896	Case/Ctrl	MG
g__Firmicutes gen. [Lactobacillus/Lachnospira]	gen	33.3706	-0.220279	0.762182	-0.289011	0.772573	0.870255	Case/Ctrl	MG
g__Firmicutes gen. incertae sedis	gen	250.223	-0.0873891	0.300098	-0.291202	0.770897	0.870255	Case/Ctrl	MG
g__Flavonifractor	gen	20.969	0.130939	0.250595	0.522511	0.601314	0.870004	Case/Ctrl	MG
g__Fusicatenibacter	gen	30.3743	-0.889611	0.774909	-1.14802	0.25096	0.736922	Case/Ctrl	MG
g__Gemella	gen	0.529356	0.370499	0.468895	0.790153	0.429439	0.809327	Case/Ctrl	MG
g__Haemophilus	gen	1.36512	-0.919001	0.611411	-1.50308	0.132818	0.578072	Case/Ctrl	MG
g__Holdemanella	gen	86.6184	0.318687	0.742006	0.429493	0.667564	0.870004	Case/Ctrl	MG
g__Holdemania	gen	2.86503	0.165935	0.250971	0.66117	0.508504	0.844633	Case/Ctrl	MG
g__Hungatella	gen	1.0515	0.734211	0.461331	1.59151	0.111496	0.578072	Case/Ctrl	MG
g__Intestinibacter	gen	6.23522	0.0560223	0.457813	0.122369	0.902607	0.940295	Case/Ctrl	MG
g__Intestinimonas	gen	3.47819	0.438163	0.3551	1.23392	0.217234	0.735896	Case/Ctrl	MG
g__Lachnoclostridium	gen	14.54	0.588829	0.394628	1.49211	0.13567	0.578072	Case/Ctrl	MG
g__Lachnospiraceae gen. incertae sedis	gen	565.586	-0.0825389	0.23088	-0.357497	0.72072	0.870004	Case/Ctrl	MG
g__Lactobacillus	gen	31.1372	1.85369	0.534578	3.46757	0.000525195	0.0171564	Case/Ctrl	MG
g__Lactococcus	gen	5.51608	-0.188862	0.472339	-0.399844	0.689272	0.870004	Case/Ctrl	MG
g__Lentisphaerae gen. incertae sedis	gen	4.85533	0.0895504	0.572675	0.156372	0.87574	0.927008	Case/Ctrl	MG
g__Leuconostoc	gen	0.691333	0.059896	0.538958	0.111133	0.911511	0.940295	Case/Ctrl	MG
g__Massilimaliae	gen	0.490296	0.415455	0.42351	0.980981	0.326602	0.800175	Case/Ctrl	MG
g__Massilioclostridium	gen	1.26814	0.1132	0.274719	0.412059	0.680296	0.870004	Case/Ctrl	MG
g__Methanobrevibacter	gen	42.6778	1.19592	0.829818	1.44119	0.149532	0.610588	Case/Ctrl	MG
g__Mogibacterium	gen	1.06523	0.516287	0.342938	1.50548	0.1322	0.578072	Case/Ctrl	MG
g__Odoribacter	gen	11.6932	0.0638928	0.207219	0.308335	0.757827	0.870255	Case/Ctrl	MG
g__Olsenella	gen	16.6001	2.64262	0.649953	4.06586	#N/A	#N/A	Case/Ctrl	MG
g__Oscillibacter	gen	194.655	0.0804709	0.2098	0.383559	0.701305	0.870004	Case/Ctrl	MG
g__Oxalobacteraceae gen. incertae sedis	gen	1.16027	-0.519392	0.557012	-0.932461	0.351098	0.804119	Case/Ctrl	MG
g__Parabacteroides	gen	83.4342	0.355334	0.256511	1.38525	0.165975	0.65062	Case/Ctrl	MG
g__Paraprevotella	gen	16.1842	1.00596	0.869215	1.15732	0.247142	0.736922	Case/Ctrl	MG
g__Parasutterella	gen	2.81261	0.466625	0.548231	0.851147	0.394688	0.804119	Case/Ctrl	MG
g__Peptostreptococcaceae gen. incertae sedis	gen	5.33425	0.028487	0.632402	0.0450457	0.964071	0.983805	Case/Ctrl	MG
g__Phascolarctobacterium	gen	38.5897	-1.06971	0.936982	-1.14165	0.2536	0.736922	Case/Ctrl	MG
g__Phocea	gen	0.957916	0.270435	0.375243	0.720694	0.471098	0.828961	Case/Ctrl	MG
g__Prevotella	gen	850.146	-1.38039	0.598759	-2.30542	0.0211429	0.259001	Case/Ctrl	MG
g__Propionibacterium	gen	0.871215	0.120065	0.456787	0.262846	0.792669	0.875007	Case/Ctrl	MG
g__Pseudoflavonifractor	gen	5.29171	-0.067307	0.324254	-0.207575	0.835561	0.909833	Case/Ctrl	MG
g__Rikenellaceae gen. [Tidjanibacter/Alistipes]	gen	12.6514	-0.587995	0.772374	-0.761283	0.446488	0.810293	Case/Ctrl	MG
g__Romboutsia	gen	4.91119	0.90345	0.434786	2.07792	0.037717	0.378239	Case/Ctrl	MG
g__Roseburia	gen	398.153	-0.462335	0.248856	-1.85784	0.0631911	0.476363	Case/Ctrl	MG
g__Rothia	gen	1.35892	0.337583	0.37525	0.899621	0.368322	0.804119	Case/Ctrl	MG
g__Ruminococcaceae gen. incertae sedis	gen	665.843	0.245523	0.194928	1.25956	0.207829	0.735896	Case/Ctrl	MG
g__Ruminococcus	gen	834.962	0.101562	0.292258	0.34751	0.728208	0.870004	Case/Ctrl	MG
g__Ruthenibacterium	gen	15.2041	0.854185	0.356653	2.395	0.0166202	0.232682	Case/Ctrl	MG
g__Senegalimassilia	gen	6.47483	-0.210314	0.572393	-0.367429	0.713299	0.870004	Case/Ctrl	MG
g__Staphylococcus	gen	25.2059	2.86051	0.938328	3.04852	0.00229971	0.0450742	Case/Ctrl	MG
g__Streptococcus	gen	47.4621	0.239275	0.333957	0.716485	0.473692	0.828961	Case/Ctrl	MG
g__Subdoligranulum	gen	23.5348	-0.429609	1.02507	-0.419101	0.675142	0.870004	Case/Ctrl	MG
g__Sutterella	gen	49.6513	-0.160552	0.469872	-0.341692	0.732583	0.870004	Case/Ctrl	MG
g__Sutterellaceae gen. incertae sedis	gen	6.7923	-0.0215356	0.654882	-0.0328847	0.973767	0.983805	Case/Ctrl	MG
g__Turicibacter	gen	1.02312	0.530995	0.519516	1.0221	0.306735	0.774345	Case/Ctrl	MG
g__Veillonella	gen	3.20578	0.704051	0.451606	1.55899	0.118998	0.578072	Case/Ctrl	MG
g__Acinetobacter	gen	30.4681	-2.0551	0.812527	-2.52927	0.0114301	0.271466	PD/Ctrl	MG
g__Actinobacteria gen. [Xylanimonas/Schaalia/Sanguibacter]	gen	1.91081	0.478532	0.309906	1.54412	0.122559	0.554435	PD/Ctrl	MG
g__Actinomyces	gen	12.1107	0.454802	0.241757	1.88124	0.0599391	0.474518	PD/Ctrl	MG
g__Adlercreutzia	gen	7.22705	-0.62697	0.395489	-1.5853	0.112898	0.554435	PD/Ctrl	MG
g__Akkermansia	gen	127.773	0.782635	0.546192	1.43289	0.151889	0.622013	PD/Ctrl	MG
g__Alistipes	gen	412.837	1.02006	0.289726	3.52078	0.00043028	0.0136255	PD/Ctrl	MG
g__Anaeromassilibacillus	gen	3.86562	0.367293	0.370695	0.990822	0.321772	0.727819	PD/Ctrl	MG
g__Anaerostipes	gen	173.054	-0.0534247	0.336157	-0.158928	0.873726	0.995555	PD/Ctrl	MG
g__Anaerotruncus	gen	9.16219	1.62509	0.429279	3.78562	#N/A	#N/A	PD/Ctrl	MG
g__Atopobiaceae gen. incertae sedis	gen	5.52043	0.228527	0.629153	0.36323	0.716433	0.932345	PD/Ctrl	MG
g__Atopobium	gen	0.696727	-0.27351	0.532646	-0.513494	0.607606	0.900813	PD/Ctrl	MG
g__Azospirillum	gen	43.9306	0.0252791	0.997797	0.0253349	0.979788	0.995555	PD/Ctrl	MG
g__Bacteria gen. incertae sedis	gen	60.5244	-0.220035	0.463052	-0.475185	0.634655	0.900813	PD/Ctrl	MG
g__Bacteroidales gen. incertae sedis	gen	96.4458	0.997552	0.441938	2.25722	0.0239943	0.395701	PD/Ctrl	MG
g__Bacteroides	gen	845.927	0.429856	0.264349	1.6261	0.103929	0.554435	PD/Ctrl	MG
g__Barnesiella	gen	35.0855	0.109095	0.441583	0.247055	0.804866	0.968037	PD/Ctrl	MG
g__Bifidobacterium	gen	372.334	-0.0482235	0.436036	-0.110595	0.911937	0.995555	PD/Ctrl	MG
g__Bilophila	gen	13.0624	0.28705	0.406139	0.706778	0.479705	0.82973	PD/Ctrl	MG
g__Bittarella	gen	1.54143	-0.393893	0.275322	-1.43066	0.152528	0.622013	PD/Ctrl	MG
g__Blautia	gen	520.22	-0.299009	0.18624	-1.6055	0.108383	0.554435	PD/Ctrl	MG
g__Butyricicoccus	gen	41.8105	-0.15463	0.254466	-0.607664	0.54341	0.846294	PD/Ctrl	MG
g__Christensenella	gen	0.833961	-0.570675	0.442899	-1.2885	0.197572	0.622013	PD/Ctrl	MG
g__Clostridia gen. incertae sedis	gen	17.423	-0.935308	0.601595	-1.55471	0.120014	0.554435	PD/Ctrl	MG
g__Clostridiaceae gen. incertae sedis	gen	7.96727	0.133598	0.523389	0.255255	#N/A	#N/A	PD/Ctrl	MG
g__Clostridiales Family XIII. Incertae Sedis gen. incertae sedis	gen	27.1226	0.150957	0.283841	0.531837	0.594839	0.900813	PD/Ctrl	MG
g__Clostridiales gen. [Clostridium/Eubacterium]	gen	57.0454	-1.73845	0.961675	-1.80773	0.0706491	0.5076	PD/Ctrl	MG
g__Clostridiales gen. [Clostridium/Flavonifractor]	gen	3.7914	-0.101994	0.326855	-0.312046	0.755005	0.95634	PD/Ctrl	MG
g__Clostridiales gen. [Ruminococcus/Blautia]	gen	24.5741	-0.755943	0.541011	-1.39728	0.16233	0.622013	PD/Ctrl	MG
g__Clostridiales gen. [Ruminococcus/Clostridium]	gen	25.5388	0.289043	0.855911	0.337702	#N/A	#N/A	PD/Ctrl	MG
g__Clostridiales gen. [Ruminococcus/Eubacterium]	gen	5.0044	-0.312908	0.323737	-0.96655	0.333769	0.731144	PD/Ctrl	MG
g__Clostridiales gen. incertae sedis	gen	1839.37	0.00800637	0.180906	0.0442572	0.964699	0.995555	PD/Ctrl	MG
g__Clostridium	gen	897.441	0.069572	0.239811	0.290112	0.771731	0.964663	PD/Ctrl	MG
g__Collinsella	gen	253.888	-0.158331	0.309406	-0.511727	0.608842	0.900813	PD/Ctrl	MG
g__Coprobacillus	gen	11.743	-1.71809	0.958652	-1.7922	#N/A	#N/A	PD/Ctrl	MG
g__Coprobacter	gen	2.67506	0.629513	0.59107	1.06504	0.286857	0.717143	PD/Ctrl	MG
g__Coprococcus	gen	133.757	0.139706	0.365748	0.381974	0.702481	0.926884	PD/Ctrl	MG
g__Coriobacteriaceae gen. incertae sedis	gen	2.64318	0.548443	0.600227	0.913726	0.360861	0.745256	PD/Ctrl	MG
g__Coriobacteriia gen. incertae sedis	gen	4.50799	-0.0108684	0.581014	-0.018706	0.985076	0.995555	PD/Ctrl	MG
g__Desulfovibrio	gen	19.3274	-0.0894381	0.56755	-0.157586	0.874783	0.995555	PD/Ctrl	MG
g__Dialister	gen	114.493	0.558255	0.823513	0.677895	0.497838	0.82973	PD/Ctrl	MG
g__Dorea	gen	121.339	-0.283581	0.216411	-1.31038	0.190067	0.622013	PD/Ctrl	MG
g__Eggerthella	gen	55.5366	0.167022	0.362195	0.461139	0.644699	0.900813	PD/Ctrl	MG
g__Eggerthellaceae gen. incertae sedis	gen	90.4294	0.0549304	0.235009	0.233737	0.815189	0.968037	PD/Ctrl	MG
g__Eisenbergiella	gen	1.84461	0.725473	0.557826	1.30054	0.193417	0.622013	PD/Ctrl	MG
g__Erysipelatoclostridium	gen	5.92401	-0.66016	0.498193	-1.32511	0.185135	0.622013	PD/Ctrl	MG
g__Erysipelotrichaceae gen. incertae sedis	gen	20.8964	1.90067	0.449784	4.22574	2.38152e-05	0.00185963	PD/Ctrl	MG
g__Escherichia	gen	80.4089	2.76363	0.672017	4.11244	3.91501e-05	0.00185963	PD/Ctrl	MG
g__Eubacteriaceae gen. incertae sedis	gen	1.03792	-0.0495493	0.486515	-0.101845	0.918879	0.995555	PD/Ctrl	MG
g__Eubacterium	gen	541.697	0.273181	0.268957	1.01571	0.309769	0.727819	PD/Ctrl	MG
g__Faecalibacterium	gen	1089.75	-0.152572	0.244708	-0.623485	0.532966	0.843863	PD/Ctrl	MG
g__Faecalicatena	gen	1.68795	2.19569	0.454934	4.8264	#N/A	#N/A	PD/Ctrl	MG
g__Firmicutes gen. [Carnobacterium/Phascolarctobacterium]	gen	25.5078	-0.911912	1.01792	-0.895862	0.370326	0.748532	PD/Ctrl	MG
g__Firmicutes gen. [Coprobacillus/Clostridium]	gen	13.1071	-0.107061	0.922875	-0.116008	#N/A	#N/A	PD/Ctrl	MG
g__Firmicutes gen. [Erysipelatoclostridium/Clostridioides]	gen	1.47061	0.415155	0.441423	0.940493	0.346965	0.732481	PD/Ctrl	MG
g__Firmicutes gen. [Lactobacillus/Lachnospira]	gen	33.3706	-0.20568	0.83454	-0.246459	0.805327	0.968037	PD/Ctrl	MG
g__Firmicutes gen. incertae sedis	gen	250.223	-0.148159	0.327991	-0.451715	0.651474	0.900813	PD/Ctrl	MG
g__Flavonifractor	gen	20.969	0.124482	0.274421	0.453618	0.650104	0.900813	PD/Ctrl	MG
g__Fusicatenibacter	gen	30.3743	-0.626801	0.845635	-0.741219	0.45856	0.82973	PD/Ctrl	MG
g__Gemella	gen	0.529356	0.447702	0.510949	0.876216	0.380913	0.75389	PD/Ctrl	MG
g__Haemophilus	gen	1.36512	-0.796075	0.668726	-1.19043	0.233876	0.653476	PD/Ctrl	MG
g__Holdemanella	gen	86.6184	0.688518	0.80266	0.857795	0.391006	0.758072	PD/Ctrl	MG
g__Holdemania	gen	2.86503	-0.106458	0.274655	-0.387605	0.698308	0.926884	PD/Ctrl	MG
g__Hungatella	gen	1.0515	0.883203	0.495719	1.78166	0.0748042	0.5076	PD/Ctrl	MG
g__Intestinibacter	gen	6.23522	-0.030012	0.501535	-0.0598403	0.952283	0.995555	PD/Ctrl	MG
g__Intestinimonas	gen	3.47819	0.0331499	0.384803	0.0861475	0.931349	0.995555	PD/Ctrl	MG
g__Lachnoclostridium	gen	14.54	0.460536	0.431095	1.06829	0.285388	0.717143	PD/Ctrl	MG
g__Lachnospiraceae gen. incertae sedis	gen	565.586	-0.161154	0.251905	-0.639742	0.52234	0.841056	PD/Ctrl	MG
g__Lactobacillus	gen	31.1372	2.35584	0.54109	4.35388	#N/A	#N/A	PD/Ctrl	MG
g__Lactococcus	gen	5.51608	-0.537409	0.516077	-1.04133	0.29772	0.725216	PD/Ctrl	MG
g__Lentisphaerae gen. incertae sedis	gen	4.85533	0.27225	0.62669	0.434426	0.663979	0.901114	PD/Ctrl	MG
g__Leuconostoc	gen	0.691333	0.188962	0.58328	0.323965	0.745965	0.95634	PD/Ctrl	MG
g__Massilimaliae	gen	0.490296	0.368258	0.466401	0.789573	0.429777	0.816577	PD/Ctrl	MG
g__Massilioclostridium	gen	1.26814	0.204787	0.297873	0.6875	0.491768	0.82973	PD/Ctrl	MG
g__Methanobrevibacter	gen	42.6778	1.13989	0.908363	1.25489	0.20952	0.622013	PD/Ctrl	MG
g__Mogibacterium	gen	1.06523	0.704166	0.363058	1.93954	0.0524351	0.474518	PD/Ctrl	MG
g__Odoribacter	gen	11.6932	-0.0112333	0.227296	-0.0494216	0.960583	0.995555	PD/Ctrl	MG
g__Olsenella	gen	16.6001	3.16459	0.671708	4.71126	#N/A	#N/A	PD/Ctrl	MG
g__Oscillibacter	gen	194.655	0.217414	0.227215	0.956866	0.338635	0.731144	PD/Ctrl	MG
g__Oxalobacteraceae gen. incertae sedis	gen	1.16027	-0.675592	0.621255	-1.08746	0.276832	0.717143	PD/Ctrl	MG
g__Parabacteroides	gen	83.4342	0.352591	0.280742	1.25593	0.209142	0.622013	PD/Ctrl	MG
g__Paraprevotella	gen	16.1842	1.26018	0.947312	1.33027	0.183431	0.622013	PD/Ctrl	MG
g__Parasutterella	gen	2.81261	0.642687	0.593558	1.08277	0.27891	0.717143	PD/Ctrl	MG
g__Peptostreptococcaceae gen. incertae sedis	gen	5.33425	0.183473	0.691499	0.265327	0.790758	0.968037	PD/Ctrl	MG
g__Phascolarctobacterium	gen	38.5897	-0.159544	0.983473	-0.162225	0.871128	0.995555	PD/Ctrl	MG
g__Phocea	gen	0.957916	0.303369	0.408562	0.742528	0.457768	0.82973	PD/Ctrl	MG
g__Prevotella	gen	850.146	-1.27161	0.663234	-1.91729	0.0552016	0.474518	PD/Ctrl	MG
g__Propionibacterium	gen	0.871215	0.564082	0.460403	1.22519	0.220503	0.634781	PD/Ctrl	MG
g__Pseudoflavonifractor	gen	5.29171	-0.235984	0.355516	-0.663777	0.506833	0.830158	PD/Ctrl	MG
g__Rikenellaceae gen. [Tidjanibacter/Alistipes]	gen	12.6514	-0.596941	0.846349	-0.705313	0.480615	0.82973	PD/Ctrl	MG
g__Romboutsia	gen	4.91119	1.05604	0.471125	2.24153	0.0249917	0.395701	PD/Ctrl	MG
g__Roseburia	gen	398.153	-0.568444	0.27144	-2.09418	0.0362436	0.430393	PD/Ctrl	MG
g__Rothia	gen	1.35892	0.297974	0.410936	0.72511	0.468385	0.82973	PD/Ctrl	MG
g__Ruminococcaceae gen. incertae sedis	gen	665.843	0.271902	0.213224	1.2752	0.20224	0.622013	PD/Ctrl	MG
g__Ruminococcus	gen	834.962	-0.00117372	0.318822	-0.00368143	0.997063	0.997063	PD/Ctrl	MG
g__Ruthenibacterium	gen	15.2041	0.833182	0.389135	2.14111	0.0322651	0.430393	PD/Ctrl	MG
g__Senegalimassilia	gen	6.47483	-0.083215	0.624582	-0.133233	0.894009	0.995555	PD/Ctrl	MG
g__Staphylococcus	gen	25.2059	1.92511	1.01594	1.8949	0.0581056	0.474518	PD/Ctrl	MG
g__Streptococcus	gen	47.4621	0.364518	0.363851	1.00183	0.316424	0.727819	PD/Ctrl	MG
g__Subdoligranulum	gen	23.5348	-0.503129	1.12348	-0.447831	0.654275	0.900813	PD/Ctrl	MG
g__Sutterella	gen	49.6513	0.0430978	0.51189	0.0841935	0.932903	0.995555	PD/Ctrl	MG
g__Sutterellaceae gen. incertae sedis	gen	6.7923	0.0891622	0.715968	0.124534	0.900893	0.995555	PD/Ctrl	MG
g__Turicibacter	gen	1.02312	0.915837	0.550168	1.66465	0.0959828	0.554435	PD/Ctrl	MG
g__Veillonella	gen	3.20578	0.786389	0.490717	1.60253	0.109039	0.554435	PD/Ctrl	MG
g__Acinetobacter	gen	30.4681	0.369783	0.978766	0.377806	0.705575	0.907704	iRBD/Ctrl	MG
g__Actinobacteria gen. [Xylanimonas/Schaalia/Sanguibacter]	gen	1.91081	-0.258436	0.3913	-0.660455	0.508962	0.83498	iRBD/Ctrl	MG
g__Actinomyces	gen	12.1107	0.0664292	0.292696	0.226956	0.820458	0.907704	iRBD/Ctrl	MG
g__Adlercreutzia	gen	7.22705	0.155291	0.469741	0.33059	0.740955	0.907704	iRBD/Ctrl	MG
g__Akkermansia	gen	127.773	1.41378	0.66153	2.13714	0.0325866	0.281429	iRBD/Ctrl	MG
g__Alistipes	gen	412.837	0.990819	0.350973	2.82306	0.00475673	0.112972	iRBD/Ctrl	MG
g__Anaeromassilibacillus	gen	3.86562	1.021	0.439205	2.32465	0.0200908	0.21207	iRBD/Ctrl	MG
g__Anaerostipes	gen	173.054	0.613792	0.406938	1.50832	0.131473	0.657367	iRBD/Ctrl	MG
g__Anaerotruncus	gen	9.16219	1.61225	0.51813	3.11168	#N/A	#N/A	iRBD/Ctrl	MG
g__Atopobiaceae gen. incertae sedis	gen	5.52043	0.136068	0.760222	0.178984	0.85795	0.907704	iRBD/Ctrl	MG
g__Atopobium	gen	0.696727	0.00687668	0.639984	0.0107451	0.991427	0.991992	iRBD/Ctrl	MG
g__Azospirillum	gen	43.9306	0.903461	1.20837	0.74767	0.454659	0.83498	iRBD/Ctrl	MG
g__Bacteria gen. incertae sedis	gen	60.5244	-0.719954	0.56086	-1.28366	0.199261	0.79759	iRBD/Ctrl	MG
g__Bacteroidales gen. incertae sedis	gen	96.4458	0.14246	0.535605	0.265979	0.790255	0.907704	iRBD/Ctrl	MG
g__Bacteroides	gen	845.927	0.333271	0.320257	1.04064	0.298045	0.83498	iRBD/Ctrl	MG
g__Barnesiella	gen	35.0855	0.722923	0.534083	1.35358	0.175871	0.795606	iRBD/Ctrl	MG
g__Bifidobacterium	gen	372.334	0.210252	0.528157	0.398087	0.690566	0.907704	iRBD/Ctrl	MG
g__Bilophila	gen	13.0624	-0.102728	0.492497	-0.208585	0.834772	0.907704	iRBD/Ctrl	MG
g__Bittarella	gen	1.54143	0.0484354	0.294777	0.164312	0.869485	0.907704	iRBD/Ctrl	MG
g__Blautia	gen	520.22	0.155738	0.225478	0.690703	0.489752	0.83498	iRBD/Ctrl	MG
g__Butyricicoccus	gen	41.8105	0.126884	0.307276	0.412931	0.679657	0.907704	iRBD/Ctrl	MG
g__Christensenella	gen	0.833961	0.404692	0.471943	0.857501	0.391168	0.83498	iRBD/Ctrl	MG
g__Clostridia gen. incertae sedis	gen	17.423	0.231258	0.726986	0.318104	0.750406	0.907704	iRBD/Ctrl	MG
g__Clostridiaceae gen. incertae sedis	gen	7.96727	0.469472	0.632062	0.742763	#N/A	#N/A	iRBD/Ctrl	MG
g__Clostridiales Family XIII. Incertae Sedis gen. incertae sedis	gen	27.1226	-0.561423	0.344538	-1.6295	0.103208	0.612798	iRBD/Ctrl	MG
g__Clostridiales gen. [Clostridium/Eubacterium]	gen	57.0454	-0.566458	1.1643	-0.486525	0.626595	0.907704	iRBD/Ctrl	MG
g__Clostridiales gen. [Clostridium/Flavonifractor]	gen	3.7914	0.903477	0.378624	2.38621	0.017023	0.202148	iRBD/Ctrl	MG
g__Clostridiales gen. [Ruminococcus/Blautia]	gen	24.5741	-0.778597	0.653361	-1.19168	0.233387	0.83498	iRBD/Ctrl	MG
g__Clostridiales gen. [Ruminococcus/Clostridium]	gen	25.5388	0.338398	1.03979	0.325449	#N/A	#N/A	iRBD/Ctrl	MG
g__Clostridiales gen. [Ruminococcus/Eubacterium]	gen	5.0044	-0.390085	0.387844	-1.00578	0.314522	0.83498	iRBD/Ctrl	MG
g__Clostridiales gen. incertae sedis	gen	1839.37	0.178111	0.219141	0.812769	0.416351	0.83498	iRBD/Ctrl	MG
g__Clostridium	gen	897.441	0.196676	0.290489	0.677051	0.498373	0.83498	iRBD/Ctrl	MG
g__Collinsella	gen	253.888	-0.344449	0.374786	-0.919054	0.358068	0.83498	iRBD/Ctrl	MG
g__Coprobacillus	gen	11.743	-2.17339	1.16062	-1.87262	#N/A	#N/A	iRBD/Ctrl	MG
g__Coprobacter	gen	2.67506	2.78951	0.685102	4.07168	4.66754e-05	0.00443416	iRBD/Ctrl	MG
g__Coprococcus	gen	133.757	0.298173	0.442876	0.673265	0.500779	0.83498	iRBD/Ctrl	MG
g__Coriobacteriaceae gen. incertae sedis	gen	2.64318	-0.533738	0.734332	-0.726836	0.467327	0.83498	iRBD/Ctrl	MG
g__Coriobacteriia gen. incertae sedis	gen	4.50799	-0.908626	0.711365	-1.2773	0.201496	0.79759	iRBD/Ctrl	MG
g__Desulfovibrio	gen	19.3274	-1.8367	0.691971	-2.65431	0.00794715	0.150996	iRBD/Ctrl	MG
g__Dialister	gen	114.493	0.714058	0.997523	0.715832	0.474095	0.83498	iRBD/Ctrl	MG
g__Dorea	gen	121.339	-0.235794	0.261879	-0.900393	0.367911	0.83498	iRBD/Ctrl	MG
g__Eggerthella	gen	55.5366	0.134059	0.438687	0.305591	0.759916	0.907704	iRBD/Ctrl	MG
g__Eggerthellaceae gen. incertae sedis	gen	90.4294	0.195313	0.284159	0.687337	0.49187	0.83498	iRBD/Ctrl	MG
g__Eisenbergiella	gen	1.84461	1.61413	0.653593	2.46962	0.0135257	0.202148	iRBD/Ctrl	MG
g__Erysipelatoclostridium	gen	5.92401	0.392538	0.595491	0.659185	0.509777	0.83498	iRBD/Ctrl	MG
g__Erysipelotrichaceae gen. incertae sedis	gen	20.8964	-0.0308601	0.548887	-0.0562231	0.955164	0.975705	iRBD/Ctrl	MG
g__Escherichia	gen	80.4089	1.27786	0.815582	1.56681	0.117159	0.654713	iRBD/Ctrl	MG
g__Eubacteriaceae gen. incertae sedis	gen	1.03792	-0.793551	0.605675	-1.31019	0.190131	0.79759	iRBD/Ctrl	MG
g__Eubacterium	gen	541.697	0.259499	0.325802	0.796492	0.425746	0.83498	iRBD/Ctrl	MG
g__Faecalibacterium	gen	1089.75	-0.156504	0.296434	-0.527955	0.59753	0.907704	iRBD/Ctrl	MG
g__Faecalicatena	gen	1.68795	1.62673	0.557308	2.91891	#N/A	#N/A	iRBD/Ctrl	MG
g__Firmicutes gen. [Carnobacterium/Phascolarctobacterium]	gen	25.5078	1.09164	1.23148	0.886448	0.375376	0.83498	iRBD/Ctrl	MG
g__Firmicutes gen. [Coprobacillus/Clostridium]	gen	13.1071	1.65608	1.1156	1.48448	#N/A	#N/A	iRBD/Ctrl	MG
g__Firmicutes gen. [Erysipelatoclostridium/Clostridioides]	gen	1.47061	0.604113	0.522391	1.15644	0.247503	0.83498	iRBD/Ctrl	MG
g__Firmicutes gen. [Lactobacillus/Lachnospira]	gen	33.3706	-0.251639	1.0109	-0.248925	0.803419	0.907704	iRBD/Ctrl	MG
g__Firmicutes gen. incertae sedis	gen	250.223	0.0267507	0.397238	0.0673418	0.94631	0.975705	iRBD/Ctrl	MG
g__Flavonifractor	gen	20.969	0.14181	0.331257	0.428095	0.668582	0.907704	iRBD/Ctrl	MG
g__Fusicatenibacter	gen	30.3743	-1.50735	1.02547	-1.46991	0.141585	0.672528	iRBD/Ctrl	MG
g__Gemella	gen	0.529356	0.220947	0.604877	0.365275	0.714906	0.907704	iRBD/Ctrl	MG
g__Haemophilus	gen	1.36512	-1.35673	0.821648	-1.65123	0.0986908	0.612798	iRBD/Ctrl	MG
g__Holdemanella	gen	86.6184	-0.89517	0.972686	-0.920307	0.357412	0.83498	iRBD/Ctrl	MG
g__Holdemania	gen	2.86503	0.594073	0.310176	1.91528	0.0554571	0.396372	iRBD/Ctrl	MG
g__Hungatella	gen	1.0515	0.451292	0.600148	0.751968	0.45207	0.83498	iRBD/Ctrl	MG
g__Intestinibacter	gen	6.23522	0.211036	0.603635	0.349608	0.726633	0.907704	iRBD/Ctrl	MG
g__Intestinimonas	gen	3.47819	1.08612	0.453313	2.39596	0.016577	0.202148	iRBD/Ctrl	MG
g__Lachnoclostridium	gen	14.54	0.791096	0.520588	1.51962	0.128606	0.657367	iRBD/Ctrl	MG
g__Lachnospiraceae gen. incertae sedis	gen	565.586	0.101983	0.30507	0.334296	0.738157	0.907704	iRBD/Ctrl	MG
g__Lactobacillus	gen	31.1372	-1.34819	0.669472	-2.01381	#N/A	#N/A	iRBD/Ctrl	MG
g__Lactococcus	gen	5.51608	0.315049	0.617535	0.510172	0.609931	0.907704	iRBD/Ctrl	MG
g__Lentisphaerae gen. incertae sedis	gen	4.85533	-0.18328	0.755388	-0.242631	0.808291	0.907704	iRBD/Ctrl	MG
g__Leuconostoc	gen	0.691333	-0.255558	0.716632	-0.356611	0.721383	0.907704	iRBD/Ctrl	MG
g__Massilimaliae	gen	0.490296	0.50634	0.542502	0.933343	0.350643	0.83498	iRBD/Ctrl	MG
g__Massilioclostridium	gen	1.26814	-0.0618372	0.360885	-0.171349	0.863949	0.907704	iRBD/Ctrl	MG
g__Methanobrevibacter	gen	42.6778	1.28175	1.10026	1.16495	0.244039	0.83498	iRBD/Ctrl	MG
g__Mogibacterium	gen	1.06523	0.0907467	0.4463	0.203331	0.838876	0.907704	iRBD/Ctrl	MG
g__Odoribacter	gen	11.6932	0.229579	0.271559	0.845411	0.397881	0.83498	iRBD/Ctrl	MG
g__Olsenella	gen	16.6001	0.349071	0.829082	0.421033	#N/A	#N/A	iRBD/Ctrl	MG
g__Oscillibacter	gen	194.655	-0.250723	0.275319	-0.910665	0.362472	0.83498	iRBD/Ctrl	MG
g__Oxalobacteraceae gen. incertae sedis	gen	1.16027	-0.130156	0.715691	-0.181861	0.855692	0.907704	iRBD/Ctrl	MG
g__Parabacteroides	gen	83.4342	0.360618	0.339795	1.06128	0.288562	0.83498	iRBD/Ctrl	MG
g__Paraprevotella	gen	16.1842	0.223537	1.14917	0.194521	0.845768	0.907704	iRBD/Ctrl	MG
g__Parasutterella	gen	2.81261	-0.00726469	0.723827	-0.0100365	0.991992	0.991992	iRBD/Ctrl	MG
g__Peptostreptococcaceae gen. incertae sedis	gen	5.33425	-0.265299	0.835678	-0.317466	0.75089	0.907704	iRBD/Ctrl	MG
g__Phascolarctobacterium	gen	38.5897	-3.93342	1.19901	-3.28054	0.00103608	0.0492136	iRBD/Ctrl	MG
g__Phocea	gen	0.957916	0.213574	0.486347	0.439139	0.660561	0.907704	iRBD/Ctrl	MG
g__Prevotella	gen	850.146	-1.74579	0.803474	-2.1728	0.0297952	0.281429	iRBD/Ctrl	MG
g__Propionibacterium	gen	0.871215	-1.23584	0.618381	-1.99851	0.0456619	0.36149	iRBD/Ctrl	MG
g__Pseudoflavonifractor	gen	5.29171	0.205502	0.422705	0.486159	0.626855	0.907704	iRBD/Ctrl	MG
g__Rikenellaceae gen. [Tidjanibacter/Alistipes]	gen	12.6514	-0.574619	1.02505	-0.560575	0.575087	0.907704	iRBD/Ctrl	MG
g__Romboutsia	gen	4.91119	0.513281	0.572928	0.89589	0.370311	0.83498	iRBD/Ctrl	MG
g__Roseburia	gen	398.153	-0.271817	0.328644	-0.827088	0.408187	0.83498	iRBD/Ctrl	MG
g__Rothia	gen	1.35892	0.431794	0.487799	0.885189	0.376055	0.83498	iRBD/Ctrl	MG
g__Ruminococcaceae gen. incertae sedis	gen	665.843	0.189239	0.258272	0.732714	0.463733	0.83498	iRBD/Ctrl	MG
g__Ruminococcus	gen	834.962	0.314364	0.386202	0.813987	0.415652	0.83498	iRBD/Ctrl	MG
g__Ruthenibacterium	gen	15.2041	0.892957	0.471818	1.89259	0.0584128	0.396372	iRBD/Ctrl	MG
g__Senegalimassilia	gen	6.47483	-0.651074	0.75758	-0.859413	0.390113	0.83498	iRBD/Ctrl	MG
g__Staphylococcus	gen	25.2059	3.51016	1.22951	2.85493	0.00430465	0.112972	iRBD/Ctrl	MG
g__Streptococcus	gen	47.4621	-0.0984806	0.441014	-0.223305	0.823298	0.907704	iRBD/Ctrl	MG
g__Subdoligranulum	gen	23.5348	-0.303146	1.36075	-0.222779	0.823708	0.907704	iRBD/Ctrl	MG
g__Sutterella	gen	49.6513	-0.605467	0.62015	-0.976323	0.328904	0.83498	iRBD/Ctrl	MG
g__Sutterellaceae gen. incertae sedis	gen	6.7923	-0.340697	0.866772	-0.393064	0.694272	0.907704	iRBD/Ctrl	MG
g__Turicibacter	gen	1.02312	-0.30808	0.677975	-0.454412	0.649532	0.907704	iRBD/Ctrl	MG
g__Veillonella	gen	3.20578	0.445885	0.595137	0.749214	0.453728	0.83498	iRBD/Ctrl	MG
g__Acinetobacter	gen	30.4681	-2.42488	0.96425	-2.51478	0.0119105	0.161643	PD/iRBD	MG
g__Actinobacteria gen. [Xylanimonas/Schaalia/Sanguibacter]	gen	1.91081	0.736967	0.372421	1.97885	0.0478324	0.349544	PD/iRBD	MG
g__Actinomyces	gen	12.1107	0.388373	0.28465	1.36439	0.172445	0.546076	PD/iRBD	MG
g__Adlercreutzia	gen	7.22705	-0.782261	0.463518	-1.68766	0.0914762	0.427628	PD/iRBD	MG
g__Akkermansia	gen	127.773	-0.631148	0.648859	-0.972704	0.3307	0.755216	PD/iRBD	MG
g__Alistipes	gen	412.837	0.0292431	0.344221	0.0849545	0.932298	0.989213	PD/iRBD	MG
g__Anaeromassilibacillus	gen	3.86562	-0.653703	0.423797	-1.54249	0.122954	0.486694	PD/iRBD	MG
g__Anaerostipes	gen	173.054	-0.667217	0.399262	-1.67112	0.0946974	0.427628	PD/iRBD	MG
g__Anaerotruncus	gen	9.16219	0.0128351	0.499319	0.0257053	#N/A	#N/A	PD/iRBD	MG
g__Atopobiaceae gen. incertae sedis	gen	5.52043	0.0924596	0.744679	0.12416	0.901188	0.989213	PD/iRBD	MG
g__Atopobium	gen	0.696727	-0.280387	0.635186	-0.441426	0.658905	0.894228	PD/iRBD	MG
g__Azospirillum	gen	43.9306	-0.878182	1.18559	-0.740714	0.458867	0.778435	PD/iRBD	MG
g__Bacteria gen. incertae sedis	gen	60.5244	0.499918	0.550314	0.908424	0.363654	0.755216	PD/iRBD	MG
g__Bacteroidales gen. incertae sedis	gen	96.4458	0.855092	0.525213	1.62808	0.103507	0.427628	PD/iRBD	MG
g__Bacteroides	gen	845.927	0.0965854	0.314206	0.307396	0.758542	0.948178	PD/iRBD	MG
g__Barnesiella	gen	35.0855	-0.613828	0.523821	-1.17183	0.241267	0.674127	PD/iRBD	MG
g__Bifidobacterium	gen	372.334	-0.258476	0.51822	-0.498777	0.617937	0.876179	PD/iRBD	MG
g__Bilophila	gen	13.0624	0.389777	0.48247	0.80788	0.41916	0.768171	PD/iRBD	MG
g__Bittarella	gen	1.54143	-0.442328	0.298476	-1.48196	0.138352	0.490357	PD/iRBD	MG
g__Blautia	gen	520.22	-0.454747	0.221264	-2.05522	0.0398577	0.344225	PD/iRBD	MG
g__Butyricicoccus	gen	41.8105	-0.281514	0.301523	-0.933638	0.350491	0.755216	PD/iRBD	MG
g__Christensenella	gen	0.833961	-0.975367	0.484196	-2.01441	0.0439669	0.348072	PD/iRBD	MG
g__Clostridia gen. incertae sedis	gen	17.423	-1.16657	0.716576	-1.62797	0.103531	0.427628	PD/iRBD	MG
g__Clostridiaceae gen. incertae sedis	gen	7.96727	-0.335874	0.619249	-0.54239	#N/A	#N/A	PD/iRBD	MG
g__Clostridiales Family XIII. Incertae Sedis gen. incertae sedis	gen	27.1226	0.712381	0.337868	2.10846	0.0349916	0.33242	PD/iRBD	MG
g__Clostridiales gen. [Clostridium/Eubacterium]	gen	57.0454	-1.17199	1.14291	-1.02544	0.305154	0.755216	PD/iRBD	MG
g__Clostridiales gen. [Clostridium/Flavonifractor]	gen	3.7914	-1.00547	0.371186	-2.7088	0.00675262	0.1283	PD/iRBD	MG
g__Clostridiales gen. [Ruminococcus/Blautia]	gen	24.5741	0.0226534	0.64165	0.035305	0.971837	0.989213	PD/iRBD	MG
g__Clostridiales gen. [Ruminococcus/Clostridium]	gen	25.5388	-0.0493546	1.02135	-0.0483231	#N/A	#N/A	PD/iRBD	MG
g__Clostridiales gen. [Ruminococcus/Eubacterium]	gen	5.0044	0.0771776	0.381783	0.202151	0.839799	0.989213	PD/iRBD	MG
g__Clostridiales gen. incertae sedis	gen	1839.37	-0.170105	0.21502	-0.79111	0.42888	0.768171	PD/iRBD	MG
g__Clostridium	gen	897.441	-0.127104	0.285017	-0.445952	0.655632	0.894228	PD/iRBD	MG
g__Collinsella	gen	253.888	0.186118	0.367744	0.506106	0.612782	0.876179	PD/iRBD	MG
g__Coprobacillus	gen	11.743	0.455302	1.1408	0.399107	#N/A	#N/A	PD/iRBD	MG
g__Coprobacter	gen	2.67506	-2.16	0.658042	-3.28247	0.00102903	0.0424728	PD/iRBD	MG
g__Coprococcus	gen	133.757	-0.158467	0.434488	-0.364721	0.71532	0.918316	PD/iRBD	MG
g__Coriobacteriaceae gen. incertae sedis	gen	2.64318	1.08218	0.718145	1.50691	0.131833	0.490357	PD/iRBD	MG
g__Coriobacteriia gen. incertae sedis	gen	4.50799	0.897758	0.697706	1.28673	0.198189	0.588374	PD/iRBD	MG
g__Desulfovibrio	gen	19.3274	1.74727	0.679278	2.57224	0.0101042	0.159984	PD/iRBD	MG
g__Dialister	gen	114.493	-0.155803	0.978662	-0.1592	0.873511	0.989213	PD/iRBD	MG
g__Dorea	gen	121.339	-0.0477871	0.257032	-0.185919	0.852509	0.989213	PD/iRBD	MG
g__Eggerthella	gen	55.5366	0.0329638	0.430259	0.0766138	0.938931	0.989213	PD/iRBD	MG
g__Eggerthellaceae gen. incertae sedis	gen	90.4294	-0.140382	0.278683	-0.503735	0.614447	0.876179	PD/iRBD	MG
g__Eisenbergiella	gen	1.84461	-0.888653	0.62624	-1.41903	0.15589	0.528914	PD/iRBD	MG
g__Erysipelatoclostridium	gen	5.92401	-1.0527	0.587595	-1.79154	0.0732071	0.427628	PD/iRBD	MG
g__Erysipelotrichaceae gen. incertae sedis	gen	20.8964	1.93153	0.535629	3.6061	0.000310829	0.0295288	PD/iRBD	MG
g__Escherichia	gen	80.4089	1.48577	0.798537	1.86061	0.0627988	0.397726	PD/iRBD	MG
g__Eubacteriaceae gen. incertae sedis	gen	1.03792	0.744002	0.592245	1.25624	0.209029	0.601751	PD/iRBD	MG
g__Eubacterium	gen	541.697	0.013683	0.319649	0.0428063	0.965856	0.989213	PD/iRBD	MG
g__Faecalibacterium	gen	1089.75	0.00393228	0.290863	0.0135194	0.989213	0.989213	PD/iRBD	MG
g__Faecalicatena	gen	1.68795	0.568961	0.505257	1.12608	#N/A	#N/A	PD/iRBD	MG
g__Firmicutes gen. [Carnobacterium/Phascolarctobacterium]	gen	25.5078	-2.00356	1.20909	-1.65708	0.0975035	0.427628	PD/iRBD	MG
g__Firmicutes gen. [Coprobacillus/Clostridium]	gen	13.1071	-1.76314	1.09473	-1.61058	#N/A	#N/A	PD/iRBD	MG
g__Firmicutes gen. [Erysipelatoclostridium/Clostridioides]	gen	1.47061	-0.188957	0.501458	-0.376815	0.706311	0.918316	PD/iRBD	MG
g__Firmicutes gen. [Lactobacillus/Lachnospira]	gen	33.3706	0.0459586	0.991974	0.0463305	0.963047	0.989213	PD/iRBD	MG
g__Firmicutes gen. incertae sedis	gen	250.223	-0.174909	0.389785	-0.448733	0.653624	0.894228	PD/iRBD	MG
g__Flavonifractor	gen	20.969	-0.0173273	0.324347	-0.0534223	0.957395	0.989213	PD/iRBD	MG
g__Fusicatenibacter	gen	30.3743	0.880546	1.00649	0.874864	0.381648	0.755345	PD/iRBD	MG
g__Gemella	gen	0.529356	0.226755	0.575721	0.393863	0.693682	0.915275	PD/iRBD	MG
g__Haemophilus	gen	1.36512	0.560658	0.820395	0.683401	0.494354	0.823923	PD/iRBD	MG
g__Holdemanella	gen	86.6184	1.58369	0.954248	1.65962	0.096991	0.427628	PD/iRBD	MG
g__Holdemania	gen	2.86503	-0.700531	0.305008	-2.29676	0.0216322	0.22834	PD/iRBD	MG
g__Hungatella	gen	1.0515	0.431911	0.564511	0.765107	0.444208	0.768171	PD/iRBD	MG
g__Intestinibacter	gen	6.23522	-0.241048	0.592078	-0.407122	0.683919	0.915102	PD/iRBD	MG
g__Intestinimonas	gen	3.47819	-1.05297	0.444058	-2.37124	0.0177284	0.210524	PD/iRBD	MG
g__Lachnoclostridium	gen	14.54	-0.33056	0.509343	-0.648993	0.516343	0.843855	PD/iRBD	MG
g__Lachnospiraceae gen. incertae sedis	gen	565.586	-0.263137	0.299334	-0.879075	0.379361	0.755345	PD/iRBD	MG
g__Lactobacillus	gen	31.1372	3.70403	0.653398	5.66888	#N/A	#N/A	PD/iRBD	MG
g__Lactococcus	gen	5.51608	-0.852458	0.610597	-1.39611	0.162683	0.532926	PD/iRBD	MG
g__Lentisphaerae gen. incertae sedis	gen	4.85533	0.455531	0.739103	0.616329	0.537677	0.850736	PD/iRBD	MG
g__Leuconostoc	gen	0.691333	0.44452	0.697756	0.637071	0.524078	0.843855	PD/iRBD	MG
g__Massilimaliae	gen	0.490296	-0.138082	0.527722	-0.261657	0.793586	0.966547	PD/iRBD	MG
g__Massilioclostridium	gen	1.26814	0.266625	0.345758	0.771129	0.44063	0.768171	PD/iRBD	MG
g__Methanobrevibacter	gen	42.6778	-0.141858	1.07905	-0.131467	0.895406	0.989213	PD/iRBD	MG
g__Mogibacterium	gen	1.06523	0.61342	0.414988	1.47816	0.139365	0.490357	PD/iRBD	MG
g__Odoribacter	gen	11.6932	-0.240812	0.266212	-0.904588	0.365684	0.755216	PD/iRBD	MG
g__Olsenella	gen	16.6001	2.81552	0.80186	3.51123	#N/A	#N/A	PD/iRBD	MG
g__Oscillibacter	gen	194.655	0.468138	0.270061	1.73345	0.0830154	0.427628	PD/iRBD	MG
g__Oxalobacteraceae gen. incertae sedis	gen	1.16027	-0.545435	0.710248	-0.76795	0.442517	0.768171	PD/iRBD	MG
g__Parabacteroides	gen	83.4342	-0.00802695	0.333106	-0.0240973	0.980775	0.989213	PD/iRBD	MG
g__Paraprevotella	gen	16.1842	1.03664	1.12602	0.920623	0.357247	0.755216	PD/iRBD	MG
g__Parasutterella	gen	2.81261	0.649952	0.702838	0.924753	0.355094	0.755216	PD/iRBD	MG
g__Peptostreptococcaceae gen. incertae sedis	gen	5.33425	0.448773	0.818737	0.548128	0.583604	0.876179	PD/iRBD	MG
g__Phascolarctobacterium	gen	38.5897	3.77387	1.17676	3.207	0.00134125	0.0424728	PD/iRBD	MG
g__Phocea	gen	0.957916	0.0897945	0.465392	0.192944	0.847003	0.989213	PD/iRBD	MG
g__Prevotella	gen	850.146	0.474181	0.788395	0.601451	0.547539	0.850736	PD/iRBD	MG
g__Propionibacterium	gen	0.871215	1.79992	0.59161	3.04241	0.00234695	0.0557401	PD/iRBD	MG
g__Pseudoflavonifractor	gen	5.29171	-0.441485	0.415504	-1.06253	0.287996	0.739449	PD/iRBD	MG
g__Rikenellaceae gen. [Tidjanibacter/Alistipes]	gen	12.6514	-0.0223221	1.00651	-0.0221777	0.982306	0.989213	PD/iRBD	MG
g__Romboutsia	gen	4.91119	0.542761	0.555729	0.976666	0.328735	0.755216	PD/iRBD	MG
g__Roseburia	gen	398.153	-0.296627	0.322509	-0.919747	0.357705	0.755216	PD/iRBD	MG
g__Rothia	gen	1.35892	-0.133821	0.470876	-0.284195	0.776261	0.957724	PD/iRBD	MG
g__Ruminococcaceae gen. incertae sedis	gen	665.843	0.0826626	0.253375	0.326246	0.744238	0.942702	PD/iRBD	MG
g__Ruminococcus	gen	834.962	-0.315538	0.378936	-0.832693	0.405018	0.768171	PD/iRBD	MG
g__Ruthenibacterium	gen	15.2041	-0.0597755	0.459855	-0.129988	0.896576	0.989213	PD/iRBD	MG
g__Senegalimassilia	gen	6.47483	0.567859	0.743048	0.764229	0.444731	0.768171	PD/iRBD	MG
g__Staphylococcus	gen	25.2059	-1.58506	1.20324	-1.31732	0.187731	0.575306	PD/iRBD	MG
g__Streptococcus	gen	47.4621	0.462998	0.432417	1.07072	0.284295	0.739449	PD/iRBD	MG
g__Subdoligranulum	gen	23.5348	-0.199983	1.33539	-0.149756	0.880957	0.989213	PD/iRBD	MG
g__Sutterella	gen	49.6513	0.648565	0.608374	1.06606	0.286395	0.739449	PD/iRBD	MG
g__Sutterellaceae gen. incertae sedis	gen	6.7923	0.429859	0.849756	0.505862	0.612953	0.876179	PD/iRBD	MG
g__Turicibacter	gen	1.02312	1.22392	0.642792	1.90406	0.056902	0.386121	PD/iRBD	MG
g__Veillonella	gen	3.20578	0.340504	0.577165	0.58996	0.555217	0.850736	PD/iRBD	MG
s__[Clostridium] asparagiforme/lavalense [ref_mOTU_v3_06317]	spec	1.25593	0.273567	0.374346	0.730785	0.46491	#N/A	Case/Ctrl	MG
s__[Clostridium] citroniae [ref_mOTU_v3_04828]	spec	0.75558	-0.302499	0.353721	-0.855192	0.392445	#N/A	Case/Ctrl	MG
s__[Clostridium] clostridioforme/bolteae [ref_mOTU_v3_03442]	spec	3.66415	-0.359902	0.496458	-0.724939	0.468489	0.852917	Case/Ctrl	MG
s__[Clostridium] glycyrrhizinilyticum [ref_mOTU_v3_03672]	spec	1.2163	0.0863429	0.542338	0.159205	0.873507	#N/A	Case/Ctrl	MG
s__[Clostridium] leptum [ref_mOTU_v3_03688]	spec	3.6282	0.372913	0.348533	1.06995	0.284642	0.828078	Case/Ctrl	MG
s__[Clostridium] scindens [ref_mOTU_v3_03437]	spec	2.59496	2.53869	0.642006	3.95431	#N/A	#N/A	Case/Ctrl	MG
s__[Clostridium] spiroforme [ref_mOTU_v3_11181]	spec	1.38532	-0.223744	0.650391	-0.344015	0.730835	#N/A	Case/Ctrl	MG
s__[Clostridium] symbiosum [ref_mOTU_v3_04652]	spec	0.75177	-0.310197	0.479834	-0.646468	0.517976	#N/A	Case/Ctrl	MG
s__[Eubacterium] eligens [ref_mOTU_v3_02375]	spec	5.11151	-0.277102	0.732473	-0.378311	0.7052	0.910945	Case/Ctrl	MG
s__[Eubacterium] eligens [ref_mOTU_v3_02376]	spec	45.7297	0.0181407	0.540132	0.0335856	0.973208	0.987214	Case/Ctrl	MG
s__[Eubacterium] hallii [ref_mOTU_v3_03632]	spec	45.7262	0.131019	0.375725	0.348709	0.727308	0.910945	Case/Ctrl	MG
s__[Eubacterium] rectale [ref_mOTU_v3_03657]	spec	328.011	-0.290814	0.465226	-0.625104	0.531903	0.895669	Case/Ctrl	MG
s__[Eubacterium] siraeum [ref_mOTU_v3_02370]	spec	60.4924	1.07503	0.523704	2.05275	0.0400966	0.357111	Case/Ctrl	MG
s__[Eubacterium] sulci [ref_mOTU_v3_06466]	spec	0.406015	-0.306211	0.400978	-0.76366	0.44507	#N/A	Case/Ctrl	MG
s__[Ruminococcus] gnavus [ref_mOTU_v3_01594]	spec	12.622	0.254695	0.569834	0.446963	0.654901	0.909974	Case/Ctrl	MG
s__[Ruminococcus] torques [ref_mOTU_v3_03659]	spec	18.9646	-0.825073	0.598008	-1.3797	0.167679	0.706708	Case/Ctrl	MG
s__[Ruminococcus] torques [ref_mOTU_v3_03660]	spec	45.636	-0.474957	0.475486	-0.998889	0.317849	0.830444	Case/Ctrl	MG
s__[Ruminococcus] torques [ref_mOTU_v3_03703]	spec	20.3631	-0.36421	0.460697	-0.790564	0.429198	0.852917	Case/Ctrl	MG
s__Acinetobacter sp. [ref_mOTU_v3_02372]	spec	11.4518	-0.97801	0.918324	-1.06499	0.286878	0.828078	Case/Ctrl	MG
s__Acinetobacter species incertae sedis [meta_mOTU_v3_12662]	spec	16.9412	-1.13565	0.94172	-1.20593	0.227844	0.793296	Case/Ctrl	MG
s__Actinobacteria sp. [ref_mOTU_v3_01911]	spec	2.00336	0.314531	0.310589	1.01269	0.311207	#N/A	Case/Ctrl	MG
s__Actinomyces graevenitzii [ref_mOTU_v3_04054]	spec	0.908482	-0.157193	0.325579	-0.48281	0.629231	#N/A	Case/Ctrl	MG
s__Actinomyces naeslundii [ref_mOTU_v3_02018]	spec	0.481575	0.124405	0.430632	0.288889	0.772666	#N/A	Case/Ctrl	MG
s__Actinomyces oris [ref_mOTU_v3_02019]	spec	2.35576	0.837789	0.306556	2.7329	0.00627788	0.122053	Case/Ctrl	MG
s__Actinomyces sp. [ref_mOTU_v3_01913]	spec	0.952875	0.0923337	0.512919	0.180016	0.85714	#N/A	Case/Ctrl	MG
s__Actinomyces sp. ICM47 [ref_mOTU_v3_01914]	spec	1.35023	0.218496	0.34634	0.63087	0.528125	#N/A	Case/Ctrl	MG
s__Actinomyces sp. oral taxon 448 [ref_mOTU_v3_12049]	spec	0.585326	0.478708	0.404411	1.18372	0.236525	#N/A	Case/Ctrl	MG
s__Actinomyces species incertae sedis [ext_mOTU_v3_17926]	spec	1.57927	-0.0271653	0.385487	-0.0704701	0.94382	#N/A	Case/Ctrl	MG
s__Actinomyces species incertae sedis [ext_mOTU_v3_19569]	spec	0.877102	0.143298	0.555226	0.25809	0.796337	#N/A	Case/Ctrl	MG
s__Adlercreutzia equolifaciens [ref_mOTU_v3_08094]	spec	7.3886	-0.365771	0.368953	-0.991376	0.321502	0.830444	Case/Ctrl	MG
s__Akkermansia muciniphila [ref_mOTU_v3_03591]	spec	129.808	1.08859	0.621573	1.75135	0.079885	0.534188	Case/Ctrl	MG
s__Alistipes finegoldii [ref_mOTU_v3_03682]	spec	13.2356	0.993659	0.601916	1.65083	0.0987742	0.586472	Case/Ctrl	MG
s__Alistipes finegoldii/onderdonkii [ref_mOTU_v3_03069]	spec	122.22	0.823058	0.539447	1.52574	0.127074	0.613832	Case/Ctrl	MG
s__Alistipes ihumii [ref_mOTU_v3_07379]	spec	9.81834	1.46205	0.506038	2.88921	0.0038621	0.0988347	Case/Ctrl	MG
s__Alistipes indistinctus [ref_mOTU_v3_11860]	spec	2.3132	0.112636	0.554774	0.20303	0.839112	0.922932	Case/Ctrl	MG
s__Alistipes obesi [ref_mOTU_v3_06695]	spec	24.0782	1.5292	0.487305	3.13806	0.00170068	0.0605867	Case/Ctrl	MG
s__Alistipes putredinis [ref_mOTU_v3_03683]	spec	114.636	0.226834	0.481876	0.470732	0.637832	0.909974	Case/Ctrl	MG
s__Alistipes senegalensis [ref_mOTU_v3_01017]	spec	3.31327	1.14086	0.731051	1.56057	0.118626	0.600647	Case/Ctrl	MG
s__Alistipes shahii [ref_mOTU_v3_01014]	spec	35.6758	0.998346	0.464782	2.14799	0.0317149	0.306167	Case/Ctrl	MG
s__Anaeromassilibacillus species incertae sedis [meta_mOTU_v3_13295]	spec	2.18529	0.445456	0.390291	1.14134	0.253728	0.824778	Case/Ctrl	MG
s__Anaerostipes hadrus [ref_mOTU_v3_00856]	spec	83.1283	0.266793	0.346326	0.770351	0.441092	0.852917	Case/Ctrl	MG
s__Anaerostipes hadrus [ref_mOTU_v3_00857]	spec	79.3805	0.120694	0.321611	0.375278	0.707453	0.910945	Case/Ctrl	MG
s__Anaerotruncus colihominis [ref_mOTU_v3_03438]	spec	1.49566	1.05541	0.526164	2.00586	0.0448716	#N/A	Case/Ctrl	MG
s__Anaerotruncus rubiinfantis [ref_mOTU_v3_09169]	spec	0.920755	0.403685	0.336908	1.19821	0.230837	#N/A	Case/Ctrl	MG
s__Atopobiaceae species incertae sedis [meta_mOTU_v3_13944]	spec	5.51986	0.493383	0.580463	0.849982	0.395335	0.830937	Case/Ctrl	MG
s__Bacteria species incertae sedis [ext_mOTU_v3_16372]	spec	3.11264	0.487141	0.793388	0.614001	#N/A	#N/A	Case/Ctrl	MG
s__bacterium LF-3 [ref_mOTU_v3_03628]	spec	34.8378	-0.584163	0.483458	-1.2083	0.226931	0.793296	Case/Ctrl	MG
s__Bacteroidales species incertae sedis [meta_mOTU_v3_12262]	spec	8.88477	0.429798	0.355693	1.20834	0.226917	0.793296	Case/Ctrl	MG
s__Bacteroidales species incertae sedis [meta_mOTU_v3_13286]	spec	6.08971	0.42102	0.499743	0.842473	0.399523	0.831125	Case/Ctrl	MG
s__Bacteroides caccae [ref_mOTU_v3_03473]	spec	24.2632	-0.0336783	0.547316	-0.0615335	0.950934	0.974879	Case/Ctrl	MG
s__Bacteroides caecimuris [ref_mOTU_v3_03476]	spec	11.7787	-0.881446	0.637002	-1.38374	0.166438	0.706708	Case/Ctrl	MG
s__Bacteroides dorei/vulgatus [ref_mOTU_v3_02367]	spec	183.27	-0.46857	0.291168	-1.60928	0.107556	0.600647	Case/Ctrl	MG
s__Bacteroides fragilis [ref_mOTU_v3_01597]	spec	9.42416	1.85592	0.708657	2.61893	0.00882052	0.147873	Case/Ctrl	MG
s__Bacteroides massiliensis [ref_mOTU_v3_02135]	spec	32.0272	0.225692	1.022	0.220834	0.825222	0.922932	Case/Ctrl	MG
s__Bacteroides sp. [ref_mOTU_v3_02810]	spec	20.488	0.977936	0.781278	1.25171	0.210674	0.793296	Case/Ctrl	MG
s__Bacteroides sp. [ref_mOTU_v3_03475]	spec	58.2741	0.495869	0.399012	1.24274	0.213963	0.793296	Case/Ctrl	MG
s__Bacteroides species incertae sedis [ext_mOTU_v3_17504]	spec	2.82275	0.83736	0.678594	1.23396	0.217217	0.793296	Case/Ctrl	MG
s__Bacteroides stercoris [ref_mOTU_v3_01579]	spec	64.4542	0.663013	0.895237	0.7406	0.458936	0.852917	Case/Ctrl	MG
s__Bacteroides thetaiotaomicron [ref_mOTU_v3_01657]	spec	29.7556	-0.348362	0.391013	-0.890922	0.372971	0.830444	Case/Ctrl	MG
s__Bacteroides uniformis [ref_mOTU_v3_00855]	spec	238.685	1.23519	0.402128	3.07163	0.00212895	0.0674168	Case/Ctrl	MG
s__Barnesiella intestinihominis [ref_mOTU_v3_03595]	spec	34.1382	0.288857	0.402388	0.717857	0.472845	0.852917	Case/Ctrl	MG
s__Bifidobacterium adolescentis [ref_mOTU_v3_02703]	spec	159.993	-0.163699	0.641697	-0.255103	0.798643	0.922932	Case/Ctrl	MG
s__Bifidobacterium catenulatum/kashiwanohense [ref_mOTU_v3_02701]	spec	9.6166	-0.651722	0.860123	-0.757708	#N/A	#N/A	Case/Ctrl	MG
s__Bifidobacterium dentium [ref_mOTU_v3_02698]	spec	3.71521	1.30125	0.716252	1.81675	0.069256	0.518874	Case/Ctrl	MG
s__Bifidobacterium longum [ref_mOTU_v3_01099]	spec	79.3393	0.126737	0.455213	0.278413	0.780695	0.922932	Case/Ctrl	MG
s__Bifidobacterium ruminantium [ref_mOTU_v3_02702]	spec	71.0689	0.935298	1.03903	0.900162	0.368034	0.830444	Case/Ctrl	MG
s__Bilophila wadsworthia [ref_mOTU_v3_04300]	spec	13.365	0.206486	0.378562	0.545449	0.585445	0.909974	Case/Ctrl	MG
s__Bittarella massiliensis [ref_mOTU_v3_04646]	spec	1.57918	-0.257721	0.249846	-1.03152	0.302296	#N/A	Case/Ctrl	MG
s__Blautia massiliensis [ref_mOTU_v3_03342]	spec	81.6884	0.0769508	0.327975	0.234624	0.8145	0.922932	Case/Ctrl	MG
s__Blautia obeum [ref_mOTU_v3_05139]	spec	50.016	0.11902	0.342633	0.347369	0.728314	0.910945	Case/Ctrl	MG
s__Blautia obeum [ref_mOTU_v3_05140]	spec	12.6095	0.0850788	0.368974	0.230582	0.817639	0.922932	Case/Ctrl	MG
s__Blautia obeum/wexlerae [ref_mOTU_v3_02154]	spec	220.732	-0.126382	0.236005	-0.535507	0.592299	0.909974	Case/Ctrl	MG
s__Butyricicoccus sp. [ref_mOTU_v3_02967]	spec	1.10717	0.125009	0.310073	0.403162	0.686829	#N/A	Case/Ctrl	MG
s__Butyricicoccus species incertae sedis [meta_mOTU_v3_12336]	spec	27.6755	0.0923003	0.274025	0.336832	0.736243	0.910945	Case/Ctrl	MG
s__Butyricicoccus species incertae sedis [meta_mOTU_v3_12617]	spec	9.86857	-0.056836	0.700688	-0.0811145	0.935351	0.968331	Case/Ctrl	MG
s__Clostridia species incertae sedis [ext_mOTU_v3_26753]	spec	0.760384	1.25054	0.452558	2.76326	0.00572266	#N/A	Case/Ctrl	MG
s__Clostridiaceae species incertae sedis [meta_mOTU_v3_12983]	spec	6.77728	0.310105	0.697381	0.444671	0.656558	0.909974	Case/Ctrl	MG
s__Clostridiales Family XIII. Incertae Sedis species incertae sedis [ext_mOTU_v3_16322]	spec	0.813463	0.662719	0.508554	1.30314	0.192526	#N/A	Case/Ctrl	MG
s__Clostridiales Family XIII. Incertae Sedis species incertae sedis [ext_mOTU_v3_16402]	spec	2.2519	0.488456	0.42756	1.14243	0.253276	0.824778	Case/Ctrl	MG
s__Clostridiales Family XIII. Incertae Sedis species incertae sedis [ext_mOTU_v3_17436]	spec	1.26005	0.741034	0.529214	1.40025	0.161438	#N/A	Case/Ctrl	MG
s__Clostridiales Family XIII. Incertae Sedis species incertae sedis [ext_mOTU_v3_17501]	spec	2.95667	-0.65017	0.580022	-1.12094	0.262314	0.828078	Case/Ctrl	MG
s__Clostridiales Family XIII. Incertae Sedis species incertae sedis [ext_mOTU_v3_26457]	spec	2.52383	0.639697	0.586571	1.09057	0.275462	0.828078	Case/Ctrl	MG
s__Clostridiales Family XIII. Incertae Sedis species incertae sedis [ext_mOTU_v3_28958]	spec	1.87041	-0.108939	0.450165	-0.241999	0.808781	#N/A	Case/Ctrl	MG
s__Clostridiales sp. [ref_mOTU_v3_02968]	spec	3.66526	0.191778	0.299802	0.639683	0.522379	0.891485	Case/Ctrl	MG
s__Clostridiales sp. [ref_mOTU_v3_03634]	spec	58.9061	-1.27052	1.02633	-1.23792	0.215745	0.793296	Case/Ctrl	MG
s__Clostridiales sp. [ref_mOTU_v3_03658]	spec	24.9784	-0.693042	0.499321	-1.38797	0.165146	0.706708	Case/Ctrl	MG
s__Clostridiales sp. [ref_mOTU_v3_05137]	spec	5.18926	-0.28816	0.310683	-0.927505	0.353665	0.830444	Case/Ctrl	MG
s__Clostridiales sp. [ref_mOTU_v3_05138]	spec	0.578454	0.851587	0.424801	2.00467	0.0449979	#N/A	Case/Ctrl	MG
s__Clostridiales species incertae sedis [ext_mOTU_v3_16178]	spec	1.0395	0.480797	0.554334	0.867342	0.385755	#N/A	Case/Ctrl	MG
s__Clostridiales species incertae sedis [ext_mOTU_v3_16181]	spec	4.90423	0.488225	0.556419	0.877441	0.380247	0.830937	Case/Ctrl	MG
s__Clostridiales species incertae sedis [ext_mOTU_v3_16216]	spec	5.16602	2.6574	0.705161	3.7685	0.000164231	0.00936115	Case/Ctrl	MG
s__Clostridiales species incertae sedis [ext_mOTU_v3_16417]	spec	1.00236	0.629394	0.426588	1.47541	0.140101	#N/A	Case/Ctrl	MG
s__Clostridiales species incertae sedis [ext_mOTU_v3_16427]	spec	2.08421	0.879116	0.327525	2.68412	0.0072722	0.129536	Case/Ctrl	MG
s__Clostridiales species incertae sedis [ext_mOTU_v3_17441]	spec	1.22829	-0.313365	0.59033	-0.530829	0.595537	#N/A	Case/Ctrl	MG
s__Clostridiales species incertae sedis [ext_mOTU_v3_17443]	spec	2.44981	0.310333	0.680387	0.456112	0.648309	0.909974	Case/Ctrl	MG
s__Clostridiales species incertae sedis [ext_mOTU_v3_17600]	spec	4.3048	-0.0774378	0.780726	-0.099187	#N/A	#N/A	Case/Ctrl	MG
s__Clostridiales species incertae sedis [ext_mOTU_v3_17865]	spec	2.05668	-0.159677	0.658148	-0.242616	0.808303	#N/A	Case/Ctrl	MG
s__Clostridiales species incertae sedis [ext_mOTU_v3_17908]	spec	0.938759	0.962387	0.499089	1.92829	0.0538193	#N/A	Case/Ctrl	MG
s__Clostridiales species incertae sedis [ext_mOTU_v3_17948]	spec	1.08526	0.568836	0.409834	1.38797	0.165147	#N/A	Case/Ctrl	MG
s__Clostridiales species incertae sedis [ext_mOTU_v3_17987]	spec	7.48735	0.345073	0.479096	0.720259	0.471366	0.852917	Case/Ctrl	MG
s__Clostridiales species incertae sedis [ext_mOTU_v3_17995]	spec	1.53886	0.00253096	0.296245	0.00854349	0.993183	#N/A	Case/Ctrl	MG
s__Clostridiales species incertae sedis [ext_mOTU_v3_18011]	spec	0.908826	0.400884	0.527807	0.759528	0.447537	#N/A	Case/Ctrl	MG
s__Clostridiales species incertae sedis [ext_mOTU_v3_18262]	spec	0.553515	-0.182488	0.458666	-0.397868	0.690727	#N/A	Case/Ctrl	MG
s__Clostridiales species incertae sedis [ext_mOTU_v3_24979]	spec	1.51709	-0.290674	0.551552	-0.527011	0.598186	#N/A	Case/Ctrl	MG
s__Clostridiales species incertae sedis [ext_mOTU_v3_26501]	spec	4.54923	0.833069	0.49139	1.69533	0.0900129	0.54736	Case/Ctrl	MG
s__Clostridiales species incertae sedis [ext_mOTU_v3_26505]	spec	1.80261	-0.417694	0.418286	-0.998583	0.317997	#N/A	Case/Ctrl	MG
s__Clostridiales species incertae sedis [ext_mOTU_v3_26520]	spec	3.44417	-0.862739	0.638285	-1.35165	0.176487	0.718553	Case/Ctrl	MG
s__Clostridiales species incertae sedis [ext_mOTU_v3_26595]	spec	1.94805	-0.458681	0.623573	-0.735569	0.461993	#N/A	Case/Ctrl	MG
s__Clostridiales species incertae sedis [ext_mOTU_v3_26617]	spec	1.82276	0.507227	0.545291	0.930196	0.35227	#N/A	Case/Ctrl	MG
s__Clostridiales species incertae sedis [ext_mOTU_v3_26621]	spec	3.08105	0.757766	0.753534	1.00562	0.314601	0.830444	Case/Ctrl	MG
s__Clostridiales species incertae sedis [ext_mOTU_v3_26664]	spec	1.26694	-0.0211236	0.588323	-0.0359047	0.971358	#N/A	Case/Ctrl	MG
s__Clostridiales species incertae sedis [ext_mOTU_v3_26734]	spec	1.63608	-0.771452	0.670844	-1.14997	0.250155	#N/A	Case/Ctrl	MG
s__Clostridiales species incertae sedis [ext_mOTU_v3_26949]	spec	2.2556	-0.423582	0.645276	-0.656436	0.511544	0.88784	Case/Ctrl	MG
s__Clostridiales species incertae sedis [ext_mOTU_v3_28767]	spec	0.727681	-0.120185	0.404291	-0.297275	0.766257	#N/A	Case/Ctrl	MG
s__Clostridiales species incertae sedis [ext_mOTU_v3_33163]	spec	2.00442	1.27116	0.572342	2.22098	0.0263522	#N/A	Case/Ctrl	MG
s__Clostridiales species incertae sedis [meta_mOTU_v3_12252]	spec	49.3218	0.478437	0.509985	0.938138	0.348174	0.830444	Case/Ctrl	MG
s__Clostridiales species incertae sedis [meta_mOTU_v3_12253]	spec	65.8976	1.68232	0.669048	2.5145	0.0119202	0.178803	Case/Ctrl	MG
s__Clostridiales species incertae sedis [meta_mOTU_v3_12254]	spec	87.6728	0.366857	0.848176	0.432524	0.665361	0.909974	Case/Ctrl	MG
s__Clostridiales species incertae sedis [meta_mOTU_v3_12265]	spec	58.7409	-0.274831	0.636738	-0.431624	0.666015	0.909974	Case/Ctrl	MG
s__Clostridiales species incertae sedis [meta_mOTU_v3_12272]	spec	52.2244	1.15137	0.836349	1.37666	0.168618	0.706708	Case/Ctrl	MG
s__Clostridiales species incertae sedis [meta_mOTU_v3_12284]	spec	76.7064	-0.467495	0.434034	-1.07709	0.281439	0.828078	Case/Ctrl	MG
s__Clostridiales species incertae sedis [meta_mOTU_v3_12288]	spec	40.1604	1.18415	0.466804	2.53673	0.0111894	0.177166	Case/Ctrl	MG
s__Clostridiales species incertae sedis [meta_mOTU_v3_12301]	spec	28.2689	0.938333	0.391253	2.39828	0.0164723	0.204114	Case/Ctrl	MG
s__Clostridiales species incertae sedis [meta_mOTU_v3_12307]	spec	15.1885	3.64492	0.698321	5.21954	#N/A	#N/A	Case/Ctrl	MG
s__Clostridiales species incertae sedis [meta_mOTU_v3_12309]	spec	10.3856	-0.270713	0.784457	-0.345097	0.730022	0.910945	Case/Ctrl	MG
s__Clostridiales species incertae sedis [meta_mOTU_v3_12323]	spec	9.06736	-0.314758	0.899943	-0.349753	0.726524	0.910945	Case/Ctrl	MG
s__Clostridiales species incertae sedis [meta_mOTU_v3_12327]	spec	26.636	0.34599	0.802002	0.431408	0.666172	0.909974	Case/Ctrl	MG
s__Clostridiales species incertae sedis [meta_mOTU_v3_12334]	spec	36.881	0.580068	0.674716	0.859721	0.389943	0.830937	Case/Ctrl	MG
s__Clostridiales species incertae sedis [meta_mOTU_v3_12351]	spec	3.00485	0.409218	0.501881	0.815369	0.414861	0.832644	Case/Ctrl	MG
s__Clostridiales species incertae sedis [meta_mOTU_v3_12356]	spec	25.9447	0.672141	0.413137	1.62692	0.103754	0.593649	Case/Ctrl	MG
s__Clostridiales species incertae sedis [meta_mOTU_v3_12361]	spec	26.1337	-0.447617	0.573558	-0.780421	0.435143	0.852917	Case/Ctrl	MG
s__Clostridiales species incertae sedis [meta_mOTU_v3_12371]	spec	16.0632	1.43121	0.959309	1.49192	#N/A	#N/A	Case/Ctrl	MG
s__Clostridiales species incertae sedis [meta_mOTU_v3_12411]	spec	25.276	-0.938583	0.700645	-1.3396	0.180376	0.724044	Case/Ctrl	MG
s__Clostridiales species incertae sedis [meta_mOTU_v3_12437]	spec	47.0131	0.0258923	0.775293	0.0333968	0.973358	0.987214	Case/Ctrl	MG
s__Clostridiales species incertae sedis [meta_mOTU_v3_12445]	spec	2.68333	0.375218	0.316693	1.1848	0.236097	0.793296	Case/Ctrl	MG
s__Clostridiales species incertae sedis [meta_mOTU_v3_12447]	spec	5.09405	-0.982857	0.721026	-1.36314	0.17284	0.713902	Case/Ctrl	MG
s__Clostridiales species incertae sedis [meta_mOTU_v3_12452]	spec	77.0604	0.52664	0.718624	0.732845	0.463653	0.852917	Case/Ctrl	MG
s__Clostridiales species incertae sedis [meta_mOTU_v3_12463]	spec	61.2341	0.207837	0.622183	0.334046	0.738345	0.910945	Case/Ctrl	MG
s__Clostridiales species incertae sedis [meta_mOTU_v3_12473]	spec	4.80439	0.162702	0.812194	0.200324	0.841227	0.922932	Case/Ctrl	MG
s__Clostridiales species incertae sedis [meta_mOTU_v3_12476]	spec	18.6998	-0.174067	0.346764	-0.501976	0.615685	0.909974	Case/Ctrl	MG
s__Clostridiales species incertae sedis [meta_mOTU_v3_12494]	spec	13.9394	-0.468798	0.784147	-0.597845	0.549943	0.900769	Case/Ctrl	MG
s__Clostridiales species incertae sedis [meta_mOTU_v3_12521]	spec	32.6269	1.1947	0.766823	1.55799	0.119236	0.600647	Case/Ctrl	MG
s__Clostridiales species incertae sedis [meta_mOTU_v3_12522]	spec	4.7836	-0.154425	0.517928	-0.298159	0.765582	0.922932	Case/Ctrl	MG
s__Clostridiales species incertae sedis [meta_mOTU_v3_12554]	spec	3.86421	-0.164417	0.369342	-0.445161	0.656204	0.909974	Case/Ctrl	MG
s__Clostridiales species incertae sedis [meta_mOTU_v3_12556]	spec	12.0088	-0.24526	0.556613	-0.440629	0.659482	0.909974	Case/Ctrl	MG
s__Clostridiales species incertae sedis [meta_mOTU_v3_12563]	spec	74.9305	-0.0851579	0.319444	-0.266582	0.789791	0.922932	Case/Ctrl	MG
s__Clostridiales species incertae sedis [meta_mOTU_v3_12623]	spec	7.29679	2.80815	0.809333	3.46971	#N/A	#N/A	Case/Ctrl	MG
s__Clostridiales species incertae sedis [meta_mOTU_v3_12631]	spec	4.70418	0.480141	0.465183	1.03216	0.301999	0.830444	Case/Ctrl	MG
s__Clostridiales species incertae sedis [meta_mOTU_v3_12635]	spec	34.5092	0.224723	0.41953	0.535654	0.592198	0.909974	Case/Ctrl	MG
s__Clostridiales species incertae sedis [meta_mOTU_v3_12668]	spec	13.7528	2.54649	0.591876	4.3024	1.68957e-05	0.00303277	Case/Ctrl	MG
s__Clostridiales species incertae sedis [meta_mOTU_v3_12707]	spec	34.4726	-0.370471	0.481666	-0.769145	0.441807	0.852917	Case/Ctrl	MG
s__Clostridiales species incertae sedis [meta_mOTU_v3_12755]	spec	12.0303	0.724289	0.82497	0.877958	0.379966	0.830937	Case/Ctrl	MG
s__Clostridiales species incertae sedis [meta_mOTU_v3_12776]	spec	7.37823	-1.20734	0.512386	-2.35631	0.0184573	0.217899	Case/Ctrl	MG
s__Clostridiales species incertae sedis [meta_mOTU_v3_12786]	spec	8.37617	0.314333	0.329706	0.953374	0.3404	0.830444	Case/Ctrl	MG
s__Clostridiales species incertae sedis [meta_mOTU_v3_12851]	spec	0.841759	0.535021	0.482268	1.10938	0.267264	#N/A	Case/Ctrl	MG
s__Clostridiales species incertae sedis [meta_mOTU_v3_12873]	spec	30.4888	0.655012	0.961996	0.680888	0.495942	0.87791	Case/Ctrl	MG
s__Clostridiales species incertae sedis [meta_mOTU_v3_12952]	spec	3.41904	1.22838	0.379369	3.23797	0.00120385	0.0490138	Case/Ctrl	MG
s__Clostridiales species incertae sedis [meta_mOTU_v3_13006]	spec	3.15975	0.471058	0.492912	0.955663	0.339243	0.830444	Case/Ctrl	MG
s__Clostridiales species incertae sedis [meta_mOTU_v3_13012]	spec	8.50617	-0.9534	0.805553	-1.18354	0.236597	0.793296	Case/Ctrl	MG
s__Clostridiales species incertae sedis [meta_mOTU_v3_13031]	spec	1.34508	0.198662	0.593502	0.334729	0.73783	#N/A	Case/Ctrl	MG
s__Clostridiales species incertae sedis [meta_mOTU_v3_13115]	spec	3.46039	0.362565	0.671232	0.540149	0.589094	0.909974	Case/Ctrl	MG
s__Clostridiales species incertae sedis [meta_mOTU_v3_13140]	spec	1.00172	0.309175	0.468266	0.660255	0.50909	#N/A	Case/Ctrl	MG
s__Clostridiales species incertae sedis [meta_mOTU_v3_13147]	spec	9.928	-0.733463	0.666352	-1.10071	0.271021	0.828078	Case/Ctrl	MG
s__Clostridiales species incertae sedis [meta_mOTU_v3_13155]	spec	3.36766	-0.102639	0.765969	-0.133999	0.893403	0.941615	Case/Ctrl	MG
s__Clostridiales species incertae sedis [meta_mOTU_v3_13165]	spec	2.18869	1.12514	0.540158	2.08298	0.0372533	0.34249	Case/Ctrl	MG
s__Clostridiales species incertae sedis [meta_mOTU_v3_13168]	spec	13.3671	-0.574792	0.53822	-1.06795	0.285543	0.828078	Case/Ctrl	MG
s__Clostridiales species incertae sedis [meta_mOTU_v3_13187]	spec	11.4679	0.232474	0.621677	0.373947	#N/A	#N/A	Case/Ctrl	MG
s__Clostridiales species incertae sedis [meta_mOTU_v3_13200]	spec	8.88812	0.129528	0.492296	0.26311	0.792466	0.922932	Case/Ctrl	MG
s__Clostridiales species incertae sedis [meta_mOTU_v3_13202]	spec	7.24137	-0.219674	0.86798	-0.253087	0.800201	0.922932	Case/Ctrl	MG
s__Clostridiales species incertae sedis [meta_mOTU_v3_13280]	spec	17.6034	-0.921011	0.881975	-1.04426	0.296365	0.828078	Case/Ctrl	MG
s__Clostridiales species incertae sedis [meta_mOTU_v3_13304]	spec	5.35469	0.573442	0.775764	0.739196	0.459788	0.852917	Case/Ctrl	MG
s__Clostridiales species incertae sedis [meta_mOTU_v3_13377]	spec	3.98938	-0.349216	0.345635	-1.01036	0.312322	0.830444	Case/Ctrl	MG
s__Clostridiales species incertae sedis [meta_mOTU_v3_13390]	spec	15.9783	-0.329354	0.761446	-0.432537	0.665351	0.909974	Case/Ctrl	MG
s__Clostridiales species incertae sedis [meta_mOTU_v3_13415]	spec	7.60029	0.540809	0.637346	0.848533	0.396141	0.830937	Case/Ctrl	MG
s__Clostridiales species incertae sedis [meta_mOTU_v3_13572]	spec	7.44836	2.19181	0.60688	3.6116	0.000304309	0.0144547	Case/Ctrl	MG
s__Clostridiales species incertae sedis [meta_mOTU_v3_13662]	spec	7.62712	0.395366	0.629169	0.628394	0.529746	0.895669	Case/Ctrl	MG
s__Clostridiales species incertae sedis [meta_mOTU_v3_13701]	spec	8.8354	-0.563983	0.583386	-0.96674	0.333674	0.830444	Case/Ctrl	MG
s__Clostridiales species incertae sedis [meta_mOTU_v3_13729]	spec	3.29238	2.07435	0.744494	2.78626	0.005332	0.116894	Case/Ctrl	MG
s__Clostridiales species incertae sedis [meta_mOTU_v3_13774]	spec	3.13895	0.371085	0.689811	0.537953	0.59061	0.909974	Case/Ctrl	MG
s__Clostridiales species incertae sedis [meta_mOTU_v3_13792]	spec	2.75575	1.15111	0.74484	1.54545	0.122237	0.600647	Case/Ctrl	MG
s__Clostridiales species incertae sedis [meta_mOTU_v3_13863]	spec	3.45461	-0.0753035	0.427517	-0.176141	0.860183	0.935695	Case/Ctrl	MG
s__Clostridiales species incertae sedis [meta_mOTU_v3_13922]	spec	4.00214	0.649864	0.7433	0.874296	0.381957	0.830937	Case/Ctrl	MG
s__Clostridiales species incertae sedis [meta_mOTU_v3_13923]	spec	1.68867	1.36364	0.595973	2.28809	0.0221323	#N/A	Case/Ctrl	MG
s__Clostridiales species incertae sedis [meta_mOTU_v3_13955]	spec	6.06241	1.83199	0.786723	2.32863	0.0198785	0.217899	Case/Ctrl	MG
s__Clostridiales species incertae sedis [meta_mOTU_v3_14166]	spec	8.66457	-0.512113	0.322395	-1.58847	0.112181	0.600647	Case/Ctrl	MG
s__Clostridiales species incertae sedis [meta_mOTU_v3_14425]	spec	2.10863	0.294092	0.450646	0.652602	0.514013	0.88784	Case/Ctrl	MG
s__Clostridium phoceensis [ref_mOTU_v3_08865]	spec	14.564	0.0614652	0.259218	0.237117	0.812566	0.922932	Case/Ctrl	MG
s__Clostridium saudiense/disporicum [ref_mOTU_v3_04336]	spec	1.93559	1.39921	0.688562	2.03208	0.042146	#N/A	Case/Ctrl	MG
s__Clostridium sp. [ref_mOTU_v3_03622]	spec	10.3121	-0.187358	0.330332	-0.567183	0.57059	0.909974	Case/Ctrl	MG
s__Clostridium sp. [ref_mOTU_v3_03680]	spec	25.5806	0.204914	0.319913	0.640531	0.521827	0.891485	Case/Ctrl	MG
s__Clostridium sp. CAG:127 [meta_mOTU_v3_12306]	spec	60.8414	-0.120349	0.961752	-0.125135	0.900416	0.943451	Case/Ctrl	MG
s__Clostridium sp. CAG:138 [meta_mOTU_v3_12233]	spec	75.781	0.645578	0.698314	0.924482	0.355235	0.830444	Case/Ctrl	MG
s__Clostridium sp. CAG:217 [meta_mOTU_v3_12270]	spec	88.389	1.09386	1.01883	1.07364	0.282983	0.828078	Case/Ctrl	MG
s__Clostridium sp. CAG:273 [meta_mOTU_v3_12673]	spec	10.8453	1.31764	0.750105	1.75661	0.0789849	0.534188	Case/Ctrl	MG
s__Clostridium sp. CAG:58 [ref_mOTU_v3_07640]	spec	4.41033	-0.715172	0.501415	-1.42631	0.15378	0.706708	Case/Ctrl	MG
s__Clostridium sp. CAG:7 [ref_mOTU_v3_07647]	spec	15.7353	-1.00556	0.405043	-2.4826	0.0130427	0.185858	Case/Ctrl	MG
s__Clostridium sp. Marseille-P3244 [ref_mOTU_v3_10248]	spec	0.538573	0.401399	0.395942	1.01378	0.310687	#N/A	Case/Ctrl	MG
s__Clostridium species incertae sedis [ext_mOTU_v3_17323]	spec	2.21759	0.0951284	0.352601	0.269791	0.787321	0.922932	Case/Ctrl	MG
s__Clostridium species incertae sedis [ext_mOTU_v3_17404]	spec	2.72656	-0.427477	0.403844	-1.05852	0.289818	0.828078	Case/Ctrl	MG
s__Clostridium species incertae sedis [ext_mOTU_v3_17427]	spec	7.51918	-0.115098	0.325412	-0.353701	0.723563	0.910945	Case/Ctrl	MG
s__Clostridium species incertae sedis [ext_mOTU_v3_17477]	spec	2.87647	-0.747957	0.624818	-1.19708	0.231275	0.793296	Case/Ctrl	MG
s__Clostridium species incertae sedis [ext_mOTU_v3_17741]	spec	1.7518	0.563317	0.537843	1.04736	0.294932	#N/A	Case/Ctrl	MG
s__Clostridium species incertae sedis [ext_mOTU_v3_26503]	spec	1.87672	-0.943111	0.411892	-2.28971	0.0220383	#N/A	Case/Ctrl	MG
s__Clostridium species incertae sedis [meta_mOTU_v3_12324]	spec	3.07328	-0.151709	0.662968	-0.228833	0.818999	0.922932	Case/Ctrl	MG
s__Clostridium species incertae sedis [meta_mOTU_v3_12399]	spec	14.3394	-0.191888	0.854818	-0.224478	0.822385	0.922932	Case/Ctrl	MG
s__Clostridium species incertae sedis [meta_mOTU_v3_12417]	spec	30.2268	0.602519	0.501603	1.20119	0.229679	0.793296	Case/Ctrl	MG
s__Clostridium species incertae sedis [meta_mOTU_v3_12640]	spec	18.2005	-0.136329	0.581694	-0.234366	0.814701	0.922932	Case/Ctrl	MG
s__Collinsella aerofaciens [ref_mOTU_v3_03626]	spec	58.3819	-0.275946	0.382872	-0.720725	0.471079	0.852917	Case/Ctrl	MG
s__Collinsella bouchesdurhonensis [ref_mOTU_v3_03627]	spec	6.8887	0.217817	0.634868	0.343089	0.731531	0.910945	Case/Ctrl	MG
s__Collinsella species incertae sedis [ext_mOTU_v3_17329]	spec	3.71623	0.229782	0.747943	0.307218	0.758677	0.922932	Case/Ctrl	MG
s__Collinsella species incertae sedis [ext_mOTU_v3_17334]	spec	4.60758	0.116797	0.455845	0.256221	0.797781	0.922932	Case/Ctrl	MG
s__Collinsella species incertae sedis [ext_mOTU_v3_17335]	spec	3.3149	-0.516165	0.512255	-1.00763	0.313631	0.830444	Case/Ctrl	MG
s__Collinsella species incertae sedis [ext_mOTU_v3_17337]	spec	50.351	0.0836677	0.419659	0.199371	0.841973	0.922932	Case/Ctrl	MG
s__Collinsella species incertae sedis [ext_mOTU_v3_17345]	spec	21.3038	0.63616	0.703408	0.904398	0.365785	0.830444	Case/Ctrl	MG
s__Collinsella species incertae sedis [ext_mOTU_v3_17348]	spec	47.7304	0.196849	0.405302	0.485685	0.62719	0.909974	Case/Ctrl	MG
s__Collinsella species incertae sedis [ext_mOTU_v3_17351]	spec	2.84602	-0.503155	0.709017	-0.709653	0.47792	0.856648	Case/Ctrl	MG
s__Collinsella species incertae sedis [ext_mOTU_v3_17637]	spec	2.01724	-0.244547	0.631446	-0.387281	0.698548	#N/A	Case/Ctrl	MG
s__Collinsella species incertae sedis [ext_mOTU_v3_26711]	spec	7.50273	-0.76764	0.84025	-0.913586	0.360935	0.830444	Case/Ctrl	MG
s__Collinsella species incertae sedis [ext_mOTU_v3_28721]	spec	1.60362	0.199174	0.616506	0.323069	0.746643	#N/A	Case/Ctrl	MG
s__Collinsella species incertae sedis [meta_mOTU_v3_12451]	spec	6.29808	-0.0916772	0.62309	-0.147133	0.883027	0.941615	Case/Ctrl	MG
s__Coprobacillus cateniformis [ref_mOTU_v3_03929]	spec	2.03844	0.99771	0.737055	1.35364	0.17585	#N/A	Case/Ctrl	MG
s__Coprobacter fastidiosus [ref_mOTU_v3_03667]	spec	2.88021	1.6403	0.572399	2.86566	0.00416146	0.0988347	Case/Ctrl	MG
s__Coprococcus catus [ref_mOTU_v3_11851]	spec	24.6449	0.0975297	0.411357	0.237093	0.812585	0.922932	Case/Ctrl	MG
s__Coprococcus comes [ref_mOTU_v3_03690]	spec	50.5788	-0.0655763	0.411872	-0.159215	0.873499	0.941615	Case/Ctrl	MG
s__Coprococcus eutactus [ref_mOTU_v3_02378]	spec	40.3018	0.905521	1.05621	0.85733	0.391263	0.830937	Case/Ctrl	MG
s__Coriobacteriia species incertae sedis [ext_mOTU_v3_26765]	spec	4.05553	-0.792934	0.655387	-1.20987	0.226328	0.793296	Case/Ctrl	MG
s__Desulfovibrio species incertae sedis [ext_mOTU_v3_16415]	spec	2.01102	0.679917	0.563407	1.2068	0.227511	#N/A	Case/Ctrl	MG
s__Dialister invisus [ref_mOTU_v3_03691]	spec	64.4369	-0.508081	1.04456	-0.486407	0.626678	0.909974	Case/Ctrl	MG
s__Dorea formicigenerans [ref_mOTU_v3_03668]	spec	27.2469	-0.221974	0.272212	-0.815446	0.414817	0.832644	Case/Ctrl	MG
s__Dorea longicatena [ref_mOTU_v3_03692]	spec	68.0343	-0.217897	0.426957	-0.510348	0.609807	0.909974	Case/Ctrl	MG
s__Dorea longicatena [ref_mOTU_v3_03693]	spec	20.6153	-0.8997	0.486388	-1.84976	0.0643484	0.495656	Case/Ctrl	MG
s__Eggerthella lenta [ref_mOTU_v3_00719]	spec	12.2715	0.829589	0.510496	1.62506	0.104149	0.593649	Case/Ctrl	MG
s__Eggerthella species incertae sedis [meta_mOTU_v3_12316]	spec	34.0405	-0.257506	0.700913	-0.367386	0.713331	0.910945	Case/Ctrl	MG
s__Eggerthellaceae species incertae sedis [ext_mOTU_v3_15443]	spec	9.53823	-0.277153	0.368038	-0.753055	0.451417	0.852917	Case/Ctrl	MG
s__Eggerthellaceae species incertae sedis [ext_mOTU_v3_16295]	spec	3.12435	0.31161	0.297676	1.04681	0.295188	0.828078	Case/Ctrl	MG
s__Eggerthellaceae species incertae sedis [ext_mOTU_v3_17307]	spec	4.32129	-0.838507	0.594029	-1.41156	0.15808	0.706708	Case/Ctrl	MG
s__Eggerthellaceae species incertae sedis [ext_mOTU_v3_17308]	spec	2.75574	0.499581	0.558608	0.894333	0.371144	0.830444	Case/Ctrl	MG
s__Eggerthellaceae species incertae sedis [ext_mOTU_v3_17907]	spec	8.60526	1.36436	0.722481	1.88844	0.0589675	0.484959	Case/Ctrl	MG
s__Eggerthellaceae species incertae sedis [meta_mOTU_v3_12569]	spec	20.0687	-0.529067	0.576783	-0.917272	0.359	0.830444	Case/Ctrl	MG
s__Eggerthellaceae species incertae sedis [meta_mOTU_v3_13204]	spec	29.2608	0.00144592	0.497649	0.00290551	0.997682	0.999877	Case/Ctrl	MG
s__Eisenbergiella tayi [ref_mOTU_v3_03446]	spec	2.00007	1.04549	0.52841	1.97856	0.0478661	#N/A	Case/Ctrl	MG
s__Erysipelatoclostridium ramosum [ref_mOTU_v3_03439]	spec	2.60909	0.0996869	0.740491	0.134623	0.89291	0.941615	Case/Ctrl	MG
s__Erysipelotrichaceae species incertae sedis [ext_mOTU_v3_16223]	spec	1.67143	-0.629677	0.435332	-1.44643	0.148057	#N/A	Case/Ctrl	MG
s__Escherichia coli [ref_mOTU_v3_00095]	spec	85.3041	2.50469	0.627801	3.98963	6.61759e-05	0.00628672	Case/Ctrl	MG
s__Eubacteriaceae bacterium CHKCI005 [ref_mOTU_v3_09413]	spec	0.897111	0.306863	0.444213	0.690803	0.48969	#N/A	Case/Ctrl	MG
s__Eubacterium ramulus [ref_mOTU_v3_03570]	spec	16.5036	-0.948555	0.442925	-2.14157	0.0322281	0.306167	Case/Ctrl	MG
s__Eubacterium sp. [ref_mOTU_v3_03633]	spec	5.81954	1.13698	0.629745	1.80545	0.0710038	0.518874	Case/Ctrl	MG
s__Eubacterium sp. CAG:156 [ref_mOTU_v3_07673]	spec	3.2844	-0.43771	0.744115	-0.588229	0.556379	0.906102	Case/Ctrl	MG
s__Eubacterium sp. CAG:180 [ref_mOTU_v3_07675]	spec	87.6512	0.784667	0.96107	0.816451	0.414242	0.832644	Case/Ctrl	MG
s__Eubacterium sp. CAG:202 [meta_mOTU_v3_12308]	spec	179.358	1.12987	1.19317	0.946947	0.343666	0.830444	Case/Ctrl	MG
s__Eubacterium sp. CAG:38 [ref_mOTU_v3_07679]	spec	15.2068	-0.352494	0.484963	-0.726847	0.46732	0.852917	Case/Ctrl	MG
s__Eubacterium species incertae sedis [ext_mOTU_v3_16236]	spec	41.5697	0.218581	0.449248	0.486548	0.626579	0.909974	Case/Ctrl	MG
s__Eubacterium species incertae sedis [meta_mOTU_v3_12260]	spec	8.05901	0.0608797	0.700965	0.0868513	0.93079	0.968157	Case/Ctrl	MG
s__Eubacterium species incertae sedis [meta_mOTU_v3_12314]	spec	15.0987	0.139844	0.481656	0.29034	0.771556	0.922932	Case/Ctrl	MG
s__Eubacterium species incertae sedis [meta_mOTU_v3_13196]	spec	7.26355	0.82905	0.596022	1.39097	0.164234	0.706708	Case/Ctrl	MG
s__Eubacterium ventriosum [ref_mOTU_v3_11151]	spec	11.756	0.0144929	0.5321	0.0272371	0.978271	0.988678	Case/Ctrl	MG
s__Faecalibacterium prausnitzii [ref_mOTU_v3_06108]	spec	165.949	-0.0525885	0.375005	-0.140234	0.888475	0.941615	Case/Ctrl	MG
s__Faecalibacterium prausnitzii [ref_mOTU_v3_06109]	spec	149.451	-0.219771	0.505207	-0.435012	0.663554	0.909974	Case/Ctrl	MG
s__Faecalibacterium prausnitzii [ref_mOTU_v3_06110]	spec	145.814	-1.08236	0.450875	-2.40058	0.016369	0.204114	Case/Ctrl	MG
s__Faecalibacterium prausnitzii [ref_mOTU_v3_06112]	spec	211.81	0.0273104	0.403949	0.0676084	0.946097	0.973421	Case/Ctrl	MG
s__Faecalibacterium sp. [ref_mOTU_v3_03636]	spec	112.923	0.00562851	0.871405	0.00645912	0.994846	0.999877	Case/Ctrl	MG
s__Faecalibacterium species incertae sedis [ext_mOTU_v3_18130]	spec	7.45917	-0.0599249	0.664818	-0.0901372	0.928178	0.968157	Case/Ctrl	MG
s__Faecalibacterium species incertae sedis [ext_mOTU_v3_26216]	spec	7.32897	0.322358	0.66294	0.486255	0.626786	0.909974	Case/Ctrl	MG
s__Faecalibacterium species incertae sedis [meta_mOTU_v3_12325]	spec	100.153	0.0725221	0.465372	0.155837	0.876162	0.941615	Case/Ctrl	MG
s__Faecalibacterium species incertae sedis [meta_mOTU_v3_12331]	spec	40.9873	-1.06468	0.594273	-1.79157	0.0732011	0.521558	Case/Ctrl	MG
s__Faecalibacterium species incertae sedis [meta_mOTU_v3_12403]	spec	41.6204	0.176084	0.570102	0.308865	0.757425	0.922932	Case/Ctrl	MG
s__Faecalicatena contorta [ref_mOTU_v3_03445]	spec	1.59987	1.97857	0.435591	4.54227	5.56521e-06	#N/A	Case/Ctrl	MG
s__Firmicutes bacterium ADurb.Bin467 [meta_mOTU_v3_12694]	spec	2.64719	-0.188802	0.561345	-0.336338	0.736616	0.910945	Case/Ctrl	MG
s__Firmicutes bacterium CAG:102 [ref_mOTU_v3_07726]	spec	9.69333	-0.604651	0.613891	-0.984949	0.324649	0.830444	Case/Ctrl	MG
s__Firmicutes sp. [ref_mOTU_v3_02374]	spec	29.106	0.100039	0.741459	0.134922	0.892674	0.941615	Case/Ctrl	MG
s__Firmicutes sp. [ref_mOTU_v3_02743]	spec	1.36858	0.365787	0.392634	0.931623	0.351531	#N/A	Case/Ctrl	MG
s__Firmicutes sp. [ref_mOTU_v3_03629]	spec	13.7419	0.72314	0.852902	0.847858	0.396517	0.830937	Case/Ctrl	MG
s__Firmicutes sp. [ref_mOTU_v3_03641]	spec	25.6027	-0.123194	0.936658	-0.131525	0.89536	0.941615	Case/Ctrl	MG
s__Firmicutes species incertae sedis [ext_mOTU_v3_26597]	spec	6.90057	0.360151	0.657789	0.547518	0.584023	0.909974	Case/Ctrl	MG
s__Firmicutes species incertae sedis [ext_mOTU_v3_26969]	spec	2.95748	0.473047	0.496346	0.953059	0.34056	0.830444	Case/Ctrl	MG
s__Firmicutes species incertae sedis [meta_mOTU_v3_12285]	spec	25.7403	-1.28366	0.884138	-1.45188	0.146536	0.696046	Case/Ctrl	MG
s__Firmicutes species incertae sedis [meta_mOTU_v3_12845]	spec	1.91322	0.630306	0.511049	1.23336	0.217443	#N/A	Case/Ctrl	MG
s__Firmicutes species incertae sedis [meta_mOTU_v3_13945]	spec	2.24192	0.297532	0.496953	0.598712	0.549365	0.900769	Case/Ctrl	MG
s__Flavonifractor plautii [ref_mOTU_v3_02971]	spec	7.47486	0.58037	0.373563	1.5536	0.120279	0.600647	Case/Ctrl	MG
s__Flavonifractor plautii [ref_mOTU_v3_05238]	spec	3.29225	0.317506	0.343027	0.9256	0.354654	0.830444	Case/Ctrl	MG
s__Flavonifractor species incertae sedis [ext_mOTU_v3_17315]	spec	4.48854	-0.307242	0.468064	-0.656409	0.511561	0.88784	Case/Ctrl	MG
s__Flavonifractor species incertae sedis [ext_mOTU_v3_17316]	spec	2.01301	-0.690337	0.444392	-1.55344	0.120318	#N/A	Case/Ctrl	MG
s__Fusicatenibacter saccharivorans [ref_mOTU_v3_02680]	spec	28.9417	-0.804723	0.767136	-1.049	0.29418	0.828078	Case/Ctrl	MG
s__Gemella sanguinis [ref_mOTU_v3_04303]	spec	0.407459	0.360777	0.427742	0.843445	0.39898	#N/A	Case/Ctrl	MG
s__Haemophilus parainfluenzae [ref_mOTU_v3_01068]	spec	1.16395	-0.641423	0.601492	-1.06639	0.286249	#N/A	Case/Ctrl	MG
s__Holdemanella biformis [meta_mOTU_v3_12329]	spec	67.9896	0.158205	0.762263	0.207547	0.835583	0.922932	Case/Ctrl	MG
s__Holdemania filiformis [ref_mOTU_v3_05921]	spec	1.51647	0.526446	0.40045	1.31464	0.188632	#N/A	Case/Ctrl	MG
s__Holdemania sp. Marseille-P2844 [ref_mOTU_v3_05920]	spec	0.862586	-0.88669	0.562254	-1.57703	0.11479	#N/A	Case/Ctrl	MG
s__Intestinibacter bartlettii [ref_mOTU_v3_03687]	spec	6.27792	0.177202	0.461846	0.383681	0.701215	0.910945	Case/Ctrl	MG
s__Intestinimonas butyriciproducens [ref_mOTU_v3_03928]	spec	1.48756	0.380342	0.349467	1.08835	0.276441	#N/A	Case/Ctrl	MG
s__Intestinimonas massiliensis [ref_mOTU_v3_02970]	spec	2.22869	0.490588	0.544085	0.901676	0.367229	0.830444	Case/Ctrl	MG
s__Lachnospiraceae species incertae sedis [ext_mOTU_v3_16177]	spec	9.37957	0.0993329	0.511028	0.194379	0.845879	0.923661	Case/Ctrl	MG
s__Lachnospiraceae species incertae sedis [ext_mOTU_v3_16248]	spec	13.3052	0.111382	0.316536	0.351879	0.724929	0.910945	Case/Ctrl	MG
s__Lachnospiraceae species incertae sedis [ext_mOTU_v3_16262]	spec	0.806472	-0.65563	0.428212	-1.53109	0.125748	#N/A	Case/Ctrl	MG
s__Lachnospiraceae species incertae sedis [ext_mOTU_v3_16268]	spec	0.892031	-0.567935	0.526885	-1.07791	0.281074	#N/A	Case/Ctrl	MG
s__Lachnospiraceae species incertae sedis [ext_mOTU_v3_17428]	spec	1.55252	-0.242159	0.526902	-0.45959	0.645811	#N/A	Case/Ctrl	MG
s__Lachnospiraceae species incertae sedis [ext_mOTU_v3_17986]	spec	7.3199	0.239483	0.5445	0.439822	0.660066	0.909974	Case/Ctrl	MG
s__Lachnospiraceae species incertae sedis [ext_mOTU_v3_26654]	spec	3.97224	-0.371002	0.660321	-0.561851	0.574217	0.909974	Case/Ctrl	MG
s__Lachnospiraceae species incertae sedis [meta_mOTU_v3_12240]	spec	157.788	0.10468	0.281453	0.371927	0.709947	0.910945	Case/Ctrl	MG
s__Lactobacillus sakei [ref_mOTU_v3_01607]	spec	1.1813	0.459333	0.563419	0.81526	0.414923	#N/A	Case/Ctrl	MG
s__Lactococcus lactis [ref_mOTU_v3_01300]	spec	2.26762	-0.276185	0.445712	-0.61965	0.535488	0.895669	Case/Ctrl	MG
s__Lactococcus lactis [ref_mOTU_v3_01301]	spec	1.93789	-1.0126	0.67447	-1.50133	0.13327	#N/A	Case/Ctrl	MG
s__Lentisphaerae species incertae sedis [meta_mOTU_v3_12568]	spec	2.43397	-0.187107	0.537494	-0.348111	0.727757	0.910945	Case/Ctrl	MG
s__Massilimaliae massiliensis [ref_mOTU_v3_10172]	spec	0.533812	0.431565	0.429468	1.00488	0.314953	#N/A	Case/Ctrl	MG
s__Massilioclostridium coli [ref_mOTU_v3_10237]	spec	1.26717	0.0796414	0.284283	0.280148	0.779364	#N/A	Case/Ctrl	MG
s__Methanobrevibacter smithii [ref_mOTU_v3_03695]	spec	49.6111	1.33972	0.858717	1.56014	0.118728	0.600647	Case/Ctrl	MG
s__Mogibacterium species incertae sedis [meta_mOTU_v3_12290]	spec	0.992616	0.425686	0.358308	1.18805	0.234815	#N/A	Case/Ctrl	MG
s__Odoribacter splanchnicus [ref_mOTU_v3_03697]	spec	11.4173	0.115225	0.222075	0.518856	0.603861	0.909974	Case/Ctrl	MG
s__Oscillibacter sp. [ref_mOTU_v3_03341]	spec	19.7355	0.529123	0.309108	1.71178	0.0869378	0.54736	Case/Ctrl	MG
s__Oscillibacter sp. [ref_mOTU_v3_04664]	spec	85.369	0.0783682	0.472871	0.165729	0.868371	0.94101	Case/Ctrl	MG
s__Oscillibacter sp. 57_20 [meta_mOTU_v3_12282]	spec	3.27911	-0.349374	0.418121	-0.83558	0.403391	0.832644	Case/Ctrl	MG
s__Oscillibacter sp. 57_20 [meta_mOTU_v3_12610]	spec	25.7695	0.209952	0.508651	0.412763	0.67978	0.910945	Case/Ctrl	MG
s__Oscillibacter sp. 57_20 [ref_mOTU_v3_10413]	spec	2.92265	0.685087	0.495175	1.38353	0.166504	0.706708	Case/Ctrl	MG
s__Oscillibacter species incertae sedis [ext_mOTU_v3_16208]	spec	3.63807	-0.280307	0.467111	-0.600087	0.548448	0.900769	Case/Ctrl	MG
s__Oscillibacter species incertae sedis [ext_mOTU_v3_16336]	spec	1.20661	0.401032	0.409664	0.97893	0.327615	#N/A	Case/Ctrl	MG
s__Oscillibacter species incertae sedis [ext_mOTU_v3_17444]	spec	2.0761	0.556316	0.456433	1.21883	0.222907	#N/A	Case/Ctrl	MG
s__Oscillibacter species incertae sedis [ext_mOTU_v3_17445]	spec	1.44001	-0.111664	0.565442	-0.19748	0.843452	#N/A	Case/Ctrl	MG
s__Oscillibacter species incertae sedis [ext_mOTU_v3_17772]	spec	1.9095	-0.0263168	0.595041	-0.0442269	0.964724	#N/A	Case/Ctrl	MG
s__Oscillibacter species incertae sedis [ext_mOTU_v3_17930]	spec	2.66856	0.451455	0.259232	1.74151	0.0815945	0.534188	Case/Ctrl	MG
s__Oscillibacter species incertae sedis [ext_mOTU_v3_17998]	spec	3.42584	0.000112676	0.732956	0.000153728	0.999877	0.999877	Case/Ctrl	MG
s__Oscillibacter species incertae sedis [ext_mOTU_v3_18125]	spec	5.9956	-0.216006	0.458153	-0.471472	0.637304	0.909974	Case/Ctrl	MG
s__Oscillibacter species incertae sedis [ext_mOTU_v3_28927]	spec	1.59824	-0.417842	0.477659	-0.874771	0.381698	#N/A	Case/Ctrl	MG
s__Parabacteroides distasonis [ref_mOTU_v3_03640]	spec	34.4428	0.0693928	0.336407	0.206276	0.836575	0.922932	Case/Ctrl	MG
s__Parabacteroides merdae [ref_mOTU_v3_05401]	spec	32.9462	0.500586	0.45948	1.08946	0.27595	0.828078	Case/Ctrl	MG
s__Parabacteroides species incertae sedis [ext_mOTU_v3_26659]	spec	1.69453	-0.165781	0.584672	-0.283546	0.776758	#N/A	Case/Ctrl	MG
s__Parabacteroides species incertae sedis [ext_mOTU_v3_26689]	spec	2.53998	-0.607409	0.645567	-0.940893	0.34676	0.830444	Case/Ctrl	MG
s__Paraprevotella clara [ref_mOTU_v3_03698]	spec	13.1223	0.933402	0.928111	1.0057	0.314559	0.830444	Case/Ctrl	MG
s__Parasutterella excrementihominis [ref_mOTU_v3_03674]	spec	2.80863	0.426713	0.552228	0.772711	0.439694	0.852917	Case/Ctrl	MG
s__Peptostreptococcaceae species incertae sedis [meta_mOTU_v3_13426]	spec	2.95034	0.558075	0.765182	0.729337	0.465796	0.852917	Case/Ctrl	MG
s__Phocea massiliensis [ref_mOTU_v3_05236]	spec	0.927951	0.192285	0.367808	0.522785	0.601124	#N/A	Case/Ctrl	MG
s__Prevotella copri [ref_mOTU_v3_03701]	spec	287.988	-0.953721	0.842382	-1.13217	0.257562	0.824778	Case/Ctrl	MG
s__Prevotella species incertae sedis [meta_mOTU_v3_12332]	spec	178.891	-2.96822	1.18659	-2.50146	#N/A	#N/A	Case/Ctrl	MG
s__Pseudoflavonifractor capillosus [ref_mOTU_v3_02969]	spec	0.93091	-0.164167	0.435971	-0.376555	0.706504	#N/A	Case/Ctrl	MG
s__Pseudoflavonifractor species incertae sedis [meta_mOTU_v3_14283]	spec	4.30738	-0.149132	0.397653	-0.375029	0.707639	0.910945	Case/Ctrl	MG
s__Rikenellaceae sp. [ref_mOTU_v3_03593]	spec	13.0583	-0.584867	0.773262	-0.756364	0.449431	0.852917	Case/Ctrl	MG
s__Romboutsia timonensis [ref_mOTU_v3_09389]	spec	5.10277	1.07091	0.446369	2.39916	0.0164326	0.204114	Case/Ctrl	MG
s__Roseburia hominis [ref_mOTU_v3_00861]	spec	24.2327	-0.755007	0.385579	-1.95811	0.0502168	0.433691	Case/Ctrl	MG
s__Roseburia intestinalis [ref_mOTU_v3_03702]	spec	44.78	-0.958685	0.565932	-1.69399	0.0902664	0.54736	Case/Ctrl	MG
s__Roseburia inulinivorans [ref_mOTU_v3_00860]	spec	53.9802	-0.631063	0.39863	-1.58308	0.113403	0.600647	Case/Ctrl	MG
s__Roseburia sp. [ref_mOTU_v3_03649]	spec	4.32761	-0.531113	0.757624	-0.701024	0.483288	0.860857	Case/Ctrl	MG
s__Roseburia sp. [ref_mOTU_v3_03650]	spec	34.0882	-0.922658	0.601693	-1.53344	#N/A	#N/A	Case/Ctrl	MG
s__Roseburia sp. 40_7 [meta_mOTU_v3_12352]	spec	37.1541	0.0946691	0.466806	0.202802	0.83929	0.922932	Case/Ctrl	MG
s__Roseburia species incertae sedis [ext_mOTU_v3_17371]	spec	9.59518	-0.307028	0.843542	-0.363974	0.715877	0.910945	Case/Ctrl	MG
s__Roseburia species incertae sedis [ext_mOTU_v3_17394]	spec	2.61976	-0.537901	0.580738	-0.926237	0.354323	0.830444	Case/Ctrl	MG
s__Roseburia species incertae sedis [meta_mOTU_v3_12366]	spec	150.211	0.198327	0.503186	0.394142	0.693476	0.910945	Case/Ctrl	MG
s__Rothia mucilaginosa [ref_mOTU_v3_05265]	spec	0.629574	0.0893444	0.399785	0.223481	0.823161	#N/A	Case/Ctrl	MG
s__Ruminococcaceae bacterium D16 [ref_mOTU_v3_11463]	spec	1.53839	0.858018	0.602471	1.42417	0.154399	#N/A	Case/Ctrl	MG
s__Ruminococcaceae species incertae sedis [ext_mOTU_v3_16202]	spec	1.82167	1.64661	0.66425	2.47891	#N/A	#N/A	Case/Ctrl	MG
s__Ruminococcaceae species incertae sedis [ext_mOTU_v3_16259]	spec	0.695385	0.155555	0.418314	0.371861	0.709996	#N/A	Case/Ctrl	MG
s__Ruminococcaceae species incertae sedis [ext_mOTU_v3_16263]	spec	5.33275	0.389928	0.342577	1.13822	0.255029	0.824778	Case/Ctrl	MG
s__Ruminococcaceae species incertae sedis [ext_mOTU_v3_16287]	spec	1.88654	1.14138	0.523163	2.1817	#N/A	#N/A	Case/Ctrl	MG
s__Ruminococcaceae species incertae sedis [ext_mOTU_v3_16294]	spec	0.644849	0.157368	0.420815	0.37396	0.708434	#N/A	Case/Ctrl	MG
s__Ruminococcaceae species incertae sedis [ext_mOTU_v3_16365]	spec	0.98302	0.555404	0.359748	1.54387	0.12262	#N/A	Case/Ctrl	MG
s__Ruminococcaceae species incertae sedis [ext_mOTU_v3_17317]	spec	0.77283	-1.10762	0.501427	-2.20893	0.0271794	#N/A	Case/Ctrl	MG
s__Ruminococcaceae species incertae sedis [ext_mOTU_v3_17393]	spec	4.00812	0.356136	0.436543	0.815811	0.414608	0.832644	Case/Ctrl	MG
s__Ruminococcaceae species incertae sedis [ext_mOTU_v3_17414]	spec	1.91559	0.506682	0.515711	0.982491	0.325858	#N/A	Case/Ctrl	MG
s__Ruminococcaceae species incertae sedis [ext_mOTU_v3_17494]	spec	3.34978	0.22328	0.518603	0.430542	0.666802	0.909974	Case/Ctrl	MG
s__Ruminococcaceae species incertae sedis [ext_mOTU_v3_17811]	spec	2.24619	-0.107401	0.522626	-0.205503	0.837179	0.922932	Case/Ctrl	MG
s__Ruminococcaceae species incertae sedis [ext_mOTU_v3_17884]	spec	1.0587	0.0261814	0.368427	0.0710628	0.943348	#N/A	Case/Ctrl	MG
s__Ruminococcaceae species incertae sedis [ext_mOTU_v3_17886]	spec	4.2509	-0.147692	0.605236	-0.244024	0.807212	0.922932	Case/Ctrl	MG
s__Ruminococcaceae species incertae sedis [ext_mOTU_v3_17927]	spec	3.05389	1.36257	0.449298	3.03267	0.00242404	0.0690851	Case/Ctrl	MG
s__Ruminococcaceae species incertae sedis [ext_mOTU_v3_18070]	spec	1.46887	0.152922	0.469763	0.32553	0.74478	#N/A	Case/Ctrl	MG
s__Ruminococcaceae species incertae sedis [ext_mOTU_v3_33174]	spec	2.25551	0.993152	0.426325	2.32957	0.0198291	0.217899	Case/Ctrl	MG
s__Ruminococcaceae species incertae sedis [meta_mOTU_v3_12239]	spec	242.491	0.245246	0.374099	0.655565	0.512104	0.88784	Case/Ctrl	MG
s__Ruminococcaceae species incertae sedis [meta_mOTU_v3_12259]	spec	132.383	-0.24465	0.424487	-0.576342	0.564384	0.909974	Case/Ctrl	MG
s__Ruminococcaceae species incertae sedis [meta_mOTU_v3_12264]	spec	32.0767	0.332074	0.88507	0.375195	0.707516	0.910945	Case/Ctrl	MG
s__Ruminococcaceae species incertae sedis [meta_mOTU_v3_12286]	spec	21.6374	-0.0221496	0.443506	-0.0499421	0.960169	0.980817	Case/Ctrl	MG
s__Ruminococcaceae species incertae sedis [meta_mOTU_v3_12396]	spec	15.5502	1.00147	0.800952	1.25035	0.211173	0.793296	Case/Ctrl	MG
s__Ruminococcaceae species incertae sedis [meta_mOTU_v3_12789]	spec	3.806	0.939233	0.504823	1.86052	0.0628122	0.495656	Case/Ctrl	MG
s__Ruminococcaceae species incertae sedis [meta_mOTU_v3_12898]	spec	1.5804	0.494385	0.518967	0.952631	0.340777	#N/A	Case/Ctrl	MG
s__Ruminococcaceae species incertae sedis [meta_mOTU_v3_13455]	spec	2.75911	1.23252	0.549282	2.24387	0.0248405	0.262206	Case/Ctrl	MG
s__Ruminococcus bicirculans [ref_mOTU_v3_02792]	spec	121.143	-0.168204	0.576375	-0.291832	0.770415	0.922932	Case/Ctrl	MG
s__Ruminococcus bromii [ref_mOTU_v3_00853]	spec	430.598	0.36033	0.687048	0.524461	0.599958	0.909974	Case/Ctrl	MG
s__Ruminococcus lactaris [ref_mOTU_v3_01595]	spec	28.3202	-0.390818	0.633676	-0.616747	0.537402	0.895669	Case/Ctrl	MG
s__Ruminococcus sp. [ref_mOTU_v3_03681]	spec	5.64528	-1.43398	0.761112	-1.88406	0.0595563	0.484959	Case/Ctrl	MG
s__Ruminococcus sp. CAG:177 [meta_mOTU_v3_12400]	spec	96.7018	0.480512	0.929436	0.516994	0.605161	0.909974	Case/Ctrl	MG
s__Ruminococcus species incertae sedis [ext_mOTU_v3_26707]	spec	20.0016	1.24089	0.953357	1.3016	0.193053	0.764168	Case/Ctrl	MG
s__Ruthenibacterium lactatiformans [ref_mOTU_v3_04716]	spec	16.2568	0.793813	0.367034	2.16278	0.0305583	0.306167	Case/Ctrl	MG
s__Senegalimassilia anaerobia [ref_mOTU_v3_06538]	spec	6.88385	-0.158781	0.589097	-0.269533	0.78752	0.922932	Case/Ctrl	MG
s__Streptococcus gordonii [ref_mOTU_v3_03970]	spec	0.525782	0.213061	0.492389	0.432709	0.665226	#N/A	Case/Ctrl	MG
s__Streptococcus parasanguinis [ref_mOTU_v3_00312]	spec	5.82345	0.636282	0.366411	1.73652	0.0824711	0.534188	Case/Ctrl	MG
s__Streptococcus salivarius [ref_mOTU_v3_01350]	spec	15.9548	1.60091	0.416171	3.84676	0.000119689	0.00852785	Case/Ctrl	MG
s__Streptococcus sanguinis [ref_mOTU_v3_01591]	spec	0.545715	-0.188548	0.429041	-0.439464	0.660325	#N/A	Case/Ctrl	MG
s__Streptococcus sp. [ref_mOTU_v3_00283]	spec	1.27605	-0.277096	0.359343	-0.77112	0.440636	#N/A	Case/Ctrl	MG
s__Streptococcus thermophilus [ref_mOTU_v3_01348]	spec	12.8901	-1.12223	0.411777	-2.72532	0.00642382	0.122053	Case/Ctrl	MG
s__Sutterella wadsworthensis [ref_mOTU_v3_03066]	spec	13.4552	0.0661691	0.847278	0.0780961	0.937752	0.968331	Case/Ctrl	MG
s__uncultured Blautia sp. [ref_mOTU_v3_03662]	spec	2.67562	0.315575	0.573892	0.549886	0.582398	0.909974	Case/Ctrl	MG
s__uncultured Blautia sp. [ref_mOTU_v3_11916]	spec	4.7628	1.85192	0.435644	4.25099	2.12826e-05	0.00303277	Case/Ctrl	MG
s__uncultured Clostridium sp. [ref_mOTU_v3_06391]	spec	1.86521	-0.697861	0.399414	-1.74721	0.0806007	#N/A	Case/Ctrl	MG
s__uncultured Clostridium sp. [ref_mOTU_v3_11606]	spec	1.74496	-0.210528	0.456482	-0.461196	0.644658	#N/A	Case/Ctrl	MG
s__uncultured Clostridium sp. [ref_mOTU_v3_11607]	spec	1.81627	0.0900427	0.567514	0.158661	0.873936	#N/A	Case/Ctrl	MG
s__uncultured Eubacterium sp. [meta_mOTU_v3_13514]	spec	12.9919	0.164085	0.381739	0.429837	0.667314	0.909974	Case/Ctrl	MG
s__uncultured Eubacterium sp. [ref_mOTU_v3_08868]	spec	2.45677	-0.132716	0.336431	-0.394482	0.693226	0.910945	Case/Ctrl	MG
s__Veillonella atypica [ref_mOTU_v3_01941]	spec	0.453087	-0.0795123	0.426678	-0.186352	0.852169	#N/A	Case/Ctrl	MG
s__Veillonella parvula [ref_mOTU_v3_01938]	spec	1.03957	1.04859	0.481164	2.17927	0.0293114	#N/A	Case/Ctrl	MG
s__[Clostridium] asparagiforme/lavalense [ref_mOTU_v3_06317]	spec	1.25593	0.325653	0.407175	0.799785	0.423836	0.887855	PD/Ctrl	MG
s__[Clostridium] citroniae [ref_mOTU_v3_04828]	spec	0.75558	-0.213599	0.390343	-0.547207	0.584236	0.887855	PD/Ctrl	MG
s__[Clostridium] clostridioforme/bolteae [ref_mOTU_v3_03442]	spec	3.66415	-0.493088	0.545482	-0.903949	0.366023	0.887855	PD/Ctrl	MG
s__[Clostridium] glycyrrhizinilyticum [ref_mOTU_v3_03672]	spec	1.2163	0.184688	0.592522	0.311698	0.75527	0.94187	PD/Ctrl	MG
s__[Clostridium] leptum [ref_mOTU_v3_03688]	spec	3.6282	0.320896	0.381354	0.841466	0.400087	0.887855	PD/Ctrl	MG
s__[Clostridium] scindens [ref_mOTU_v3_03437]	spec	2.59496	2.31432	0.697007	3.32036	#N/A	#N/A	PD/Ctrl	MG
s__[Clostridium] spiroforme [ref_mOTU_v3_11181]	spec	1.38532	-0.909945	0.714923	-1.27279	0.203093	0.8252	PD/Ctrl	MG
s__[Clostridium] symbiosum [ref_mOTU_v3_04652]	spec	0.75177	-0.590461	0.540315	-1.09281	0.274477	0.882878	PD/Ctrl	MG
s__[Eubacterium] eligens [ref_mOTU_v3_02375]	spec	5.11151	-0.248963	0.804303	-0.309538	0.756912	0.94187	PD/Ctrl	MG
s__[Eubacterium] eligens [ref_mOTU_v3_02376]	spec	45.7297	0.132006	0.590527	0.223539	0.823116	0.955182	PD/Ctrl	MG
s__[Eubacterium] hallii [ref_mOTU_v3_03632]	spec	45.7262	-0.331007	0.403149	-0.821053	0.411616	0.887855	PD/Ctrl	MG
s__[Eubacterium] rectale [ref_mOTU_v3_03657]	spec	328.011	-0.282746	0.508753	-0.555764	0.578372	0.887855	PD/Ctrl	MG
s__[Eubacterium] siraeum [ref_mOTU_v3_02370]	spec	60.4924	1.29502	0.570169	2.2713	0.0231289	0.330657	PD/Ctrl	MG
s__[Eubacterium] sulci [ref_mOTU_v3_06466]	spec	0.406015	-0.178168	0.439251	-0.405618	0.685023	0.926609	PD/Ctrl	MG
s__[Ruminococcus] gnavus [ref_mOTU_v3_01594]	spec	12.622	0.0586446	0.622923	0.0941441	0.924995	0.984513	PD/Ctrl	MG
s__[Ruminococcus] torques [ref_mOTU_v3_03659]	spec	18.9646	-0.626507	0.653282	-0.959015	0.337551	0.882878	PD/Ctrl	MG
s__[Ruminococcus] torques [ref_mOTU_v3_03660]	spec	45.636	-0.409313	0.520345	-0.786619	0.431505	0.887855	PD/Ctrl	MG
s__[Ruminococcus] torques [ref_mOTU_v3_03703]	spec	20.3631	-0.65438	0.502371	-1.30258	0.192717	0.807581	PD/Ctrl	MG
s__Acinetobacter sp. [ref_mOTU_v3_02372]	spec	11.4518	-2.02871	0.999371	-2.02998	0.0423581	0.441898	PD/Ctrl	MG
s__Acinetobacter species incertae sedis [meta_mOTU_v3_12662]	spec	16.9412	-2.33973	1.01955	-2.29486	0.0217413	0.324785	PD/Ctrl	MG
s__Actinobacteria sp. [ref_mOTU_v3_01911]	spec	2.00336	0.56981	0.327114	1.74193	0.0815204	0.669508	PD/Ctrl	MG
s__Actinomyces graevenitzii [ref_mOTU_v3_04054]	spec	0.908482	-0.178583	0.363861	-0.490801	0.623568	0.892055	PD/Ctrl	MG
s__Actinomyces naeslundii [ref_mOTU_v3_02018]	spec	0.481575	0.358884	0.468038	0.766783	0.44321	0.887855	PD/Ctrl	MG
s__Actinomyces oris [ref_mOTU_v3_02019]	spec	2.35576	1.00414	0.324958	3.09006	0.00200118	0.0965569	PD/Ctrl	MG
s__Actinomyces sp. [ref_mOTU_v3_01913]	spec	0.952875	0.122834	0.5653	0.21729	0.827983	0.955182	PD/Ctrl	MG
s__Actinomyces sp. ICM47 [ref_mOTU_v3_01914]	spec	1.35023	0.189813	0.380865	0.498374	0.618221	0.892055	PD/Ctrl	MG
s__Actinomyces sp. oral taxon 448 [ref_mOTU_v3_12049]	spec	0.585326	0.906763	0.42004	2.15875	0.0308692	0.383766	PD/Ctrl	MG
s__Actinomyces species incertae sedis [ext_mOTU_v3_17926]	spec	1.57927	0.290342	0.407034	0.713312	0.475653	0.887855	PD/Ctrl	MG
s__Actinomyces species incertae sedis [ext_mOTU_v3_19569]	spec	0.877102	-0.102607	0.608498	-0.168623	0.866093	0.96715	PD/Ctrl	MG
s__Adlercreutzia equolifaciens [ref_mOTU_v3_08094]	spec	7.3886	-0.599695	0.403703	-1.48549	0.137415	0.762143	PD/Ctrl	MG
s__Akkermansia muciniphila [ref_mOTU_v3_03591]	spec	129.808	0.890554	0.679078	1.31142	0.189717	0.807581	PD/Ctrl	MG
s__Alistipes finegoldii [ref_mOTU_v3_03682]	spec	13.2356	0.655495	0.655814	0.999514	0.317546	0.882878	PD/Ctrl	MG
s__Alistipes finegoldii/onderdonkii [ref_mOTU_v3_03069]	spec	122.22	1.1782	0.584523	2.01565	0.0438362	0.445284	PD/Ctrl	MG
s__Alistipes ihumii [ref_mOTU_v3_07379]	spec	9.81834	1.1445	0.54973	2.08193	0.0373484	0.415198	PD/Ctrl	MG
s__Alistipes indistinctus [ref_mOTU_v3_11860]	spec	2.3132	-0.020335	0.609113	-0.0333846	0.973368	0.993943	PD/Ctrl	MG
s__Alistipes obesi [ref_mOTU_v3_06695]	spec	24.0782	1.18632	0.528831	2.2433	0.0248777	0.338897	PD/Ctrl	MG
s__Alistipes putredinis [ref_mOTU_v3_03683]	spec	114.636	0.186126	0.526986	0.35319	0.723946	0.938827	PD/Ctrl	MG
s__Alistipes senegalensis [ref_mOTU_v3_01017]	spec	3.31327	1.24753	0.800266	1.5589	0.11902	0.762143	PD/Ctrl	MG
s__Alistipes shahii [ref_mOTU_v3_01014]	spec	35.6758	1.0367	0.508277	2.03964	0.0413864	0.441898	PD/Ctrl	MG
s__Anaeromassilibacillus species incertae sedis [meta_mOTU_v3_13295]	spec	2.18529	0.0849477	0.426986	0.198947	0.842304	0.956263	PD/Ctrl	MG
s__Anaerostipes hadrus [ref_mOTU_v3_00856]	spec	83.1283	-0.00129647	0.375619	-0.00345156	0.997246	0.997246	PD/Ctrl	MG
s__Anaerostipes hadrus [ref_mOTU_v3_00857]	spec	79.3805	-0.0306926	0.350799	-0.0874936	0.930279	0.984513	PD/Ctrl	MG
s__Anaerotruncus colihominis [ref_mOTU_v3_03438]	spec	1.49566	1.34525	0.564099	2.38478	0.0170893	0.295916	PD/Ctrl	MG
s__Anaerotruncus rubiinfantis [ref_mOTU_v3_09169]	spec	0.920755	0.266929	0.374632	0.712508	0.47615	0.887855	PD/Ctrl	MG
s__Atopobiaceae species incertae sedis [meta_mOTU_v3_13944]	spec	5.51986	0.564958	0.635915	0.888417	0.374316	0.887855	PD/Ctrl	MG
s__Bacteria species incertae sedis [ext_mOTU_v3_16372]	spec	3.11264	1.3836	0.858139	1.61233	#N/A	#N/A	PD/Ctrl	MG
s__bacterium LF-3 [ref_mOTU_v3_03628]	spec	34.8378	-0.804155	0.527329	-1.52496	0.127269	0.762143	PD/Ctrl	MG
s__Bacteroidales species incertae sedis [meta_mOTU_v3_12262]	spec	8.88477	0.313944	0.388933	0.807192	0.419556	0.887855	PD/Ctrl	MG
s__Bacteroidales species incertae sedis [meta_mOTU_v3_13286]	spec	6.08971	0.424993	0.547392	0.776396	0.437515	0.887855	PD/Ctrl	MG
s__Bacteroides caccae [ref_mOTU_v3_03473]	spec	24.2632	0.0564176	0.598753	0.0942252	0.92493	0.984513	PD/Ctrl	MG
s__Bacteroides caecimuris [ref_mOTU_v3_03476]	spec	11.7787	-0.542985	0.685602	-0.791983	0.42837	0.887855	PD/Ctrl	MG
s__Bacteroides dorei/vulgatus [ref_mOTU_v3_02367]	spec	183.27	-0.449109	0.318479	-1.41017	0.158489	0.804957	PD/Ctrl	MG
s__Bacteroides fragilis [ref_mOTU_v3_01597]	spec	9.42416	2.48377	0.75239	3.30118	0.000962797	0.074328	PD/Ctrl	MG
s__Bacteroides massiliensis [ref_mOTU_v3_02135]	spec	32.0272	0.499735	1.10629	0.451723	0.651468	0.907822	PD/Ctrl	MG
s__Bacteroides sp. [ref_mOTU_v3_02810]	spec	20.488	-0.26924	0.843072	-0.319356	0.749456	0.94187	PD/Ctrl	MG
s__Bacteroides sp. [ref_mOTU_v3_03475]	spec	58.2741	0.71851	0.433733	1.65657	0.0976058	0.721581	PD/Ctrl	MG
s__Bacteroides species incertae sedis [ext_mOTU_v3_17504]	spec	2.82275	0.642847	0.743458	0.864671	0.38722	0.887855	PD/Ctrl	MG
s__Bacteroides stercoris [ref_mOTU_v3_01579]	spec	64.4542	0.379316	0.979465	0.387269	0.698557	0.926609	PD/Ctrl	MG
s__Bacteroides thetaiotaomicron [ref_mOTU_v3_01657]	spec	29.7556	-0.500547	0.427139	-1.17186	0.241253	0.850019	PD/Ctrl	MG
s__Bacteroides uniformis [ref_mOTU_v3_00855]	spec	238.685	1.22243	0.439584	2.78087	0.00542135	0.194513	PD/Ctrl	MG
s__Barnesiella intestinihominis [ref_mOTU_v3_03595]	spec	34.1382	0.107652	0.439042	0.245197	0.806304	0.955182	PD/Ctrl	MG
s__Bifidobacterium adolescentis [ref_mOTU_v3_02703]	spec	159.993	-0.415515	0.70129	-0.592501	0.553515	0.887855	PD/Ctrl	MG
s__Bifidobacterium catenulatum/kashiwanohense [ref_mOTU_v3_02701]	spec	9.6166	-0.799604	0.943809	-0.84721	#N/A	#N/A	PD/Ctrl	MG
s__Bifidobacterium dentium [ref_mOTU_v3_02698]	spec	3.71521	1.77113	0.740244	2.39264	0.0167279	0.295916	PD/Ctrl	MG
s__Bifidobacterium longum [ref_mOTU_v3_01099]	spec	79.3393	0.302695	0.496544	0.609603	0.542125	0.887855	PD/Ctrl	MG
s__Bifidobacterium ruminantium [ref_mOTU_v3_02702]	spec	71.0689	0.574344	1.13808	0.504659	0.613798	0.892055	PD/Ctrl	MG
s__Bilophila wadsworthia [ref_mOTU_v3_04300]	spec	13.365	0.391823	0.410927	0.95351	0.340332	0.882878	PD/Ctrl	MG
s__Bittarella massiliensis [ref_mOTU_v3_04646]	spec	1.57918	-0.401713	0.284243	-1.41328	0.157574	0.804957	PD/Ctrl	MG
s__Blautia massiliensis [ref_mOTU_v3_03342]	spec	81.6884	0.0972554	0.358667	0.271158	0.786269	0.954329	PD/Ctrl	MG
s__Blautia obeum [ref_mOTU_v3_05139]	spec	50.016	-0.00545241	0.373939	-0.014581	0.988366	0.997246	PD/Ctrl	MG
s__Blautia obeum [ref_mOTU_v3_05140]	spec	12.6095	0.0678594	0.403928	0.167999	0.866584	0.96715	PD/Ctrl	MG
s__Blautia obeum/wexlerae [ref_mOTU_v3_02154]	spec	220.732	-0.319662	0.254977	-1.25369	0.209955	0.844196	PD/Ctrl	MG
s__Butyricicoccus sp. [ref_mOTU_v3_02967]	spec	1.10717	0.185655	0.337742	0.549694	0.582529	0.887855	PD/Ctrl	MG
s__Butyricicoccus species incertae sedis [meta_mOTU_v3_12336]	spec	27.6755	0.0517152	0.299891	0.172447	0.863086	0.96715	PD/Ctrl	MG
s__Butyricicoccus species incertae sedis [meta_mOTU_v3_12617]	spec	9.86857	-0.0843137	0.768698	-0.109684	0.91266	0.984513	PD/Ctrl	MG
s__Clostridia species incertae sedis [ext_mOTU_v3_26753]	spec	0.760384	1.21903	0.494154	2.46689	0.0136291	0.276885	PD/Ctrl	MG
s__Clostridiaceae species incertae sedis [meta_mOTU_v3_12983]	spec	6.77728	0.300429	0.764211	0.393123	0.694229	0.926609	PD/Ctrl	MG
s__Clostridiales Family XIII. Incertae Sedis species incertae sedis [ext_mOTU_v3_16322]	spec	0.813463	0.675242	0.556908	1.21248	0.225327	0.849736	PD/Ctrl	MG
s__Clostridiales Family XIII. Incertae Sedis species incertae sedis [ext_mOTU_v3_16402]	spec	2.2519	0.264902	0.468274	0.565698	0.571599	0.887855	PD/Ctrl	MG
s__Clostridiales Family XIII. Incertae Sedis species incertae sedis [ext_mOTU_v3_17436]	spec	1.26005	0.921255	0.570825	1.6139	0.106549	0.74778	PD/Ctrl	MG
s__Clostridiales Family XIII. Incertae Sedis species incertae sedis [ext_mOTU_v3_17501]	spec	2.95667	-0.389575	0.628924	-0.619431	0.535633	0.887855	PD/Ctrl	MG
s__Clostridiales Family XIII. Incertae Sedis species incertae sedis [ext_mOTU_v3_26457]	spec	2.52383	0.85092	0.636454	1.33697	0.181233	0.807581	PD/Ctrl	MG
s__Clostridiales Family XIII. Incertae Sedis species incertae sedis [ext_mOTU_v3_28958]	spec	1.87041	-0.213278	0.496833	-0.429274	0.667724	0.924706	PD/Ctrl	MG
s__Clostridiales sp. [ref_mOTU_v3_02968]	spec	3.66526	-0.184444	0.325411	-0.566802	0.570849	0.887855	PD/Ctrl	MG
s__Clostridiales sp. [ref_mOTU_v3_03634]	spec	58.9061	-1.52673	1.12321	-1.35926	0.174064	0.807581	PD/Ctrl	MG
s__Clostridiales sp. [ref_mOTU_v3_03658]	spec	24.9784	-0.658045	0.546957	-1.2031	0.228937	0.849736	PD/Ctrl	MG
s__Clostridiales sp. [ref_mOTU_v3_05137]	spec	5.18926	-0.206964	0.339912	-0.608874	0.542608	0.887855	PD/Ctrl	MG
s__Clostridiales sp. [ref_mOTU_v3_05138]	spec	0.578454	0.525067	0.474052	1.10761	0.268028	0.882878	PD/Ctrl	MG
s__Clostridiales species incertae sedis [ext_mOTU_v3_16178]	spec	1.0395	0.163645	0.611975	0.267405	0.789157	0.954329	PD/Ctrl	MG
s__Clostridiales species incertae sedis [ext_mOTU_v3_16181]	spec	4.90423	0.604631	0.608334	0.993912	0.320266	0.882878	PD/Ctrl	MG
s__Clostridiales species incertae sedis [ext_mOTU_v3_16216]	spec	5.16602	2.07519	0.75593	2.74522	0.00604704	0.194513	PD/Ctrl	MG
s__Clostridiales species incertae sedis [ext_mOTU_v3_16417]	spec	1.00236	0.437353	0.467978	0.934557	0.350016	0.882878	PD/Ctrl	MG
s__Clostridiales species incertae sedis [ext_mOTU_v3_16427]	spec	2.08421	0.920823	0.353666	2.60365	0.00922356	0.222518	PD/Ctrl	MG
s__Clostridiales species incertae sedis [ext_mOTU_v3_17441]	spec	1.22829	-0.405854	0.653815	-0.620747	0.534766	0.887855	PD/Ctrl	MG
s__Clostridiales species incertae sedis [ext_mOTU_v3_17443]	spec	2.44981	0.44185	0.744712	0.593316	0.552969	0.887855	PD/Ctrl	MG
s__Clostridiales species incertae sedis [ext_mOTU_v3_17600]	spec	4.3048	0.23567	0.856185	0.275255	#N/A	#N/A	PD/Ctrl	MG
s__Clostridiales species incertae sedis [ext_mOTU_v3_17865]	spec	2.05668	0.0524049	0.719285	0.072857	0.94192	0.984513	PD/Ctrl	MG
s__Clostridiales species incertae sedis [ext_mOTU_v3_17908]	spec	0.938759	1.04924	0.541122	1.93901	0.0525007	0.465889	PD/Ctrl	MG
s__Clostridiales species incertae sedis [ext_mOTU_v3_17948]	spec	1.08526	0.540863	0.447073	1.20979	0.226361	0.849736	PD/Ctrl	MG
s__Clostridiales species incertae sedis [ext_mOTU_v3_17987]	spec	7.48735	0.42386	0.523745	0.809286	0.418351	0.887855	PD/Ctrl	MG
s__Clostridiales species incertae sedis [ext_mOTU_v3_17995]	spec	1.53886	-0.199409	0.331416	-0.601688	0.547382	0.887855	PD/Ctrl	MG
s__Clostridiales species incertae sedis [ext_mOTU_v3_18011]	spec	0.908826	0.480176	0.571105	0.840783	0.400469	0.887855	PD/Ctrl	MG
s__Clostridiales species incertae sedis [ext_mOTU_v3_18262]	spec	0.553515	-0.105341	0.505755	-0.208284	0.835007	0.955182	PD/Ctrl	MG
s__Clostridiales species incertae sedis [ext_mOTU_v3_24979]	spec	1.51709	-0.413748	0.608321	-0.680147	0.496411	0.887855	PD/Ctrl	MG
s__Clostridiales species incertae sedis [ext_mOTU_v3_26501]	spec	4.54923	0.435311	0.533509	0.815939	0.414535	0.887855	PD/Ctrl	MG
s__Clostridiales species incertae sedis [ext_mOTU_v3_26505]	spec	1.80261	-0.26145	0.456616	-0.572582	0.566928	0.887855	PD/Ctrl	MG
s__Clostridiales species incertae sedis [ext_mOTU_v3_26520]	spec	3.44417	-0.944119	0.70332	-1.34237	0.179475	0.807581	PD/Ctrl	MG
s__Clostridiales species incertae sedis [ext_mOTU_v3_26595]	spec	1.94805	-0.592191	0.688602	-0.859991	0.389794	0.887855	PD/Ctrl	MG
s__Clostridiales species incertae sedis [ext_mOTU_v3_26617]	spec	1.82276	0.309936	0.598698	0.517683	0.60468	0.890864	PD/Ctrl	MG
s__Clostridiales species incertae sedis [ext_mOTU_v3_26621]	spec	3.08105	0.662246	0.827117	0.800668	0.423324	0.887855	PD/Ctrl	MG
s__Clostridiales species incertae sedis [ext_mOTU_v3_26664]	spec	1.26694	0.0606719	0.646303	0.0938753	0.925208	0.984513	PD/Ctrl	MG
s__Clostridiales species incertae sedis [ext_mOTU_v3_26734]	spec	1.63608	-0.777607	0.741239	-1.04906	0.294149	0.882878	PD/Ctrl	MG
s__Clostridiales species incertae sedis [ext_mOTU_v3_26949]	spec	2.2556	-0.22638	0.705323	-0.320959	0.748241	0.94187	PD/Ctrl	MG
s__Clostridiales species incertae sedis [ext_mOTU_v3_28767]	spec	0.727681	-0.160664	0.447389	-0.359115	0.719509	0.938279	PD/Ctrl	MG
s__Clostridiales species incertae sedis [ext_mOTU_v3_33163]	spec	2.00442	1.22143	0.623195	1.95995	0.0500016	0.465889	PD/Ctrl	MG
s__Clostridiales species incertae sedis [meta_mOTU_v3_12252]	spec	49.3218	0.435246	0.557841	0.780233	0.435254	0.887855	PD/Ctrl	MG
s__Clostridiales species incertae sedis [meta_mOTU_v3_12253]	spec	65.8976	2.0153	0.727653	2.76959	0.00561263	0.194513	PD/Ctrl	MG
s__Clostridiales species incertae sedis [meta_mOTU_v3_12254]	spec	87.6728	0.614055	0.926833	0.662531	0.507631	0.887855	PD/Ctrl	MG
s__Clostridiales species incertae sedis [meta_mOTU_v3_12265]	spec	58.7409	-0.458129	0.69619	-0.658051	0.510505	0.887855	PD/Ctrl	MG
s__Clostridiales species incertae sedis [meta_mOTU_v3_12272]	spec	52.2244	1.04683	0.916066	1.14275	0.253144	0.857135	PD/Ctrl	MG
s__Clostridiales species incertae sedis [meta_mOTU_v3_12284]	spec	76.7064	-0.679788	0.472496	-1.43872	0.150231	0.794658	PD/Ctrl	MG
s__Clostridiales species incertae sedis [meta_mOTU_v3_12288]	spec	40.1604	1.30201	0.50945	2.55572	0.0105968	0.227243	PD/Ctrl	MG
s__Clostridiales species incertae sedis [meta_mOTU_v3_12301]	spec	28.2689	0.980904	0.427654	2.29368	0.0218086	0.324785	PD/Ctrl	MG
s__Clostridiales species incertae sedis [meta_mOTU_v3_12307]	spec	15.1885	3.02956	0.750058	4.03911	#N/A	#N/A	PD/Ctrl	MG
s__Clostridiales species incertae sedis [meta_mOTU_v3_12309]	spec	10.3856	-0.72769	0.856318	-0.849789	0.395442	0.887855	PD/Ctrl	MG
s__Clostridiales species incertae sedis [meta_mOTU_v3_12323]	spec	9.06736	-1.09467	0.972645	-1.12545	0.260396	0.874026	PD/Ctrl	MG
s__Clostridiales species incertae sedis [meta_mOTU_v3_12327]	spec	26.636	0.502893	0.877978	0.572785	0.56679	0.887855	PD/Ctrl	MG
s__Clostridiales species incertae sedis [meta_mOTU_v3_12334]	spec	36.881	0.771692	0.736998	1.04708	0.295065	0.882878	PD/Ctrl	MG
s__Clostridiales species incertae sedis [meta_mOTU_v3_12351]	spec	3.00485	0.225137	0.549893	0.40942	0.682232	0.926609	PD/Ctrl	MG
s__Clostridiales species incertae sedis [meta_mOTU_v3_12356]	spec	25.9447	0.857896	0.448961	1.91085	0.0560239	0.48056	PD/Ctrl	MG
s__Clostridiales species incertae sedis [meta_mOTU_v3_12361]	spec	26.1337	-0.367312	0.62765	-0.585218	0.558401	0.887855	PD/Ctrl	MG
s__Clostridiales species incertae sedis [meta_mOTU_v3_12371]	spec	16.0632	-0.555345	1.02541	-0.541586	#N/A	#N/A	PD/Ctrl	MG
s__Clostridiales species incertae sedis [meta_mOTU_v3_12411]	spec	25.276	-1.78771	0.753274	-2.37325	0.0176323	0.295916	PD/Ctrl	MG
s__Clostridiales species incertae sedis [meta_mOTU_v3_12437]	spec	47.0131	0.117198	0.848966	0.138048	0.890202	0.976086	PD/Ctrl	MG
s__Clostridiales species incertae sedis [meta_mOTU_v3_12445]	spec	2.68333	0.522733	0.342332	1.52698	0.126767	0.762143	PD/Ctrl	MG
s__Clostridiales species incertae sedis [meta_mOTU_v3_12447]	spec	5.09405	-0.739175	0.789285	-0.936512	0.34901	0.882878	PD/Ctrl	MG
s__Clostridiales species incertae sedis [meta_mOTU_v3_12452]	spec	77.0604	0.336583	0.785714	0.428379	0.668375	0.924706	PD/Ctrl	MG
s__Clostridiales species incertae sedis [meta_mOTU_v3_12463]	spec	61.2341	0.180346	0.681033	0.264813	0.791154	0.954329	PD/Ctrl	MG
s__Clostridiales species incertae sedis [meta_mOTU_v3_12473]	spec	4.80439	0.471962	0.880351	0.536107	0.591885	0.888708	PD/Ctrl	MG
s__Clostridiales species incertae sedis [meta_mOTU_v3_12476]	spec	18.6998	-0.154083	0.3798	-0.405696	0.684966	0.926609	PD/Ctrl	MG
s__Clostridiales species incertae sedis [meta_mOTU_v3_12494]	spec	13.9394	-0.514924	0.860407	-0.598466	0.549529	0.887855	PD/Ctrl	MG
s__Clostridiales species incertae sedis [meta_mOTU_v3_12521]	spec	32.6269	1.39168	0.836424	1.66385	0.0961431	0.721581	PD/Ctrl	MG
s__Clostridiales species incertae sedis [meta_mOTU_v3_12522]	spec	4.7836	-0.0574459	0.566252	-0.101449	0.919194	0.984513	PD/Ctrl	MG
s__Clostridiales species incertae sedis [meta_mOTU_v3_12554]	spec	3.86421	-0.0264195	0.403133	-0.0655354	0.947748	0.984513	PD/Ctrl	MG
s__Clostridiales species incertae sedis [meta_mOTU_v3_12556]	spec	12.0088	-0.605421	0.605843	-0.999304	0.317648	0.882878	PD/Ctrl	MG
s__Clostridiales species incertae sedis [meta_mOTU_v3_12563]	spec	74.9305	-0.0982401	0.349616	-0.280994	0.778715	0.954234	PD/Ctrl	MG
s__Clostridiales species incertae sedis [meta_mOTU_v3_12623]	spec	7.29679	0.806122	0.841318	0.958166	0.337979	0.882878	PD/Ctrl	MG
s__Clostridiales species incertae sedis [meta_mOTU_v3_12631]	spec	4.70418	0.49973	0.50925	0.981307	0.326441	0.882878	PD/Ctrl	MG
s__Clostridiales species incertae sedis [meta_mOTU_v3_12635]	spec	34.5092	0.264919	0.458838	0.577369	0.56369	0.887855	PD/Ctrl	MG
s__Clostridiales species incertae sedis [meta_mOTU_v3_12668]	spec	13.7528	1.99095	0.637073	3.12514	0.00177718	0.0965569	PD/Ctrl	MG
s__Clostridiales species incertae sedis [meta_mOTU_v3_12707]	spec	34.4726	-0.411564	0.527288	-0.780529	0.435079	0.887855	PD/Ctrl	MG
s__Clostridiales species incertae sedis [meta_mOTU_v3_12755]	spec	12.0303	0.0675	0.892425	0.0756366	0.939708	0.984513	PD/Ctrl	MG
s__Clostridiales species incertae sedis [meta_mOTU_v3_12776]	spec	7.37823	-0.833419	0.553981	-1.50442	0.132473	0.762143	PD/Ctrl	MG
s__Clostridiales species incertae sedis [meta_mOTU_v3_12786]	spec	8.37617	0.197885	0.360625	0.548727	0.583193	0.887855	PD/Ctrl	MG
s__Clostridiales species incertae sedis [meta_mOTU_v3_12851]	spec	0.841759	0.291291	0.52932	0.550313	0.582105	0.887855	PD/Ctrl	MG
s__Clostridiales species incertae sedis [meta_mOTU_v3_12873]	spec	30.4888	-0.491843	1.02372	-0.480447	0.63091	0.892055	PD/Ctrl	MG
s__Clostridiales species incertae sedis [meta_mOTU_v3_12952]	spec	3.41904	0.881424	0.410589	2.14673	0.0318148	0.383766	PD/Ctrl	MG
s__Clostridiales species incertae sedis [meta_mOTU_v3_13006]	spec	3.15975	0.345337	0.540091	0.639406	0.522559	0.887855	PD/Ctrl	MG
s__Clostridiales species incertae sedis [meta_mOTU_v3_13012]	spec	8.50617	-1.50074	0.877813	-1.70964	#N/A	#N/A	PD/Ctrl	MG
s__Clostridiales species incertae sedis [meta_mOTU_v3_13031]	spec	1.34508	-0.424725	0.638221	-0.665482	0.505742	0.887855	PD/Ctrl	MG
s__Clostridiales species incertae sedis [meta_mOTU_v3_13115]	spec	3.46039	-0.378099	0.724007	-0.522231	0.601509	0.889588	PD/Ctrl	MG
s__Clostridiales species incertae sedis [meta_mOTU_v3_13140]	spec	1.00172	0.146724	0.51668	0.283974	0.77643	0.954234	PD/Ctrl	MG
s__Clostridiales species incertae sedis [meta_mOTU_v3_13147]	spec	9.928	-0.511088	0.726286	-0.703701	0.481619	0.887855	PD/Ctrl	MG
s__Clostridiales species incertae sedis [meta_mOTU_v3_13155]	spec	3.36766	0.187127	0.838898	0.223063	0.823486	0.955182	PD/Ctrl	MG
s__Clostridiales species incertae sedis [meta_mOTU_v3_13165]	spec	2.18869	0.334334	0.581593	0.574859	0.565387	0.887855	PD/Ctrl	MG
s__Clostridiales species incertae sedis [meta_mOTU_v3_13168]	spec	13.3671	-0.384439	0.587315	-0.654571	0.512744	0.887855	PD/Ctrl	MG
s__Clostridiales species incertae sedis [meta_mOTU_v3_13187]	spec	11.4679	0.672385	0.67053	1.00277	#N/A	#N/A	PD/Ctrl	MG
s__Clostridiales species incertae sedis [meta_mOTU_v3_13200]	spec	8.88812	-0.132184	0.537795	-0.245789	0.805845	0.955182	PD/Ctrl	MG
s__Clostridiales species incertae sedis [meta_mOTU_v3_13202]	spec	7.24137	-0.288174	0.953221	-0.302316	0.762412	0.94324	PD/Ctrl	MG
s__Clostridiales species incertae sedis [meta_mOTU_v3_13280]	spec	17.6034	-0.251937	0.945349	-0.266502	0.789853	0.954329	PD/Ctrl	MG
s__Clostridiales species incertae sedis [meta_mOTU_v3_13304]	spec	5.35469	1.09678	0.836106	1.31176	0.189599	0.807581	PD/Ctrl	MG
s__Clostridiales species incertae sedis [meta_mOTU_v3_13377]	spec	3.98938	-0.279671	0.378938	-0.738039	0.460491	0.887855	PD/Ctrl	MG
s__Clostridiales species incertae sedis [meta_mOTU_v3_13390]	spec	15.9783	0.401171	0.788731	0.508628	0.611013	0.892055	PD/Ctrl	MG
s__Clostridiales species incertae sedis [meta_mOTU_v3_13415]	spec	7.60029	0.578924	0.698249	0.829108	0.407043	0.887855	PD/Ctrl	MG
s__Clostridiales species incertae sedis [meta_mOTU_v3_13572]	spec	7.44836	0.501247	0.618099	0.810949	0.417395	0.887855	PD/Ctrl	MG
s__Clostridiales species incertae sedis [meta_mOTU_v3_13662]	spec	7.62712	0.644238	0.681195	0.945746	0.344278	0.882878	PD/Ctrl	MG
s__Clostridiales species incertae sedis [meta_mOTU_v3_13701]	spec	8.8354	-0.418251	0.638254	-0.655306	0.512271	0.887855	PD/Ctrl	MG
s__Clostridiales species incertae sedis [meta_mOTU_v3_13729]	spec	3.29238	1.03448	0.79802	1.29631	0.19487	0.807581	PD/Ctrl	MG
s__Clostridiales species incertae sedis [meta_mOTU_v3_13774]	spec	3.13895	0.486072	0.754711	0.644051	0.519542	0.887855	PD/Ctrl	MG
s__Clostridiales species incertae sedis [meta_mOTU_v3_13792]	spec	2.75575	1.28217	0.815152	1.57293	0.115736	0.762143	PD/Ctrl	MG
s__Clostridiales species incertae sedis [meta_mOTU_v3_13863]	spec	3.45461	0.0406343	0.467394	0.086938	0.930721	0.984513	PD/Ctrl	MG
s__Clostridiales species incertae sedis [meta_mOTU_v3_13922]	spec	4.00214	0.764753	0.814529	0.93889	0.347787	0.882878	PD/Ctrl	MG
s__Clostridiales species incertae sedis [meta_mOTU_v3_13923]	spec	1.68867	0.995531	0.645881	1.54135	0.123231	0.762143	PD/Ctrl	MG
s__Clostridiales species incertae sedis [meta_mOTU_v3_13955]	spec	6.06241	2.08309	0.856856	2.43109	0.0150536	0.290534	PD/Ctrl	MG
s__Clostridiales species incertae sedis [meta_mOTU_v3_14166]	spec	8.66457	-0.619969	0.354228	-1.7502	0.0800843	0.669508	PD/Ctrl	MG
s__Clostridiales species incertae sedis [meta_mOTU_v3_14425]	spec	2.10863	0.491869	0.48534	1.01345	0.310844	0.882878	PD/Ctrl	MG
s__Clostridium phoceensis [ref_mOTU_v3_08865]	spec	14.564	-0.0170471	0.283847	-0.0600575	0.95211	0.984513	PD/Ctrl	MG
s__Clostridium saudiense/disporicum [ref_mOTU_v3_04336]	spec	1.93559	1.87302	0.726882	2.57679	0.00997228	0.226429	PD/Ctrl	MG
s__Clostridium sp. [ref_mOTU_v3_03622]	spec	10.3121	-0.468678	0.360178	-1.30124	0.193176	0.807581	PD/Ctrl	MG
s__Clostridium sp. [ref_mOTU_v3_03680]	spec	25.5806	0.295845	0.34919	0.847232	0.396866	0.887855	PD/Ctrl	MG
s__Clostridium sp. CAG:127 [meta_mOTU_v3_12306]	spec	60.8414	0.408893	1.04031	0.393048	0.694284	0.926609	PD/Ctrl	MG
s__Clostridium sp. CAG:138 [meta_mOTU_v3_12233]	spec	75.781	0.102117	0.758173	0.134688	0.892859	0.976086	PD/Ctrl	MG
s__Clostridium sp. CAG:217 [meta_mOTU_v3_12270]	spec	88.389	1.27799	1.11657	1.14457	0.252389	0.857135	PD/Ctrl	MG
s__Clostridium sp. CAG:273 [meta_mOTU_v3_12673]	spec	10.8453	0.864865	0.816492	1.05925	0.289488	0.882878	PD/Ctrl	MG
s__Clostridium sp. CAG:58 [ref_mOTU_v3_07640]	spec	4.41033	-0.761636	0.551417	-1.38123	0.167207	0.807581	PD/Ctrl	MG
s__Clostridium sp. CAG:7 [ref_mOTU_v3_07647]	spec	15.7353	-1.17212	0.443048	-2.64559	0.00815495	0.222518	PD/Ctrl	MG
s__Clostridium sp. Marseille-P3244 [ref_mOTU_v3_10248]	spec	0.538573	0.318686	0.437794	0.727937	0.466652	0.887855	PD/Ctrl	MG
s__Clostridium species incertae sedis [ext_mOTU_v3_17323]	spec	2.21759	0.236206	0.381628	0.618944	0.535953	0.887855	PD/Ctrl	MG
s__Clostridium species incertae sedis [ext_mOTU_v3_17404]	spec	2.72656	-0.553298	0.446222	-1.23996	0.214989	0.849736	PD/Ctrl	MG
s__Clostridium species incertae sedis [ext_mOTU_v3_17427]	spec	7.51918	-0.19869	0.357155	-0.556314	0.577996	0.887855	PD/Ctrl	MG
s__Clostridium species incertae sedis [ext_mOTU_v3_17477]	spec	2.87647	-0.83069	0.688887	-1.20584	0.227878	0.849736	PD/Ctrl	MG
s__Clostridium species incertae sedis [ext_mOTU_v3_17741]	spec	1.7518	0.432744	0.589743	0.733784	0.46308	0.887855	PD/Ctrl	MG
s__Clostridium species incertae sedis [ext_mOTU_v3_26503]	spec	1.87672	-0.883283	0.456701	-1.93405	0.0531066	0.465889	PD/Ctrl	MG
s__Clostridium species incertae sedis [meta_mOTU_v3_12324]	spec	3.07328	-0.246677	0.728932	-0.338409	0.735055	0.94187	PD/Ctrl	MG
s__Clostridium species incertae sedis [meta_mOTU_v3_12399]	spec	14.3394	-0.453672	0.936082	-0.484649	0.627925	0.892055	PD/Ctrl	MG
s__Clostridium species incertae sedis [meta_mOTU_v3_12417]	spec	30.2268	0.489263	0.548357	0.892234	0.372267	0.887855	PD/Ctrl	MG
s__Clostridium species incertae sedis [meta_mOTU_v3_12640]	spec	18.2005	-0.158935	0.637333	-0.249375	0.80307	0.955182	PD/Ctrl	MG
s__Collinsella aerofaciens [ref_mOTU_v3_03626]	spec	58.3819	-0.2913	0.418967	-0.695282	0.486879	0.887855	PD/Ctrl	MG
s__Collinsella bouchesdurhonensis [ref_mOTU_v3_03627]	spec	6.8887	0.21795	0.69654	0.312903	0.754354	0.94187	PD/Ctrl	MG
s__Collinsella species incertae sedis [ext_mOTU_v3_17329]	spec	3.71623	0.314887	0.820399	0.383822	0.70111	0.92681	PD/Ctrl	MG
s__Collinsella species incertae sedis [ext_mOTU_v3_17334]	spec	4.60758	0.330324	0.494838	0.66754	0.504427	0.887855	PD/Ctrl	MG
s__Collinsella species incertae sedis [ext_mOTU_v3_17335]	spec	3.3149	-0.270591	0.555149	-0.487421	0.62596	0.892055	PD/Ctrl	MG
s__Collinsella species incertae sedis [ext_mOTU_v3_17337]	spec	50.351	0.0933555	0.459134	0.203329	0.838878	0.955182	PD/Ctrl	MG
s__Collinsella species incertae sedis [ext_mOTU_v3_17345]	spec	21.3038	0.814003	0.768692	1.05894	0.289625	0.882878	PD/Ctrl	MG
s__Collinsella species incertae sedis [ext_mOTU_v3_17348]	spec	47.7304	0.369397	0.44097	0.837693	0.402203	0.887855	PD/Ctrl	MG
s__Collinsella species incertae sedis [ext_mOTU_v3_17351]	spec	2.84602	-0.561691	0.780699	-0.719472	0.47185	0.887855	PD/Ctrl	MG
s__Collinsella species incertae sedis [ext_mOTU_v3_17637]	spec	2.01724	-0.35255	0.69592	-0.506596	0.612439	0.892055	PD/Ctrl	MG
s__Collinsella species incertae sedis [ext_mOTU_v3_26711]	spec	7.50273	-0.783443	0.92347	-0.848368	0.396233	0.887855	PD/Ctrl	MG
s__Collinsella species incertae sedis [ext_mOTU_v3_28721]	spec	1.60362	0.211202	0.678353	0.311345	0.755538	0.94187	PD/Ctrl	MG
s__Collinsella species incertae sedis [meta_mOTU_v3_12451]	spec	6.29808	0.229064	0.672708	0.340511	0.733472	0.94187	PD/Ctrl	MG
s__Coprobacillus cateniformis [ref_mOTU_v3_03929]	spec	2.03844	0.990317	0.807563	1.2263	0.220084	0.849736	PD/Ctrl	MG
s__Coprobacter fastidiosus [ref_mOTU_v3_03667]	spec	2.88021	0.720673	0.607555	1.18619	0.235549	0.849736	PD/Ctrl	MG
s__Coprococcus catus [ref_mOTU_v3_11851]	spec	24.6449	0.0698449	0.450443	0.155058	0.876775	0.969729	PD/Ctrl	MG
s__Coprococcus comes [ref_mOTU_v3_03690]	spec	50.5788	-0.0310599	0.450708	-0.0689136	0.945058	0.984513	PD/Ctrl	MG
s__Coprococcus eutactus [ref_mOTU_v3_02378]	spec	40.3018	0.881372	1.15921	0.76032	0.447063	0.887855	PD/Ctrl	MG
s__Coriobacteriia species incertae sedis [ext_mOTU_v3_26765]	spec	4.05553	-0.447612	0.70216	-0.637478	0.523813	0.887855	PD/Ctrl	MG
s__Desulfovibrio species incertae sedis [ext_mOTU_v3_16415]	spec	2.01102	0.392067	0.616218	0.636247	0.524615	0.887855	PD/Ctrl	MG
s__Dialister invisus [ref_mOTU_v3_03691]	spec	64.4369	-1.06289	1.13969	-0.932615	0.351019	0.882878	PD/Ctrl	MG
s__Dorea formicigenerans [ref_mOTU_v3_03668]	spec	27.2469	-0.116471	0.296669	-0.392597	0.694617	0.926609	PD/Ctrl	MG
s__Dorea longicatena [ref_mOTU_v3_03692]	spec	68.0343	-0.2348	0.467163	-0.502608	0.61524	0.892055	PD/Ctrl	MG
s__Dorea longicatena [ref_mOTU_v3_03693]	spec	20.6153	-0.793698	0.531642	-1.49292	0.135459	0.762143	PD/Ctrl	MG
s__Eggerthella lenta [ref_mOTU_v3_00719]	spec	12.2715	0.527857	0.556657	0.948263	0.342996	0.882878	PD/Ctrl	MG
s__Eggerthella species incertae sedis [meta_mOTU_v3_12316]	spec	34.0405	-0.0315088	0.765267	-0.0411735	0.967158	0.99288	PD/Ctrl	MG
s__Eggerthellaceae species incertae sedis [ext_mOTU_v3_15443]	spec	9.53823	-0.278305	0.403612	-0.689536	0.490486	0.887855	PD/Ctrl	MG
s__Eggerthellaceae species incertae sedis [ext_mOTU_v3_16295]	spec	3.12435	0.253887	0.325672	0.77958	0.435638	0.887855	PD/Ctrl	MG
s__Eggerthellaceae species incertae sedis [ext_mOTU_v3_17307]	spec	4.32129	-1.84958	0.637589	-2.9009	0.00372087	0.159584	PD/Ctrl	MG
s__Eggerthellaceae species incertae sedis [ext_mOTU_v3_17308]	spec	2.75574	0.225744	0.612634	0.368481	0.712515	0.934173	PD/Ctrl	MG
s__Eggerthellaceae species incertae sedis [ext_mOTU_v3_17907]	spec	8.60526	0.919629	0.786649	1.16905	0.242385	0.850019	PD/Ctrl	MG
s__Eggerthellaceae species incertae sedis [meta_mOTU_v3_12569]	spec	20.0687	-0.512069	0.631882	-0.810387	0.417718	0.887855	PD/Ctrl	MG
s__Eggerthellaceae species incertae sedis [meta_mOTU_v3_13204]	spec	29.2608	0.128208	0.54393	0.235707	0.81366	0.955182	PD/Ctrl	MG
s__Eisenbergiella tayi [ref_mOTU_v3_03446]	spec	2.00007	0.778068	0.576763	1.34903	0.177329	0.807581	PD/Ctrl	MG
s__Erysipelatoclostridium ramosum [ref_mOTU_v3_03439]	spec	2.60909	-0.881372	0.806275	-1.09314	#N/A	#N/A	PD/Ctrl	MG
s__Erysipelotrichaceae species incertae sedis [ext_mOTU_v3_16223]	spec	1.67143	-0.756681	0.483994	-1.56341	0.117956	0.762143	PD/Ctrl	MG
s__Escherichia coli [ref_mOTU_v3_00095]	spec	85.3041	2.88288	0.678881	4.24652	2.17117e-05	0.00419037	PD/Ctrl	MG
s__Eubacteriaceae bacterium CHKCI005 [ref_mOTU_v3_09413]	spec	0.897111	0.471582	0.474431	0.993995	0.320225	0.882878	PD/Ctrl	MG
s__Eubacterium ramulus [ref_mOTU_v3_03570]	spec	16.5036	-0.967408	0.485597	-1.9922	0.0463487	0.447265	PD/Ctrl	MG
s__Eubacterium sp. [ref_mOTU_v3_03633]	spec	5.81954	1.11828	0.689653	1.6215	0.104909	0.74778	PD/Ctrl	MG
s__Eubacterium sp. CAG:156 [ref_mOTU_v3_07673]	spec	3.2844	-0.641014	0.819303	-0.78239	0.433985	0.887855	PD/Ctrl	MG
s__Eubacterium sp. CAG:180 [ref_mOTU_v3_07675]	spec	87.6512	0.810321	1.05333	0.769293	0.441719	0.887855	PD/Ctrl	MG
s__Eubacterium sp. CAG:202 [meta_mOTU_v3_12308]	spec	179.358	1.23107	1.30931	0.940245	0.347092	0.882878	PD/Ctrl	MG
s__Eubacterium sp. CAG:38 [ref_mOTU_v3_07679]	spec	15.2068	-0.566243	0.530473	-1.06743	0.285777	0.882878	PD/Ctrl	MG
s__Eubacterium species incertae sedis [ext_mOTU_v3_16236]	spec	41.5697	0.309783	0.490998	0.630926	0.528089	0.887855	PD/Ctrl	MG
s__Eubacterium species incertae sedis [meta_mOTU_v3_12260]	spec	8.05901	0.35151	0.760509	0.462204	0.643935	0.900576	PD/Ctrl	MG
s__Eubacterium species incertae sedis [meta_mOTU_v3_12314]	spec	15.0987	0.215631	0.526772	0.409344	0.682287	0.926609	PD/Ctrl	MG
s__Eubacterium species incertae sedis [meta_mOTU_v3_13196]	spec	7.26355	0.775556	0.653056	1.18758	0.234999	0.849736	PD/Ctrl	MG
s__Eubacterium ventriosum [ref_mOTU_v3_11151]	spec	11.756	0.0336765	0.582619	0.057802	0.953906	0.984513	PD/Ctrl	MG
s__Faecalibacterium prausnitzii [ref_mOTU_v3_06108]	spec	165.949	-0.088558	0.410071	-0.215958	0.829021	0.955182	PD/Ctrl	MG
s__Faecalibacterium prausnitzii [ref_mOTU_v3_06109]	spec	149.451	0.0721612	0.547633	0.131769	0.895167	0.976086	PD/Ctrl	MG
s__Faecalibacterium prausnitzii [ref_mOTU_v3_06110]	spec	145.814	-1.02495	0.493078	-2.07867	0.0376475	0.415198	PD/Ctrl	MG
s__Faecalibacterium prausnitzii [ref_mOTU_v3_06112]	spec	211.81	-0.0306207	0.44163	-0.0693355	0.944723	0.984513	PD/Ctrl	MG
s__Faecalibacterium sp. [ref_mOTU_v3_03636]	spec	112.923	-0.0733964	0.954262	-0.0769143	0.938692	0.984513	PD/Ctrl	MG
s__Faecalibacterium species incertae sedis [ext_mOTU_v3_18130]	spec	7.45917	0.121658	0.72663	0.167427	0.867034	0.96715	PD/Ctrl	MG
s__Faecalibacterium species incertae sedis [ext_mOTU_v3_26216]	spec	7.32897	0.346105	0.726431	0.476445	0.633757	0.892812	PD/Ctrl	MG
s__Faecalibacterium species incertae sedis [meta_mOTU_v3_12325]	spec	100.153	0.193314	0.508364	0.380266	0.703748	0.927122	PD/Ctrl	MG
s__Faecalibacterium species incertae sedis [meta_mOTU_v3_12331]	spec	40.9873	-1.68342	0.641393	-2.62463	0.00867438	0.222518	PD/Ctrl	MG
s__Faecalibacterium species incertae sedis [meta_mOTU_v3_12403]	spec	41.6204	0.191524	0.623911	0.306972	0.758864	0.94187	PD/Ctrl	MG
s__Faecalicatena contorta [ref_mOTU_v3_03445]	spec	1.59987	2.17421	0.459342	4.73332	2.20881e-06	0.0008526	PD/Ctrl	MG
s__Firmicutes bacterium ADurb.Bin467 [meta_mOTU_v3_12694]	spec	2.64719	-0.642446	0.614939	-1.04473	0.296147	0.882878	PD/Ctrl	MG
s__Firmicutes bacterium CAG:102 [ref_mOTU_v3_07726]	spec	9.69333	-0.477585	0.671179	-0.711561	0.476736	0.887855	PD/Ctrl	MG
s__Firmicutes sp. [ref_mOTU_v3_02374]	spec	29.106	0.130768	0.812405	0.160964	0.872122	0.967353	PD/Ctrl	MG
s__Firmicutes sp. [ref_mOTU_v3_02743]	spec	1.36858	0.271253	0.431283	0.628945	0.529385	0.887855	PD/Ctrl	MG
s__Firmicutes sp. [ref_mOTU_v3_03629]	spec	13.7419	-0.0723935	0.927846	-0.0780232	0.93781	0.984513	PD/Ctrl	MG
s__Firmicutes sp. [ref_mOTU_v3_03641]	spec	25.6027	-0.948653	1.01363	-0.935899	0.349325	0.882878	PD/Ctrl	MG
s__Firmicutes species incertae sedis [ext_mOTU_v3_26597]	spec	6.90057	0.845598	0.707912	1.1945	0.232284	0.849736	PD/Ctrl	MG
s__Firmicutes species incertae sedis [ext_mOTU_v3_26969]	spec	2.95748	0.659411	0.538697	1.22408	0.220921	0.849736	PD/Ctrl	MG
s__Firmicutes species incertae sedis [meta_mOTU_v3_12285]	spec	25.7403	-1.25226	0.969909	-1.29111	0.196665	0.807581	PD/Ctrl	MG
s__Firmicutes species incertae sedis [meta_mOTU_v3_12845]	spec	1.91322	0.585086	0.558629	1.04736	0.294934	0.882878	PD/Ctrl	MG
s__Firmicutes species incertae sedis [meta_mOTU_v3_13945]	spec	2.24192	0.350459	0.543991	0.644237	0.519422	0.887855	PD/Ctrl	MG
s__Flavonifractor plautii [ref_mOTU_v3_02971]	spec	7.47486	0.624161	0.407507	1.53166	0.125607	0.762143	PD/Ctrl	MG
s__Flavonifractor plautii [ref_mOTU_v3_05238]	spec	3.29225	0.322221	0.37429	0.860884	0.389302	0.887855	PD/Ctrl	MG
s__Flavonifractor species incertae sedis [ext_mOTU_v3_17315]	spec	4.48854	-0.213462	0.51277	-0.416291	0.677197	0.926609	PD/Ctrl	MG
s__Flavonifractor species incertae sedis [ext_mOTU_v3_17316]	spec	2.01301	-0.468529	0.485535	-0.964976	0.334557	0.882878	PD/Ctrl	MG
s__Fusicatenibacter saccharivorans [ref_mOTU_v3_02680]	spec	28.9417	-0.519195	0.835949	-0.621085	0.534544	0.887855	PD/Ctrl	MG
s__Gemella sanguinis [ref_mOTU_v3_04303]	spec	0.407459	0.504512	0.470757	1.0717	0.283853	0.882878	PD/Ctrl	MG
s__Haemophilus parainfluenzae [ref_mOTU_v3_01068]	spec	1.16395	-0.492506	0.652488	-0.754812	0.450362	0.887855	PD/Ctrl	MG
s__Holdemanella biformis [meta_mOTU_v3_12329]	spec	67.9896	0.401587	0.831298	0.483085	0.629035	0.892055	PD/Ctrl	MG
s__Holdemania filiformis [ref_mOTU_v3_05921]	spec	1.51647	0.301252	0.440134	0.684457	0.493687	0.887855	PD/Ctrl	MG
s__Holdemania sp. Marseille-P2844 [ref_mOTU_v3_05920]	spec	0.862586	-0.863069	0.625189	-1.38049	0.167434	0.807581	PD/Ctrl	MG
s__Intestinibacter bartlettii [ref_mOTU_v3_03687]	spec	6.27792	0.157787	0.505923	0.31188	0.755132	0.94187	PD/Ctrl	MG
s__Intestinimonas butyriciproducens [ref_mOTU_v3_03928]	spec	1.48756	0.305538	0.383124	0.797492	0.425166	0.887855	PD/Ctrl	MG
s__Intestinimonas massiliensis [ref_mOTU_v3_02970]	spec	2.22869	-0.208114	0.591133	-0.352059	0.724794	0.938827	PD/Ctrl	MG
s__Lachnospiraceae species incertae sedis [ext_mOTU_v3_16177]	spec	9.37957	0.0920353	0.559896	0.164379	0.869433	0.96715	PD/Ctrl	MG
s__Lachnospiraceae species incertae sedis [ext_mOTU_v3_16248]	spec	13.3052	0.181498	0.345877	0.524746	0.599759	0.889588	PD/Ctrl	MG
s__Lachnospiraceae species incertae sedis [ext_mOTU_v3_16262]	spec	0.806472	-1.07525	0.481241	-2.23433	0.0254612	0.338897	PD/Ctrl	MG
s__Lachnospiraceae species incertae sedis [ext_mOTU_v3_16268]	spec	0.892031	-0.793042	0.587887	-1.34897	0.177347	0.807581	PD/Ctrl	MG
s__Lachnospiraceae species incertae sedis [ext_mOTU_v3_17428]	spec	1.55252	-0.126666	0.575927	-0.219934	0.825923	0.955182	PD/Ctrl	MG
s__Lachnospiraceae species incertae sedis [ext_mOTU_v3_17986]	spec	7.3199	0.46148	0.592523	0.778839	0.436074	0.887855	PD/Ctrl	MG
s__Lachnospiraceae species incertae sedis [ext_mOTU_v3_26654]	spec	3.97224	-0.687478	0.722097	-0.952058	0.341068	0.882878	PD/Ctrl	MG
s__Lachnospiraceae species incertae sedis [meta_mOTU_v3_12240]	spec	157.788	-0.00591702	0.307086	-0.0192683	0.984627	0.997246	PD/Ctrl	MG
s__Lactobacillus sakei [ref_mOTU_v3_01607]	spec	1.1813	0.576075	0.614714	0.937143	0.348685	0.882878	PD/Ctrl	MG
s__Lactococcus lactis [ref_mOTU_v3_01300]	spec	2.26762	-0.786021	0.49132	-1.59982	0.10964	0.75573	PD/Ctrl	MG
s__Lactococcus lactis [ref_mOTU_v3_01301]	spec	1.93789	-1.01003	0.744025	-1.35752	0.174617	0.807581	PD/Ctrl	MG
s__Lentisphaerae species incertae sedis [meta_mOTU_v3_12568]	spec	2.43397	-0.321598	0.594139	-0.541285	0.588311	0.888708	PD/Ctrl	MG
s__Massilimaliae massiliensis [ref_mOTU_v3_10172]	spec	0.533812	0.415156	0.473027	0.877659	0.380129	0.887855	PD/Ctrl	MG
s__Massilioclostridium coli [ref_mOTU_v3_10237]	spec	1.26717	0.222125	0.306361	0.725043	0.468426	0.887855	PD/Ctrl	MG
s__Methanobrevibacter smithii [ref_mOTU_v3_03695]	spec	49.6111	1.26096	0.940904	1.34015	0.180195	0.807581	PD/Ctrl	MG
s__Mogibacterium species incertae sedis [meta_mOTU_v3_12290]	spec	0.992616	0.646931	0.379441	1.70496	0.0882022	0.709292	PD/Ctrl	MG
s__Odoribacter splanchnicus [ref_mOTU_v3_03697]	spec	11.4173	0.0699132	0.243492	0.287128	0.774015	0.954234	PD/Ctrl	MG
s__Oscillibacter sp. [ref_mOTU_v3_03341]	spec	19.7355	0.72168	0.334814	2.15547	0.0311252	0.383766	PD/Ctrl	MG
s__Oscillibacter sp. [ref_mOTU_v3_04664]	spec	85.369	0.357384	0.509974	0.700789	0.483435	0.887855	PD/Ctrl	MG
s__Oscillibacter sp. 57_20 [meta_mOTU_v3_12282]	spec	3.27911	-0.213524	0.456693	-0.467544	0.640111	0.898483	PD/Ctrl	MG
s__Oscillibacter sp. 57_20 [meta_mOTU_v3_12610]	spec	25.7695	0.114499	0.55658	0.205719	0.83701	0.955182	PD/Ctrl	MG
s__Oscillibacter sp. 57_20 [ref_mOTU_v3_10413]	spec	2.92265	0.789666	0.539687	1.46319	0.143415	0.77969	PD/Ctrl	MG
s__Oscillibacter species incertae sedis [ext_mOTU_v3_16208]	spec	3.63807	0.103786	0.499342	0.207845	0.83535	0.955182	PD/Ctrl	MG
s__Oscillibacter species incertae sedis [ext_mOTU_v3_16336]	spec	1.20661	0.146411	0.453793	0.322639	0.746969	0.94187	PD/Ctrl	MG
s__Oscillibacter species incertae sedis [ext_mOTU_v3_17444]	spec	2.0761	0.644036	0.496246	1.29782	0.19435	0.807581	PD/Ctrl	MG
s__Oscillibacter species incertae sedis [ext_mOTU_v3_17445]	spec	1.44001	-0.0498265	0.62307	-0.0799692	0.936262	0.984513	PD/Ctrl	MG
s__Oscillibacter species incertae sedis [ext_mOTU_v3_17772]	spec	1.9095	0.139106	0.65005	0.213993	0.830553	0.955182	PD/Ctrl	MG
s__Oscillibacter species incertae sedis [ext_mOTU_v3_17930]	spec	2.66856	0.255656	0.282122	0.906189	0.364836	0.887855	PD/Ctrl	MG
s__Oscillibacter species incertae sedis [ext_mOTU_v3_17998]	spec	3.42584	0.108869	0.804999	0.135241	0.892421	0.976086	PD/Ctrl	MG
s__Oscillibacter species incertae sedis [ext_mOTU_v3_18125]	spec	5.9956	-0.277963	0.502794	-0.552838	0.580375	0.887855	PD/Ctrl	MG
s__Oscillibacter species incertae sedis [ext_mOTU_v3_28927]	spec	1.59824	-0.278595	0.522655	-0.533038	0.594007	0.888708	PD/Ctrl	MG
s__Parabacteroides distasonis [ref_mOTU_v3_03640]	spec	34.4428	-0.0904707	0.367112	-0.246439	0.805342	0.955182	PD/Ctrl	MG
s__Parabacteroides merdae [ref_mOTU_v3_05401]	spec	32.9462	0.584548	0.502202	1.16397	0.244436	0.850019	PD/Ctrl	MG
s__Parabacteroides species incertae sedis [ext_mOTU_v3_26659]	spec	1.69453	-0.546226	0.643782	-0.848464	0.39618	0.887855	PD/Ctrl	MG
s__Parabacteroides species incertae sedis [ext_mOTU_v3_26689]	spec	2.53998	-0.68253	0.711029	-0.959919	0.337096	0.882878	PD/Ctrl	MG
s__Paraprevotella clara [ref_mOTU_v3_03698]	spec	13.1223	1.18586	1.01296	1.17069	0.241725	0.850019	PD/Ctrl	MG
s__Parasutterella excrementihominis [ref_mOTU_v3_03674]	spec	2.80863	0.645272	0.596384	1.08197	0.279264	0.882878	PD/Ctrl	MG
s__Peptostreptococcaceae species incertae sedis [meta_mOTU_v3_13426]	spec	2.95034	-0.0040109	0.836371	-0.0047956	0.996174	0.997246	PD/Ctrl	MG
s__Phocea massiliensis [ref_mOTU_v3_05236]	spec	0.927951	0.24099	0.401445	0.600306	0.548302	0.887855	PD/Ctrl	MG
s__Prevotella copri [ref_mOTU_v3_03701]	spec	287.988	-0.545943	0.913978	-0.597327	0.550289	0.887855	PD/Ctrl	MG
s__Prevotella species incertae sedis [meta_mOTU_v3_12332]	spec	178.891	-2.9869	1.3029	-2.2925	0.0218767	0.324785	PD/Ctrl	MG
s__Pseudoflavonifractor capillosus [ref_mOTU_v3_02969]	spec	0.93091	-0.167686	0.482233	-0.347729	0.728044	0.939883	PD/Ctrl	MG
s__Pseudoflavonifractor species incertae sedis [meta_mOTU_v3_14283]	spec	4.30738	-0.403662	0.435991	-0.925851	0.354523	0.882878	PD/Ctrl	MG
s__Rikenellaceae sp. [ref_mOTU_v3_03593]	spec	13.0583	-0.564904	0.848079	-0.666099	0.505348	0.887855	PD/Ctrl	MG
s__Romboutsia timonensis [ref_mOTU_v3_09389]	spec	5.10277	1.27434	0.48153	2.64644	0.0081343	0.222518	PD/Ctrl	MG
s__Roseburia hominis [ref_mOTU_v3_00861]	spec	24.2327	-0.706593	0.421959	-1.67456	0.0940215	0.721581	PD/Ctrl	MG
s__Roseburia intestinalis [ref_mOTU_v3_03702]	spec	44.78	-1.20332	0.616289	-1.95252	0.0508765	0.465889	PD/Ctrl	MG
s__Roseburia inulinivorans [ref_mOTU_v3_00860]	spec	53.9802	-0.454092	0.433525	-1.04744	0.294896	0.882878	PD/Ctrl	MG
s__Roseburia sp. [ref_mOTU_v3_03649]	spec	4.32761	-0.323104	0.828448	-0.390011	0.696528	0.926609	PD/Ctrl	MG
s__Roseburia sp. [ref_mOTU_v3_03650]	spec	34.0882	-0.336503	0.636551	-0.528634	0.597059	0.889588	PD/Ctrl	MG
s__Roseburia sp. 40_7 [meta_mOTU_v3_12352]	spec	37.1541	-0.00646417	0.510379	-0.0126654	0.989895	0.997246	PD/Ctrl	MG
s__Roseburia species incertae sedis [ext_mOTU_v3_17371]	spec	9.59518	-0.0277009	0.917641	-0.0301871	0.975918	0.993943	PD/Ctrl	MG
s__Roseburia species incertae sedis [ext_mOTU_v3_17394]	spec	2.61976	-0.336176	0.627667	-0.535597	0.592237	0.888708	PD/Ctrl	MG
s__Roseburia species incertae sedis [meta_mOTU_v3_12366]	spec	150.211	-0.0390403	0.549022	-0.0711088	0.943311	0.984513	PD/Ctrl	MG
s__Rothia mucilaginosa [ref_mOTU_v3_05265]	spec	0.629574	0.0942981	0.440581	0.214031	0.830523	0.955182	PD/Ctrl	MG
s__Ruminococcaceae bacterium D16 [ref_mOTU_v3_11463]	spec	1.53839	1.07484	0.651676	1.64934	0.0990772	0.721581	PD/Ctrl	MG
s__Ruminococcaceae species incertae sedis [ext_mOTU_v3_16202]	spec	1.82167	0.751881	0.705527	1.0657	0.286558	0.882878	PD/Ctrl	MG
s__Ruminococcaceae species incertae sedis [ext_mOTU_v3_16259]	spec	0.695385	0.289621	0.457163	0.633519	0.526395	0.887855	PD/Ctrl	MG
s__Ruminococcaceae species incertae sedis [ext_mOTU_v3_16263]	spec	5.33275	0.44495	0.374539	1.18799	0.234836	0.849736	PD/Ctrl	MG
s__Ruminococcaceae species incertae sedis [ext_mOTU_v3_16287]	spec	1.88654	0.106659	0.559002	0.190803	0.84868	0.959344	PD/Ctrl	MG
s__Ruminococcaceae species incertae sedis [ext_mOTU_v3_16294]	spec	0.644849	0.275028	0.459624	0.598376	0.549589	0.887855	PD/Ctrl	MG
s__Ruminococcaceae species incertae sedis [ext_mOTU_v3_16365]	spec	0.98302	0.397474	0.396281	1.00301	0.315855	0.882878	PD/Ctrl	MG
s__Ruminococcaceae species incertae sedis [ext_mOTU_v3_17317]	spec	0.77283	-0.708115	0.546363	-1.29605	0.194958	0.807581	PD/Ctrl	MG
s__Ruminococcaceae species incertae sedis [ext_mOTU_v3_17393]	spec	4.00812	0.442873	0.476963	0.928528	0.353134	0.882878	PD/Ctrl	MG
s__Ruminococcaceae species incertae sedis [ext_mOTU_v3_17414]	spec	1.91559	0.820512	0.548479	1.49598	0.134659	0.762143	PD/Ctrl	MG
s__Ruminococcaceae species incertae sedis [ext_mOTU_v3_17494]	spec	3.34978	0.18876	0.568476	0.332045	0.739855	0.94187	PD/Ctrl	MG
s__Ruminococcaceae species incertae sedis [ext_mOTU_v3_17811]	spec	2.24619	0.335335	0.552756	0.606661	0.544076	0.887855	PD/Ctrl	MG
s__Ruminococcaceae species incertae sedis [ext_mOTU_v3_17884]	spec	1.0587	0.0137952	0.405916	0.0339854	0.972889	0.993943	PD/Ctrl	MG
s__Ruminococcaceae species incertae sedis [ext_mOTU_v3_17886]	spec	4.2509	-0.176829	0.664403	-0.266147	0.790126	0.954329	PD/Ctrl	MG
s__Ruminococcaceae species incertae sedis [ext_mOTU_v3_17927]	spec	3.05389	0.439544	0.470165	0.934872	0.349854	0.882878	PD/Ctrl	MG
s__Ruminococcaceae species incertae sedis [ext_mOTU_v3_18070]	spec	1.46887	-0.0255036	0.516825	-0.0493467	0.960643	0.988822	PD/Ctrl	MG
s__Ruminococcaceae species incertae sedis [ext_mOTU_v3_33174]	spec	2.25551	0.686729	0.46323	1.48248	0.138212	0.762143	PD/Ctrl	MG
s__Ruminococcaceae species incertae sedis [meta_mOTU_v3_12239]	spec	242.491	0.367749	0.408301	0.900682	0.367757	0.887855	PD/Ctrl	MG
s__Ruminococcaceae species incertae sedis [meta_mOTU_v3_12259]	spec	132.383	-0.267658	0.464346	-0.576419	0.564332	0.887855	PD/Ctrl	MG
s__Ruminococcaceae species incertae sedis [meta_mOTU_v3_12264]	spec	32.0767	0.965754	0.955138	1.01111	0.311962	0.882878	PD/Ctrl	MG
s__Ruminococcaceae species incertae sedis [meta_mOTU_v3_12286]	spec	21.6374	0.10206	0.484414	0.210688	0.833131	0.955182	PD/Ctrl	MG
s__Ruminococcaceae species incertae sedis [meta_mOTU_v3_12396]	spec	15.5502	0.581412	0.874283	0.665016	0.50604	0.887855	PD/Ctrl	MG
s__Ruminococcaceae species incertae sedis [meta_mOTU_v3_12789]	spec	3.806	0.757786	0.550384	1.37683	0.168565	0.807581	PD/Ctrl	MG
s__Ruminococcaceae species incertae sedis [meta_mOTU_v3_12898]	spec	1.5804	0.774778	0.549234	1.41065	0.158347	0.804957	PD/Ctrl	MG
s__Ruminococcaceae species incertae sedis [meta_mOTU_v3_13455]	spec	2.75911	0.351895	0.58556	0.600954	0.54787	0.887855	PD/Ctrl	MG
s__Ruminococcus bicirculans [ref_mOTU_v3_02792]	spec	121.143	-0.312424	0.629628	-0.496205	0.61975	0.892055	PD/Ctrl	MG
s__Ruminococcus bromii [ref_mOTU_v3_00853]	spec	430.598	0.0168617	0.748759	0.0225195	0.982034	0.997246	PD/Ctrl	MG
s__Ruminococcus lactaris [ref_mOTU_v3_01595]	spec	28.3202	-0.289265	0.693145	-0.417322	0.676443	0.926609	PD/Ctrl	MG
s__Ruminococcus sp. [ref_mOTU_v3_03681]	spec	5.64528	-1.19504	0.83074	-1.43853	0.150285	0.794658	PD/Ctrl	MG
s__Ruminococcus sp. CAG:177 [meta_mOTU_v3_12400]	spec	96.7018	0.709305	1.01522	0.698671	0.484758	0.887855	PD/Ctrl	MG
s__Ruminococcus species incertae sedis [ext_mOTU_v3_26707]	spec	20.0016	1.57058	1.03631	1.51555	0.129634	0.762143	PD/Ctrl	MG
s__Ruthenibacterium lactatiformans [ref_mOTU_v3_04716]	spec	16.2568	0.801034	0.400362	2.00077	0.0454168	0.447265	PD/Ctrl	MG
s__Senegalimassilia anaerobia [ref_mOTU_v3_06538]	spec	6.88385	0.0043515	0.642032	0.00677769	0.994592	0.997246	PD/Ctrl	MG
s__Streptococcus gordonii [ref_mOTU_v3_03970]	spec	0.525782	0.199526	0.544307	0.366569	0.713941	0.934173	PD/Ctrl	MG
s__Streptococcus parasanguinis [ref_mOTU_v3_00312]	spec	5.82345	0.66422	0.399589	1.66226	0.0964608	0.721581	PD/Ctrl	MG
s__Streptococcus salivarius [ref_mOTU_v3_01350]	spec	15.9548	1.67786	0.453255	3.70181	0.000214069	0.0275435	PD/Ctrl	MG
s__Streptococcus sanguinis [ref_mOTU_v3_01591]	spec	0.545715	0.0290956	0.465519	0.0625014	0.950164	0.984513	PD/Ctrl	MG
s__Streptococcus sp. [ref_mOTU_v3_00283]	spec	1.27605	-0.373737	0.401374	-0.931145	0.351779	0.882878	PD/Ctrl	MG
s__Streptococcus thermophilus [ref_mOTU_v3_01348]	spec	12.8901	-1.45706	0.450965	-3.23099	0.00123362	0.0793628	PD/Ctrl	MG
s__Sutterella wadsworthensis [ref_mOTU_v3_03066]	spec	13.4552	0.175685	0.928899	0.189133	0.849989	0.959344	PD/Ctrl	MG
s__uncultured Blautia sp. [ref_mOTU_v3_03662]	spec	2.67562	0.714628	0.621169	1.15046	0.249956	0.857135	PD/Ctrl	MG
s__uncultured Blautia sp. [ref_mOTU_v3_11916]	spec	4.7628	1.68481	0.471688	3.57188	0.000354433	0.0342028	PD/Ctrl	MG
s__uncultured Clostridium sp. [ref_mOTU_v3_06391]	spec	1.86521	-0.667695	0.442836	-1.50777	0.131614	0.762143	PD/Ctrl	MG
s__uncultured Clostridium sp. [ref_mOTU_v3_11606]	spec	1.74496	-0.0581007	0.498443	-0.116565	0.907205	0.984513	PD/Ctrl	MG
s__uncultured Clostridium sp. [ref_mOTU_v3_11607]	spec	1.81627	0.0908185	0.62317	0.145736	0.884129	0.975068	PD/Ctrl	MG
s__uncultured Eubacterium sp. [meta_mOTU_v3_13514]	spec	12.9919	0.0900886	0.41778	0.215637	0.829271	0.955182	PD/Ctrl	MG
s__uncultured Eubacterium sp. [ref_mOTU_v3_08868]	spec	2.45677	-0.147507	0.371027	-0.397563	0.690952	0.926609	PD/Ctrl	MG
s__Veillonella atypica [ref_mOTU_v3_01941]	spec	0.453087	0.107253	0.463816	0.23124	0.817128	0.955182	PD/Ctrl	MG
s__Veillonella parvula [ref_mOTU_v3_01938]	spec	1.03957	1.08902	0.521433	2.08851	0.0367519	0.415198	PD/Ctrl	MG
s__[Clostridium] asparagiforme/lavalense [ref_mOTU_v3_06317]	spec	1.25593	0.167872	0.490233	0.342433	0.732025	0.993754	iRBD/Ctrl	MG
s__[Clostridium] citroniae [ref_mOTU_v3_04828]	spec	0.75558	-0.463385	0.462248	-1.00246	0.316122	0.823019	iRBD/Ctrl	MG
s__[Clostridium] clostridioforme/bolteae [ref_mOTU_v3_03442]	spec	3.66415	-0.178092	0.655208	-0.27181	0.785768	0.993754	iRBD/Ctrl	MG
s__[Clostridium] glycyrrhizinilyticum [ref_mOTU_v3_03672]	spec	1.2163	-0.0971395	0.718639	-0.135172	0.892476	0.993754	iRBD/Ctrl	MG
s__[Clostridium] leptum [ref_mOTU_v3_03688]	spec	3.6282	0.477189	0.453878	1.05136	0.293094	0.802547	iRBD/Ctrl	MG
s__[Clostridium] scindens [ref_mOTU_v3_03437]	spec	2.59496	2.84098	0.825755	3.44047	#N/A	#N/A	iRBD/Ctrl	MG
s__[Clostridium] spiroforme [ref_mOTU_v3_11181]	spec	1.38532	0.502192	0.8254	0.608422	0.542908	0.972403	iRBD/Ctrl	MG
s__[Clostridium] symbiosum [ref_mOTU_v3_04652]	spec	0.75177	0.101463	0.610253	0.166263	0.86795	0.993754	iRBD/Ctrl	MG
s__[Eubacterium] eligens [ref_mOTU_v3_02375]	spec	5.11151	-0.31817	0.973239	-0.326918	0.74373	0.993754	iRBD/Ctrl	MG
s__[Eubacterium] eligens [ref_mOTU_v3_02376]	spec	45.7297	-0.216375	0.715613	-0.302363	0.762376	0.993754	iRBD/Ctrl	MG
s__[Eubacterium] hallii [ref_mOTU_v3_03632]	spec	45.7262	0.795445	0.486938	1.63356	0.10235	0.598595	iRBD/Ctrl	MG
s__[Eubacterium] rectale [ref_mOTU_v3_03657]	spec	328.011	-0.314769	0.616226	-0.510801	0.609491	0.979314	iRBD/Ctrl	MG
s__[Eubacterium] siraeum [ref_mOTU_v3_02370]	spec	60.4924	0.543791	0.690914	0.787061	0.431246	0.915398	iRBD/Ctrl	MG
s__[Eubacterium] sulci [ref_mOTU_v3_06466]	spec	0.406015	-0.557864	0.531716	-1.04918	0.294097	0.802547	iRBD/Ctrl	MG
s__[Ruminococcus] gnavus [ref_mOTU_v3_01594]	spec	12.622	0.553484	0.752385	0.735639	0.46195	0.918554	iRBD/Ctrl	MG
s__[Ruminococcus] torques [ref_mOTU_v3_03659]	spec	18.9646	-1.19359	0.791642	-1.50774	0.13162	0.61109	iRBD/Ctrl	MG
s__[Ruminococcus] torques [ref_mOTU_v3_03660]	spec	45.636	-0.599428	0.629826	-0.951735	0.341231	0.844328	iRBD/Ctrl	MG
s__[Ruminococcus] torques [ref_mOTU_v3_03703]	spec	20.3631	0.0111329	0.606115	0.0183677	0.985346	0.999435	iRBD/Ctrl	MG
s__Acinetobacter sp. [ref_mOTU_v3_02372]	spec	11.4518	0.230734	1.19842	0.192531	0.847326	0.993754	iRBD/Ctrl	MG
s__Acinetobacter species incertae sedis [meta_mOTU_v3_12662]	spec	16.9412	0.252798	1.22524	0.206325	0.836537	0.993754	iRBD/Ctrl	MG
s__Actinobacteria sp. [ref_mOTU_v3_01911]	spec	2.00336	-0.322864	0.412741	-0.782245	0.434071	0.915398	iRBD/Ctrl	MG
s__Actinomyces graevenitzii [ref_mOTU_v3_04054]	spec	0.908482	-0.118019	0.412147	-0.286352	0.774608	0.993754	iRBD/Ctrl	MG
s__Actinomyces naeslundii [ref_mOTU_v3_02018]	spec	0.481575	-0.332511	0.571321	-0.582003	0.560564	0.972403	iRBD/Ctrl	MG
s__Actinomyces oris [ref_mOTU_v3_02019]	spec	2.35576	0.433405	0.399749	1.08419	0.278279	0.784057	iRBD/Ctrl	MG
s__Actinomyces sp. [ref_mOTU_v3_01913]	spec	0.952875	0.0182525	0.661284	0.0276016	0.97798	0.999435	iRBD/Ctrl	MG
s__Actinomyces sp. ICM47 [ref_mOTU_v3_01914]	spec	1.35023	0.269526	0.437164	0.616532	0.537543	0.972403	iRBD/Ctrl	MG
s__Actinomyces sp. oral taxon 448 [ref_mOTU_v3_12049]	spec	0.585326	-0.545626	0.546058	-0.999208	0.317694	0.823019	iRBD/Ctrl	MG
s__Actinomyces species incertae sedis [ext_mOTU_v3_17926]	spec	1.57927	-0.808077	0.512191	-1.57769	0.114638	0.61109	iRBD/Ctrl	MG
s__Actinomyces species incertae sedis [ext_mOTU_v3_19569]	spec	0.877102	0.445197	0.717059	0.620865	0.534689	0.972403	iRBD/Ctrl	MG
s__Adlercreutzia equolifaciens [ref_mOTU_v3_08094]	spec	7.3886	0.0557151	0.479915	0.116094	0.907578	0.993754	iRBD/Ctrl	MG
s__Akkermansia muciniphila [ref_mOTU_v3_03591]	spec	129.808	1.40514	0.822548	1.70828	0.0875852	0.563465	iRBD/Ctrl	MG
s__Alistipes finegoldii [ref_mOTU_v3_03682]	spec	13.2356	1.50611	0.792588	1.90024	0.057401	0.433592	iRBD/Ctrl	MG
s__Alistipes finegoldii/onderdonkii [ref_mOTU_v3_03069]	spec	122.22	-0.0292923	0.708538	-0.0413419	0.967023	0.99848	iRBD/Ctrl	MG
s__Alistipes ihumii [ref_mOTU_v3_07379]	spec	9.81834	2.02179	0.66317	3.04867	0.00229856	0.0591496	iRBD/Ctrl	MG
s__Alistipes indistinctus [ref_mOTU_v3_11860]	spec	2.3132	0.312681	0.730109	0.428266	0.668457	0.993754	iRBD/Ctrl	MG
s__Alistipes obesi [ref_mOTU_v3_06695]	spec	24.0782	2.09889	0.639255	3.28334	0.00102584	0.0282838	iRBD/Ctrl	MG
s__Alistipes putredinis [ref_mOTU_v3_03683]	spec	114.636	0.307823	0.638225	0.482311	0.629585	0.979314	iRBD/Ctrl	MG
s__Alistipes senegalensis [ref_mOTU_v3_01017]	spec	3.31327	0.910352	0.965081	0.943291	0.345532	0.848611	iRBD/Ctrl	MG
s__Alistipes shahii [ref_mOTU_v3_01014]	spec	35.6758	0.922279	0.615501	1.49842	0.134024	0.61109	iRBD/Ctrl	MG
s__Anaeromassilibacillus species incertae sedis [meta_mOTU_v3_13295]	spec	2.18529	1.06102	0.495725	2.14034	0.032327	0.357336	iRBD/Ctrl	MG
s__Anaerostipes hadrus [ref_mOTU_v3_00856]	spec	83.1283	0.709138	0.454381	1.56067	0.118602	0.61109	iRBD/Ctrl	MG
s__Anaerostipes hadrus [ref_mOTU_v3_00857]	spec	79.3805	0.359583	0.424475	0.847123	0.396926	0.885958	iRBD/Ctrl	MG
s__Anaerotruncus colihominis [ref_mOTU_v3_03438]	spec	1.49566	0.518162	0.688776	0.752293	0.451875	0.918554	iRBD/Ctrl	MG
s__Anaerotruncus rubiinfantis [ref_mOTU_v3_09169]	spec	0.920755	0.609681	0.407449	1.49633	0.134566	0.61109	iRBD/Ctrl	MG
s__Atopobiaceae species incertae sedis [meta_mOTU_v3_13944]	spec	5.51986	0.374939	0.766809	0.48896	0.62487	0.979314	iRBD/Ctrl	MG
s__Bacteria species incertae sedis [ext_mOTU_v3_16372]	spec	3.11264	-0.331092	1.05057	-0.315156	#N/A	#N/A	iRBD/Ctrl	MG
s__bacterium LF-3 [ref_mOTU_v3_03628]	spec	34.8378	-0.135044	0.63729	-0.211903	0.832183	0.993754	iRBD/Ctrl	MG
s__Bacteroidales species incertae sedis [meta_mOTU_v3_12262]	spec	8.88477	0.65118	0.467199	1.3938	0.163379	0.693014	iRBD/Ctrl	MG
s__Bacteroidales species incertae sedis [meta_mOTU_v3_13286]	spec	6.08971	0.412403	0.661404	0.623527	0.532939	0.972403	iRBD/Ctrl	MG
s__Bacteroides caccae [ref_mOTU_v3_03473]	spec	24.2632	-0.216569	0.725194	-0.298637	0.765217	0.993754	iRBD/Ctrl	MG
s__Bacteroides caecimuris [ref_mOTU_v3_03476]	spec	11.7787	-2.12682	0.835616	-2.54522	0.010921	0.183283	iRBD/Ctrl	MG
s__Bacteroides dorei/vulgatus [ref_mOTU_v3_02367]	spec	183.27	-0.511924	0.385704	-1.32725	0.184428	0.726419	iRBD/Ctrl	MG
s__Bacteroides fragilis [ref_mOTU_v3_01597]	spec	9.42416	0.27762	0.916719	0.302841	0.762011	0.993754	iRBD/Ctrl	MG
s__Bacteroides massiliensis [ref_mOTU_v3_02135]	spec	32.0272	-1.50418	1.34164	-1.12115	0.262222	0.781299	iRBD/Ctrl	MG
s__Bacteroides sp. [ref_mOTU_v3_02810]	spec	20.488	1.72095	1.01913	1.68865	0.0912859	0.564369	iRBD/Ctrl	MG
s__Bacteroides sp. [ref_mOTU_v3_03475]	spec	58.2741	0.00453758	0.525937	0.00862761	0.993116	0.999435	iRBD/Ctrl	MG
s__Bacteroides species incertae sedis [ext_mOTU_v3_17504]	spec	2.82275	1.02307	0.893282	1.14529	0.252087	0.779776	iRBD/Ctrl	MG
s__Bacteroides stercoris [ref_mOTU_v3_01579]	spec	64.4542	1.09465	1.18632	0.922721	0.356153	0.848611	iRBD/Ctrl	MG
s__Bacteroides thetaiotaomicron [ref_mOTU_v3_01657]	spec	29.7556	-0.067315	0.516043	-0.130445	0.896215	0.993754	iRBD/Ctrl	MG
s__Bacteroides uniformis [ref_mOTU_v3_00855]	spec	238.685	1.2687	0.532525	2.38242	0.0171991	0.237101	iRBD/Ctrl	MG
s__Barnesiella intestinihominis [ref_mOTU_v3_03595]	spec	34.1382	0.584658	0.530989	1.10108	0.270864	0.781299	iRBD/Ctrl	MG
s__Bifidobacterium adolescentis [ref_mOTU_v3_02703]	spec	159.993	0.0737891	0.849412	0.0868709	0.930774	0.99848	iRBD/Ctrl	MG
s__Bifidobacterium catenulatum/kashiwanohense [ref_mOTU_v3_02701]	spec	9.6166	-0.232001	1.13925	-0.203644	#N/A	#N/A	iRBD/Ctrl	MG
s__Bifidobacterium dentium [ref_mOTU_v3_02698]	spec	3.71521	-1.23376	0.924303	-1.3348	0.18194	0.72401	iRBD/Ctrl	MG
s__Bifidobacterium longum [ref_mOTU_v3_01099]	spec	79.3393	-0.205632	0.601454	-0.341891	0.732433	0.993754	iRBD/Ctrl	MG
s__Bifidobacterium ruminantium [ref_mOTU_v3_02702]	spec	71.0689	1.27357	1.37854	0.923854	0.355563	0.848611	iRBD/Ctrl	MG
s__Bilophila wadsworthia [ref_mOTU_v3_04300]	spec	13.365	-0.254151	0.498945	-0.509377	0.610488	0.979314	iRBD/Ctrl	MG
s__Bittarella massiliensis [ref_mOTU_v3_04646]	spec	1.57918	-0.0602254	0.306295	-0.196625	0.844121	0.993754	iRBD/Ctrl	MG
s__Blautia massiliensis [ref_mOTU_v3_03342]	spec	81.6884	0.035549	0.434305	0.0818527	0.934764	0.99848	iRBD/Ctrl	MG
s__Blautia obeum [ref_mOTU_v3_05139]	spec	50.016	0.386772	0.452436	0.854866	0.392625	0.885958	iRBD/Ctrl	MG
s__Blautia obeum [ref_mOTU_v3_05140]	spec	12.6095	0.123907	0.48798	0.253918	0.799559	0.993754	iRBD/Ctrl	MG
s__Blautia obeum/wexlerae [ref_mOTU_v3_02154]	spec	220.732	0.255358	0.308559	0.827584	0.407906	0.885958	iRBD/Ctrl	MG
s__Butyricicoccus sp. [ref_mOTU_v3_02967]	spec	1.10717	0.0213877	0.395833	0.0540323	0.956909	0.99848	iRBD/Ctrl	MG
s__Butyricicoccus species incertae sedis [meta_mOTU_v3_12336]	spec	27.6755	0.174608	0.362145	0.482149	0.6297	0.979314	iRBD/Ctrl	MG
s__Butyricicoccus species incertae sedis [meta_mOTU_v3_12617]	spec	9.86857	-0.00420431	0.9295	-0.00452319	0.996391	0.999435	iRBD/Ctrl	MG
s__Clostridia species incertae sedis [ext_mOTU_v3_26753]	spec	0.760384	1.31401	0.580079	2.26523	0.0234986	0.302349	iRBD/Ctrl	MG
s__Clostridiaceae species incertae sedis [meta_mOTU_v3_12983]	spec	6.77728	0.331898	0.925543	0.358598	0.719896	0.993754	iRBD/Ctrl	MG
s__Clostridiales Family XIII. Incertae Sedis species incertae sedis [ext_mOTU_v3_16322]	spec	0.813463	0.643659	0.654901	0.982834	0.325689	0.826235	iRBD/Ctrl	MG
s__Clostridiales Family XIII. Incertae Sedis species incertae sedis [ext_mOTU_v3_16402]	spec	2.2519	0.849715	0.553301	1.53572	0.124607	0.61109	iRBD/Ctrl	MG
s__Clostridiales Family XIII. Incertae Sedis species incertae sedis [ext_mOTU_v3_17436]	spec	1.26005	0.287656	0.690058	0.416857	0.676783	0.993754	iRBD/Ctrl	MG
s__Clostridiales Family XIII. Incertae Sedis species incertae sedis [ext_mOTU_v3_17501]	spec	2.95667	-1.38983	0.772606	-1.79889	0.0720366	0.496538	iRBD/Ctrl	MG
s__Clostridiales Family XIII. Incertae Sedis species incertae sedis [ext_mOTU_v3_26457]	spec	2.52383	0.0671197	0.773989	0.0867193	0.930895	0.99848	iRBD/Ctrl	MG
s__Clostridiales Family XIII. Incertae Sedis species incertae sedis [ext_mOTU_v3_28958]	spec	1.87041	0.0735369	0.584665	0.125776	0.899909	0.993754	iRBD/Ctrl	MG
s__Clostridiales sp. [ref_mOTU_v3_02968]	spec	3.66526	0.718473	0.375016	1.91585	0.0553848	0.433592	iRBD/Ctrl	MG
s__Clostridiales sp. [ref_mOTU_v3_03634]	spec	58.9061	-0.625045	1.36021	-0.459521	0.64586	0.987576	iRBD/Ctrl	MG
s__Clostridiales sp. [ref_mOTU_v3_03658]	spec	24.9784	-0.77901	0.66076	-1.17896	0.238413	0.774192	iRBD/Ctrl	MG
s__Clostridiales sp. [ref_mOTU_v3_05137]	spec	5.18926	-0.503623	0.408599	-1.23256	0.217739	0.774192	iRBD/Ctrl	MG
s__Clostridiales sp. [ref_mOTU_v3_05138]	spec	0.578454	1.3038	0.511797	2.54749	0.0108501	0.183283	iRBD/Ctrl	MG
s__Clostridiales species incertae sedis [ext_mOTU_v3_16178]	spec	1.0395	0.976059	0.708903	1.37686	0.168556	0.693186	iRBD/Ctrl	MG
s__Clostridiales species incertae sedis [ext_mOTU_v3_16181]	spec	4.90423	0.250876	0.735699	0.341004	0.733101	0.993754	iRBD/Ctrl	MG
s__Clostridiales species incertae sedis [ext_mOTU_v3_16216]	spec	5.16602	3.68522	0.899191	4.09837	4.16067e-05	0.00321204	iRBD/Ctrl	MG
s__Clostridiales species incertae sedis [ext_mOTU_v3_16417]	spec	1.00236	0.90063	0.534701	1.68436	0.092112	0.564369	iRBD/Ctrl	MG
s__Clostridiales species incertae sedis [ext_mOTU_v3_16427]	spec	2.08421	0.797536	0.420741	1.89555	0.0580196	0.433592	iRBD/Ctrl	MG
s__Clostridiales species incertae sedis [ext_mOTU_v3_17441]	spec	1.22829	-0.170297	0.775835	-0.219502	0.826259	0.993754	iRBD/Ctrl	MG
s__Clostridiales species incertae sedis [ext_mOTU_v3_17443]	spec	2.44981	0.054659	0.901793	0.0606115	0.951669	0.99848	iRBD/Ctrl	MG
s__Clostridiales species incertae sedis [ext_mOTU_v3_17600]	spec	4.3048	-0.357065	1.03404	-0.34531	#N/A	#N/A	iRBD/Ctrl	MG
s__Clostridiales species incertae sedis [ext_mOTU_v3_17865]	spec	2.05668	-0.639976	0.878698	-0.728323	0.466416	0.918554	iRBD/Ctrl	MG
s__Clostridiales species incertae sedis [ext_mOTU_v3_17908]	spec	0.938759	0.78602	0.650617	1.20811	0.227003	0.774192	iRBD/Ctrl	MG
s__Clostridiales species incertae sedis [ext_mOTU_v3_17948]	spec	1.08526	0.629961	0.52165	1.20763	0.227189	0.774192	iRBD/Ctrl	MG
s__Clostridiales species incertae sedis [ext_mOTU_v3_17987]	spec	7.48735	0.165204	0.634067	0.260547	0.794442	0.993754	iRBD/Ctrl	MG
s__Clostridiales species incertae sedis [ext_mOTU_v3_17995]	spec	1.53886	0.305166	0.371065	0.822406	0.410846	0.885958	iRBD/Ctrl	MG
s__Clostridiales species incertae sedis [ext_mOTU_v3_18011]	spec	0.908826	0.210674	0.692331	0.304296	0.760902	0.993754	iRBD/Ctrl	MG
s__Clostridiales species incertae sedis [ext_mOTU_v3_18262]	spec	0.553515	-0.333122	0.608356	-0.547578	0.583982	0.972403	iRBD/Ctrl	MG
s__Clostridiales species incertae sedis [ext_mOTU_v3_24979]	spec	1.51709	-0.113976	0.730321	-0.156063	0.875984	0.993754	iRBD/Ctrl	MG
s__Clostridiales species incertae sedis [ext_mOTU_v3_26501]	spec	4.54923	1.3624	0.636804	2.13943	0.0324009	0.357336	iRBD/Ctrl	MG
s__Clostridiales species incertae sedis [ext_mOTU_v3_26505]	spec	1.80261	-0.762194	0.55952	-1.36223	0.173126	0.703437	iRBD/Ctrl	MG
s__Clostridiales species incertae sedis [ext_mOTU_v3_26520]	spec	3.44417	-0.704166	0.848565	-0.829832	0.406634	0.885958	iRBD/Ctrl	MG
s__Clostridiales species incertae sedis [ext_mOTU_v3_26595]	spec	1.94805	-0.131429	0.819154	-0.160444	0.872531	0.993754	iRBD/Ctrl	MG
s__Clostridiales species incertae sedis [ext_mOTU_v3_26617]	spec	1.82276	0.899761	0.711947	1.2638	0.206301	0.774192	iRBD/Ctrl	MG
s__Clostridiales species incertae sedis [ext_mOTU_v3_26621]	spec	3.08105	0.985425	0.997357	0.988036	0.323135	0.826235	iRBD/Ctrl	MG
s__Clostridiales species incertae sedis [ext_mOTU_v3_26664]	spec	1.26694	-0.222385	0.767514	-0.289747	0.77201	0.993754	iRBD/Ctrl	MG
s__Clostridiales species incertae sedis [ext_mOTU_v3_26734]	spec	1.63608	-0.764264	0.888979	-0.85971	0.389949	0.885958	iRBD/Ctrl	MG
s__Clostridiales species incertae sedis [ext_mOTU_v3_26949]	spec	2.2556	-0.890589	0.858209	-1.03773	0.299396	0.802547	iRBD/Ctrl	MG
s__Clostridiales species incertae sedis [ext_mOTU_v3_28767]	spec	0.727681	-0.0331556	0.528515	-0.0627336	0.949979	0.99848	iRBD/Ctrl	MG
s__Clostridiales species incertae sedis [ext_mOTU_v3_33163]	spec	2.00442	1.37242	0.747828	1.83521	0.0664753	0.475175	iRBD/Ctrl	MG
s__Clostridiales species incertae sedis [meta_mOTU_v3_12252]	spec	49.3218	0.557524	0.674644	0.826397	0.408579	0.885958	iRBD/Ctrl	MG
s__Clostridiales species incertae sedis [meta_mOTU_v3_12253]	spec	65.8976	0.848248	0.881714	0.962044	0.336028	0.836817	iRBD/Ctrl	MG
s__Clostridiales species incertae sedis [meta_mOTU_v3_12254]	spec	87.6728	-0.255884	1.12305	-0.227848	0.819765	0.993754	iRBD/Ctrl	MG
s__Clostridiales species incertae sedis [meta_mOTU_v3_12265]	spec	58.7409	0.00232304	0.843019	0.00275562	0.997801	0.999435	iRBD/Ctrl	MG
s__Clostridiales species incertae sedis [meta_mOTU_v3_12272]	spec	52.2244	1.30478	1.10957	1.17593	0.239622	0.774192	iRBD/Ctrl	MG
s__Clostridiales species incertae sedis [meta_mOTU_v3_12284]	spec	76.7064	-0.000404979	0.571828	-0.000708218	0.999435	0.999435	iRBD/Ctrl	MG
s__Clostridiales species incertae sedis [meta_mOTU_v3_12288]	spec	40.1604	0.848671	0.616746	1.37605	0.168807	0.693186	iRBD/Ctrl	MG
s__Clostridiales species incertae sedis [meta_mOTU_v3_12301]	spec	28.2689	0.861334	0.517304	1.66504	0.0959039	0.57842	iRBD/Ctrl	MG
s__Clostridiales species incertae sedis [meta_mOTU_v3_12307]	spec	15.1885	4.75828	0.903108	5.26878	#N/A	#N/A	iRBD/Ctrl	MG
s__Clostridiales species incertae sedis [meta_mOTU_v3_12309]	spec	10.3856	0.274731	1.03431	0.265618	0.790534	0.993754	iRBD/Ctrl	MG
s__Clostridiales species incertae sedis [meta_mOTU_v3_12323]	spec	9.06736	0.742569	1.17078	0.634253	0.525916	0.972403	iRBD/Ctrl	MG
s__Clostridiales species incertae sedis [meta_mOTU_v3_12327]	spec	26.636	0.051894	1.06375	0.0487841	0.961091	0.99848	iRBD/Ctrl	MG
s__Clostridiales species incertae sedis [meta_mOTU_v3_12334]	spec	36.881	0.131736	0.892755	0.147561	0.882689	0.993754	iRBD/Ctrl	MG
s__Clostridiales species incertae sedis [meta_mOTU_v3_12351]	spec	3.00485	0.798693	0.65766	1.21445	0.224577	0.774192	iRBD/Ctrl	MG
s__Clostridiales species incertae sedis [meta_mOTU_v3_12356]	spec	25.9447	0.176197	0.54372	0.324059	0.745893	0.993754	iRBD/Ctrl	MG
s__Clostridiales species incertae sedis [meta_mOTU_v3_12361]	spec	26.1337	-0.635264	0.760057	-0.83581	0.403262	0.885958	iRBD/Ctrl	MG
s__Clostridiales species incertae sedis [meta_mOTU_v3_12371]	spec	16.0632	2.13461	1.2342	1.72954	#N/A	#N/A	iRBD/Ctrl	MG
s__Clostridiales species incertae sedis [meta_mOTU_v3_12411]	spec	25.276	0.169258	0.908636	0.186277	0.852227	0.993754	iRBD/Ctrl	MG
s__Clostridiales species incertae sedis [meta_mOTU_v3_12437]	spec	47.0131	-0.142644	1.02838	-0.138708	0.889681	0.993754	iRBD/Ctrl	MG
s__Clostridiales species incertae sedis [meta_mOTU_v3_12445]	spec	2.68333	0.0377369	0.410179	0.0920009	0.926697	0.99848	iRBD/Ctrl	MG
s__Clostridiales species incertae sedis [meta_mOTU_v3_12447]	spec	5.09405	-1.49327	0.957271	-1.55993	0.118777	0.61109	iRBD/Ctrl	MG
s__Clostridiales species incertae sedis [meta_mOTU_v3_12452]	spec	77.0604	0.924548	0.951787	0.971381	0.331358	0.830548	iRBD/Ctrl	MG
s__Clostridiales species incertae sedis [meta_mOTU_v3_12463]	spec	61.2341	0.258309	0.824858	0.313156	0.754162	0.993754	iRBD/Ctrl	MG
s__Clostridiales species incertae sedis [meta_mOTU_v3_12473]	spec	4.80439	-0.800014	1.0746	-0.744476	0.456589	0.918554	iRBD/Ctrl	MG
s__Clostridiales species incertae sedis [meta_mOTU_v3_12476]	spec	18.6998	-0.220828	0.458165	-0.481984	0.629817	0.979314	iRBD/Ctrl	MG
s__Clostridiales species incertae sedis [meta_mOTU_v3_12494]	spec	13.9394	-0.37855	1.0424	-0.363152	0.716492	0.993754	iRBD/Ctrl	MG
s__Clostridiales species incertae sedis [meta_mOTU_v3_12521]	spec	32.6269	0.565381	1.01469	0.557198	0.577392	0.972403	iRBD/Ctrl	MG
s__Clostridiales species incertae sedis [meta_mOTU_v3_12522]	spec	4.7836	-0.386953	0.68723	-0.563062	0.573392	0.972403	iRBD/Ctrl	MG
s__Clostridiales species incertae sedis [meta_mOTU_v3_12554]	spec	3.86421	-0.47067	0.480684	-0.979168	0.327497	0.826235	iRBD/Ctrl	MG
s__Clostridiales species incertae sedis [meta_mOTU_v3_12556]	spec	12.0088	0.41658	0.730037	0.570629	0.568251	0.972403	iRBD/Ctrl	MG
s__Clostridiales species incertae sedis [meta_mOTU_v3_12563]	spec	74.9305	-0.0587342	0.423069	-0.138829	0.889585	0.993754	iRBD/Ctrl	MG
s__Clostridiales species incertae sedis [meta_mOTU_v3_12623]	spec	7.29679	4.86644	0.988637	4.92237	8.55022e-07	0.000330038	iRBD/Ctrl	MG
s__Clostridiales species incertae sedis [meta_mOTU_v3_12631]	spec	4.70418	0.438858	0.613428	0.715419	0.47435	0.924743	iRBD/Ctrl	MG
s__Clostridiales species incertae sedis [meta_mOTU_v3_12635]	spec	34.5092	0.148886	0.555771	0.267891	0.788783	0.993754	iRBD/Ctrl	MG
s__Clostridiales species incertae sedis [meta_mOTU_v3_12668]	spec	13.7528	3.31316	0.76871	4.31003	1.6323e-05	0.00157517	iRBD/Ctrl	MG
s__Clostridiales species incertae sedis [meta_mOTU_v3_12707]	spec	34.4726	-0.284389	0.638287	-0.44555	0.655922	0.989008	iRBD/Ctrl	MG
s__Clostridiales species incertae sedis [meta_mOTU_v3_12755]	spec	12.0303	1.66653	1.07835	1.54545	0.122238	0.61109	iRBD/Ctrl	MG
s__Clostridiales species incertae sedis [meta_mOTU_v3_12776]	spec	7.37823	-2.04296	0.681262	-2.99879	0.00271053	0.061545	iRBD/Ctrl	MG
s__Clostridiales species incertae sedis [meta_mOTU_v3_12786]	spec	8.37617	0.525467	0.432527	1.21488	0.224412	0.774192	iRBD/Ctrl	MG
s__Clostridiales species incertae sedis [meta_mOTU_v3_12851]	spec	0.841759	0.896425	0.611839	1.46513	0.142885	0.641321	iRBD/Ctrl	MG
s__Clostridiales species incertae sedis [meta_mOTU_v3_12873]	spec	30.4888	2.36898	1.23832	1.91305	0.0557416	0.433592	iRBD/Ctrl	MG
s__Clostridiales species incertae sedis [meta_mOTU_v3_12952]	spec	3.41904	1.83027	0.480727	3.80729	0.000140501	0.0064778	iRBD/Ctrl	MG
s__Clostridiales species incertae sedis [meta_mOTU_v3_13006]	spec	3.15975	0.73224	0.64693	1.13187	0.25769	0.779776	iRBD/Ctrl	MG
s__Clostridiales species incertae sedis [meta_mOTU_v3_13012]	spec	8.50617	0.000446803	1.05747	0.000422521	#N/A	#N/A	iRBD/Ctrl	MG
s__Clostridiales species incertae sedis [meta_mOTU_v3_13031]	spec	1.34508	0.826659	0.756739	1.0924	0.274659	0.784057	iRBD/Ctrl	MG
s__Clostridiales species incertae sedis [meta_mOTU_v3_13115]	spec	3.46039	1.50804	0.857953	1.75772	0.0787945	0.524391	iRBD/Ctrl	MG
s__Clostridiales species incertae sedis [meta_mOTU_v3_13140]	spec	1.00172	0.558305	0.604164	0.924094	0.355437	0.848611	iRBD/Ctrl	MG
s__Clostridiales species incertae sedis [meta_mOTU_v3_13147]	spec	9.928	-1.37656	0.882517	-1.55981	0.118806	0.61109	iRBD/Ctrl	MG
s__Clostridiales species incertae sedis [meta_mOTU_v3_13155]	spec	3.36766	-0.5552	1.02006	-0.544284	0.586246	0.972403	iRBD/Ctrl	MG
s__Clostridiales species incertae sedis [meta_mOTU_v3_13165]	spec	2.18869	1.97971	0.667665	2.96512	0.00302566	0.0648837	iRBD/Ctrl	MG
s__Clostridiales species incertae sedis [meta_mOTU_v3_13168]	spec	13.3671	-1.03064	0.713045	-1.44541	0.148343	0.658164	iRBD/Ctrl	MG
s__Clostridiales species incertae sedis [meta_mOTU_v3_13187]	spec	11.4679	-0.808921	0.815374	-0.992086	#N/A	#N/A	iRBD/Ctrl	MG
s__Clostridiales species incertae sedis [meta_mOTU_v3_13200]	spec	8.88812	0.60045	0.643957	0.932438	0.35111	0.848611	iRBD/Ctrl	MG
s__Clostridiales species incertae sedis [meta_mOTU_v3_13202]	spec	7.24137	-0.0299809	1.15471	-0.025964	0.979286	0.999435	iRBD/Ctrl	MG
s__Clostridiales species incertae sedis [meta_mOTU_v3_13280]	spec	17.6034	-2.83003	1.15343	-2.45359	0.0141438	0.209981	iRBD/Ctrl	MG
s__Clostridiales species incertae sedis [meta_mOTU_v3_13304]	spec	5.35469	-0.700956	1.02091	-0.686598	0.492336	0.936166	iRBD/Ctrl	MG
s__Clostridiales species incertae sedis [meta_mOTU_v3_13377]	spec	3.98938	-0.50145	0.455765	-1.10024	0.271228	0.781299	iRBD/Ctrl	MG
s__Clostridiales species incertae sedis [meta_mOTU_v3_13390]	spec	15.9783	-3.44964	0.974977	-3.53818	0.0004029	0.0155519	iRBD/Ctrl	MG
s__Clostridiales species incertae sedis [meta_mOTU_v3_13415]	spec	7.60029	0.467152	0.844936	0.552884	0.580343	0.972403	iRBD/Ctrl	MG
s__Clostridiales species incertae sedis [meta_mOTU_v3_13572]	spec	7.44836	3.44733	0.73477	4.69172	2.70918e-06	0.000522871	iRBD/Ctrl	MG
s__Clostridiales species incertae sedis [meta_mOTU_v3_13662]	spec	7.62712	-0.505917	0.828089	-0.610946	0.541235	0.972403	iRBD/Ctrl	MG
s__Clostridiales species incertae sedis [meta_mOTU_v3_13701]	spec	8.8354	-0.917025	0.77273	-1.18673	0.235332	0.774192	iRBD/Ctrl	MG
s__Clostridiales species incertae sedis [meta_mOTU_v3_13729]	spec	3.29238	2.86491	0.94763	3.02323	0.00250089	0.060334	iRBD/Ctrl	MG
s__Clostridiales species incertae sedis [meta_mOTU_v3_13774]	spec	3.13895	0.106258	0.916249	0.115971	0.907676	0.993754	iRBD/Ctrl	MG
s__Clostridiales species incertae sedis [meta_mOTU_v3_13792]	spec	2.75575	0.912865	0.982868	0.928776	0.353005	0.848611	iRBD/Ctrl	MG
s__Clostridiales species incertae sedis [meta_mOTU_v3_13863]	spec	3.45461	-0.331274	0.563299	-0.588096	0.556468	0.972403	iRBD/Ctrl	MG
s__Clostridiales species incertae sedis [meta_mOTU_v3_13922]	spec	4.00214	0.444264	0.986354	0.450411	0.652414	0.987576	iRBD/Ctrl	MG
s__Clostridiales species incertae sedis [meta_mOTU_v3_13923]	spec	1.68867	1.99202	0.76854	2.59195	0.0095433	0.175415	iRBD/Ctrl	MG
s__Clostridiales species incertae sedis [meta_mOTU_v3_13955]	spec	6.06241	1.19844	1.0369	1.15579	0.247767	0.779776	iRBD/Ctrl	MG
s__Clostridiales species incertae sedis [meta_mOTU_v3_14166]	spec	8.66457	-0.302802	0.422225	-0.717159	0.473276	0.924743	iRBD/Ctrl	MG
s__Clostridiales species incertae sedis [meta_mOTU_v3_14425]	spec	2.10863	-0.219587	0.592002	-0.370923	0.710695	0.993754	iRBD/Ctrl	MG
s__Clostridium phoceensis [ref_mOTU_v3_08865]	spec	14.564	0.20431	0.3402	0.600557	0.548135	0.972403	iRBD/Ctrl	MG
s__Clostridium saudiense/disporicum [ref_mOTU_v3_04336]	spec	1.93559	-0.0659851	0.891472	-0.0740181	0.940996	0.99848	iRBD/Ctrl	MG
s__Clostridium sp. [ref_mOTU_v3_03622]	spec	10.3121	0.232012	0.427093	0.543235	0.586968	0.972403	iRBD/Ctrl	MG
s__Clostridium sp. [ref_mOTU_v3_03680]	spec	25.5806	-0.00164059	0.422483	-0.00388321	0.996902	0.999435	iRBD/Ctrl	MG
s__Clostridium sp. CAG:127 [meta_mOTU_v3_12306]	spec	60.8414	-1.69724	1.26113	-1.34581	0.178362	0.717165	iRBD/Ctrl	MG
s__Clostridium sp. CAG:138 [meta_mOTU_v3_12233]	spec	75.781	1.45574	0.918114	1.58558	0.112836	0.61109	iRBD/Ctrl	MG
s__Clostridium sp. CAG:217 [meta_mOTU_v3_12270]	spec	88.389	0.777518	1.35255	0.574855	0.565389	0.972403	iRBD/Ctrl	MG
s__Clostridium sp. CAG:273 [meta_mOTU_v3_12673]	spec	10.8453	1.86705	0.986502	1.8926	0.0584114	0.433592	iRBD/Ctrl	MG
s__Clostridium sp. CAG:58 [ref_mOTU_v3_07640]	spec	4.41033	-0.603665	0.664631	-0.908272	0.363735	0.860548	iRBD/Ctrl	MG
s__Clostridium sp. CAG:7 [ref_mOTU_v3_07647]	spec	15.7353	-0.651457	0.533161	-1.22188	0.221753	0.774192	iRBD/Ctrl	MG
s__Clostridium sp. Marseille-P3244 [ref_mOTU_v3_10248]	spec	0.538573	0.534799	0.493025	1.08473	0.278041	0.784057	iRBD/Ctrl	MG
s__Clostridium species incertae sedis [ext_mOTU_v3_17323]	spec	2.21759	-0.22335	0.463665	-0.481705	0.630015	0.979314	iRBD/Ctrl	MG
s__Clostridium species incertae sedis [ext_mOTU_v3_17404]	spec	2.72656	-0.201825	0.528355	-0.381987	0.702471	0.993754	iRBD/Ctrl	MG
s__Clostridium species incertae sedis [ext_mOTU_v3_17427]	spec	7.51918	0.062267	0.426407	0.146027	0.8839	0.993754	iRBD/Ctrl	MG
s__Clostridium species incertae sedis [ext_mOTU_v3_17477]	spec	2.87647	-0.610148	0.824397	-0.740115	0.45923	0.918554	iRBD/Ctrl	MG
s__Clostridium species incertae sedis [ext_mOTU_v3_17741]	spec	1.7518	0.786482	0.702941	1.11884	0.263206	0.781299	iRBD/Ctrl	MG
s__Clostridium species incertae sedis [ext_mOTU_v3_26503]	spec	1.87672	-1.05777	0.542082	-1.95131	0.0510205	0.433592	iRBD/Ctrl	MG
s__Clostridium species incertae sedis [meta_mOTU_v3_12324]	spec	3.07328	0.109117	0.875086	0.124693	0.900766	0.993754	iRBD/Ctrl	MG
s__Clostridium species incertae sedis [meta_mOTU_v3_12399]	spec	14.3394	0.262041	1.13212	0.231461	0.816957	0.993754	iRBD/Ctrl	MG
s__Clostridium species incertae sedis [meta_mOTU_v3_12417]	spec	30.2268	0.830504	0.663509	1.25169	0.210685	0.774192	iRBD/Ctrl	MG
s__Clostridium species incertae sedis [meta_mOTU_v3_12640]	spec	18.2005	-0.091578	0.771419	-0.118714	0.905502	0.993754	iRBD/Ctrl	MG
s__Collinsella aerofaciens [ref_mOTU_v3_03626]	spec	58.3819	-0.242108	0.507179	-0.477362	0.633104	0.979314	iRBD/Ctrl	MG
s__Collinsella bouchesdurhonensis [ref_mOTU_v3_03627]	spec	6.8887	0.219527	0.840262	0.26126	0.793892	0.993754	iRBD/Ctrl	MG
s__Collinsella species incertae sedis [ext_mOTU_v3_17329]	spec	3.71623	0.0630575	0.993129	0.0634938	0.949373	0.99848	iRBD/Ctrl	MG
s__Collinsella species incertae sedis [ext_mOTU_v3_17334]	spec	4.60758	-0.41947	0.598636	-0.700709	0.483485	0.928483	iRBD/Ctrl	MG
s__Collinsella species incertae sedis [ext_mOTU_v3_17335]	spec	3.3149	-1.19175	0.677021	-1.76028	0.0783606	0.524391	iRBD/Ctrl	MG
s__Collinsella species incertae sedis [ext_mOTU_v3_17337]	spec	50.351	0.0652779	0.555883	0.117431	0.906518	0.993754	iRBD/Ctrl	MG
s__Collinsella species incertae sedis [ext_mOTU_v3_17345]	spec	21.3038	0.301126	0.93079	0.323516	0.746304	0.993754	iRBD/Ctrl	MG
s__Collinsella species incertae sedis [ext_mOTU_v3_17348]	spec	47.7304	-0.262616	0.534344	-0.491473	0.623092	0.979314	iRBD/Ctrl	MG
s__Collinsella species incertae sedis [ext_mOTU_v3_17351]	spec	2.84602	-0.375225	0.938483	-0.399821	0.689288	0.993754	iRBD/Ctrl	MG
s__Collinsella species incertae sedis [ext_mOTU_v3_17637]	spec	2.01724	-0.0700846	0.83103	-0.0843346	0.93279	0.99848	iRBD/Ctrl	MG
s__Collinsella species incertae sedis [ext_mOTU_v3_26711]	spec	7.50273	-0.739216	1.11652	-0.662074	0.507924	0.956384	iRBD/Ctrl	MG
s__Collinsella species incertae sedis [ext_mOTU_v3_28721]	spec	1.60362	0.177985	0.808292	0.220199	0.825716	0.993754	iRBD/Ctrl	MG
s__Collinsella species incertae sedis [meta_mOTU_v3_12451]	spec	6.29808	-1.02703	0.817831	-1.25579	0.209191	0.774192	iRBD/Ctrl	MG
s__Coprobacillus cateniformis [ref_mOTU_v3_03929]	spec	2.03844	1.01015	0.972946	1.03824	0.299158	0.802547	iRBD/Ctrl	MG
s__Coprobacter fastidiosus [ref_mOTU_v3_03667]	spec	2.88021	2.84158	0.706548	4.02177	5.77613e-05	0.00371598	iRBD/Ctrl	MG
s__Coprococcus catus [ref_mOTU_v3_11851]	spec	24.6449	0.15117	0.544539	0.277611	0.781311	0.993754	iRBD/Ctrl	MG
s__Coprococcus comes [ref_mOTU_v3_03690]	spec	50.5788	-0.146115	0.54554	-0.267835	0.788826	0.993754	iRBD/Ctrl	MG
s__Coprococcus eutactus [ref_mOTU_v3_02378]	spec	40.3018	0.98751	1.40422	0.703246	0.481902	0.928483	iRBD/Ctrl	MG
s__Coriobacteriia species incertae sedis [ext_mOTU_v3_26765]	spec	4.05553	-2.07287	0.865244	-2.3957	0.0165885	0.237101	iRBD/Ctrl	MG
s__Desulfovibrio species incertae sedis [ext_mOTU_v3_16415]	spec	2.01102	1.11747	0.734412	1.52158	0.128114	0.61109	iRBD/Ctrl	MG
s__Dialister invisus [ref_mOTU_v3_03691]	spec	64.4369	0.159636	1.37997	0.115681	0.907905	0.993754	iRBD/Ctrl	MG
s__Dorea formicigenerans [ref_mOTU_v3_03668]	spec	27.2469	-0.49382	0.358766	-1.37644	0.168685	0.693186	iRBD/Ctrl	MG
s__Dorea longicatena [ref_mOTU_v3_03692]	spec	68.0343	-0.183037	0.565654	-0.323585	0.746253	0.993754	iRBD/Ctrl	MG
s__Dorea longicatena [ref_mOTU_v3_03693]	spec	20.6153	-1.22702	0.644061	-1.90513	0.056763	0.433592	iRBD/Ctrl	MG
s__Eggerthella lenta [ref_mOTU_v3_00719]	spec	12.2715	1.24013	0.671594	1.84655	0.0648123	0.47203	iRBD/Ctrl	MG
s__Eggerthella species incertae sedis [meta_mOTU_v3_12316]	spec	34.0405	-0.766267	0.92781	-0.825887	0.408868	0.885958	iRBD/Ctrl	MG
s__Eggerthellaceae species incertae sedis [ext_mOTU_v3_15443]	spec	9.53823	-0.274488	0.485833	-0.564983	0.572085	0.972403	iRBD/Ctrl	MG
s__Eggerthellaceae species incertae sedis [ext_mOTU_v3_16295]	spec	3.12435	0.409935	0.386483	1.06068	0.288836	0.802091	iRBD/Ctrl	MG
s__Eggerthellaceae species incertae sedis [ext_mOTU_v3_17307]	spec	4.32129	0.578336	0.746871	0.774345	0.438727	0.915398	iRBD/Ctrl	MG
s__Eggerthellaceae species incertae sedis [ext_mOTU_v3_17308]	spec	2.75574	0.87269	0.72811	1.19857	0.230696	0.774192	iRBD/Ctrl	MG
s__Eggerthellaceae species incertae sedis [ext_mOTU_v3_17907]	spec	8.60526	1.95457	0.949298	2.05896	0.0394982	0.393635	iRBD/Ctrl	MG
s__Eggerthellaceae species incertae sedis [meta_mOTU_v3_12569]	spec	20.0687	-0.563125	0.764476	-0.736616	0.461356	0.918554	iRBD/Ctrl	MG
s__Eggerthellaceae species incertae sedis [meta_mOTU_v3_13204]	spec	29.2608	-0.260294	0.6588	-0.395103	0.692767	0.993754	iRBD/Ctrl	MG
s__Eisenbergiella tayi [ref_mOTU_v3_03446]	spec	2.00007	1.55401	0.678683	2.28974	0.0220363	0.293311	iRBD/Ctrl	MG
s__Erysipelatoclostridium ramosum [ref_mOTU_v3_03439]	spec	2.60909	0.978192	0.955655	1.02358	#N/A	#N/A	iRBD/Ctrl	MG
s__Erysipelotrichaceae species incertae sedis [ext_mOTU_v3_16223]	spec	1.67143	-0.44566	0.574366	-0.775916	0.437798	0.915398	iRBD/Ctrl	MG
s__Escherichia coli [ref_mOTU_v3_00095]	spec	85.3041	1.35092	0.823707	1.64005	0.100994	0.598595	iRBD/Ctrl	MG
s__Eubacteriaceae bacterium CHKCI005 [ref_mOTU_v3_09413]	spec	0.897111	-0.105614	0.580691	-0.181877	0.855679	0.993754	iRBD/Ctrl	MG
s__Eubacterium ramulus [ref_mOTU_v3_03570]	spec	16.5036	-0.9059	0.586919	-1.54348	0.122713	0.61109	iRBD/Ctrl	MG
s__Eubacterium sp. [ref_mOTU_v3_03633]	spec	5.81954	1.17136	0.830116	1.41108	0.158222	0.678598	iRBD/Ctrl	MG
s__Eubacterium sp. CAG:156 [ref_mOTU_v3_07673]	spec	3.2844	-0.141397	0.99116	-0.142658	0.88656	0.993754	iRBD/Ctrl	MG
s__Eubacterium sp. CAG:180 [ref_mOTU_v3_07675]	spec	87.6512	0.732239	1.27607	0.573823	0.566087	0.972403	iRBD/Ctrl	MG
s__Eubacterium sp. CAG:202 [meta_mOTU_v3_12308]	spec	179.358	0.725185	1.58617	0.457193	0.647532	0.987576	iRBD/Ctrl	MG
s__Eubacterium sp. CAG:38 [ref_mOTU_v3_07679]	spec	15.2068	-0.0636105	0.639061	-0.0995374	0.920712	0.9983	iRBD/Ctrl	MG
s__Eubacterium species incertae sedis [ext_mOTU_v3_16236]	spec	41.5697	0.00314629	0.595035	0.00528757	0.995781	0.999435	iRBD/Ctrl	MG
s__Eubacterium species incertae sedis [meta_mOTU_v3_12260]	spec	8.05901	-0.906632	0.924529	-0.980642	0.326769	0.826235	iRBD/Ctrl	MG
s__Eubacterium species incertae sedis [meta_mOTU_v3_12314]	spec	15.0987	-0.0135013	0.637121	-0.0211911	0.983093	0.999435	iRBD/Ctrl	MG
s__Eubacterium species incertae sedis [meta_mOTU_v3_13196]	spec	7.26355	0.924776	0.78619	1.17627	0.239485	0.774192	iRBD/Ctrl	MG
s__Eubacterium ventriosum [ref_mOTU_v3_11151]	spec	11.756	-0.0343569	0.704945	-0.0487371	0.961129	0.99848	iRBD/Ctrl	MG
s__Faecalibacterium prausnitzii [ref_mOTU_v3_06108]	spec	165.949	0.0234801	0.496609	0.0472808	0.962289	0.99848	iRBD/Ctrl	MG
s__Faecalibacterium prausnitzii [ref_mOTU_v3_06109]	spec	149.451	-1.00733	0.663576	-1.51804	0.129005	0.61109	iRBD/Ctrl	MG
s__Faecalibacterium prausnitzii [ref_mOTU_v3_06110]	spec	145.814	-1.21545	0.597261	-2.03504	0.0418472	0.393976	iRBD/Ctrl	MG
s__Faecalibacterium prausnitzii [ref_mOTU_v3_06112]	spec	211.81	0.135844	0.534895	0.253963	0.799524	0.993754	iRBD/Ctrl	MG
s__Faecalibacterium sp. [ref_mOTU_v3_03636]	spec	112.923	0.132426	1.15597	0.114558	0.908795	0.993754	iRBD/Ctrl	MG
s__Faecalibacterium species incertae sedis [ext_mOTU_v3_18130]	spec	7.45917	-0.420078	0.883027	-0.475725	0.634271	0.979314	iRBD/Ctrl	MG
s__Faecalibacterium species incertae sedis [ext_mOTU_v3_26216]	spec	7.32897	0.281384	0.880626	0.319527	0.749327	0.993754	iRBD/Ctrl	MG
s__Faecalibacterium species incertae sedis [meta_mOTU_v3_12325]	spec	100.153	-0.186457	0.615833	-0.302772	0.762064	0.993754	iRBD/Ctrl	MG
s__Faecalibacterium species incertae sedis [meta_mOTU_v3_12331]	spec	40.9873	-0.113824	0.775184	-0.146834	0.883263	0.993754	iRBD/Ctrl	MG
s__Faecalibacterium species incertae sedis [meta_mOTU_v3_12403]	spec	41.6204	0.147817	0.755605	0.195628	0.844902	0.993754	iRBD/Ctrl	MG
s__Faecalicatena contorta [ref_mOTU_v3_03445]	spec	1.59987	1.40761	0.565755	2.48802	0.0128457	0.19849	iRBD/Ctrl	MG
s__Firmicutes bacterium ADurb.Bin467 [meta_mOTU_v3_12694]	spec	2.64719	0.432989	0.728702	0.594192	0.552384	0.972403	iRBD/Ctrl	MG
s__Firmicutes bacterium CAG:102 [ref_mOTU_v3_07726]	spec	9.69333	-1.0328	0.81362	-1.26938	0.204304	0.774192	iRBD/Ctrl	MG
s__Firmicutes sp. [ref_mOTU_v3_02374]	spec	29.106	0.0369669	0.983792	0.0375759	0.970026	0.99848	iRBD/Ctrl	MG
s__Firmicutes sp. [ref_mOTU_v3_02743]	spec	1.36858	0.50912	0.504417	1.00932	0.312819	0.821417	iRBD/Ctrl	MG
s__Firmicutes sp. [ref_mOTU_v3_03629]	spec	13.7419	1.35027	1.12202	1.20342	0.228813	0.774192	iRBD/Ctrl	MG
s__Firmicutes sp. [ref_mOTU_v3_03641]	spec	25.6027	0.896107	1.22615	0.730828	0.464884	0.918554	iRBD/Ctrl	MG
s__Firmicutes species incertae sedis [ext_mOTU_v3_26597]	spec	6.90057	-0.762192	0.862562	-0.883638	0.376892	0.876387	iRBD/Ctrl	MG
s__Firmicutes species incertae sedis [ext_mOTU_v3_26969]	spec	2.95748	0.0256806	0.653011	0.0393264	0.96863	0.99848	iRBD/Ctrl	MG
s__Firmicutes species incertae sedis [meta_mOTU_v3_12285]	spec	25.7403	-1.33037	1.17549	-1.13175	0.257738	0.779776	iRBD/Ctrl	MG
s__Firmicutes species incertae sedis [meta_mOTU_v3_12845]	spec	1.91322	0.719613	0.674007	1.06767	0.285672	0.799052	iRBD/Ctrl	MG
s__Firmicutes species incertae sedis [meta_mOTU_v3_13945]	spec	2.24192	0.19282	0.655706	0.294064	0.768709	0.993754	iRBD/Ctrl	MG
s__Flavonifractor plautii [ref_mOTU_v3_02971]	spec	7.47486	0.507119	0.492529	1.02962	0.303187	0.803745	iRBD/Ctrl	MG
s__Flavonifractor plautii [ref_mOTU_v3_05238]	spec	3.29225	0.310741	0.451192	0.688711	0.491005	0.936166	iRBD/Ctrl	MG
s__Flavonifractor species incertae sedis [ext_mOTU_v3_17315]	spec	4.48854	-0.50932	0.617098	-0.825347	0.409175	0.885958	iRBD/Ctrl	MG
s__Flavonifractor species incertae sedis [ext_mOTU_v3_17316]	spec	2.01301	-1.20478	0.582828	-2.06712	0.0387227	0.393635	iRBD/Ctrl	MG
s__Fusicatenibacter saccharivorans [ref_mOTU_v3_02680]	spec	28.9417	-1.53063	1.01389	-1.50967	0.131128	0.61109	iRBD/Ctrl	MG
s__Gemella sanguinis [ref_mOTU_v3_04303]	spec	0.407459	0.100147	0.559511	0.178991	0.857945	0.993754	iRBD/Ctrl	MG
s__Haemophilus parainfluenzae [ref_mOTU_v3_01068]	spec	1.16395	-1.24874	0.803957	-1.55324	0.120366	0.61109	iRBD/Ctrl	MG
s__Holdemanella biformis [meta_mOTU_v3_12329]	spec	67.9896	-0.573224	1.00714	-0.569158	0.569249	0.972403	iRBD/Ctrl	MG
s__Holdemania filiformis [ref_mOTU_v3_05921]	spec	1.51647	0.96469	0.509121	1.89482	0.0581168	0.433592	iRBD/Ctrl	MG
s__Holdemania sp. Marseille-P2844 [ref_mOTU_v3_05920]	spec	0.862586	-0.951508	0.745086	-1.27705	0.201586	0.774192	iRBD/Ctrl	MG
s__Intestinibacter bartlettii [ref_mOTU_v3_03687]	spec	6.27792	0.213362	0.60938	0.350129	0.726242	0.993754	iRBD/Ctrl	MG
s__Intestinimonas butyriciproducens [ref_mOTU_v3_03928]	spec	1.48756	0.526398	0.449954	1.16989	0.242044	0.774192	iRBD/Ctrl	MG
s__Intestinimonas massiliensis [ref_mOTU_v3_02970]	spec	2.22869	1.51177	0.69359	2.17962	0.0292853	0.342549	iRBD/Ctrl	MG
s__Lachnospiraceae species incertae sedis [ext_mOTU_v3_16177]	spec	9.37957	0.113614	0.677586	0.167674	0.866839	0.993754	iRBD/Ctrl	MG
s__Lachnospiraceae species incertae sedis [ext_mOTU_v3_16248]	spec	13.3052	-0.0575495	0.418281	-0.137586	0.890568	0.993754	iRBD/Ctrl	MG
s__Lachnospiraceae species incertae sedis [ext_mOTU_v3_16262]	spec	0.806472	-0.0845925	0.54067	-0.156459	0.875672	0.993754	iRBD/Ctrl	MG
s__Lachnospiraceae species incertae sedis [ext_mOTU_v3_16268]	spec	0.892031	-0.277278	0.674262	-0.411231	0.680903	0.993754	iRBD/Ctrl	MG
s__Lachnospiraceae species incertae sedis [ext_mOTU_v3_17428]	spec	1.55252	-0.52154	0.703257	-0.741606	0.458326	0.918554	iRBD/Ctrl	MG
s__Lachnospiraceae species incertae sedis [ext_mOTU_v3_17986]	spec	7.3199	-0.290775	0.720414	-0.403622	0.686491	0.993754	iRBD/Ctrl	MG
s__Lachnospiraceae species incertae sedis [ext_mOTU_v3_26654]	spec	3.97224	0.311711	0.86692	0.359562	0.719175	0.993754	iRBD/Ctrl	MG
s__Lachnospiraceae species incertae sedis [meta_mOTU_v3_12240]	spec	157.788	0.320878	0.371741	0.863177	0.38804	0.885958	iRBD/Ctrl	MG
s__Lactobacillus sakei [ref_mOTU_v3_01607]	spec	1.1813	0.0746318	0.725875	0.102816	0.918109	0.998282	iRBD/Ctrl	MG
s__Lactococcus lactis [ref_mOTU_v3_01300]	spec	2.26762	0.301066	0.567047	0.530937	0.595463	0.979314	iRBD/Ctrl	MG
s__Lactococcus lactis [ref_mOTU_v3_01301]	spec	1.93789	-1.01724	0.900403	-1.12976	0.258578	0.779776	iRBD/Ctrl	MG
s__Lentisphaerae species incertae sedis [meta_mOTU_v3_12568]	spec	2.43397	0.0293086	0.696514	0.042079	0.966436	0.99848	iRBD/Ctrl	MG
s__Massilimaliae massiliensis [ref_mOTU_v3_10172]	spec	0.533812	0.469994	0.551752	0.851822	0.394313	0.885958	iRBD/Ctrl	MG
s__Massilioclostridium coli [ref_mOTU_v3_10237]	spec	1.26717	-0.193309	0.372089	-0.519524	0.603395	0.979314	iRBD/Ctrl	MG
s__Methanobrevibacter smithii [ref_mOTU_v3_03695]	spec	49.6111	1.45664	1.13966	1.27813	0.201202	0.774192	iRBD/Ctrl	MG
s__Mogibacterium species incertae sedis [meta_mOTU_v3_12290]	spec	0.992616	-0.056596	0.466356	-0.121358	0.903408	0.993754	iRBD/Ctrl	MG
s__Odoribacter splanchnicus [ref_mOTU_v3_03697]	spec	11.4173	0.218657	0.291164	0.750976	0.452667	0.918554	iRBD/Ctrl	MG
s__Oscillibacter sp. [ref_mOTU_v3_03341]	spec	19.7355	0.113107	0.406007	0.278584	0.780564	0.993754	iRBD/Ctrl	MG
s__Oscillibacter sp. [ref_mOTU_v3_04664]	spec	85.369	-0.882138	0.618172	-1.42701	0.153577	0.666075	iRBD/Ctrl	MG
s__Oscillibacter sp. 57_20 [meta_mOTU_v3_12282]	spec	3.27911	-0.675447	0.549806	-1.22852	0.219253	0.774192	iRBD/Ctrl	MG
s__Oscillibacter sp. 57_20 [meta_mOTU_v3_12610]	spec	25.7695	0.404416	0.673481	0.600485	0.548183	0.972403	iRBD/Ctrl	MG
s__Oscillibacter sp. 57_20 [ref_mOTU_v3_10413]	spec	2.92265	0.431647	0.650687	0.663371	0.507093	0.956384	iRBD/Ctrl	MG
s__Oscillibacter species incertae sedis [ext_mOTU_v3_16208]	spec	3.63807	-1.15727	0.611244	-1.8933	0.0583177	0.433592	iRBD/Ctrl	MG
s__Oscillibacter species incertae sedis [ext_mOTU_v3_16336]	spec	1.20661	0.787528	0.512144	1.53771	0.12412	0.61109	iRBD/Ctrl	MG
s__Oscillibacter species incertae sedis [ext_mOTU_v3_17444]	spec	2.0761	0.371295	0.601535	0.617247	0.537072	0.972403	iRBD/Ctrl	MG
s__Oscillibacter species incertae sedis [ext_mOTU_v3_17445]	spec	1.44001	-0.260605	0.737488	-0.353369	0.723812	0.993754	iRBD/Ctrl	MG
s__Oscillibacter species incertae sedis [ext_mOTU_v3_17772]	spec	1.9095	-0.403235	0.789225	-0.510925	0.609403	0.979314	iRBD/Ctrl	MG
s__Oscillibacter species incertae sedis [ext_mOTU_v3_17930]	spec	2.66856	0.718342	0.324577	2.21316	0.0268863	0.324316	iRBD/Ctrl	MG
s__Oscillibacter species incertae sedis [ext_mOTU_v3_17998]	spec	3.42584	-0.181655	0.972679	-0.186757	0.851851	0.993754	iRBD/Ctrl	MG
s__Oscillibacter species incertae sedis [ext_mOTU_v3_18125]	spec	5.9956	-0.085141	0.605463	-0.140621	0.888169	0.993754	iRBD/Ctrl	MG
s__Oscillibacter species incertae sedis [ext_mOTU_v3_28927]	spec	1.59824	-0.749993	0.632073	-1.18656	0.235401	0.774192	iRBD/Ctrl	MG
s__Parabacteroides distasonis [ref_mOTU_v3_03640]	spec	34.4428	0.311053	0.44341	0.701503	0.482989	0.928483	iRBD/Ctrl	MG
s__Parabacteroides merdae [ref_mOTU_v3_05401]	spec	32.9462	0.299856	0.608172	0.493045	0.621981	0.979314	iRBD/Ctrl	MG
s__Parabacteroides species incertae sedis [ext_mOTU_v3_26659]	spec	1.69453	0.32527	0.758084	0.429068	0.667874	0.993754	iRBD/Ctrl	MG
s__Parabacteroides species incertae sedis [ext_mOTU_v3_26689]	spec	2.53998	-0.452703	0.856615	-0.528479	0.597167	0.979314	iRBD/Ctrl	MG
s__Paraprevotella clara [ref_mOTU_v3_03698]	spec	13.1223	0.0807144	1.229	0.0656751	0.947637	0.99848	iRBD/Ctrl	MG
s__Parasutterella excrementihominis [ref_mOTU_v3_03674]	spec	2.80863	-0.182612	0.729852	-0.250204	0.802429	0.993754	iRBD/Ctrl	MG
s__Peptostreptococcaceae species incertae sedis [meta_mOTU_v3_13426]	spec	2.95034	1.11068	1.00328	1.10705	0.268273	0.781299	iRBD/Ctrl	MG
s__Phocea massiliensis [ref_mOTU_v3_05236]	spec	0.927951	0.109388	0.474977	0.230301	0.817858	0.993754	iRBD/Ctrl	MG
s__Prevotella copri [ref_mOTU_v3_03701]	spec	287.988	-2.25377	1.10741	-2.03516	0.0418345	0.393976	iRBD/Ctrl	MG
s__Prevotella species incertae sedis [meta_mOTU_v3_12332]	spec	178.891	-2.70338	1.5775	-1.71371	0.0865811	0.563465	iRBD/Ctrl	MG
s__Pseudoflavonifractor capillosus [ref_mOTU_v3_02969]	spec	0.93091	-0.154404	0.560912	-0.275274	0.783106	0.993754	iRBD/Ctrl	MG
s__Pseudoflavonifractor species incertae sedis [meta_mOTU_v3_14283]	spec	4.30738	0.234252	0.516928	0.453162	0.650432	0.987576	iRBD/Ctrl	MG
s__Rikenellaceae sp. [ref_mOTU_v3_03593]	spec	13.0583	-0.612677	1.02695	-0.596598	0.550776	0.972403	iRBD/Ctrl	MG
s__Romboutsia timonensis [ref_mOTU_v3_09389]	spec	5.10277	0.528519	0.586004	0.901903	0.367108	0.860548	iRBD/Ctrl	MG
s__Roseburia hominis [ref_mOTU_v3_00861]	spec	24.2327	-0.860739	0.510367	-1.68651	0.0916976	0.564369	iRBD/Ctrl	MG
s__Roseburia intestinalis [ref_mOTU_v3_03702]	spec	44.78	-0.272676	0.745139	-0.365939	0.71441	0.993754	iRBD/Ctrl	MG
s__Roseburia inulinivorans [ref_mOTU_v3_00860]	spec	53.9802	-1.17082	0.524531	-2.23213	0.0256067	0.318845	iRBD/Ctrl	MG
[truncated: 1,911 more rows]

## Sheet: STable6
Supplementary Table 6. Differential abundance of taxonomically classified metaproteomic (MP) spectra.
a. Descriptive statistics by group. sd = standard deviation, fc = fold change.
Variable	Case_mean	Case_sd	Ctrl_mean	Ctrl_sd	iRBD_mean	iRBD_sd	PD_mean	PD_sd	fc_Case.Ctrl	fc_PD.Ctrl	fc_iRBD.Ctrl	fc_PD.iRBD
Actinobacteria	84.7892	122.509	49.7861	55.0189	53.6624	40.2567	101.909	147.496	1.70307	2.04693	1.07786	1.89907
Alistipes	176.567	403.683	98.3383	146.718	110.188	171.645	213.076	484.942	1.79551	2.16676	1.1205	1.93375
Bacilli	37.1619	70.8172	16.5844	20.2394	34.9117	72.7578	38.3995	70.6343	2.24077	2.3154	2.10509	1.0999
Bacteria	940.712	475.684	927.608	349.108	991.142	580.179	912.976	412.849	1.01413	-1.01603	1.06849	-1.08562
Bacteroidaceae	44.8931	72.5005	35.8347	71.3644	51.1972	78.2647	41.4259	69.9171	1.25278	1.15603	1.4287	-1.23587
Bacteroidales	644.456	580.296	616.524	301.507	677.427	376.324	626.322	670.444	1.0453	1.01589	1.09878	-1.0816
Bacteroides	3514.63	2861.31	3033.81	2804.54	4141.16	2903.18	3170.04	2814.94	1.15849	1.0449	1.365	-1.30634
Bacteroides.vulgatus	9.64375	20.5374	30.6203	75.2296	5.98163	11.1738	11.6579	24.099	-3.17515	-2.62657	-5.11906	1.94895
Bacteroidetes	47.2274	55.5281	49.9322	62.2953	53.3281	53.8572	43.872	56.8181	-1.05727	-1.13813	1.06801	-1.21554
Bifidobacterium	790.67	984.673	472.701	809.257	740.695	839.446	818.156	1065.32	1.67266	1.73081	1.56694	1.10458
Bifidobacterium.adolescentis	251.955	416.94	203.969	398.938	306.523	470.959	221.942	387.126	1.23526	1.08812	1.50279	-1.38109
Bifidobacterium.longum	190.342	355.408	108.744	194.847	142.809	166.94	216.486	424.955	1.75037	1.99078	1.31326	1.51591
Blautia	320.236	341.324	315.788	409.692	461.695	390.455	242.433	287.46	1.01408	-1.30258	1.46204	-1.90442
Clostridia	95.0082	160.613	81.8339	130.576	84.2824	105.7	100.907	185.019	1.16099	1.23308	1.02992	1.19725
Clostridiales	6954.58	3029.47	6723.45	2409.71	7837.77	2964.61	6468.83	2990.04	1.03438	-1.03936	1.16574	-1.21162
Clostridium	407.568	398.89	459.902	431.226	453.586	484.991	382.258	346.933	-1.12841	-1.20312	-1.01392	-1.1866
Collinsella	880.31	1099.47	675.307	636.151	652.203	612.468	1005.77	1281.9	1.30357	1.48935	-1.03542	1.54211
Coprococcus.catus	144.238	153.512	144.73	142.073	149.008	164.49	141.614	149.234	-1.00341	-1.022	1.02956	-1.05221
Coprococcus.comes	165.336	200.897	161.392	189.724	145.192	196.08	176.415	205.107	1.02444	1.09309	-1.11157	1.21504
Coriobacteriales	83.1292	119.835	98.6256	112.426	62.801	70.4713	94.3097	139.376	-1.18641	-1.04576	-1.57044	1.50172
Coriobacteriia	57.9481	60.9697	30.1367	32.8101	45.1134	62.364	65.0072	59.7996	1.92284	2.15708	1.49696	1.44097
Dorea	166.247	154.318	147.885	126.469	155.454	137.387	172.183	164.263	1.12416	1.1643	1.05118	1.10761
Dorea.longicatena	323.801	273.999	260.286	206.412	252.062	222.937	363.257	293.537	1.24402	1.39561	-1.03263	1.44114
Eggerthellaceae	28.8779	53.2121	17.6695	28.7587	44.1938	76.4182	20.4541	32.8514	1.63434	1.1576	2.50114	-2.16063
Eubacterium	203.37	211.552	225.623	229.697	206.345	236.806	201.734	199.492	-1.10942	-1.11842	-1.09343	-1.02285
Faecalibacterium	2318.88	1491.87	2556.19	1339.95	2345.4	1664.01	2304.29	1410.53	-1.10234	-1.10932	-1.08987	-1.01784
Firmicutes	1898.65	956.092	1823.32	780.619	2081.48	1096.54	1798.09	867.807	1.04131	-1.01403	1.14159	-1.15761
Lachnospiraceae	1388.9	1032.63	1212.7	1005.22	1512.67	947.283	1320.82	1082.25	1.14529	1.08915	1.24735	-1.14525
Lactobacillales	20.5944	50.2065	7.93496	11.751	20.3576	58.5765	20.7247	45.7712	2.5954	2.61182	2.56556	1.01803
Odoribacter.splanchnicus	25.5341	27.9338	16.5142	21.0052	28.4401	27.6295	23.9357	28.3201	1.54619	1.4494	1.72216	-1.18819
Oscillospiraceae	50.4957	67.9313	21.5154	32.6562	62.2388	84.9216	44.037	56.6922	2.34696	2.04677	2.89276	-1.41333
Proteobacteria	257.233	853.808	189.034	510.396	73.6713	197.188	358.192	1043.94	1.36078	1.89486	-2.56591	4.86204
Roseburia	918.502	989.786	1125.54	892.185	1236.85	1209.3	743.413	810.095	-1.22541	-1.51401	1.09889	-1.66374
Roseburia.faecis	25.6711	92.0073	15.5484	18.4753	46.2117	141.936	14.3737	44.9888	1.65105	-1.08172	2.97213	-3.21502
Roseburia.intestinalis	119.106	228.336	74.5893	122.426	155.212	315.199	99.248	164.049	1.59683	1.33059	2.08089	-1.56388
Roseburia.inulinivorans	177.852	247.661	144.706	146.039	118.406	191.565	210.548	270.344	1.22906	1.455	-1.22212	1.77818
Ruminococcaceae	468.68	373.154	515.148	268.149	505.773	319.912	448.279	401.846	-1.09914	-1.14917	-1.01853	-1.12825
Ruminococcus	1827.35	1604.02	1951.37	1453.64	2692.51	1925.9	1351.52	1171.58	-1.06787	-1.44384	1.3798	-1.99221
Ruminococcus.lactaris	84.7081	184.069	88.6038	146.394	61.6615	158.166	97.3837	197.634	-1.04599	1.09909	-1.43694	1.57933
Ruminococcus.sp_AF31.8BH	55.7856	133.37	73.8986	130.455	99.2205	200.197	31.8964	67.7571	-1.32469	-2.31683	1.34266	-3.11071
Streptococcus	230.09	597.607	65.1832	128.8	238.924	662.74	225.231	567.469	3.5299	3.45536	3.66542	-1.06079
Terrabacteria.group	154.127	129.593	150.746	83.2727	146.205	107.328	158.484	141.459	1.02243	1.05133	-1.03106	1.08398
Eubacterium_hallii	733.822	578.949	762.664	438.985	931.822	622.585	624.922	530.345	-1.0393	-1.22041	1.2218	-1.4911
unclassified.Firmicutes.sensu.stricto	211.054	281.739	188.16	214.698	210.871	317.441	211.154	264.374	1.12167	1.1222	1.1207	1.00134
Alistipes.putredinis.DSM.17216	112.396	140.51	103.54	119.711	129.538	142.586	102.968	140.27	1.08552	-1.00556	1.25108	-1.25804
Bacteroides.caccae	57.5313	93.7528	36.0077	54.7791	72.7879	118.453	49.1403	77.3889	1.59775	1.36471	2.02145	-1.48123
Bilophila	47.7906	77.0357	32.8126	38.6281	32.1142	42.364	56.4126	90.005	1.45647	1.71923	-1.02175	1.75663
Coprococcus	160.652	357.123	99.7087	209.331	194.154	464.625	142.226	286.808	1.61122	1.42642	1.94721	-1.3651
Coriobacteriaceae	32.6789	64.6155	15.9653	31.2311	26.8031	39.374	35.9106	75.269	2.04687	2.24929	1.67884	1.33979
Faecalibacterium.prausnitzii	400.304	374.449	513.535	453.826	368.338	336.737	417.885	396.681	-1.28286	-1.22889	-1.39419	1.13451
Gemmiger.formicilis	207.813	368.971	172.019	193.902	262.639	511.327	177.659	263.676	1.20808	1.03279	1.5268	-1.47833
Lactobacillus	177.69	841.78	11.2964	18.4164	18.3012	69.8662	265.355	1040.9	15.7299	23.4903	1.6201	14.4993
Methanobrevibacter	134.314	252.835	55.0478	134.419	179.905	344.435	109.239	185.171	2.43995	1.98444	3.26817	-1.6469
Parabacteroides	65.5921	93.5601	39.2032	59.2718	77.0076	68.7702	59.3137	105.028	1.67313	1.51298	1.96432	-1.29831
Roseburia.hominis	99.4833	177.768	77.6196	80.3431	141.764	251.483	76.2292	117.518	1.28168	-1.01824	1.82639	-1.8597
Ruminococcus.sp_AM42.11	277.72	318.671	215.97	243.477	337.854	434.504	244.646	232.415	1.28592	1.13278	1.56436	-1.38099
Saccharomycetaceae	43.6205	113.577	31.3603	76.2647	44.986	156.873	42.8695	83.2098	1.39095	1.367	1.43449	-1.04937
Subdoligranulum	14.075	26.8503	17.4241	28.1028	12.4267	23.2041	14.9815	28.902	-1.23795	-1.16304	-1.40215	1.20559
Subdoligranulum.sp_APC924.74	604.056	692.451	604.637	734.34	589.976	636.027	611.8	729.363	-1.00096	1.01185	-1.02485	1.03699
Eubacterium_eligens	28.1603	42.5097	27.1578	45.5313	28.6354	52.5179	27.8989	36.6211	1.03691	1.02729	1.05441	-1.0264
unclassified.Ruminococcaceae	20.5635	51.9797	39.7005	78.5672	8.35595	23.351	27.2777	61.6613	-1.93063	-1.45542	-4.75116	3.26446
Bacteroides.stercoris	129.892	313.299	24.7914	54.1371	201.257	366.003	90.6406	277.384	5.23937	3.65613	8.118	-2.22038
Blautia.obeum	260.634	265.393	236.634	252.633	268.845	280.894	256.119	260.041	1.10142	1.08234	1.13612	-1.04969
Butyricicoccus	5.13513	13.8247	10.2977	20.3712	3.6141	13.5229	5.97169	14.087	-2.00534	-1.72441	-2.8493	1.65233
Eubacterium.ramulus	46.9229	104.933	57.0585	93.8293	57.2874	151.549	41.2225	69.0039	-1.216	-1.38416	1.00401	-1.38971
Parabacteroides.merdae	74.5817	111.049	45.9302	72.0491	90.9179	120.163	65.5968	106.207	1.6238	1.42818	1.97948	-1.38601
Prevotella	1380.82	2460.3	2319.6	3134.66	1157.51	3004.95	1503.64	2135.85	-1.67987	-1.54265	-2.00395	1.29903
Prevotella.copri	747.407	1893.01	793.792	1684.6	92.7637	371.158	1107.46	2270.7	-1.06206	1.39515	-8.55714	11.9385
Ruminococcus.sp_AF21.42	23.6118	53.3919	48.626	86.7137	23.2905	58.8233	23.7885	50.9462	-2.0594	-2.0441	-2.0878	1.02138
Eubacterium_rectale	1011.48	1230.03	1047.91	954.921	1035.44	1276.29	998.304	1220.18	-1.03602	-1.04969	-1.01205	-1.0372
Eubacterium_siraeum	117.505	213.204	63.9995	119.729	98.036	120.312	128.214	250.943	1.83604	2.00336	1.53183	1.30782
Akkermansia.muciniphila	204.127	454.019	54.6002	126.53	271.829	527.539	166.891	410.552	3.73858	3.05659	4.97855	-1.62879
Lachnospira.pectinoschiza	180.829	262.113	109.366	172.887	212.776	307.426	163.259	235.958	1.65344	1.49278	1.94555	-1.30331
Streptococcaceae	18.4278	41.9923	8.86808	20.1745	15.4276	36.8692	20.0779	44.9248	2.07799	2.26406	1.73968	1.30143
Bifidobacteriaceae	20.9499	43.7764	10.8047	26.5135	15.7704	33.5961	23.7986	48.6435	1.93896	2.20262	1.45958	1.50907
Odoribacteraceae	8.09499	14.6512	5.4024	10.1955	7.76288	12.7047	8.27766	15.7715	1.49841	1.53222	1.43693	1.06631
b. Results of statistical comparisons between groups.
ANOVA for the case/control and control/iRBD/PD comparisons, corrected for age and sex, t-tests without confounder correction for two-group comparisons;
df = degrees of freedom, fdr = false discovery rate corrected P.
Variable	df	statistic	p	fdr	Contrast	Test
Actinobacteria	1	2.86852	0.0934406	0.394527	Case.Ctrl	Anova
Alistipes	1	1.21498	0.272994	0.554003	Case.Ctrl	Anova
Bacilli	1	1.49051	0.225008	0.502959	Case.Ctrl	Anova
Bacteria	1	0.118995	0.730852	0.853926	Case.Ctrl	Anova
Bacteroidaceae	1	0.0356067	0.850712	0.894997	Case.Ctrl	Anova
Bacteroidales	1	0.258232	0.612457	0.750753	Case.Ctrl	Anova
Bacteroides	1	2.16253	0.144551	0.442647	Case.Ctrl	Anova
Bacteroides.vulgatus	1	0.807197	0.371109	0.60009	Case.Ctrl	Anova
Bacteroidetes	1	2.93102	0.0899924	0.394527	Case.Ctrl	Anova
Bifidobacterium	1	2.52967	0.11488	0.438718	Case.Ctrl	Anova
Bifidobacterium.adolescentis	1	0.0372124	0.847424	0.894997	Case.Ctrl	Anova
Bifidobacterium.longum	1	4.86328	0.0297249	0.312929	Case.Ctrl	Anova
Blautia	1	0.737347	0.392566	0.608877	Case.Ctrl	Anova
Clostridia	1	1.7572	0.187995	0.469812	Case.Ctrl	Anova
Clostridiales	1	0.0602123	0.806664	0.894003	Case.Ctrl	Anova
Clostridium	1	0.979608	0.324684	0.5654	Case.Ctrl	Anova
Collinsella	1	1.72831	0.191634	0.469812	Case.Ctrl	Anova
Coprococcus.catus	1	0.109358	0.741568	0.853926	Case.Ctrl	Anova
Coprococcus.comes	1	0.00867533	0.925978	0.939536	Case.Ctrl	Anova
Coriobacteriales	1	2.98622	0.087063	0.394527	Case.Ctrl	Anova
Coriobacteriia	1	5.40273	0.0221278	0.312929	Case.Ctrl	Anova
Dorea	1	0.0570804	0.81166	0.894003	Case.Ctrl	Anova
Dorea.longicatena	1	0.0314188	0.859668	0.894997	Case.Ctrl	Anova
Eggerthellaceae	1	0.971179	0.326765	0.5654	Case.Ctrl	Anova
Eubacterium	1	0.356828	0.551624	0.722817	Case.Ctrl	Anova
Faecalibacterium	1	0.968874	0.327337	0.5654	Case.Ctrl	Anova
Firmicutes	1	0.0484296	0.826267	0.894997	Case.Ctrl	Anova
Lachnospiraceae	1	0.279891	0.597945	0.744981	Case.Ctrl	Anova
Lactobacillales	1	0.0903792	0.76432	0.86699	Case.Ctrl	Anova
Odoribacter.splanchnicus	1	3.05682	0.0834679	0.394527	Case.Ctrl	Anova
Oscillospiraceae	1	6.67228	0.0112394	0.312929	Case.Ctrl	Anova
Proteobacteria	1	0.811075	0.369967	0.60009	Case.Ctrl	Anova
Roseburia	1	5.85903	0.0173013	0.312929	Case.Ctrl	Anova
Roseburia.faecis	1	6.15725	0.0147551	0.312929	Case.Ctrl	Anova
Roseburia.intestinalis	1	0.199183	0.656346	0.779411	Case.Ctrl	Anova
Roseburia.inulinivorans	1	1.0726	0.302857	0.5654	Case.Ctrl	Anova
Ruminococcaceae	1	3.82636	0.0532423	0.312929	Case.Ctrl	Anova
Ruminococcus	1	0.878288	0.350929	0.59268	Case.Ctrl	Anova
Ruminococcus.lactaris	1	1.96723	0.163839	0.461928	Case.Ctrl	Anova
Ruminococcus.sp_AF31.8BH	1	1.16115	0.283819	0.554003	Case.Ctrl	Anova
Streptococcus	1	1.52582	0.219635	0.502959	Case.Ctrl	Anova
Terrabacteria.group	1	1.16466	0.283098	0.554003	Case.Ctrl	Anova
Eubacterium_hallii	1	0.486003	0.487333	0.676276	Case.Ctrl	Anova
unclassified.Firmicutes.sensu.stricto	1	0.317282	0.574506	0.740042	Case.Ctrl	Anova
Alistipes.putredinis.DSM.17216	1	0.4467	0.505446	0.676276	Case.Ctrl	Anova
Bacteroides.caccae	1	1.30039	0.256866	0.554003	Case.Ctrl	Anova
Bilophila	1	0.000450964	0.9831	0.9831	Case.Ctrl	Anova
Coprococcus	1	0.443008	0.507207	0.676276	Case.Ctrl	Anova
Coriobacteriaceae	1	1.81405	0.181067	0.469812	Case.Ctrl	Anova
Faecalibacterium.prausnitzii	1	2.15108	0.145607	0.442647	Case.Ctrl	Anova
Gemmiger.formicilis	1	3.89839	0.0510904	0.312929	Case.Ctrl	Anova
Lactobacillus	1	0.576537	0.449459	0.656902	Case.Ctrl	Anova
Methanobrevibacter	1	4.63979	0.0336415	0.312929	Case.Ctrl	Anova
Parabacteroides	1	4.19333	0.0432048	0.312929	Case.Ctrl	Anova
Roseburia.hominis	1	0.454476	0.501772	0.676276	Case.Ctrl	Anova
Ruminococcus.sp_AM42.11	1	0.208461	0.648967	0.779411	Case.Ctrl	Anova
Saccharomycetaceae	1	1.15887	0.284291	0.554003	Case.Ctrl	Anova
Subdoligranulum	1	1.89227	0.17202	0.46691	Case.Ctrl	Anova
Subdoligranulum.sp_APC924.74	1	2.52162	0.115452	0.438718	Case.Ctrl	Anova
Eubacterium_eligens	1	0.290011	0.59141	0.744981	Case.Ctrl	Anova
unclassified.Ruminococcaceae	1	1.61011	0.207422	0.492627	Case.Ctrl	Anova
Bacteroides.stercoris	1	3.032	0.0847124	0.394527	Case.Ctrl	Anova
Blautia.obeum	1	0.00839634	0.927174	0.939536	Case.Ctrl	Anova
Butyricicoccus	1	3.89948	0.0510586	0.312929	Case.Ctrl	Anova
Eubacterium.ramulus	1	0.708007	0.402114	0.609844	Case.Ctrl	Anova
Parabacteroides.merdae	1	2.23224	0.138307	0.442647	Case.Ctrl	Anova
Prevotella	1	3.92734	0.050252	0.312929	Case.Ctrl	Anova
Prevotella.copri	1	3.81705	0.0535274	0.312929	Case.Ctrl	Anova
Ruminococcus.sp_AF21.42	1	5.27182	0.0237603	0.312929	Case.Ctrl	Anova
Eubacterium_rectale	1	2.21891	0.139477	0.442647	Case.Ctrl	Anova
Eubacterium_siraeum	1	0.544679	0.462229	0.662818	Case.Ctrl	Anova
Akkermansia.muciniphila	1	0.774577	0.380915	0.603116	Case.Ctrl	Anova
Lachnospira.pectinoschiza	1	1.96472	0.164106	0.461928	Case.Ctrl	Anova
Streptococcaceae	1	2.30425	0.132175	0.442647	Case.Ctrl	Anova
Bifidobacteriaceae	1	1.01802	0.315425	0.5654	Case.Ctrl	Anova
Odoribacteraceae	1	0.686773	0.409238	0.609844	Case.Ctrl	Anova
Actinobacteria	2	2.0881	0.129347	0.409599	PD.iRBD.Ctrl	Anova
Alistipes	2	0.72081	0.488893	0.6619	PD.iRBD.Ctrl	Anova
Bacilli	2	0.957476	0.387386	0.635235	PD.iRBD.Ctrl	Anova
Bacteria	2	0.0604379	0.941387	0.946891	PD.iRBD.Ctrl	Anova
Bacteroidaceae	2	1.05011	0.353764	0.633538	PD.iRBD.Ctrl	Anova
Bacteroidales	2	1.20874	0.302942	0.622259	PD.iRBD.Ctrl	Anova
Bacteroides	2	3.11714	0.0486585	0.288435	PD.iRBD.Ctrl	Anova
Bacteroides.vulgatus	2	1.47364	0.23407	0.532012	PD.iRBD.Ctrl	Anova
Bacteroidetes	2	1.45648	0.238005	0.532012	PD.iRBD.Ctrl	Anova
Bifidobacterium	2	1.61277	0.204526	0.532012	PD.iRBD.Ctrl	Anova
Bifidobacterium.adolescentis	2	0.0546012	0.946891	0.946891	PD.iRBD.Ctrl	Anova
Bifidobacterium.longum	2	2.63648	0.0766374	0.32358	PD.iRBD.Ctrl	Anova
Blautia	2	1.27822	0.283089	0.614708	PD.iRBD.Ctrl	Anova
Clostridia	2	0.907175	0.406992	0.642605	PD.iRBD.Ctrl	Anova
Clostridiales	2	2.21267	0.114791	0.39655	PD.iRBD.Ctrl	Anova
Clostridium	2	0.49035	0.613892	0.752512	PD.iRBD.Ctrl	Anova
Collinsella	2	4.29178	0.0163125	0.24795	PD.iRBD.Ctrl	Anova
Coprococcus.catus	2	0.687663	0.505135	0.6619	PD.iRBD.Ctrl	Anova
Coprococcus.comes	2	0.695457	0.501267	0.6619	PD.iRBD.Ctrl	Anova
Coriobacteriales	2	2.40583	0.0954461	0.36279	PD.iRBD.Ctrl	Anova
Coriobacteriia	2	5.06516	0.00804715	0.203861	PD.iRBD.Ctrl	Anova
Dorea	2	0.0738966	0.928819	0.946891	PD.iRBD.Ctrl	Anova
Dorea.longicatena	2	0.28492	0.752689	0.829049	PD.iRBD.Ctrl	Anova
Eggerthellaceae	2	0.805726	0.449671	0.657212	PD.iRBD.Ctrl	Anova
Eubacterium	2	0.65745	0.520418	0.670369	PD.iRBD.Ctrl	Anova
Faecalibacterium	2	0.562298	0.571707	0.724163	PD.iRBD.Ctrl	Anova
Firmicutes	2	0.419576	0.658489	0.769926	PD.iRBD.Ctrl	Anova
Lachnospiraceae	2	1.56301	0.21463	0.532012	PD.iRBD.Ctrl	Anova
Lactobacillales	2	0.314771	0.730684	0.825533	PD.iRBD.Ctrl	Anova
Odoribacter.splanchnicus	2	1.56647	0.213911	0.532012	PD.iRBD.Ctrl	Anova
Oscillospiraceae	2	3.33227	0.0397596	0.288435	PD.iRBD.Ctrl	Anova
Proteobacteria	2	1.70041	0.187898	0.528898	PD.iRBD.Ctrl	Anova
Roseburia	2	4.59812	0.0123152	0.233988	PD.iRBD.Ctrl	Anova
Roseburia.faecis	2	3.26927	0.0421786	0.288435	PD.iRBD.Ctrl	Anova
Roseburia.intestinalis	2	0.108802	0.897015	0.933878	PD.iRBD.Ctrl	Anova
Roseburia.inulinivorans	2	1.01065	0.367708	0.633538	PD.iRBD.Ctrl	Anova
Ruminococcaceae	2	2.74458	0.0691695	0.32358	PD.iRBD.Ctrl	Anova
Ruminococcus	2	3.23892	0.0433971	0.288435	PD.iRBD.Ctrl	Anova
Ruminococcus.lactaris	2	2.38498	0.0973637	0.36279	PD.iRBD.Ctrl	Anova
Ruminococcus.sp_AF31.8BH	2	0.729798	0.484581	0.6619	PD.iRBD.Ctrl	Anova
Streptococcus	2	1.08657	0.34136	0.633538	PD.iRBD.Ctrl	Anova
Terrabacteria.group	2	3.57041	0.0318245	0.288435	PD.iRBD.Ctrl	Anova
Eubacterium_hallii	2	0.740548	0.479475	0.6619	PD.iRBD.Ctrl	Anova
unclassified.Firmicutes.sensu.stricto	2	0.173765	0.84075	0.899958	PD.iRBD.Ctrl	Anova
Alistipes.putredinis.DSM.17216	2	1.08659	0.341352	0.633538	PD.iRBD.Ctrl	Anova
Bacteroides.caccae	2	0.836286	0.436355	0.650254	PD.iRBD.Ctrl	Anova
Bilophila	2	0.131478	0.876951	0.925671	PD.iRBD.Ctrl	Anova
Coprococcus	2	0.229081	0.795685	0.863886	PD.iRBD.Ctrl	Anova
Coriobacteriaceae	2	1.00952	0.368113	0.633538	PD.iRBD.Ctrl	Anova
Faecalibacterium.prausnitzii	2	3.02372	0.0531327	0.288435	PD.iRBD.Ctrl	Anova
Gemmiger.formicilis	2	2.15298	0.121544	0.401625	PD.iRBD.Ctrl	Anova
Lactobacillus	2	7.9488	0.000628855	0.0477929	PD.iRBD.Ctrl	Anova
Methanobrevibacter	2	2.35442	0.100245	0.36279	PD.iRBD.Ctrl	Anova
Parabacteroides	2	2.68248	0.0733639	0.32358	PD.iRBD.Ctrl	Anova
Roseburia.hominis	2	0.303881	0.738635	0.825533	PD.iRBD.Ctrl	Anova
Ruminococcus.sp_AM42.11	2	1.05793	0.351067	0.633538	PD.iRBD.Ctrl	Anova
Saccharomycetaceae	2	0.889027	0.414311	0.642605	PD.iRBD.Ctrl	Anova
Subdoligranulum	2	0.943221	0.392842	0.635235	PD.iRBD.Ctrl	Anova
Subdoligranulum.sp_APC924.74	2	1.71258	0.1857	0.528898	PD.iRBD.Ctrl	Anova
Eubacterium_eligens	2	1.09512	0.338516	0.633538	PD.iRBD.Ctrl	Anova
unclassified.Ruminococcaceae	2	2.75511	0.0684828	0.32358	PD.iRBD.Ctrl	Anova
Bacteroides.stercoris	2	2.00257	0.140419	0.426873	PD.iRBD.Ctrl	Anova
Blautia.obeum	2	0.390089	0.678032	0.780764	PD.iRBD.Ctrl	Anova
Butyricicoccus	2	3.30934	0.0406232	0.288435	PD.iRBD.Ctrl	Anova
Eubacterium.ramulus	2	0.431671	0.650639	0.769926	PD.iRBD.Ctrl	Anova
Parabacteroides.merdae	2	1.48947	0.230502	0.532012	PD.iRBD.Ctrl	Anova
Prevotella	2	4.00562	0.0212417	0.269061	PD.iRBD.Ctrl	Anova
Prevotella.copri	2	6.77936	0.0017405	0.066139	PD.iRBD.Ctrl	Anova
Ruminococcus.sp_AF21.42	2	3.02569	0.0530338	0.288435	PD.iRBD.Ctrl	Anova
Eubacterium_rectale	2	1.22951	0.296862	0.622259	PD.iRBD.Ctrl	Anova
Eubacterium_siraeum	2	0.853156	0.429176	0.650254	PD.iRBD.Ctrl	Anova
Akkermansia.muciniphila	2	0.742576	0.478518	0.6619	PD.iRBD.Ctrl	Anova
Lachnospira.pectinoschiza	2	0.990282	0.375121	0.633538	PD.iRBD.Ctrl	Anova
Streptococcaceae	2	1.471	0.234672	0.532012	PD.iRBD.Ctrl	Anova
Bifidobacteriaceae	2	0.524142	0.593697	0.739688	PD.iRBD.Ctrl	Anova
Odoribacteraceae	2	0.466071	0.628832	0.758591	PD.iRBD.Ctrl	Anova
Actinobacteria	73.854	-2.27552	0.0257763	0.3918	PD.Ctrl	t
Alistipes	79.8318	-0.49727	0.620365	0.889196	PD.Ctrl	t
Bacilli	79.9063	-1.31465	0.192388	0.721447	PD.Ctrl	t
Bacteria	79.8347	0.173153	0.86297	0.910912	PD.Ctrl	t
Bacteroidaceae	78.766	0.80275	0.424535	0.827299	PD.Ctrl	t
Bacteroidales	68.6215	1.0869	0.280884	0.721447	PD.Ctrl	t
Bacteroides	79.6916	-0.274802	0.78418	0.910521	PD.Ctrl	t
Bacteroides.vulgatus	79.9442	0.264544	0.792042	0.910521	PD.Ctrl	t
Bacteroidetes	74.7885	-1.33114	0.187185	0.721447	PD.Ctrl	t
Bifidobacterium	74.8164	-2.13228	0.0362657	0.393742	PD.Ctrl	t
Bifidobacterium.adolescentis	79.5332	0.0655074	0.947934	0.960729	PD.Ctrl	t
Bifidobacterium.longum	79.9667	-1.72502	0.0883874	0.721447	PD.Ctrl	t
Blautia	67.1752	1.57841	0.119169	0.721447	PD.Ctrl	t
Clostridia	75.3188	-1.54954	0.125443	0.721447	PD.Ctrl	t
Clostridiales	60.2855	1.12027	0.267043	0.721447	PD.Ctrl	t
Clostridium	67.6596	0.950508	0.345237	0.766166	PD.Ctrl	t
Collinsella	65.5453	0.246198	0.806299	0.910521	PD.Ctrl	t
Coprococcus.catus	79.9254	-0.224077	0.823269	0.910521	PD.Ctrl	t
Coprococcus.comes	79.9998	-0.561298	0.576163	0.889196	PD.Ctrl	t
Coriobacteriales	75.4513	1.27786	0.205217	0.721447	PD.Ctrl	t
Coriobacteriia	63.4339	-3.5256	0.000790622	0.0600873	PD.Ctrl	t
Dorea	76.8985	0.20308	0.839609	0.910521	PD.Ctrl	t
Dorea.longicatena	79.2666	-0.34189	0.733338	0.910521	PD.Ctrl	t
Eggerthellaceae	79.9077	-0.621627	0.535957	0.886901	PD.Ctrl	t
Eubacterium	77.8272	0.475237	0.635949	0.889196	PD.Ctrl	t
Faecalibacterium	79.229	0.478518	0.633599	0.889196	PD.Ctrl	t
Firmicutes	76.6541	0.392489	0.695786	0.910521	PD.Ctrl	t
Lachnospiraceae	75.1392	-0.0516972	0.958907	0.960729	PD.Ctrl	t
Lactobacillales	78.6209	-0.236937	0.813322	0.910521	PD.Ctrl	t
Odoribacter.splanchnicus	79.9164	-1.09773	0.27562	0.721447	PD.Ctrl	t
Oscillospiraceae	79.9549	-2.13829	0.0355459	0.393742	PD.Ctrl	t
Proteobacteria	79.8969	-1.1606	0.249261	0.721447	PD.Ctrl	t
Roseburia	47.4043	2.65412	0.0107904	0.234912	PD.Ctrl	t
Roseburia.faecis	79.9145	2.65016	0.00969554	0.234912	PD.Ctrl	t
Roseburia.intestinalis	79.0388	0.599548	0.550522	0.886901	PD.Ctrl	t
Roseburia.inulinivorans	78.5247	0.198048	0.84352	0.910521	PD.Ctrl	t
Ruminococcaceae	47.8562	1.62416	0.11091	0.721447	PD.Ctrl	t
Ruminococcus	53.8909	1.7441	0.0868443	0.721447	PD.Ctrl	t
Ruminococcus.lactaris	79.5147	0.718206	0.474735	0.886901	PD.Ctrl	t
Ruminococcus.sp_AF31.8BH	79.9581	1.11656	0.267527	0.721447	PD.Ctrl	t
Streptococcus	78.4211	-0.880885	0.381072	0.766166	PD.Ctrl	t
Terrabacteria.group	79.2929	0.0582255	0.953715	0.960729	PD.Ctrl	t
Eubacterium_hallii	75.1691	1.04971	0.297212	0.72865	PD.Ctrl	t
unclassified.Firmicutes.sensu.stricto	78.4361	-0.639543	0.524334	0.886901	PD.Ctrl	t
Alistipes.putredinis.DSM.17216	76.3663	1.29317	0.19985	0.721447	PD.Ctrl	t
Bacteroides.caccae	79.9263	-1.28772	0.20156	0.721447	PD.Ctrl	t
Bilophila	78.4071	0.524171	0.601638	0.889196	PD.Ctrl	t
Coprococcus	79.422	-0.464589	0.643497	0.889196	PD.Ctrl	t
Coriobacteriaceae	79.1369	-1.24835	0.215582	0.721447	PD.Ctrl	t
Faecalibacterium.prausnitzii	79.923	0.263387	0.79293	0.910521	PD.Ctrl	t
Gemmiger.formicilis	78.2856	0.965759	0.337139	0.766166	PD.Ctrl	t
Lactobacillus	78.0836	-2.56102	0.0123638	0.234912	PD.Ctrl	t
Methanobrevibacter	78.7398	-1.49701	0.138388	0.721447	PD.Ctrl	t
Parabacteroides	79.7025	-1.22649	0.223626	0.721447	PD.Ctrl	t
Roseburia.hominis	77.6076	1.07708	0.284782	0.721447	PD.Ctrl	t
Ruminococcus.sp_AM42.11	76.6144	-0.0493997	0.960729	0.960729	PD.Ctrl	t
Saccharomycetaceae	79.5331	0.479292	0.633046	0.889196	PD.Ctrl	t
Subdoligranulum	79.6388	0.877077	0.383083	0.766166	PD.Ctrl	t
Subdoligranulum.sp_APC924.74	72.769	0.603491	0.548059	0.886901	PD.Ctrl	t
Eubacterium_eligens	79.9079	-0.71163	0.478766	0.886901	PD.Ctrl	t
unclassified.Ruminococcaceae	79.998	0.248172	0.804638	0.910521	PD.Ctrl	t
Bacteroides.stercoris	77.5126	-1.38194	0.17096	0.721447	PD.Ctrl	t
Blautia.obeum	79.8112	-0.585075	0.560148	0.886901	PD.Ctrl	t
Butyricicoccus	79.9655	0.992562	0.323917	0.766166	PD.Ctrl	t
Eubacterium.ramulus	79.926	0.250615	0.802755	0.910521	PD.Ctrl	t
Parabacteroides.merdae	79.6579	-0.687801	0.493576	0.886901	PD.Ctrl	t
Prevotella	79.38	0.670405	0.504546	0.886901	PD.Ctrl	t
Prevotella.copri	79.2611	0.385164	0.701148	0.910521	PD.Ctrl	t
Ruminococcus.sp_AF21.42	79.8351	1.47898	0.14308	0.721447	PD.Ctrl	t
Eubacterium_rectale	77.858	0.91729	0.361824	0.766166	PD.Ctrl	t
Eubacterium_siraeum	78.7599	-0.18895	0.850618	0.910521	PD.Ctrl	t
Akkermansia.muciniphila	77.7952	-0.372042	0.710873	0.910521	PD.Ctrl	t
Lachnospira.pectinoschiza	79.46	-0.900471	0.370591	0.766166	PD.Ctrl	t
Streptococcaceae	77.8524	-1.50646	0.135995	0.721447	PD.Ctrl	t
Bifidobacteriaceae	77.7691	-1.16933	0.245843	0.721447	PD.Ctrl	t
Odoribacteraceae	79.0246	-0.294833	0.768895	0.910521	PD.Ctrl	t
Actinobacteria	44.0889	-0.497773	0.621118	0.749285	iRBD.Ctrl	t
Alistipes	53.9972	-0.667835	0.507083	0.734341	iRBD.Ctrl	t
Bacilli	40.1021	-0.202292	0.840711	0.870717	iRBD.Ctrl	t
Bacteria	31.6954	0.178765	0.85926	0.870717	iRBD.Ctrl	t
Bacteroidaceae	40.761	-0.404579	0.687902	0.809633	iRBD.Ctrl	t
Bacteroidales	44.2154	-0.612242	0.543514	0.734341	iRBD.Ctrl	t
Bacteroides	56.7933	-2.27351	0.0267954	0.407289	iRBD.Ctrl	t
Bacteroides.vulgatus	47.367	1.87552	0.0668922	0.423651	iRBD.Ctrl	t
Bacteroidetes	48.1482	-0.899242	0.372999	0.734341	iRBD.Ctrl	t
Bifidobacterium	42.5717	-0.762267	0.450103	0.734341	iRBD.Ctrl	t
Bifidobacterium.adolescentis	40.9955	-0.333178	0.740698	0.816137	iRBD.Ctrl	t
Bifidobacterium.longum	46.6419	-1.78005	0.0815831	0.44288	iRBD.Ctrl	t
Blautia	33.8057	-0.211769	0.833559	0.870717	iRBD.Ctrl	t
Clostridia	45.838	-0.693854	0.491275	0.734341	iRBD.Ctrl	t
Clostridiales	35.0905	-1.15088	0.257564	0.663461	iRBD.Ctrl	t
Clostridium	33.9042	0.500452	0.61999	0.749285	iRBD.Ctrl	t
Collinsella	24.4716	2.0129	0.0552514	0.41991	iRBD.Ctrl	t
Coprococcus.catus	37.8871	0.747057	0.45964	0.734341	iRBD.Ctrl	t
Coprococcus.comes	41.0165	0.608463	0.546236	0.734341	iRBD.Ctrl	t
Coriobacteriales	34.2729	1.90764	0.064846	0.423651	iRBD.Ctrl	t
Coriobacteriia	42.6743	-0.398226	0.692449	0.809633	iRBD.Ctrl	t
Dorea	33.9133	0.552494	0.584233	0.740029	iRBD.Ctrl	t
Dorea.longicatena	36.6307	0.605885	0.548328	0.734341	iRBD.Ctrl	t
Eggerthellaceae	40.3293	-0.911995	0.367191	0.734341	iRBD.Ctrl	t
Eubacterium	31.8689	1.26964	0.213408	0.636252	iRBD.Ctrl	t
Faecalibacterium	32.9706	0.735821	0.467043	0.734341	iRBD.Ctrl	t
Firmicutes	37.4181	-0.711624	0.481111	0.734341	iRBD.Ctrl	t
Lachnospiraceae	51.2508	-1.77912	0.0811512	0.44288	iRBD.Ctrl	t
Lactobacillales	41.5733	0.74668	0.459459	0.734341	iRBD.Ctrl	t
Odoribacter.splanchnicus	45.9768	-1.24651	0.218889	0.636252	iRBD.Ctrl	t
Oscillospiraceae	41.8767	-1.71378	0.0939638	0.446328	iRBD.Ctrl	t
Proteobacteria	44.439	0.572184	0.570081	0.734341	iRBD.Ctrl	t
Roseburia	35.1116	0.343781	0.733061	0.816137	iRBD.Ctrl	t
Roseburia.faecis	38.7007	1.53332	0.133332	0.482535	iRBD.Ctrl	t
Roseburia.intestinalis	39.3376	0.208753	0.835719	0.870717	iRBD.Ctrl	t
Roseburia.inulinivorans	40.8225	0.844348	0.403396	0.734341	iRBD.Ctrl	t
Ruminococcaceae	32.1191	0.587048	0.561276	0.734341	iRBD.Ctrl	t
Ruminococcus	52.347	-1.5585	0.125142	0.482535	iRBD.Ctrl	t
Ruminococcus.lactaris	46.3982	2.37095	0.0219498	0.407289	iRBD.Ctrl	t
Ruminococcus.sp_AF31.8BH	41.968	0.514224	0.609793	0.749285	iRBD.Ctrl	t
Streptococcus	45.2261	-1.48169	0.145358	0.502145	iRBD.Ctrl	t
Terrabacteria.group	22.2732	1.42448	0.168168	0.555686	iRBD.Ctrl	t
Eubacterium_hallii	41.8767	-0.186625	0.852856	0.870717	iRBD.Ctrl	t
unclassified.Firmicutes.sensu.stricto	51.9044	-0.62724	0.533252	0.734341	iRBD.Ctrl	t
Alistipes.putredinis.DSM.17216	43.5458	-0.357693	0.722301	0.816137	iRBD.Ctrl	t
Bacteroides.caccae	39.9468	-0.572736	0.570033	0.734341	iRBD.Ctrl	t
Bilophila	43.085	-0.0743163	0.941103	0.941103	iRBD.Ctrl	t
Coprococcus	40.2271	-0.642547	0.524163	0.734341	iRBD.Ctrl	t
Coriobacteriaceae	39.9015	-0.728833	0.47036	0.734341	iRBD.Ctrl	t
Faecalibacterium.prausnitzii	31.2247	1.55379	0.130313	0.482535	iRBD.Ctrl	t
Gemmiger.formicilis	35.4736	1.28623	0.206694	0.636252	iRBD.Ctrl	t
Lactobacillus	48.5068	1.73173	0.089678	0.446328	iRBD.Ctrl	t
Methanobrevibacter	38.9815	-1.57494	0.123353	0.482535	iRBD.Ctrl	t
Parabacteroides	51.0216	-2.14657	0.0366047	0.41991	iRBD.Ctrl	t
Roseburia.hominis	36.6336	0.583188	0.56334	0.734341	iRBD.Ctrl	t
Ruminococcus.sp_AM42.11	27.6597	1.17497	0.250023	0.663461	iRBD.Ctrl	t
Saccharomycetaceae	44.6216	0.957753	0.343348	0.734341	iRBD.Ctrl	t
Subdoligranulum	41.8404	0.902091	0.372172	0.734341	iRBD.Ctrl	t
Subdoligranulum.sp_APC924.74	28.954	1.23697	0.226037	0.636252	iRBD.Ctrl	t
Eubacterium_eligens	41.8674	0.74983	0.45755	0.734341	iRBD.Ctrl	t
unclassified.Ruminococcaceae	55.8217	2.39826	0.0198408	0.407289	iRBD.Ctrl	t
Bacteroides.stercoris	34.2957	-2.02059	0.0511859	0.41991	iRBD.Ctrl	t
Blautia.obeum	37.8096	0.26205	0.794705	0.862823	iRBD.Ctrl	t
Butyricicoccus	56.0146	2.78513	0.00728656	0.276889	iRBD.Ctrl	t
Eubacterium.ramulus	43.0686	0.663881	0.510305	0.734341	iRBD.Ctrl	t
Parabacteroides.merdae	43.6677	-1.58373	0.120472	0.482535	iRBD.Ctrl	t
Prevotella	43.7486	2.11703	0.0399798	0.41991	iRBD.Ctrl	t
Prevotella.copri	56.9205	3.6476	0.000575451	0.0437343	iRBD.Ctrl	t
Ruminococcus.sp_AF21.42	49.5124	2.05894	0.04478	0.41991	iRBD.Ctrl	t
Eubacterium_rectale	36.8558	1.00402	0.321914	0.734341	iRBD.Ctrl	t
Eubacterium_siraeum	43.8199	-1.11672	0.2702	0.663461	iRBD.Ctrl	t
Akkermansia.muciniphila	37.2908	-0.958791	0.34384	0.734341	iRBD.Ctrl	t
Lachnospira.pectinoschiza	40.914	-1.11674	0.270622	0.663461	iRBD.Ctrl	t
Streptococcaceae	40.074	-0.332872	0.740966	0.816137	iRBD.Ctrl	t
Bifidobacteriaceae	39.7707	-0.617547	0.540394	0.734341	iRBD.Ctrl	t
Odoribacteraceae	39.5553	-0.811743	0.421797	0.734341	iRBD.Ctrl	t
Actinobacteria	33.5828	-1.30329	0.201341	0.695541	PD.iRBD	t
Alistipes	50.553	0.204038	0.839143	0.898238	PD.iRBD	t
Bacilli	40.2222	-0.837869	0.407056	0.773406	PD.iRBD	t
Bacteria	30.2509	-0.0742907	0.941268	0.958413	PD.iRBD	t
Bacteroidaceae	44.2013	1.04469	0.301847	0.773406	PD.iRBD	t
Bacteroidales	57.8644	1.48605	0.142695	0.658023	PD.iRBD	t
Bacteroides	56.7867	1.94982	0.0561409	0.603994	PD.iRBD	t
Bacteroides.vulgatus	44.9369	-1.67828	0.100234	0.634815	PD.iRBD	t
Bacteroidetes	37.0818	-0.176085	0.861185	0.902642	PD.iRBD	t
Bifidobacterium	33.2934	-0.858889	0.396543	0.773406	PD.iRBD	t
Bifidobacterium.adolescentis	42.6261	0.380584	0.705402	0.865902	PD.iRBD	t
Bifidobacterium.longum	44.4865	0.295588	0.76892	0.865902	PD.iRBD	t
Blautia	48.385	1.39641	0.168964	0.658023	PD.iRBD	t
Clostridia	35.8837	-0.550318	0.585511	0.865902	PD.iRBD	t
Clostridiales	56.3103	1.83676	0.0715256	0.603994	PD.iRBD	t
Clostridium	48.0764	0.291836	0.771667	0.865902	PD.iRBD	t
Collinsella	30.0954	-1.78069	0.0850603	0.634815	PD.iRBD	t
Coprococcus.catus	36.0831	-0.925273	0.360971	0.773406	PD.iRBD	t
Coprococcus.comes	39.881	-1.0625	0.2944	0.773406	PD.iRBD	t
Coriobacteriales	41.015	-0.858701	0.395496	0.773406	PD.iRBD	t
Coriobacteriia	27.7705	-2.24403	0.0329891	0.421194	PD.iRBD	t
Dorea	38.9597	-0.382232	0.704366	0.865902	PD.iRBD	t
Dorea.longicatena	38.7093	-0.848123	0.401584	0.773406	PD.iRBD	t
Eggerthellaceae	40.4375	0.415679	0.679842	0.865902	PD.iRBD	t
Eubacterium	35.2969	-0.9143	0.366763	0.773406	PD.iRBD	t
Faecalibacterium	34.7433	-0.401269	0.690679	0.865902	PD.iRBD	t
Firmicutes	43.6444	0.976132	0.334378	0.773406	PD.iRBD	t
Lachnospiraceae	57.9691	1.53278	0.13077	0.658023	PD.iRBD	t
Lactobacillales	45.3422	-0.914702	0.365187	0.773406	PD.iRBD	t
Odoribacter.splanchnicus	43.4143	0.320228	0.750332	0.865902	PD.iRBD	t
Oscillospiraceae	39.9343	0.00937511	0.992567	0.992567	PD.iRBD	t
Proteobacteria	44.5281	-1.56133	0.125525	0.658023	PD.iRBD	t
Roseburia	57.4112	2.22468	0.0300484	0.421194	PD.iRBD	t
Roseburia.faecis	38.7882	0.505823	0.615844	0.865902	PD.iRBD	t
Roseburia.intestinalis	42.1226	0.270962	0.787744	0.865902	PD.iRBD	t
Roseburia.inulinivorans	44.7242	-0.650327	0.518808	0.865902	PD.iRBD	t
Ruminococcaceae	59.5385	1.06106	0.292947	0.773406	PD.iRBD	t
Ruminococcus	53.865	2.63883	0.0108556	0.275009	PD.iRBD	t
Ruminococcus.lactaris	48.067	-1.68556	0.0983626	0.634815	PD.iRBD	t
Ruminococcus.sp_AF31.8BH	40.0482	0.38359	0.703311	0.865902	PD.iRBD	t
Streptococcus	49.4266	0.641116	0.524409	0.865902	PD.iRBD	t
Terrabacteria.group	22.4638	-1.40683	0.173164	0.658023	PD.iRBD	t
Eubacterium_hallii	50.4976	1.06213	0.293228	0.773406	PD.iRBD	t
unclassified.Firmicutes.sensu.stricto	44.7459	0.0683618	0.945802	0.958413	PD.iRBD	t
Alistipes.putredinis.DSM.17216	50.776	1.44988	0.153241	0.658023	PD.iRBD	t
Bacteroides.caccae	39.9375	-0.442621	0.660428	0.865902	PD.iRBD	t
Bilophila	47.3108	0.516251	0.608084	0.865902	PD.iRBD	t
Coprococcus	42.1521	0.258158	0.797541	0.865902	PD.iRBD	t
Coriobacteriaceae	42.5101	-0.286581	0.775825	0.865902	PD.iRBD	t
Faecalibacterium.prausnitzii	30.1033	-1.40959	0.168908	0.658023	PD.iRBD	t
Gemmiger.formicilis	39.1087	-0.535491	0.595343	0.865902	PD.iRBD	t
Lactobacillus	53.0206	-3.98418	0.000207908	0.015801	PD.iRBD	t
Methanobrevibacter	42.3312	0.345103	0.731726	0.865902	PD.iRBD	t
Parabacteroides	47.0466	1.0788	0.286176	0.773406	PD.iRBD	t
Roseburia.hominis	41.4477	0.259509	0.796528	0.865902	PD.iRBD	t
Ruminococcus.sp_AM42.11	30.6752	-1.16826	0.251701	0.773406	PD.iRBD	t
Saccharomycetaceae	46.2731	-0.526339	0.601166	0.865902	PD.iRBD	t
Subdoligranulum	43.1421	-0.168456	0.867012	0.902642	PD.iRBD	t
Subdoligranulum.sp_APC924.74	35.2984	-0.788613	0.435603	0.807459	PD.iRBD	t
Eubacterium_eligens	41.9462	-1.3293	0.190934	0.690999	PD.iRBD	t
unclassified.Ruminococcaceae	53.8519	-2.1851	0.0332521	0.421194	PD.iRBD	t
Bacteroides.stercoris	38.7194	0.948558	0.348729	0.773406	PD.iRBD	t
Blautia.obeum	35.5027	-0.700372	0.488259	0.86297	PD.iRBD	t
Butyricicoccus	53.4965	-1.84961	0.0698966	0.603994	PD.iRBD	t
Eubacterium.ramulus	42.9904	-0.453519	0.652456	0.865902	PD.iRBD	t
Parabacteroides.merdae	44.9008	0.977834	0.333396	0.773406	PD.iRBD	t
Prevotella	45.8622	-1.49727	0.141175	0.658023	PD.iRBD	t
Prevotella.copri	57.7343	-3.11755	0.00284208	0.107999	PD.iRBD	t
Ruminococcus.sp_AF21.42	46.2212	-0.764795	0.448281	0.811175	PD.iRBD	t
Eubacterium_rectale	41.3587	-0.264814	0.792468	0.865902	PD.iRBD	t
Eubacterium_siraeum	47.3851	0.912873	0.365931	0.773406	PD.iRBD	t
Akkermansia.muciniphila	41.9592	0.63161	0.531068	0.865902	PD.iRBD	t
Lachnospira.pectinoschiza	42.7571	0.365875	0.716263	0.865902	PD.iRBD	t
Streptococcaceae	45.0379	-0.904422	0.370584	0.773406	PD.iRBD	t
Bifidobacteriaceae	44.8297	-0.355728	0.723713	0.865902	PD.iRBD	t
Odoribacteraceae	42.386	0.555244	0.581647	0.865902	PD.iRBD	t

## Sheet: STable7
Supplementary Table 7. Differential abundance of functionally classified (KEGG orthologs; KOs) MG and MT sequence reads, compared with DESeq2, corrected for age and sex.
Contrasts include the two-category case (PD or iRBD) vs control variable, and pairwise contrasts for the three-group variable (PD/Ctrl, iRBD/Ctrl, PD/iRBD).
KO	baseMean	log2FoldChange	lfcSE	stat	pvalue	padj	Contrast	Data
K07308	507.079	0.34109	0.256166	1.33152	0.183019	0.547098	Case/Ctrl	MG
K05602	33.398	0.266775	0.36985	0.721306	0.470721	0.78789	Case/Ctrl	MG
K14986	87.932	0.154405	0.239066	0.645866	0.518366	0.813836	Case/Ctrl	MG
K10242	11.602	0.254231	0.474835	0.53541	0.592367	0.85507	Case/Ctrl	MG
K10450	147.445	-0.460832	0.47731	-0.965478	0.334306	0.688872	Case/Ctrl	MG
K09952	8167.11	0.0157851	0.11154	0.14152	0.887459	0.967354	Case/Ctrl	MG
K00839	446.098	0.404118	0.184342	2.19221	0.0283641	0.247087	Case/Ctrl	MG
K04813	32.3606	0.325472	0.391242	0.831894	0.405469	0.739405	Case/Ctrl	MG
K02048	2184.07	0.0206687	0.125553	0.164621	0.869242	0.96566	Case/Ctrl	MG
K03006	25.6003	-1.27346	0.875152	-1.45513	#N/A	#N/A	Case/Ctrl	MG
K02600	10582.2	-0.0231955	0.0676618	-0.342815	0.731738	0.912402	Case/Ctrl	MG
K07645	516.749	0.232444	0.189492	1.22667	0.219947	0.584454	Case/Ctrl	MG
K06978	1803.86	-0.0235743	0.119534	-0.197218	0.843657	0.95859	Case/Ctrl	MG
K01613	3316.9	-0.063494	0.0628307	-1.01056	0.312229	0.670042	Case/Ctrl	MG
K01276	823.342	0.191746	0.211066	0.908467	0.363632	0.713486	Case/Ctrl	MG
K00031	6887.36	-0.0561706	0.0292062	-1.92325	0.0544493	0.318464	Case/Ctrl	MG
K10421	4201.05	0.123325	0.175824	0.701409	0.483048	0.795469	Case/Ctrl	MG
K02588	1652.63	-0.141335	0.108861	-1.2983	0.194184	0.562257	Case/Ctrl	MG
K01530	46.4857	-1.08469	0.844758	-1.28402	0.199134	0.568052	Case/Ctrl	MG
K03752	766.898	-0.201851	0.110649	-1.82425	0.0681139	0.345809	Case/Ctrl	MG
K01744	3898.39	-0.0471622	0.0884832	-0.533007	0.594029	0.855767	Case/Ctrl	MG
K09739	16.7106	0.817401	0.841888	0.970915	0.331591	0.68643	Case/Ctrl	MG
K00441	8004.32	-0.0218469	0.121011	-0.180537	0.856731	0.962215	Case/Ctrl	MG
K05880	347.701	0.201163	0.268141	0.750211	0.453128	0.777055	Case/Ctrl	MG
K03584	7214.72	-0.0223844	0.069617	-0.321536	0.747804	0.918592	Case/Ctrl	MG
K13017	1744.82	-0.246179	0.132275	-1.86112	0.0627268	0.333525	Case/Ctrl	MG
K08055	333.786	0.258009	0.535045	0.482219	0.62965	0.87362	Case/Ctrl	MG
K00194	875.131	-0.0571643	0.116094	-0.492395	0.62244	0.868322	Case/Ctrl	MG
K09699	128.308	0.326956	0.514988	0.634882	0.525505	0.818455	Case/Ctrl	MG
K00386	135.262	0.206107	0.244385	0.843372	0.399021	0.735578	Case/Ctrl	MG
K07171	10069.3	0.0244904	0.0696501	0.35162	0.725124	0.910564	Case/Ctrl	MG
K07178	32.1586	0.554385	0.765447	0.724263	0.468904	0.78701	Case/Ctrl	MG
K04771	1563.02	-0.0648657	0.15944	-0.406834	0.68413	0.893417	Case/Ctrl	MG
K15332	31.6438	-0.0241592	0.337133	-0.0716607	0.942872	0.98194	Case/Ctrl	MG
K12086	14.0445	-1.71928	0.787155	-2.18417	0.0289499	0.247087	Case/Ctrl	MG
K01286	84.2433	-0.0519868	0.40935	-0.126998	0.898942	0.970909	Case/Ctrl	MG
K13940	2016.74	-0.0807014	0.106022	-0.761174	0.446553	0.773199	Case/Ctrl	MG
K03346	499.792	0.170581	0.225614	0.756074	0.449605	0.774556	Case/Ctrl	MG
K05635	222.541	-0.77709	0.409722	-1.89663	0.0578772	0.325805	Case/Ctrl	MG
K08280	367.058	-0.128114	0.219263	-0.584292	0.559024	0.836947	Case/Ctrl	MG
K01266	2583.11	0.0205588	0.0649901	0.316337	0.751747	0.920357	Case/Ctrl	MG
K07387	2594.19	0.140282	0.139213	1.00768	0.313609	0.671292	Case/Ctrl	MG
K06285	24.2028	0.141716	0.365977	0.387228	0.698588	0.89997	Case/Ctrl	MG
K12008	11.935	0.978383	0.802103	1.21977	0.222551	0.587766	Case/Ctrl	MG
K08986	4644.92	-0.0913046	0.0623028	-1.4655	0.142785	0.490174	Case/Ctrl	MG
K12212	677.361	0.198147	0.202714	0.977471	0.328336	0.683898	Case/Ctrl	MG
K00341	3106.14	0.0928029	0.128518	0.7221	0.470233	0.787661	Case/Ctrl	MG
K15024	2285.62	0.0618719	0.0823551	0.751283	0.452483	0.776474	Case/Ctrl	MG
K02510	677.694	0.280683	0.163028	1.72169	0.0851259	0.380776	Case/Ctrl	MG
K15971	3969.6	0.0155544	0.097172	0.160071	0.872825	0.967093	Case/Ctrl	MG
K13925	1065.17	0.147874	0.153725	0.961937	0.336081	0.689083	Case/Ctrl	MG
K01165	83.8452	-0.783445	0.739228	-1.05982	0.289228	0.649894	Case/Ctrl	MG
K05081	9.804	-0.306297	0.733096	-0.417812	0.676085	0.89126	Case/Ctrl	MG
K05798	399.777	0.782441	0.364698	2.14545	0.0319171	0.257016	Case/Ctrl	MG
K00883	254.343	0.0300657	0.208502	0.144199	0.885344	0.967279	Case/Ctrl	MG
K04769	4800.62	-0.0190901	0.0810291	-0.235595	0.813747	0.946061	Case/Ctrl	MG
K06940	6977.55	-0.0987458	0.0598909	-1.64876	0.0991965	0.414262	Case/Ctrl	MG
K00849	10897.8	-0.0705745	0.0325837	-2.16595	0.0303151	0.253179	Case/Ctrl	MG
K10004	105.908	0.576522	0.274401	2.10102	0.0356388	0.267172	Case/Ctrl	MG
K02475	406.622	0.156254	0.214885	0.72715	0.467134	0.78701	Case/Ctrl	MG
K02234	10648.8	-0.118764	0.0450665	-2.63531	0.00840601	0.192928	Case/Ctrl	MG
K07432	531.193	0.0315616	0.173354	0.182064	0.855533	0.962111	Case/Ctrl	MG
K00058	15388.9	-0.0121021	0.0361375	-0.334889	0.737709	0.914568	Case/Ctrl	MG
K10800	79.7459	1.0257	0.558663	1.83599	0.0663589	0.341014	Case/Ctrl	MG
K07028	2143.14	0.124816	0.0874108	1.42792	0.153314	0.508179	Case/Ctrl	MG
K07637	193.626	0.584972	0.388289	1.50654	0.131929	0.471895	Case/Ctrl	MG
K00538	2820.3	0.0885423	0.0972265	0.910681	0.362464	0.712522	Case/Ctrl	MG
K01183	4102.57	0.494827	0.168823	2.93104	0.00337831	0.14614	Case/Ctrl	MG
K02634	12.079	0.0285734	0.891089	0.0320657	0.97442	0.99077	Case/Ctrl	MG
K01295	1741.83	-0.0395032	0.0894742	-0.441504	0.658848	0.883988	Case/Ctrl	MG
K12112	1013.51	0.0947324	0.133819	0.707915	0.478998	0.793204	Case/Ctrl	MG
K01663	15.8742	-0.0730846	0.803845	-0.0909188	0.927557	0.977445	Case/Ctrl	MG
K13767	7.88272	-0.0347665	0.718902	-0.0483606	0.961429	#N/A	Case/Ctrl	MG
K15289	21.7585	0.632631	0.54527	1.16022	0.245961	0.613129	Case/Ctrl	MG
K08001	8.49424	-0.0146985	0.819383	-0.0179385	0.985688	0.995376	Case/Ctrl	MG
K14096	10.4942	0.9812	0.819049	1.19798	0.230927	0.59586	Case/Ctrl	MG
K14940	34.2464	-1.74091	1.00369	-1.73452	0.0828266	0.37397	Case/Ctrl	MG
K00696	30.1975	0.453343	0.646032	0.701735	0.482845	0.795329	Case/Ctrl	MG
K14394	4602.91	-0.0736457	0.0336866	-2.1862	0.0288009	0.247087	Case/Ctrl	MG
K04102	9.98136	-1.27797	0.920875	-1.38778	0.165204	0.527449	Case/Ctrl	MG
K15833	53.2502	1.74482	0.830241	2.10159	0.0355894	0.267172	Case/Ctrl	MG
K04022	77.0437	1.36413	0.762561	1.78888	0.0736346	0.353625	Case/Ctrl	MG
K00054	133.939	0.670208	0.339614	1.97344	0.0484452	0.300401	Case/Ctrl	MG
K00337	1949.83	0.123153	0.125921	0.978012	0.328068	0.683612	Case/Ctrl	MG
K11068	5365.77	0.0552009	0.0461363	1.19647	0.231512	0.596253	Case/Ctrl	MG
K13502	50.1592	0.218037	0.679163	0.321037	0.748182	0.918592	Case/Ctrl	MG
K02798	1418.88	0.302329	0.164889	1.83353	0.0667242	0.341847	Case/Ctrl	MG
K02103	3390.07	0.0195475	0.118564	0.164869	0.869047	0.96566	Case/Ctrl	MG
K06033	18.5276	-0.555761	0.836934	-0.664044	0.506662	0.808408	Case/Ctrl	MG
K02763	232.522	0.0702435	0.239763	0.292971	0.769544	0.927348	Case/Ctrl	MG
K11722	47.7323	0.324472	0.770153	0.421308	0.67353	0.890742	Case/Ctrl	MG
K00528	855.789	0.0491322	0.234478	0.209539	0.834028	0.953721	Case/Ctrl	MG
K01669	111.735	0.621945	0.645828	0.963019	0.335538	0.689083	Case/Ctrl	MG
K02747	683.432	0.0741525	0.174202	0.42567	0.670348	0.890246	Case/Ctrl	MG
K03554	101.829	0.73727	0.428645	1.72	0.0854318	0.381637	Case/Ctrl	MG
K10974	3712.07	0.0154145	0.102985	0.149678	0.881019	0.967279	Case/Ctrl	MG
K14081	43.3152	0.209982	0.574702	0.365376	0.714831	0.906446	Case/Ctrl	MG
K10900	1619.67	-0.199226	0.174542	-1.14143	0.253693	0.620363	Case/Ctrl	MG
K09683	52.3771	-0.568136	0.44247	-1.28401	0.199139	0.568052	Case/Ctrl	MG
K00446	16.5759	-0.371604	0.773674	-0.480311	0.631007	0.873881	Case/Ctrl	MG
K13581	2405.13	0.0344538	0.153243	0.224831	0.822111	0.949957	Case/Ctrl	MG
K03548	18512.3	0.0239521	0.0269916	0.887388	0.37487	0.722607	Case/Ctrl	MG
K05786	674.513	0.0164062	0.151626	0.108202	0.913836	0.975569	Case/Ctrl	MG
K13677	387.796	0.0493048	0.146018	0.337663	0.735617	0.914053	Case/Ctrl	MG
K12147	36.138	0.388833	0.787944	0.493478	0.621675	0.868322	Case/Ctrl	MG
K03646	1573.29	-0.122992	0.146549	-0.839253	0.401327	0.736569	Case/Ctrl	MG
K03800	2309.35	0.113515	0.137011	0.828514	0.407379	0.741432	Case/Ctrl	MG
K08115	26.6801	1.11274	0.978209	1.13753	0.255317	0.621498	Case/Ctrl	MG
K02347	42.6953	0.00625507	0.486029	0.0128698	0.989732	0.996243	Case/Ctrl	MG
K04749	891.389	-0.0356321	0.113287	-0.31453	0.753118	0.921604	Case/Ctrl	MG
K02655	232.416	-0.138421	0.30238	-0.457774	0.647115	0.880966	Case/Ctrl	MG
K01191	10154.5	0.387477	0.0931916	4.15785	3.21253e-05	0.0199905	Case/Ctrl	MG
K13695	10276	0.00936032	0.0799781	0.117036	0.906832	0.973978	Case/Ctrl	MG
K01963	5947.49	-0.0818568	0.0723102	-1.13202	0.257625	0.62335	Case/Ctrl	MG
K02809	623.314	-0.26649	0.1964	-1.35687	0.174822	0.539614	Case/Ctrl	MG
K00521	44.7907	0.712212	0.839799	0.848074	0.396397	0.734733	Case/Ctrl	MG
K14414	118.454	1.86168	0.489896	3.80015	0.000144607	0.0389398	Case/Ctrl	MG
K07269	61.6213	1.48201	0.579897	2.55564	0.0105991	0.205629	Case/Ctrl	MG
K12977	76.5545	0.564458	0.897531	0.628901	0.529414	0.821202	Case/Ctrl	MG
K10442	37.1402	0.764438	0.982822	0.777799	0.436688	0.766059	Case/Ctrl	MG
K06174	73.849	0.639054	0.650621	0.98222	0.325991	0.682067	Case/Ctrl	MG
K09920	35.7929	1.75327	0.798683	2.1952	0.0281492	0.247087	Case/Ctrl	MG
K07138	8566.87	-0.00549606	0.0530607	-0.103581	0.917502	0.976606	Case/Ctrl	MG
K08850	16.2863	0.670463	0.94509	0.709417	0.478066	0.792109	Case/Ctrl	MG
K00112	510.025	0.401284	0.221217	1.81398	0.0696804	0.349284	Case/Ctrl	MG
K13794	113.663	0.741348	0.287081	2.58236	0.00981262	0.199573	Case/Ctrl	MG
K09770	594.911	-0.69389	0.203766	-3.40533	0.000660848	0.0787341	Case/Ctrl	MG
K00015	338.763	0.129844	0.172673	0.751966	0.452072	0.776364	Case/Ctrl	MG
K05546	128.876	0.714703	0.39602	1.80471	0.0711196	0.351298	Case/Ctrl	MG
K06154	16.6157	-0.12922	0.587605	-0.219909	0.825942	0.950752	Case/Ctrl	MG
K00568	6034.79	0.015665	0.0683594	0.229156	0.818748	0.948279	Case/Ctrl	MG
K08138	2743.41	0.112728	0.155803	0.723529	0.469355	0.787035	Case/Ctrl	MG
K06608	318.681	-0.294914	0.188222	-1.56684	0.117152	0.447599	Case/Ctrl	MG
K06331	2678.27	-0.16785	0.113804	-1.4749	0.140239	0.485823	Case/Ctrl	MG
K15831	77.6355	0.555129	0.42583	1.30364	0.192357	0.558889	Case/Ctrl	MG
K14548	112.282	-0.109606	0.548283	-0.199907	0.841553	0.957468	Case/Ctrl	MG
K01358	14818	0.028205	0.0296843	0.950167	0.342027	0.69395	Case/Ctrl	MG
K01301	2142.39	-0.0784964	0.128928	-0.60884	0.542631	0.826468	Case/Ctrl	MG
K11788	38.8024	-0.133282	0.29898	-0.445788	0.65575	0.883663	Case/Ctrl	MG
K01869	20359.7	-0.0248451	0.0385715	-0.644133	0.51949	0.814327	Case/Ctrl	MG
K02536	2563.65	0.014332	0.116597	0.12292	0.902171	0.972009	Case/Ctrl	MG
K09568	88.8125	-0.363787	0.338949	-1.07328	0.283146	0.643749	Case/Ctrl	MG
K01133	3631.84	0.375741	0.147931	2.53997	0.0110861	0.209678	Case/Ctrl	MG
K10763	330.694	0.233903	0.242044	0.966368	0.33386	0.688586	Case/Ctrl	MG
K02930	33.2666	0.515827	0.658547	0.78328	0.433462	0.763039	Case/Ctrl	MG
K11742	47.3702	0.00309908	0.392753	0.00789066	0.993704	0.99726	Case/Ctrl	MG
K04034	7878.8	-0.177108	0.0943468	-1.8772	0.0604904	0.331226	Case/Ctrl	MG
K16213	3807.18	0.0593312	0.113377	0.523311	0.600758	0.859576	Case/Ctrl	MG
K13774	15.7227	0.0675252	0.434907	0.155264	0.876613	0.967093	Case/Ctrl	MG
K00737	93.5714	-1.03641	0.356715	-2.90542	0.00366756	0.150549	Case/Ctrl	MG
K00145	8351.51	-0.0216552	0.0290892	-0.74444	0.45661	0.779782	Case/Ctrl	MG
K12472	11.5351	1.27499	0.929591	1.37156	0.1702	0.533669	Case/Ctrl	MG
K06866	50.7282	1.55975	0.491894	3.17092	0.00151959	0.117914	Case/Ctrl	MG
K03785	3298.63	-0.0396652	0.0683917	-0.579971	0.561934	0.837167	Case/Ctrl	MG
K11261	1045.77	0.0758569	0.139838	0.542464	0.587499	0.85372	Case/Ctrl	MG
K01134	4842.6	0.245344	0.153442	1.59894	0.109834	0.434433	Case/Ctrl	MG
K00988	403.999	0.526835	0.2182	2.41446	0.0157585	0.217991	Case/Ctrl	MG
K05944	1571.89	0.243756	0.164673	1.48025	0.138808	0.483125	Case/Ctrl	MG
K08587	2556.04	-0.123315	0.0953684	-1.29304	0.195999	0.563874	Case/Ctrl	MG
K11688	8205.85	-0.102112	0.081732	-1.24936	0.211535	0.575806	Case/Ctrl	MG
K02192	80.9097	0.699539	0.275933	2.53518	0.011239	0.210544	Case/Ctrl	MG
K06992	1972.71	0.0716924	0.0973932	0.736114	0.461662	0.783906	Case/Ctrl	MG
K10794	198.332	-0.253429	0.153314	-1.65301	0.0983296	0.412176	Case/Ctrl	MG
K06164	222.735	0.465553	0.268136	1.73626	0.0825185	0.373079	Case/Ctrl	MG
K06874	24.791	0.399965	0.743778	0.537748	0.590751	0.854734	Case/Ctrl	MG
K01952	26901.7	0.00532378	0.0294783	0.1806	0.856682	0.962215	Case/Ctrl	MG
K01552	2394.43	0.0253568	0.149878	0.169183	0.865653	0.96566	Case/Ctrl	MG
K04082	86.0783	0.530961	0.29295	1.81246	0.0699146	0.349387	Case/Ctrl	MG
K05698	534.332	0.235058	0.273895	0.858206	0.390779	0.731366	Case/Ctrl	MG
K09992	1350.61	0.250197	0.130449	1.91796	0.0551158	0.319157	Case/Ctrl	MG
K07166	2864.29	-0.0739353	0.043712	-1.69142	0.0907571	0.393443	Case/Ctrl	MG
K04796	27.4952	1.03672	0.818134	1.26718	0.205091	0.571233	Case/Ctrl	MG
K06724	14.9169	-0.110937	0.8079	-0.137315	0.890782	0.968642	Case/Ctrl	MG
K06211	365.654	0.605691	0.29088	2.08227	0.0373176	0.273112	Case/Ctrl	MG
K10395	2265.61	0.0461707	0.164678	0.28037	0.779193	0.93044	Case/Ctrl	MG
K12263	390.298	-0.244408	0.158573	-1.54129	0.123246	0.455698	Case/Ctrl	MG
K03056	18.6133	0.548653	0.744263	0.737176	0.461015	0.7838	Case/Ctrl	MG
K01639	2712.07	-0.0748024	0.104172	-0.718065	0.472717	0.788853	Case/Ctrl	MG
K01867	10814	-0.00260314	0.0256769	-0.10138	0.919249	0.977241	Case/Ctrl	MG
K02122	1937.45	0.072264	0.0817319	0.884159	0.37661	0.723415	Case/Ctrl	MG
K00830	1162.43	-0.288883	0.119763	-2.41212	0.0158602	0.217991	Case/Ctrl	MG
K01483	928.236	-0.0482295	0.146145	-0.330012	0.741391	0.915956	Case/Ctrl	MG
K13021	268.864	-0.464238	0.458368	-1.01281	0.311153	0.669227	Case/Ctrl	MG
K03117	821.595	-0.103229	0.139568	-0.73963	0.459525	0.783567	Case/Ctrl	MG
K05814	1046.17	-0.0326318	0.134714	-0.24223	0.808602	0.943952	Case/Ctrl	MG
K09010	50.1969	0.116608	0.330198	0.353146	0.723979	0.909805	Case/Ctrl	MG
K02686	122.61	-0.232028	0.340772	-0.680888	0.495943	0.80199	Case/Ctrl	MG
K01218	2323.23	-0.195789	0.174657	-1.12099	0.262292	0.625343	Case/Ctrl	MG
K10426	9.65499	-0.708401	0.926106	-0.764924	#N/A	#N/A	Case/Ctrl	MG
K01053	5660.25	0.113952	0.164111	0.694357	0.487459	0.79737	Case/Ctrl	MG
K11472	56.1807	1.81806	0.96772	1.87871	0.0602842	0.331226	Case/Ctrl	MG
K15849	66.7285	1.48825	0.3627	4.10325	4.07392e-05	0.0199905	Case/Ctrl	MG
K08496	25.7238	0.478553	0.440417	1.08659	0.277218	0.639556	Case/Ctrl	MG
K08368	379.908	0.865861	0.236983	3.65368	0.000258508	0.0595406	Case/Ctrl	MG
K01730	689.95	-0.285696	0.159048	-1.79629	0.0724483	0.3524	Case/Ctrl	MG
K03423	18453	-0.0744179	0.0356173	-2.08938	0.0366739	0.270523	Case/Ctrl	MG
K00825	1063.46	-0.051228	0.176572	-0.290126	0.77172	0.927923	Case/Ctrl	MG
K09787	3387.26	-0.00033109	0.0633541	-0.00522603	0.99583	0.997926	Case/Ctrl	MG
K10810	168.571	0.168212	0.345537	0.486814	0.62639	0.870712	Case/Ctrl	MG
K01159	4081.92	0.0383747	0.0580437	0.661134	0.508526	0.80945	Case/Ctrl	MG
K00098	49.1881	1.23115	0.444126	2.77207	0.00557016	0.17751	Case/Ctrl	MG
K12296	34.1614	0.166721	0.495214	0.336664	0.73637	0.914165	Case/Ctrl	MG
K01415	10.9555	-1.77442	0.789219	-2.24833	0.0245553	0.241212	Case/Ctrl	MG
K00832	759.087	0.218661	0.18308	1.19434	0.232344	0.597455	Case/Ctrl	MG
K00625	247.236	0.639841	0.245298	2.60843	0.00909595	0.198079	Case/Ctrl	MG
K01858	1864.84	-0.0950214	0.158258	-0.600419	0.548227	0.829212	Case/Ctrl	MG
K02402	34.0366	1.43086	0.778591	1.83775	0.066099	0.340262	Case/Ctrl	MG
K04335	50.6823	1.50293	0.697747	2.15397	0.0312422	0.254628	Case/Ctrl	MG
K06933	2794.59	-0.117816	0.072815	-1.61801	0.10566	0.425676	Case/Ctrl	MG
K10911	18.0969	0.214225	0.883017	0.242606	0.808311	0.943952	Case/Ctrl	MG
K04127	24.7829	0.486628	0.985507	0.493785	0.621458	0.868322	Case/Ctrl	MG
K00837	15.5924	-1.87315	0.68321	-2.74168	0.00611255	0.184528	Case/Ctrl	MG
K06918	76.062	1.60232	0.725026	2.21002	0.0271036	0.2448	Case/Ctrl	MG
K15154	21.7247	-0.325469	0.985259	-0.330339	0.741144	0.915956	Case/Ctrl	MG
K04044	410.968	-0.0376711	0.259557	-0.145136	0.884603	0.967279	Case/Ctrl	MG
K00425	3143.01	0.12766	0.117145	1.08976	0.275817	0.638976	Case/Ctrl	MG
K07658	24185.9	-0.00856329	0.0461226	-0.185664	0.852709	0.961547	Case/Ctrl	MG
K13483	41.6496	0.870914	0.376411	2.31373	0.0206823	0.231267	Case/Ctrl	MG
K01369	448.927	-0.259449	0.397867	-0.652099	0.514338	0.812036	Case/Ctrl	MG
K10548	1284.37	-0.0205313	0.114527	-0.17927	0.857726	0.962972	Case/Ctrl	MG
K00721	11340.7	-0.00719199	0.0412632	-0.174296	0.861633	0.963381	Case/Ctrl	MG
K00125	1060.29	-0.00995174	0.119154	-0.0835199	0.933438	0.978799	Case/Ctrl	MG
K11208	37.434	1.61606	0.955081	1.69207	0.0906332	0.393387	Case/Ctrl	MG
K09764	27.473	0.0157657	0.273989	0.0575413	0.954114	0.984232	Case/Ctrl	MG
K09971	124.161	0.593821	0.289132	2.0538	0.0399947	0.280463	Case/Ctrl	MG
K00983	1552.6	0.0998815	0.106841	0.93486	0.34986	0.70219	Case/Ctrl	MG
K00945	21391	-0.0952671	0.0321747	-2.96093	0.00306709	0.138575	Case/Ctrl	MG
K16087	223.546	0.250324	0.276283	0.906045	0.364912	0.714956	Case/Ctrl	MG
K13657	104.91	0.232632	0.439995	0.528716	0.597003	0.8573	Case/Ctrl	MG
K05343	5759.75	0.0249937	0.0742401	0.33666	0.736373	0.914165	Case/Ctrl	MG
K05596	109.382	0.836313	0.412319	2.02832	0.042528	0.287469	Case/Ctrl	MG
K16130	10.1845	0.620136	0.836575	0.741279	0.458524	0.782085	Case/Ctrl	MG
K14314	16197.7	-0.0202053	0.0653928	-0.308983	0.757334	0.923148	Case/Ctrl	MG
K09814	19.9486	-0.697886	0.420275	-1.66054	0.0968049	0.409611	Case/Ctrl	MG
K03080	125.466	1.50518	0.542661	2.77369	0.00554237	0.17751	Case/Ctrl	MG
K12113	77.6472	1.82193	0.525455	3.46733	0.000525647	0.0749172	Case/Ctrl	MG
K03110	8612.37	-0.0273063	0.0408218	-0.668914	0.50355	0.805846	Case/Ctrl	MG
K02668	140.27	-0.18061	0.238896	-0.756018	0.449638	0.774556	Case/Ctrl	MG
K00685	18.4546	-0.619456	0.940755	-0.658466	0.510239	0.810698	Case/Ctrl	MG
K07653	136.394	-0.285924	0.272735	-1.04836	0.294474	0.653688	Case/Ctrl	MG
K13812	45.4485	1.11052	0.830675	1.33689	0.18126	0.545097	Case/Ctrl	MG
K03504	165.037	0.216554	0.429844	0.503796	0.614405	0.865849	Case/Ctrl	MG
K15497	134.796	-0.243472	0.22737	-1.07082	0.28425	0.64517	Case/Ctrl	MG
K03147	7668.72	-0.0730926	0.0877142	-0.833304	0.404673	0.739405	Case/Ctrl	MG
K00407	78.2165	-0.0855006	0.373278	-0.229054	0.818827	0.948279	Case/Ctrl	MG
K08485	32.5575	1.70376	0.633112	2.69108	0.00712209	0.187869	Case/Ctrl	MG
K02551	3301.5	-0.118598	0.115781	-1.02434	0.305676	0.664171	Case/Ctrl	MG
K03264	31.8222	0.734741	0.704028	1.04362	0.29666	0.655934	Case/Ctrl	MG
K01959	127.696	0.369894	0.227115	1.62867	0.103384	0.42269	Case/Ctrl	MG
K03182	1743.43	0.188661	0.122585	1.53903	0.123798	0.456233	Case/Ctrl	MG
K14009	34.4177	-1.02242	0.539926	-1.89362	0.0582753	0.327242	Case/Ctrl	MG
K05568	1502.15	-0.0265045	0.173587	-0.152687	0.878645	0.967279	Case/Ctrl	MG
K00327	8.81183	-0.392781	0.831812	-0.472199	0.636785	0.876654	Case/Ctrl	MG
K03844	9.00653	-0.39985	0.896249	-0.446137	0.655498	0.883663	Case/Ctrl	MG
K05928	194.294	-0.30962	0.286577	-1.08041	0.27996	0.640591	Case/Ctrl	MG
K02246	344.459	0.0520313	0.206858	0.251532	0.801403	0.941414	Case/Ctrl	MG
K03809	3615.47	0.171281	0.0660349	2.59379	0.0094924	0.198308	Case/Ctrl	MG
K02034	9455.23	0.00619095	0.0614999	0.100666	0.919816	0.977241	Case/Ctrl	MG
K00348	1715.98	-0.0166947	0.100025	-0.166905	0.867445	0.96566	Case/Ctrl	MG
K00899	475.401	0.172182	0.146902	1.17209	0.241163	0.606465	Case/Ctrl	MG
K10848	17.0106	0.113124	0.642419	0.176091	0.860222	0.963101	Case/Ctrl	MG
K10251	6.80599	-0.405849	0.790542	-0.513381	0.607685	#N/A	Case/Ctrl	MG
K02890	4836.48	-0.00133003	0.0225358	-0.0590185	0.952937	0.984041	Case/Ctrl	MG
K11188	70.8491	0.278893	0.41045	0.679482	0.496833	0.802438	Case/Ctrl	MG
K00504	350.172	-0.0254523	0.2348	-0.1084	0.913678	0.975556	Case/Ctrl	MG
K11121	17.3925	1.43754	0.910019	1.57968	0.114181	0.441269	Case/Ctrl	MG
K12410	9103.62	-0.0321136	0.0300837	-1.06747	0.285758	0.6475	Case/Ctrl	MG
K14430	10.0577	-0.301364	0.701832	-0.429396	#N/A	#N/A	Case/Ctrl	MG
K08884	37522.7	0.0196173	0.0493569	0.397458	0.69103	0.895996	Case/Ctrl	MG
K02963	4100.36	-0.0226352	0.0248051	-0.912523	0.361494	0.711572	Case/Ctrl	MG
K00185	539.862	0.43782	0.213596	2.04976	0.0403881	0.281397	Case/Ctrl	MG
K15922	263.434	-0.551836	0.384487	-1.43525	0.151215	0.505451	Case/Ctrl	MG
K13421	8.4658	-1.07769	0.832327	-1.29479	0.195393	0.563094	Case/Ctrl	MG
K13092	47.6941	-0.0644231	0.618333	-0.104188	0.91702	0.976606	Case/Ctrl	MG
K01771	2078.09	0.238375	0.148643	1.60367	0.108786	0.432065	Case/Ctrl	MG
K12823	18.4942	0.389649	0.997686	0.390553	#N/A	#N/A	Case/Ctrl	MG
K01768	379.317	0.152106	0.293671	0.517945	0.604496	0.862687	Case/Ctrl	MG
K04564	1795.16	0.439105	0.124687	3.52165	0.000428869	0.0745715	Case/Ctrl	MG
K08643	1648.23	0.327768	0.21715	1.50941	0.131194	0.470288	Case/Ctrl	MG
K03537	26.8656	1.21355	0.775557	1.56475	0.117643	0.447947	Case/Ctrl	MG
K13122	15.0632	0.77389	0.817476	0.946683	0.343801	0.696289	Case/Ctrl	MG
K15633	12776.1	-0.0159781	0.0294234	-0.543041	0.587102	0.85372	Case/Ctrl	MG
K07332	56.8985	1.0979	0.735851	1.49201	0.135696	0.478024	Case/Ctrl	MG
K02016	20716.7	-0.00454092	0.0329286	-0.137902	0.890318	0.968624	Case/Ctrl	MG
K06384	3424.51	0.0945533	0.075097	1.25908	0.208	0.572263	Case/Ctrl	MG
K01436	2470.13	-0.0821778	0.0968415	-0.84858	0.396115	0.734733	Case/Ctrl	MG
K03019	29.6842	0.0990797	0.468564	0.211454	0.832533	0.953228	Case/Ctrl	MG
K02617	107.28	0.686413	0.278601	2.46379	0.0137478	0.214389	Case/Ctrl	MG
K07723	297.426	0.32936	0.196252	1.67825	0.0932982	0.400733	Case/Ctrl	MG
K01003	268.245	-0.263591	0.223075	-1.18163	0.237354	0.603423	Case/Ctrl	MG
K06345	162.638	-0.463659	0.216588	-2.14075	0.0322945	0.258671	Case/Ctrl	MG
K13252	427.325	-0.0151766	0.182625	-0.0831026	0.93377	0.978799	Case/Ctrl	MG
K00604	8421.89	-0.00449844	0.0270658	-0.166203	0.867997	0.96566	Case/Ctrl	MG
K01913	47.6126	0.218962	0.275301	0.795355	0.426407	0.757369	Case/Ctrl	MG
K06504	216.921	-0.612707	0.482078	-1.27097	0.203739	0.569886	Case/Ctrl	MG
K07140	63.5655	1.56942	0.870197	1.80352	0.0713068	0.351376	Case/Ctrl	MG
K06900	42.0608	-0.731938	0.747601	-0.979049	0.327556	0.683542	Case/Ctrl	MG
K03530	13283.1	0.0238374	0.0897642	0.265556	0.790582	0.937033	Case/Ctrl	MG
K11636	579.607	-0.272697	0.154232	-1.7681	0.0770437	0.361434	Case/Ctrl	MG
K10877	1604.89	0.22793	0.17578	1.29667	0.194743	0.562655	Case/Ctrl	MG
K10325	93.6414	0.219927	0.360413	0.610208	0.541724	0.82611	Case/Ctrl	MG
K03621	7090.82	0.00122971	0.0523356	0.0234967	0.981254	0.9944	Case/Ctrl	MG
K08590	3070.25	0.0161592	0.10572	0.152849	0.878517	0.967279	Case/Ctrl	MG
K13043	1634.6	-0.0879053	0.154519	-0.568895	0.569427	0.840367	Case/Ctrl	MG
K14623	3759.31	0.0301211	0.0960259	0.313677	0.753766	0.921604	Case/Ctrl	MG
K03745	1148.77	-0.514921	0.323669	-1.59089	#N/A	#N/A	Case/Ctrl	MG
K11131	41.4349	0.670714	0.727274	0.922231	0.356408	0.706852	Case/Ctrl	MG
K02023	1382.2	-0.119229	0.172016	-0.693128	0.488229	0.79737	Case/Ctrl	MG
K01969	9.68631	0.0947977	0.571572	0.165854	0.868271	0.96566	Case/Ctrl	MG
K02240	384.537	0.664792	0.247092	2.69047	0.00713517	0.187869	Case/Ctrl	MG
K02214	5.34042	-1.30767	0.886495	-1.4751	0.140186	#N/A	Case/Ctrl	MG
K09747	3405.07	-0.035597	0.0518422	-0.686641	0.492309	0.799631	Case/Ctrl	MG
K13007	887.795	0.783448	0.247729	3.16252	0.00156412	0.11928	Case/Ctrl	MG
K09036	9.85699	-2.06225	0.881761	-2.33879	0.0193465	0.22724	Case/Ctrl	MG
K12574	11898	0.00375327	0.0538773	0.0696633	0.944462	0.981948	Case/Ctrl	MG
K00012	8760.32	-0.0052913	0.0594756	-0.0889658	0.929109	0.977445	Case/Ctrl	MG
K15256	2748.46	-0.0168849	0.093161	-0.181244	0.856176	0.96219	Case/Ctrl	MG
K04056	26.5535	-1.22061	0.400187	-3.05009	0.00228773	0.129761	Case/Ctrl	MG
K13820	10.6976	-0.355385	0.872759	-0.407197	0.683864	0.893366	Case/Ctrl	MG
K02649	96.669	0.719905	0.65105	1.10576	0.268831	0.631462	Case/Ctrl	MG
K09769	2103.48	0.10708	0.133819	0.800184	0.423604	0.755218	Case/Ctrl	MG
K10194	1315.72	-0.0918051	0.135228	-0.678892	0.497207	0.802438	Case/Ctrl	MG
K14654	403.23	-0.134146	0.182883	-0.733506	0.46325	0.784588	Case/Ctrl	MG
K00255	24.9912	-0.338532	0.991194	-0.34154	0.732697	0.912607	Case/Ctrl	MG
K03228	35.9028	0.373379	0.520578	0.717239	0.473227	0.789264	Case/Ctrl	MG
K07043	6351.74	0.0351371	0.0448063	0.7842	0.432923	0.76258	Case/Ctrl	MG
K02482	2273.66	0.0503628	0.113823	0.442465	0.658153	0.883663	Case/Ctrl	MG
K07692	46.9779	-0.528272	0.385859	-1.36908	0.170973	0.534848	Case/Ctrl	MG
K03988	61.8731	-1.46613	0.547739	-2.6767	0.00743506	0.187869	Case/Ctrl	MG
K05367	1211.92	0.392498	0.163546	2.39992	0.0163985	0.217991	Case/Ctrl	MG
K11535	117.072	0.692691	0.785896	0.881403	0.3781	0.724281	Case/Ctrl	MG
K00820	18154.1	-0.0419892	0.0295718	-1.41991	0.155635	0.50994	Case/Ctrl	MG
K08739	525.861	0.297566	0.226216	1.31541	0.188372	0.55417	Case/Ctrl	MG
K05540	10778	-0.022765	0.0364091	-0.625255	0.531804	0.822828	Case/Ctrl	MG
K15455	17.4429	-0.0709365	0.854925	-0.0829739	0.933872	0.978799	Case/Ctrl	MG
K03648	4951.95	0.0134145	0.0424133	0.316281	0.751789	0.920357	Case/Ctrl	MG
K02411	1843.15	-0.309447	0.141066	-2.19363	0.028262	0.247087	Case/Ctrl	MG
K01428	998.831	-0.111438	0.167214	-0.666435	0.505133	0.807158	Case/Ctrl	MG
K07797	129.916	1.90417	0.685664	2.77712	0.00548435	0.17751	Case/Ctrl	MG
K06274	209.138	2.72588	0.969233	2.81241	#N/A	#N/A	Case/Ctrl	MG
K02504	89.7544	1.42442	0.667715	2.13328	0.0329019	0.261178	Case/Ctrl	MG
K00791	9105.72	-0.0341126	0.0499241	-0.683289	0.494424	0.800824	Case/Ctrl	MG
K04068	7167.56	-0.0104025	0.0300854	-0.345766	0.729519	0.911604	Case/Ctrl	MG
K10228	3.71573	0.185614	0.794332	0.233673	0.815239	#N/A	Case/Ctrl	MG
K00974	3392.77	-0.0207853	0.0870679	-0.238725	0.811319	0.944948	Case/Ctrl	MG
K02496	1787.67	-0.107734	0.148051	-0.727683	0.466808	0.78701	Case/Ctrl	MG
K15986	7799.15	-0.101953	0.0552336	-1.84584	0.064915	0.339292	Case/Ctrl	MG
K03606	11807.8	-0.0822308	0.0634341	-1.29632	0.194866	0.562655	Case/Ctrl	MG
K13667	350.785	0.628578	0.240001	2.61906	0.00881713	0.196607	Case/Ctrl	MG
K03092	4649.24	0.0275815	0.0865337	0.318737	0.749926	0.919333	Case/Ctrl	MG
K14607	6.95787	0.904464	0.736676	1.22776	0.219536	#N/A	Case/Ctrl	MG
K07478	11724.1	0.0127536	0.0399266	0.319426	0.749404	0.919108	Case/Ctrl	MG
K09899	42.1386	1.71804	0.700487	2.45263	0.0141815	0.216679	Case/Ctrl	MG
K11166	322.325	0.431694	0.251857	1.71404	0.0865206	0.383953	Case/Ctrl	MG
K11441	58.616	-0.27731	0.425194	-0.652196	0.514275	0.812036	Case/Ctrl	MG
K12069	23.229	-1.46985	0.567321	-2.59087	0.00957336	0.198308	Case/Ctrl	MG
K13631	36.7359	1.70795	0.645663	2.64526	0.00816282	0.19157	Case/Ctrl	MG
K12690	60.6583	0.782247	0.508834	1.53733	0.124212	0.456936	Case/Ctrl	MG
K00243	4142.76	-0.0771598	0.0787261	-0.980104	0.327035	0.683513	Case/Ctrl	MG
K12990	629.83	0.246254	0.206484	1.1926	0.233025	0.597937	Case/Ctrl	MG
K04738	201.89	-0.27154	0.332434	-0.816823	0.41403	0.747083	Case/Ctrl	MG
K03385	882.826	0.322157	0.187075	1.72207	0.0850564	0.380718	Case/Ctrl	MG
K09145	374.514	-0.30715	0.215344	-1.42632	0.153775	0.508954	Case/Ctrl	MG
K13298	3.88497	0.351445	0.835581	0.4206	0.674047	#N/A	Case/Ctrl	MG
K02991	25.9041	0.253601	0.673768	0.376392	0.706626	0.903686	Case/Ctrl	MG
K02935	5947.66	0.0104012	0.0232639	0.447096	0.654806	0.883663	Case/Ctrl	MG
K04705	13.4421	-0.571932	0.866757	-0.659853	0.509348	0.809857	Case/Ctrl	MG
K11059	100.659	-0.0171516	0.345114	-0.0496982	0.960363	0.986206	Case/Ctrl	MG
K03834	457.623	0.0167324	0.166621	0.100422	0.920009	0.977241	Case/Ctrl	MG
K03387	1821.18	0.447375	0.164914	2.71277	0.0066723	0.187869	Case/Ctrl	MG
K06026	181.897	0.322475	0.600753	0.536784	0.591417	0.854932	Case/Ctrl	MG
K06969	14354	-0.191762	0.0769693	-2.49141	0.0127237	0.211351	Case/Ctrl	MG
K03326	1323.61	0.303734	0.164174	1.85007	0.0643028	0.337924	Case/Ctrl	MG
K02055	1179.89	0.301913	0.180983	1.66818	0.0952793	0.406121	Case/Ctrl	MG
K00555	51.0794	0.137618	0.700728	0.196394	0.844302	0.958651	Case/Ctrl	MG
K11092	9.2377	1.50033	0.787186	1.90594	0.0566576	0.322732	Case/Ctrl	MG
K03590	5573.25	-0.00356098	0.0587	-0.0606641	0.951627	0.984041	Case/Ctrl	MG
K04087	9581.26	0.00670798	0.0470668	0.14252	0.886669	0.967279	Case/Ctrl	MG
K02428	7109.04	-0.0345005	0.0384561	-0.897141	0.369644	0.719411	Case/Ctrl	MG
K10578	12.9227	-0.534859	0.820169	-0.652132	0.514316	0.812036	Case/Ctrl	MG
K09533	738.118	-0.782454	0.323622	-2.4178	0.0156146	0.217991	Case/Ctrl	MG
K02169	7549.49	0.132605	0.0756665	1.75249	0.0796893	0.365743	Case/Ctrl	MG
K01512	1750.04	-0.114226	0.098536	-1.15923	0.246363	0.613129	Case/Ctrl	MG
K00840	164.12	1.51545	0.700224	2.16423	0.0304465	0.253179	Case/Ctrl	MG
K00077	7400.35	-0.0385259	0.0462994	-0.832104	0.405351	0.739405	Case/Ctrl	MG
K07450	6525.06	-0.0368697	0.111526	-0.330592	0.740952	0.915956	Case/Ctrl	MG
K06353	10.938	0.519409	0.789149	0.658189	0.510416	0.810789	Case/Ctrl	MG
K01200	11341.3	0.0954917	0.0839198	1.13789	0.255166	0.621498	Case/Ctrl	MG
K01494	766.18	0.348377	0.13428	2.59441	0.00947527	0.198308	Case/Ctrl	MG
K06380	294.052	-0.0948589	0.350117	-0.270935	0.786441	0.934561	Case/Ctrl	MG
K07325	12.8166	-0.274675	0.917821	-0.299269	0.764735	0.924744	Case/Ctrl	MG
K08217	7099.01	0.00257531	0.0746667	0.0344907	0.972486	0.990135	Case/Ctrl	MG
K03403	7.59171	-0.553773	0.668707	-0.828125	0.4076	#N/A	Case/Ctrl	MG
K06962	1640.82	-0.173431	0.101449	-1.70953	0.0873527	0.385612	Case/Ctrl	MG
K02637	7.32665	-0.512384	0.810134	-0.632469	0.527081	#N/A	Case/Ctrl	MG
K09892	137.886	0.859209	0.329403	2.60838	0.00909716	0.198079	Case/Ctrl	MG
K02171	10.5112	-1.26025	0.924685	-1.3629	0.172915	0.537665	Case/Ctrl	MG
K06861	2145.77	0.0719707	0.118831	0.605656	0.544743	0.827481	Case/Ctrl	MG
K08167	345.433	0.133877	0.250842	0.533708	0.593543	0.855404	Case/Ctrl	MG
K01808	5730.51	-0.0144996	0.0283423	-0.511589	0.608939	0.865084	Case/Ctrl	MG
K07640	342.972	0.418879	0.233626	1.79294	0.0729818	0.353304	Case/Ctrl	MG
K02556	1375.76	-0.0842089	0.12207	-0.689842	0.490293	0.798323	Case/Ctrl	MG
K03767	619.826	0.228244	0.165516	1.37898	0.1679	0.530659	Case/Ctrl	MG
K07717	239.15	-0.0252913	0.177218	-0.142713	0.886517	0.967279	Case/Ctrl	MG
K02622	4103.91	0.0755627	0.113555	0.665429	0.505776	0.807896	Case/Ctrl	MG
K09783	47.1449	0.0466683	0.439028	0.106299	0.915345	0.97591	Case/Ctrl	MG
K03555	29378.8	-0.0478307	0.0380435	-1.25726	0.208659	0.572877	Case/Ctrl	MG
K00611	9855.66	-0.0213612	0.0447529	-0.477314	0.633138	0.875223	Case/Ctrl	MG
K02921	17.1324	1.06001	0.663178	1.59838	0.109958	0.434665	Case/Ctrl	MG
K00798	5010.47	0.0680538	0.0550429	1.23638	0.216318	0.580972	Case/Ctrl	MG
K01209	16172.6	-0.0376204	0.0928923	-0.40499	0.685485	0.894319	Case/Ctrl	MG
K02817	550.171	0.108575	0.192391	0.564343	0.572521	0.84245	Case/Ctrl	MG
K14125	11.0352	0.746739	0.849114	0.879433	0.379167	0.724281	Case/Ctrl	MG
K13853	9.2434	2.43671	0.835436	2.91669	0.00353765	0.147922	Case/Ctrl	MG
K00937	15849.6	-0.00510128	0.0554005	-0.0920801	0.926634	0.977445	Case/Ctrl	MG
K12344	912.511	0.405717	0.181763	2.23213	0.0256066	0.242951	Case/Ctrl	MG
K04654	1958.23	-0.04056	0.103058	-0.393564	0.693903	0.898164	Case/Ctrl	MG
K08961	2399.36	0.45597	0.22358	2.0394	0.0414099	0.284782	Case/Ctrl	MG
K10074	47.5488	-1.05627	0.9371	-1.12717	0.259671	0.624783	Case/Ctrl	MG
K06839	62.0057	-0.11136	0.658574	-0.169093	#N/A	#N/A	Case/Ctrl	MG
K14358	87.6861	0.187239	0.437639	0.427838	0.668769	0.889239	Case/Ctrl	MG
K04456	13.5021	-0.389589	0.981581	-0.396899	0.691442	0.896185	Case/Ctrl	MG
K08086	1776.84	0.0880875	0.163528	0.538671	0.590114	0.854734	Case/Ctrl	MG
K11607	54.7278	0.95625	0.618617	1.54579	0.122156	0.454843	Case/Ctrl	MG
K02076	97.9972	-0.0505635	0.306131	-0.165169	0.868811	0.96566	Case/Ctrl	MG
K15270	3134.99	-0.0258013	0.0794861	-0.324601	0.745483	0.91857	Case/Ctrl	MG
K15546	4108.89	-0.0084774	0.0909137	-0.0932468	0.925708	0.977241	Case/Ctrl	MG
K15914	1446.54	0.324225	0.13511	2.39971	0.016408	0.217991	Case/Ctrl	MG
K12983	24079.1	0.0410437	0.0456263	0.899562	0.368353	0.718978	Case/Ctrl	MG
K09706	1020.25	-0.0487556	0.135956	-0.358613	0.719885	0.90822	Case/Ctrl	MG
K03598	85.1154	0.802341	0.506397	1.58441	0.1131	0.440827	Case/Ctrl	MG
K08257	1133.85	0.322013	0.233354	1.37993	0.167608	0.530513	Case/Ctrl	MG
K00135	126.305	0.840045	0.33175	2.53216	0.0113361	0.210544	Case/Ctrl	MG
K01026	1349.31	-0.0456608	0.120972	-0.37745	0.70584	0.90317	Case/Ctrl	MG
K04459	15.8602	0.134158	0.717594	0.186955	0.851696	0.961371	Case/Ctrl	MG
K00287	4184.16	-0.00830528	0.03779	-0.219775	0.826047	0.950752	Case/Ctrl	MG
K10353	123.608	-0.0136795	0.462646	-0.029568	0.976412	0.991693	Case/Ctrl	MG
K01491	8042.07	-0.00452083	0.0310402	-0.145644	0.884202	0.967279	Case/Ctrl	MG
K07126	12590.1	0.0696629	0.0714347	0.975197	0.329463	0.684643	Case/Ctrl	MG
K08304	2104.46	-0.0719459	0.089958	-0.799772	0.423843	0.755244	Case/Ctrl	MG
K04013	257.035	0.721537	0.238233	3.02871	0.00245603	0.131734	Case/Ctrl	MG
K02262	3.7503	-0.146381	0.536538	-0.272826	0.784987	#N/A	Case/Ctrl	MG
K05298	4.55633	0.413756	0.618961	0.668468	0.503835	#N/A	Case/Ctrl	MG
K09612	943.015	0.0437356	0.19399	0.225453	0.821627	0.949887	Case/Ctrl	MG
K11070	5398.74	-0.0180498	0.0350499	-0.514974	0.606571	0.864769	Case/Ctrl	MG
K14841	41.8555	0.101782	0.77943	0.130586	0.896103	0.970066	Case/Ctrl	MG
K06921	25160.1	-0.340839	0.109668	-3.10792	0.00188411	0.122018	Case/Ctrl	MG
K15789	1300.89	0.28551	0.129025	2.21282	0.02691	0.2448	Case/Ctrl	MG
K07578	400.355	-0.44742	0.298581	-1.49849	0.134006	0.476201	Case/Ctrl	MG
K15036	39.1678	0.677802	0.385881	1.7565	0.0790024	0.365529	Case/Ctrl	MG
K08094	631.208	0.29312	0.120528	2.43197	0.015017	0.217991	Case/Ctrl	MG
K13052	4439.11	-0.0292349	0.0549428	-0.532098	0.594658	0.85611	Case/Ctrl	MG
K09813	158.937	-0.0250117	0.33861	-0.0738656	0.941117	0.98194	Case/Ctrl	MG
K00320	129.562	0.993371	0.478558	2.07576	0.0379161	0.273562	Case/Ctrl	MG
K01586	11491	-0.0271382	0.0317315	-0.855245	0.392415	0.73219	Case/Ctrl	MG
K07008	676.438	0.021758	0.241544	0.090079	0.928224	0.977445	Case/Ctrl	MG
K14057	180.036	0.066314	0.317422	0.208914	0.834515	0.953813	Case/Ctrl	MG
K00892	97.3803	1.73485	0.716462	2.4214	0.0154607	0.217991	Case/Ctrl	MG
K04065	171.955	0.762439	0.31199	2.44379	0.0145339	0.217426	Case/Ctrl	MG
K07141	4320.52	-0.129684	0.0578952	-2.23998	0.0250919	0.241591	Case/Ctrl	MG
K06296	1633.74	0.056412	0.144929	0.38924	0.697099	0.899361	Case/Ctrl	MG
K01502	57.825	-0.689891	0.271337	-2.54257	0.0110042	0.209678	Case/Ctrl	MG
K09834	172.478	0.686605	0.30047	2.2851	0.0223067	0.235099	Case/Ctrl	MG
K02800	11.2471	-0.953296	0.586293	-1.62597	0.103956	0.423626	Case/Ctrl	MG
K00663	443.2	0.473233	0.210023	2.25324	0.0242438	0.241212	Case/Ctrl	MG
K14269	102.623	1.46491	0.83548	1.75337	0.0795377	0.365743	Case/Ctrl	MG
K00101	2622.64	0.0215317	0.0840619	0.256142	0.797841	0.939655	Case/Ctrl	MG
K06314	11.2966	-0.367971	0.744326	-0.494368	0.621047	0.868322	Case/Ctrl	MG
K08892	121.726	0.21893	0.226714	0.965664	0.334212	0.688872	Case/Ctrl	MG
K15523	306.254	0.404231	0.301328	1.3415	0.179758	0.545097	Case/Ctrl	MG
K01756	12510.9	-0.0790734	0.0390696	-2.02391	0.0429793	0.287675	Case/Ctrl	MG
K06441	6871.58	-0.0669845	0.104883	-0.63866	0.523044	0.816968	Case/Ctrl	MG
K00188	37.5362	0.644361	0.36757	1.75303	0.0795973	0.365743	Case/Ctrl	MG
K04092	233.9	0.0344294	0.354073	0.0972384	0.922537	0.977241	Case/Ctrl	MG
K03215	21974.8	-0.0329286	0.0260603	-1.26355	0.206391	0.572249	Case/Ctrl	MG
K06287	6338.73	-0.0106579	0.0355809	-0.29954	0.764528	0.924744	Case/Ctrl	MG
K16176	52.6281	-0.210614	0.377459	-0.55798	0.576858	0.844954	Case/Ctrl	MG
K13542	3209.71	0.107303	0.0992728	1.08089	0.279745	0.640591	Case/Ctrl	MG
K09890	27.4984	1.68234	0.733027	2.29505	0.02173	0.23257	Case/Ctrl	MG
K09910	40.5169	1.7721	0.736986	2.40452	0.0161937	0.217991	Case/Ctrl	MG
K15268	1008.7	-0.0333827	0.150521	-0.22178	0.824485	0.950752	Case/Ctrl	MG
K07155	71.212	-0.300571	0.301785	-0.995979	0.31926	0.677618	Case/Ctrl	MG
K12341	2227.98	-0.208051	0.336471	-0.618334	0.536355	0.824559	Case/Ctrl	MG
K03658	2103.6	0.480797	0.177498	2.70874	0.00675391	0.187869	Case/Ctrl	MG
K07584	3155.06	-0.0981097	0.069126	-1.41929	0.155815	0.50994	Case/Ctrl	MG
K11633	113.583	0.338388	0.236631	1.43003	0.15271	0.507331	Case/Ctrl	MG
K14488	24.195	-0.948248	0.911209	-1.04065	0.298039	0.657826	Case/Ctrl	MG
K00362	1326.47	0.152321	0.160117	0.951311	0.341446	0.693399	Case/Ctrl	MG
K01739	76.951	0.162583	0.324689	0.500735	0.616558	0.866889	Case/Ctrl	MG
K03437	10656.4	-0.0603751	0.032459	-1.86004	0.0628797	0.333837	Case/Ctrl	MG
K08673	28.7246	-0.384006	0.804385	-0.47739	0.633084	0.875223	Case/Ctrl	MG
K06636	1972.14	0.0562141	0.128617	0.437065	0.662065	0.885636	Case/Ctrl	MG
K15064	17.2324	0.194572	0.813181	0.239273	0.810894	0.944943	Case/Ctrl	MG
K15511	9.37176	-0.328588	0.739329	-0.444442	0.656723	0.883663	Case/Ctrl	MG
K06362	88.3233	-0.0608524	0.669561	-0.0908841	0.927585	0.977445	Case/Ctrl	MG
K03736	401.11	0.307106	0.162767	1.88678	0.0591894	0.329584	Case/Ctrl	MG
K09229	199.865	-0.670622	0.43418	-1.54457	0.12245	0.455182	Case/Ctrl	MG
K02847	2554.74	0.167402	0.105598	1.58528	0.112902	0.440827	Case/Ctrl	MG
K07074	716.963	-0.0885615	0.183303	-0.483142	0.628995	0.873071	Case/Ctrl	MG
K00073	114.008	1.30269	0.328648	3.96377	7.37752e-05	0.0310409	Case/Ctrl	MG
K13012	1863.04	-0.042789	0.0950852	-0.450008	0.652705	0.88306	Case/Ctrl	MG
K06074	301.191	-0.3731	0.329112	-1.13366	0.256939	0.623337	Case/Ctrl	MG
K11485	91.2097	0.565381	0.488557	1.15725	0.247172	0.613673	Case/Ctrl	MG
K00406	80.209	0.554562	0.41936	1.3224	0.186035	0.550774	Case/Ctrl	MG
K02256	13.3484	-0.792661	0.557376	-1.42213	0.154989	0.509666	Case/Ctrl	MG
K03843	183.496	-0.0799908	0.315658	-0.253409	0.799952	0.940728	Case/Ctrl	MG
K10563	1513.31	0.594745	0.175018	3.39819	0.000678339	0.0787341	Case/Ctrl	MG
K01909	3.84057	0.221039	0.699174	0.316142	0.751894	#N/A	Case/Ctrl	MG
K07282	10236.7	0.0657509	0.0491373	1.3381	0.180862	0.545097	Case/Ctrl	MG
K01709	2060.02	0.0043926	0.10172	0.0431835	0.965555	0.988469	Case/Ctrl	MG
K07660	252.19	0.45624	0.258965	1.76178	0.0781059	0.362877	Case/Ctrl	MG
K05570	146.137	-0.0237844	0.188577	-0.126126	0.899632	0.971147	Case/Ctrl	MG
K08302	1229.65	0.0705447	0.134191	0.525702	0.599095	0.858313	Case/Ctrl	MG
K09422	192.192	-0.199983	0.240088	-0.832957	0.404869	0.739405	Case/Ctrl	MG
K01470	1742.82	-0.124964	0.0938674	-1.33128	0.183097	0.547098	Case/Ctrl	MG
K05936	3849.37	-0.0916217	0.0605694	-1.51267	0.130363	0.468554	Case/Ctrl	MG
K07098	14630.1	0.0246412	0.0394494	0.624627	0.532216	0.822828	Case/Ctrl	MG
K07699	8729.13	-0.00504715	0.0858706	-0.0587763	0.95313	0.984041	Case/Ctrl	MG
K11107	25.0151	1.76992	0.717535	2.46667	0.0136375	0.214389	Case/Ctrl	MG
K05296	2.30724	0.189664	0.641373	0.295716	0.767447	#N/A	Case/Ctrl	MG
K07287	135.795	0.572948	0.260905	2.196	0.0280919	0.247087	Case/Ctrl	MG
K00806	6688.02	0.00453539	0.0286851	0.15811	0.87437	0.967093	Case/Ctrl	MG
K10475	100.495	-0.755165	0.600124	-1.25835	0.208266	0.572263	Case/Ctrl	MG
K02003	30583.4	0.00693772	0.0440849	0.157372	0.874952	0.967093	Case/Ctrl	MG
K11346	8.41164	-0.480162	0.773948	-0.620406	0.534991	0.824327	Case/Ctrl	MG
K01817	3162.89	-0.0483615	0.0683648	-0.707404	0.479316	0.793204	Case/Ctrl	MG
K02584	2862.94	0.17258	0.125336	1.37694	0.168532	0.53091	Case/Ctrl	MG
K05636	150.253	-0.9507	0.498262	-1.90803	0.0563869	0.322544	Case/Ctrl	MG
K03712	528.924	-0.0777326	0.159457	-0.487484	0.625916	0.870412	Case/Ctrl	MG
K08582	317.017	0.097204	0.318152	0.305527	0.759965	0.923148	Case/Ctrl	MG
K06052	38.1049	-0.122975	0.435735	-0.282225	0.777771	0.930018	Case/Ctrl	MG
K09917	22.7109	1.68088	0.669136	2.51201	0.0120046	0.211005	Case/Ctrl	MG
K06133	4539.63	-0.0735372	0.0432449	-1.70048	0.0890406	0.390502	Case/Ctrl	MG
K02624	57.0219	0.296137	0.399333	0.741579	0.458342	0.782085	Case/Ctrl	MG
K13575	22.9598	-0.556617	0.857929	-0.648792	0.516473	0.812964	Case/Ctrl	MG
K00109	32.9249	0.0890173	0.40025	0.222404	0.823999	0.950752	Case/Ctrl	MG
K13497	899.172	0.207205	0.136024	1.5233	0.127683	0.463793	Case/Ctrl	MG
K00757	5291.79	0.00514186	0.0439582	0.116972	0.906883	0.973978	Case/Ctrl	MG
K05577	19.6499	-0.0472235	0.931707	-0.0506849	0.959577	0.985939	Case/Ctrl	MG
K11699	291.582	0.0878659	0.390345	0.225098	0.821903	0.949957	Case/Ctrl	MG
K00613	110.666	0.297835	0.229252	1.29916	0.193889	0.562127	Case/Ctrl	MG
K08764	173.843	0.327744	0.249864	1.31169	0.189625	0.555024	Case/Ctrl	MG
K13213	396.098	-0.0802328	0.538007	-0.14913	0.881451	0.967279	Case/Ctrl	MG
K16267	26.0101	0.196177	0.436694	0.449232	0.653265	0.883265	Case/Ctrl	MG
K01710	11817.2	-0.0671168	0.0486262	-1.38026	0.167507	0.530513	Case/Ctrl	MG
K05836	354.662	-0.0228897	0.198611	-0.115249	0.908248	0.97401	Case/Ctrl	MG
K05129	54.1912	-0.41625	0.821556	-0.50666	0.612393	0.865084	Case/Ctrl	MG
K13819	533.844	-0.154394	0.117755	-1.31115	0.189807	0.555149	Case/Ctrl	MG
K09823	61.55	0.890752	0.582584	1.52897	0.126272	0.46099	Case/Ctrl	MG
K00381	227.645	1.42908	0.474361	3.01264	0.00258986	0.131776	Case/Ctrl	MG
K01892	11854.2	-0.00963866	0.0267522	-0.360294	0.718627	0.908137	Case/Ctrl	MG
K12555	178.637	0.938519	0.37036	2.53407	0.0112746	0.210544	Case/Ctrl	MG
K13370	10.0366	0.820321	0.485825	1.68851	0.0913132	0.395064	Case/Ctrl	MG
K00423	177.861	0.688824	0.491221	1.40227	0.160835	0.518132	Case/Ctrl	MG
K15889	346.629	-0.189131	0.275198	-0.687254	0.491923	0.799631	Case/Ctrl	MG
K13173	517.623	-0.0778464	0.278493	-0.279527	0.77984	0.93044	Case/Ctrl	MG
K13810	526.567	0.0284608	0.196242	0.14503	0.884688	0.967279	Case/Ctrl	MG
K15186	385.892	-0.0534947	0.33667	-0.158893	0.873753	0.967093	Case/Ctrl	MG
K12945	55.1952	1.41233	0.757049	1.86557	0.062102	0.333302	Case/Ctrl	MG
K12056	243.827	1.32204	0.49599	2.66546	0.00768841	0.188766	Case/Ctrl	MG
K14049	56.3101	-2.08324	0.771505	-2.70022	0.00692929	0.187869	Case/Ctrl	MG
K14265	1317.27	-0.240375	0.124125	-1.93656	0.0527993	0.313789	Case/Ctrl	MG
K15865	48.6714	0.590134	0.644558	0.915565	0.359895	0.710005	Case/Ctrl	MG
K11456	41.2983	-0.866604	1.03093	-0.8406	0.400572	0.735784	Case/Ctrl	MG
K05833	7179.82	-0.0829966	0.060179	-1.37916	0.167845	0.530659	Case/Ctrl	MG
K02981	29.2551	0.402318	0.658919	0.610572	0.541483	0.82611	Case/Ctrl	MG
K07449	385.273	-0.0294675	0.166304	-0.17719	0.859359	0.963082	Case/Ctrl	MG
K00598	1411.07	-0.012826	0.110369	-0.11621	0.907486	0.97401	Case/Ctrl	MG
K05982	66.4795	0.620751	0.743359	0.835061	0.403683	0.73908	Case/Ctrl	MG
K00036	1638.88	0.346016	0.174355	1.98455	0.0471942	0.297085	Case/Ctrl	MG
K05989	21409.4	-0.00146692	0.0789817	-0.0185729	0.985182	0.995376	Case/Ctrl	MG
K03289	1083.62	-0.433652	0.211898	-2.04651	0.0407065	0.28164	Case/Ctrl	MG
K08129	88.9708	-0.0031284	0.330596	-0.00946291	0.99245	0.996863	Case/Ctrl	MG
K12164	14.1295	0.708726	0.831525	0.852322	0.394036	0.733134	Case/Ctrl	MG
K01044	6.40055	0.257313	0.801943	0.320862	0.748315	#N/A	Case/Ctrl	MG
K01592	57.3069	1.1644	0.845313	1.37748	0.168365	0.530882	Case/Ctrl	MG
K06252	6888	0.294109	0.104264	2.8208	0.00479034	0.172179	Case/Ctrl	MG
K12284	2996.59	0.256378	0.107798	2.37832	0.0173918	0.22172	Case/Ctrl	MG
K07048	458.26	0.295694	0.171646	1.72269	0.0849444	0.380469	Case/Ctrl	MG
K14855	9.94524	-0.388804	0.874144	-0.444783	0.656477	0.883663	Case/Ctrl	MG
K14196	102.126	-0.0871858	0.423069	-0.206079	0.836729	0.954272	Case/Ctrl	MG
K02278	1635.09	-0.197797	0.105692	-1.87145	0.0612831	0.332172	Case/Ctrl	MG
K10386	22.0822	0.549512	0.896863	0.612704	0.540072	0.82611	Case/Ctrl	MG
K01794	171.438	0.0975448	0.563173	0.173206	0.86249	0.964018	Case/Ctrl	MG
K15067	7.99734	-0.145257	0.791024	-0.183631	0.854303	0.961547	Case/Ctrl	MG
K06209	2814.76	-0.117447	0.0553823	-2.12067	0.0339497	0.265755	Case/Ctrl	MG
K09477	79.7837	1.24008	0.700469	1.77035	0.0766684	0.361188	Case/Ctrl	MG
K14571	128.09	-1.00321	0.434509	-2.30884	0.0209525	0.231267	Case/Ctrl	MG
K02895	4184.63	-0.00677063	0.0242432	-0.27928	0.78003	0.93044	Case/Ctrl	MG
K06596	136.938	-0.723074	0.531638	-1.36009	0.173803	0.538629	Case/Ctrl	MG
K12985	48.2194	1.82968	1.02848	1.77902	0.0752363	0.357073	Case/Ctrl	MG
K04757	888.255	0.0891637	0.126496	0.704873	0.480889	0.794424	Case/Ctrl	MG
K01719	1726.29	0.0181528	0.12384	0.146583	0.883461	0.967279	Case/Ctrl	MG
K00876	14185.4	-0.0699494	0.0333077	-2.1001	0.0357202	0.267484	Case/Ctrl	MG
K07675	1714.97	0.165219	0.152863	1.08083	0.279773	0.640591	Case/Ctrl	MG
K07481	16699.7	-0.377331	0.159419	-2.36692	0.0179368	0.223199	Case/Ctrl	MG
K01129	8904.2	-0.0633151	0.0726037	-0.872064	0.383174	0.72741	Case/Ctrl	MG
K01870	24993.6	-0.00490964	0.0199574	-0.246006	0.805678	0.943496	Case/Ctrl	MG
K01939	12841.5	-0.00961033	0.0230504	-0.416926	0.676732	0.89126	Case/Ctrl	MG
K15765	5.38638	0.336583	0.817531	0.411707	0.680554	#N/A	Case/Ctrl	MG
K00467	144.501	0.0346003	0.258635	0.133781	0.893576	0.969481	Case/Ctrl	MG
K16264	2172.41	0.211277	0.10106	2.09062	0.0365623	0.270481	Case/Ctrl	MG
K03413	2185.27	-0.0923024	0.102138	-0.903707	0.366151	0.716132	Case/Ctrl	MG
K07561	38.9154	0.512856	0.75364	0.680505	0.496185	0.801997	Case/Ctrl	MG
K07011	31680.1	-0.0567759	0.0509233	-1.11493	0.264881	0.627439	Case/Ctrl	MG
K07737	7615.19	0.095899	0.0583108	1.64462	0.100049	0.415556	Case/Ctrl	MG
K01702	2776.38	0.12014	0.12107	0.992319	0.321042	0.677723	Case/Ctrl	MG
K13009	3992.26	0.0512488	0.127002	0.403527	0.686561	0.894762	Case/Ctrl	MG
K14120	944.926	0.148945	0.123937	1.20178	0.229449	0.594325	Case/Ctrl	MG
K16051	37.7391	0.203069	0.319513	0.635559	0.525064	0.818455	Case/Ctrl	MG
K14743	166.475	-0.351991	0.289485	-1.21592	0.224016	0.589497	Case/Ctrl	MG
K01206	15300.6	0.040582	0.0882028	0.460099	0.645445	0.880966	Case/Ctrl	MG
K02778	432.745	-0.0305373	0.196872	-0.155112	0.876733	0.967093	Case/Ctrl	MG
K07184	5740.54	0.125432	0.104469	1.20067	0.229879	0.595142	Case/Ctrl	MG
K02538	250.963	0.248709	0.248746	0.99985	0.317383	0.675754	Case/Ctrl	MG
K13570	98.0656	0.0320989	0.389269	0.0824595	0.934281	0.979076	Case/Ctrl	MG
K00635	274.422	-0.303543	0.412714	-0.735481	0.462046	0.783906	Case/Ctrl	MG
K03856	5557.87	-0.0624069	0.0615505	-1.01391	0.310624	0.668518	Case/Ctrl	MG
K02314	18239.1	0.108579	0.0434419	2.49941	0.0124401	0.211351	Case/Ctrl	MG
K01034	612.504	0.106218	0.151049	0.703203	0.481929	0.794553	Case/Ctrl	MG
K01455	382.602	0.144971	0.171559	0.84502	0.3981	0.735468	Case/Ctrl	MG
K07224	103.993	0.719652	0.39074	1.84177	0.0655088	0.340211	Case/Ctrl	MG
K13003	25.2436	0.343676	0.364152	0.943773	0.345286	0.698666	Case/Ctrl	MG
K07460	4192.67	0.0409758	0.0527195	0.777243	0.437016	0.766059	Case/Ctrl	MG
K03131	42.6436	0.907343	0.732993	1.23786	0.215768	0.580547	Case/Ctrl	MG
K01787	2225.72	0.0145875	0.119152	0.122427	0.90256	0.972166	Case/Ctrl	MG
K07110	8879.52	-0.0116961	0.0621258	-0.188264	0.850669	0.96124	Case/Ctrl	MG
K03202	27.2039	0.786802	0.551594	1.42641	0.153749	0.508954	Case/Ctrl	MG
K07469	1436.89	-0.0471772	0.152862	-0.308627	0.757606	0.923148	Case/Ctrl	MG
K07616	25.2449	-1.29431	0.933472	-1.38656	0.165576	0.528274	Case/Ctrl	MG
K13638	14326.6	-0.0232679	0.0460852	-0.504888	0.613638	0.865677	Case/Ctrl	MG
K15735	42.1381	1.68705	0.812847	2.07548	0.0379416	0.273562	Case/Ctrl	MG
K02528	10361.1	-0.0203638	0.0255597	-0.796716	0.425616	0.756801	Case/Ctrl	MG
K06369	81.0534	0.366121	0.718097	0.50985	0.610157	0.865084	Case/Ctrl	MG
K02024	158.441	1.47564	0.763949	1.93159	0.0534099	0.315508	Case/Ctrl	MG
K14792	23.18	-1.0094	0.774583	-1.30315	0.192524	0.558892	Case/Ctrl	MG
K02568	76.6725	0.615762	0.244303	2.52049	0.0117193	0.210544	Case/Ctrl	MG
K04767	3812.22	0.0876714	0.071106	1.23297	0.217588	0.582427	Case/Ctrl	MG
K11689	3859.98	-0.0484829	0.0746612	-0.649372	0.516098	0.812964	Case/Ctrl	MG
K14744	165.173	-0.592726	0.613222	-0.966576	0.333756	0.688583	Case/Ctrl	MG
K12388	615.144	0.0817645	0.333437	0.245217	0.806288	0.943496	Case/Ctrl	MG
K15553	237.384	0.182809	0.254536	0.718203	0.472632	0.788853	Case/Ctrl	MG
K01797	429.38	0.0209622	0.144252	0.145317	0.88446	0.967279	Case/Ctrl	MG
K10219	2.95538	1.1911	0.772872	1.54113	0.123284	#N/A	Case/Ctrl	MG
K09454	44.9256	2.65564	0.962805	2.75823	0.00581154	0.181126	Case/Ctrl	MG
K00793	3293.99	-0.0121565	0.0647297	-0.187804	0.851031	0.961371	Case/Ctrl	MG
K02319	485.267	-0.420162	0.417876	-1.00547	0.314671	0.672777	Case/Ctrl	MG
K03687	7139.59	-0.0125764	0.0346997	-0.362436	0.717026	0.907164	Case/Ctrl	MG
K14162	9.47381	1.43662	0.682505	2.10492	0.0352983	0.267172	Case/Ctrl	MG
K00953	41.5764	-1.6067	0.430564	-3.73163	0.000190245	0.0465692	Case/Ctrl	MG
K02342	10672.8	-0.0182299	0.046761	-0.389852	0.696646	0.899211	Case/Ctrl	MG
K07707	6053.26	-0.0364641	0.107082	-0.340524	0.733462	0.912687	Case/Ctrl	MG
K12661	67.506	0.802187	0.426557	1.88061	0.0600255	0.331226	Case/Ctrl	MG
K04027	2147.79	0.00651236	0.100755	0.0646356	0.948464	0.983456	Case/Ctrl	MG
K00929	3494.9	0.101952	0.0989254	1.0306	0.302729	0.660944	Case/Ctrl	MG
K12598	49.4983	0.946608	0.443826	2.13284	0.0329382	0.261178	Case/Ctrl	MG
K02268	26.581	-0.0696195	0.96075	-0.0724638	0.942233	0.98194	Case/Ctrl	MG
K06159	105.411	1.91255	0.789992	2.42097	0.0154791	0.217991	Case/Ctrl	MG
K09935	1424.08	0.0179945	0.121013	0.148699	0.881791	0.967279	Case/Ctrl	MG
K03222	59.9749	0.22048	0.458918	0.480434	0.630919	0.873881	Case/Ctrl	MG
K10841	2965.14	-0.0424547	0.147717	-0.287406	0.773801	0.927923	Case/Ctrl	MG
K13339	12.8638	1.28809	0.951948	1.35311	0.17602	0.541108	Case/Ctrl	MG
K12700	175.74	1.65515	0.358777	4.6133	3.96317e-06	0.0168589	Case/Ctrl	MG
K13963	4166.94	-0.0641281	0.0807741	-0.793919	0.427242	0.757891	Case/Ctrl	MG
K06413	8359.35	-0.170391	0.0704453	-2.41878	0.0155728	0.217991	Case/Ctrl	MG
K00934	1535.79	0.170171	0.133798	1.27186	0.203424	0.569592	Case/Ctrl	MG
K02509	75.4208	1.02186	0.62946	1.62339	0.104506	0.423868	Case/Ctrl	MG
K15226	43.2497	0.270427	0.492963	0.548576	0.583297	0.851052	Case/Ctrl	MG
K13648	6.73247	0.153505	0.844551	0.18176	0.855771	#N/A	Case/Ctrl	MG
K13796	25.2644	-0.105681	0.401257	-0.263375	0.792262	0.937182	Case/Ctrl	MG
K02666	595.688	0.199494	0.200659	0.994196	0.320127	0.677618	Case/Ctrl	MG
K02952	5608.87	-0.0277512	0.0310097	-0.894921	0.370829	0.720261	Case/Ctrl	MG
K11383	296.802	0.790246	0.260599	3.03242	0.002426	0.131708	Case/Ctrl	MG
K15540	243.776	1.68149	0.838778	2.00469	0.0449957	0.292385	Case/Ctrl	MG
K03892	10835.9	0.064879	0.0541523	1.19808	0.230884	0.59586	Case/Ctrl	MG
K13927	940.087	-0.0763637	0.136935	-0.557666	0.577073	0.84499	Case/Ctrl	MG
K06702	120.052	-0.204872	0.330453	-0.619971	0.535277	0.824327	Case/Ctrl	MG
K15176	1841.63	-0.30746	0.1612	-1.90732	0.0564787	0.322623	Case/Ctrl	MG
K06979	2559.21	0.0410224	0.114027	0.359761	0.719026	0.908137	Case/Ctrl	MG
K00218	99.4756	-0.18728	0.272494	-0.687282	0.491905	0.799631	Case/Ctrl	MG
K03577	6192.2	0.00609322	0.0577315	0.105544	0.915944	0.9761	Case/Ctrl	MG
K07670	662.501	0.0350789	0.173818	0.201814	0.840062	0.9564	Case/Ctrl	MG
K14653	22.1487	0.906791	0.833023	1.08856	0.27635	0.639262	Case/Ctrl	MG
K09922	985.463	0.0319034	0.123312	0.25872	0.795851	0.938296	Case/Ctrl	MG
K01751	1416.32	0.0219084	0.11882	0.184383	0.853713	0.961547	Case/Ctrl	MG
K09123	999.715	0.113518	0.230053	0.493444	0.621699	0.868322	Case/Ctrl	MG
K07316	5930.58	-0.150851	0.111798	-1.34932	0.177233	0.542538	Case/Ctrl	MG
K06079	1789.19	0.14939	0.136271	1.09627	0.272962	0.634962	Case/Ctrl	MG
K11996	4862.32	-0.0738287	0.0636767	-1.15943	0.246281	0.613129	Case/Ctrl	MG
K07508	62.2673	0.182871	0.278856	0.655789	0.51196	0.811473	Case/Ctrl	MG
K03390	1165.95	0.171683	0.119793	1.43317	0.15181	0.505682	Case/Ctrl	MG
K07002	131.782	0.994898	0.368336	2.70106	0.00691188	0.187869	Case/Ctrl	MG
K07494	2436.65	0.00539729	0.155838	0.0346339	0.972372	0.990135	Case/Ctrl	MG
K11665	59.0618	-0.069245	0.363111	-0.190699	0.848761	0.961234	Case/Ctrl	MG
K07775	9953.64	-0.0729887	0.0629373	-1.15971	0.246169	0.613129	Case/Ctrl	MG
K02465	56.2671	0.576958	0.6422	0.898408	0.368968	0.719136	Case/Ctrl	MG
K07999	303.104	-0.00586773	0.501276	-0.0117056	0.990661	0.996586	Case/Ctrl	MG
K13248	385.235	0.30312	0.26723	1.1343	0.256668	0.623112	Case/Ctrl	MG
K03175	64.9984	0.276417	1.09536	0.252353	#N/A	#N/A	Case/Ctrl	MG
K02859	97.0653	-0.485206	0.519107	-0.934694	0.349946	0.70219	Case/Ctrl	MG
K02387	539.872	-0.214099	0.172646	-1.2401	0.214937	0.580316	Case/Ctrl	MG
K02451	82.5436	-0.426829	0.478468	-0.892076	0.372352	0.721754	Case/Ctrl	MG
K14941	23.8542	0.673188	0.715062	0.94144	0.346479	0.699191	Case/Ctrl	MG
K14103	15.4779	1.14	0.866692	1.31535	0.188393	0.55417	Case/Ctrl	MG
K14380	7.31969	0.529008	0.658498	0.803356	0.421769	#N/A	Case/Ctrl	MG
K12271	21.0817	0.596848	0.683766	0.872884	0.382726	0.727392	Case/Ctrl	MG
K13829	2599.15	-0.0765085	0.107305	-0.713002	0.475845	0.790055	Case/Ctrl	MG
K01146	63.2461	1.02921	0.813856	1.26461	0.206013	0.571672	Case/Ctrl	MG
K13275	1730.85	-0.165738	0.154356	-1.07374	0.28294	0.643749	Case/Ctrl	MG
K07509	72.719	1.45231	0.801472	1.81205	0.0699781	0.349387	Case/Ctrl	MG
K02349	104.834	0.307463	0.431081	0.713237	0.475699	0.790055	Case/Ctrl	MG
K15892	25.1603	0.342348	0.772681	0.443066	0.657718	0.883663	Case/Ctrl	MG
K03709	5596.87	0.00706807	0.0616255	0.114694	0.908688	0.974068	Case/Ctrl	MG
K07029	13253	0.00152693	0.0292435	0.0522143	0.958358	0.985438	Case/Ctrl	MG
K03446	7620.79	0.181607	0.123725	1.46783	0.142151	0.489265	Case/Ctrl	MG
K15866	522.823	-0.0918933	0.156585	-0.58686	0.557297	0.836003	Case/Ctrl	MG
K15779	489.163	-0.0965314	0.194218	-0.497027	0.61917	0.868322	Case/Ctrl	MG
K03475	930.327	0.0536084	0.177375	0.302232	0.762475	0.923791	Case/Ctrl	MG
K09136	377.257	0.810275	0.308386	2.62747	0.00860232	0.194986	Case/Ctrl	MG
K06187	6582.92	0.0142843	0.0326919	0.436938	0.662156	0.885636	Case/Ctrl	MG
K00087	6029.29	-0.0147664	0.114864	-0.128555	0.89771	0.970066	Case/Ctrl	MG
K15792	187.912	-0.142981	0.211848	-0.674919	0.499727	0.804115	Case/Ctrl	MG
K06378	2888.89	-0.0176597	0.0793164	-0.222649	0.823809	0.950752	Case/Ctrl	MG
K02912	20.7006	0.474396	0.659111	0.719751	0.471678	0.788644	Case/Ctrl	MG
K15302	12.1804	0.605427	0.858289	0.705389	0.480568	0.794424	Case/Ctrl	MG
K08169	1806.06	0.178267	0.129544	1.37611	0.168789	0.531264	Case/Ctrl	MG
K11434	15.1787	-0.0147172	0.938969	-0.0156738	0.987495	0.995555	Case/Ctrl	MG
K08196	16.4682	0.850585	0.766392	1.10986	0.267061	0.629721	Case/Ctrl	MG
K01268	181.139	-0.0124655	0.194122	-0.0642147	0.948799	0.983572	Case/Ctrl	MG
K05966	63.0432	0.365977	0.42166	0.867944	0.385425	0.729457	Case/Ctrl	MG
K09656	62.825	1.01559	0.592796	1.71322	0.086672	0.384118	Case/Ctrl	MG
K10530	97.8436	0.66108	0.587398	1.12544	0.260404	0.625208	Case/Ctrl	MG
K13601	21.4341	0.724228	0.675281	1.07248	0.283503	0.644125	Case/Ctrl	MG
K08589	966.712	0.317521	0.454995	0.697857	0.485267	0.796202	Case/Ctrl	MG
K12241	101.337	-0.963684	0.780496	-1.23471	0.216939	0.581152	Case/Ctrl	MG
K03521	6148.06	0.00588312	0.0413333	0.142334	0.886816	0.967279	Case/Ctrl	MG
K03880	8.88594	-0.421458	0.819466	-0.514308	0.607037	0.864883	Case/Ctrl	MG
K16165	55.6929	-0.0489058	0.22526	-0.217108	0.828124	0.951334	Case/Ctrl	MG
K06320	2610.47	-0.516424	0.218814	-2.36011	0.0182698	0.225357	Case/Ctrl	MG
K02288	396.774	0.158402	0.228909	0.691989	0.488944	0.797763	Case/Ctrl	MG
K05996	60.6014	-0.212475	0.517583	-0.410515	0.681429	0.892728	Case/Ctrl	MG
K14619	262.867	1.0958	0.674571	1.62443	0.104283	0.423868	Case/Ctrl	MG
K02398	468.253	-0.290582	0.167263	-1.73728	0.0823381	0.372764	Case/Ctrl	MG
K15897	484.868	-0.0337817	0.211429	-0.159778	0.873056	0.967093	Case/Ctrl	MG
K02586	224.419	0.0489244	0.20358	0.24032	0.810082	0.944651	Case/Ctrl	MG
K02433	7365.44	-0.000659766	0.0572966	-0.0115149	0.990813	0.996586	Case/Ctrl	MG
K08995	34.8771	0.108122	0.666565	0.162208	0.871142	0.966309	Case/Ctrl	MG
K08162	421.224	0.423197	0.271743	1.55734	0.119389	0.449762	Case/Ctrl	MG
K00064	465.144	0.0138916	0.229258	0.0605939	0.951683	0.984041	Case/Ctrl	MG
K09800	11234.2	-0.00503894	0.140511	-0.0358615	0.971393	0.989797	Case/Ctrl	MG
K13748	7.83221	-0.595228	0.685947	-0.867746	0.385533	#N/A	Case/Ctrl	MG
K06983	72.0886	-0.0899737	0.761756	-0.118113	0.905978	0.973688	Case/Ctrl	MG
K14724	25.2851	-1.84031	0.976947	-1.88374	0.0596006	0.330776	Case/Ctrl	MG
K01062	98.7391	1.20548	0.561618	2.14645	0.0318375	0.256683	Case/Ctrl	MG
K03524	10793.6	-0.0426931	0.0323811	-1.31846	0.18735	0.553253	Case/Ctrl	MG
K10424	21.5002	0.26817	0.609343	0.440097	0.659867	0.884552	Case/Ctrl	MG
K00760	5280.51	0.00722273	0.0247682	0.291613	0.770583	0.927872	Case/Ctrl	MG
K08315	268.573	-0.260717	0.187882	-1.38766	0.165239	0.527449	Case/Ctrl	MG
K03978	5657.35	-0.00307509	0.0245415	-0.125302	0.900285	0.97139	Case/Ctrl	MG
K07732	114.978	0.0469215	0.314075	0.149396	0.881241	0.967279	Case/Ctrl	MG
K00674	748.943	0.491611	0.18286	2.68846	0.00717825	0.187869	Case/Ctrl	MG
K04077	14581.5	-0.00804733	0.0264334	-0.304438	0.760794	0.923323	Case/Ctrl	MG
K08680	2341.97	-0.0345091	0.112656	-0.306323	0.759359	0.923148	Case/Ctrl	MG
K06916	131.909	0.744611	0.648824	1.14763	0.25112	0.618107	Case/Ctrl	MG
K11614	179.948	-0.522287	0.264034	-1.97811	0.0479163	0.299019	Case/Ctrl	MG
K02653	3691.7	-0.00390519	0.0865884	-0.0451006	0.964027	0.988469	Case/Ctrl	MG
K10947	8169.39	0.0803079	0.0597872	1.34323	0.179197	0.545097	Case/Ctrl	MG
K01091	24334.2	-0.0200206	0.021501	-0.931145	0.351778	0.703596	Case/Ctrl	MG
K03296	46684.1	0.213162	0.0940038	2.26759	0.0233545	0.23988	Case/Ctrl	MG
K04786	429.201	0.0488496	0.428099	0.114108	0.909152	0.974278	Case/Ctrl	MG
K11528	368.388	-0.236886	0.218515	-1.08407	0.278332	0.640041	Case/Ctrl	MG
K03357	22.8391	-0.0965677	0.957591	-0.100844	0.919674	0.977241	Case/Ctrl	MG
K03810	535.364	0.259313	0.160687	1.61378	0.106575	0.426774	Case/Ctrl	MG
K10537	150.675	1.00538	0.379194	2.65137	0.00801666	0.190053	Case/Ctrl	MG
K03074	1729.24	0.0471722	0.100436	0.469675	0.638587	0.878057	Case/Ctrl	MG
K03971	20.1605	1.75244	0.846034	2.07136	0.0383255	0.274476	Case/Ctrl	MG
K01278	10278.5	-0.0862085	0.119241	-0.722978	0.469693	0.787148	Case/Ctrl	MG
K11022	1058.75	0.0707517	0.157704	0.448636	0.653694	0.883491	Case/Ctrl	MG
K03350	1200.74	-0.0467784	0.163161	-0.286701	0.774341	0.928153	Case/Ctrl	MG
K08153	7387.5	0.036884	0.0906093	0.407067	0.683959	0.893366	Case/Ctrl	MG
K00353	8773.78	-0.0419195	0.0373766	-1.12154	0.262056	0.625343	Case/Ctrl	MG
K00676	17150.3	0.0234452	0.0493266	0.475304	0.63457	0.875771	Case/Ctrl	MG
K05119	125.258	0.285866	0.480409	0.595047	0.551812	0.832426	Case/Ctrl	MG
K07486	36625.9	-0.036901	0.0719111	-0.513148	0.607848	0.865084	Case/Ctrl	MG
K06657	33.8166	0.234849	0.737028	0.318644	0.749997	0.919333	Case/Ctrl	MG
K14428	47.9752	0.738856	0.681122	1.08476	0.278027	0.639889	Case/Ctrl	MG
K00217	4.75219	0.648424	0.550306	1.1783	0.238679	#N/A	Case/Ctrl	MG
K06438	5697.17	-0.0199583	0.0857178	-0.232837	0.815888	0.947156	Case/Ctrl	MG
K07778	6370.65	0.0435439	0.0993588	0.438249	0.661206	0.885345	Case/Ctrl	MG
K08170	33.5361	-0.52371	0.641455	-0.816442	0.414248	0.747244	Case/Ctrl	MG
K01228	331.659	-0.0526528	0.367055	-0.143446	0.885938	0.967279	Case/Ctrl	MG
K02008	15994.8	-0.00455881	0.0484391	-0.0941143	0.925018	0.977241	Case/Ctrl	MG
K10962	44.9224	0.360907	0.624811	0.577625	0.563517	0.837809	Case/Ctrl	MG
K05625	67.3912	-0.538113	0.717607	-0.749872	0.453332	0.777055	Case/Ctrl	MG
K02791	2454.6	-0.00347285	0.123806	-0.0280507	0.977622	0.992213	Case/Ctrl	MG
K03798	31733.5	-0.0453375	0.0349676	-1.29656	0.194784	0.562655	Case/Ctrl	MG
K07168	906.825	-0.0352426	0.0882301	-0.399439	0.68957	0.895655	Case/Ctrl	MG
K00647	2319.58	0.098695	0.177491	0.556056	0.578173	0.845946	Case/Ctrl	MG
K15137	235.42	0.817749	0.478336	1.70957	0.0873452	0.385612	Case/Ctrl	MG
K07101	179.231	0.698264	0.250206	2.79076	0.00525844	0.17751	Case/Ctrl	MG
K16257	28.2232	1.24239	0.949572	1.30836	0.19075	0.556572	Case/Ctrl	MG
K04018	358.209	-0.156597	0.260506	-0.601126	0.547756	0.828836	Case/Ctrl	MG
K06880	500.514	0.326811	0.224963	1.45274	0.146297	0.496157	Case/Ctrl	MG
K15261	6225.79	0.0365462	0.0596333	0.612849	0.539976	0.82611	Case/Ctrl	MG
K10823	3643.27	-0.156275	0.0947005	-1.6502	0.0989012	0.413285	Case/Ctrl	MG
K05778	90.3466	1.15733	0.516066	2.2426	0.0249224	0.241212	Case/Ctrl	MG
K11192	103.089	1.22835	0.60487	2.03077	0.0422779	0.287469	Case/Ctrl	MG
K03306	6236.92	0.14845	0.0969396	1.53137	0.125678	0.459816	Case/Ctrl	MG
K15157	33.2289	-0.34212	0.851298	-0.40188	0.687772	0.894762	Case/Ctrl	MG
K01653	6108.28	-0.0286178	0.0453862	-0.63054	0.528341	0.820862	Case/Ctrl	MG
K04338	26.6076	2.41711	0.908165	2.66153	0.00777865	0.188766	Case/Ctrl	MG
K12136	185.861	-0.0394162	0.237896	-0.165687	0.868403	0.96566	Case/Ctrl	MG
K08261	21.1405	0.887683	0.993398	0.893583	0.371545	0.72109	Case/Ctrl	MG
K12811	8.15943	-0.188451	0.906438	-0.207903	0.835305	0.953913	Case/Ctrl	MG
K06714	825.626	0.294017	0.17374	1.69228	0.0905923	0.393387	Case/Ctrl	MG
K02340	8651.08	-0.0015171	0.0284574	-0.0533113	0.957484	0.985059	Case/Ctrl	MG
K02015	12634.8	0.00188262	0.0444021	0.0423993	0.96618	0.988469	Case/Ctrl	MG
K05979	195.871	0.393517	0.318226	1.2366	0.216237	0.580972	Case/Ctrl	MG
K00484	2010.64	-0.0163421	0.114102	-0.143224	0.886113	0.967279	Case/Ctrl	MG
K14680	275.923	-0.443156	0.369819	-1.1983	0.230799	0.59586	Case/Ctrl	MG
K01465	11052.4	0.00333512	0.0305953	0.109007	0.913197	0.975556	Case/Ctrl	MG
K14067	26.3107	-0.422159	0.616713	-0.684532	0.493639	0.800626	Case/Ctrl	MG
K00998	3099.4	-0.0617743	0.0604623	-1.0217	0.306922	0.664787	Case/Ctrl	MG
K13641	3573.07	0.162915	0.0941474	1.73042	0.0835549	0.376714	Case/Ctrl	MG
K09690	5328.81	0.051033	0.0684719	0.745312	0.456083	0.779466	Case/Ctrl	MG
K12339	252.257	0.611061	0.244207	2.50222	0.0123416	0.211351	Case/Ctrl	MG
K01179	5202.06	-0.164583	0.160707	-1.02412	0.305778	0.664171	Case/Ctrl	MG
K15547	271.042	1.24072	0.617813	2.00825	0.044617	0.291888	Case/Ctrl	MG
K04485	11632.1	0.0172375	0.0281898	0.611482	0.54088	0.82611	Case/Ctrl	MG
K03650	15798.1	-0.0292569	0.0247393	-1.18261	0.236966	0.60312	Case/Ctrl	MG
K12614	30.6045	-1.97438	0.962484	-2.05134	#N/A	#N/A	Case/Ctrl	MG
K08352	3019.89	-0.0273809	0.15639	-0.175081	0.861016	0.963101	Case/Ctrl	MG
K08309	5321.27	-0.0393197	0.058035	-0.677518	0.498078	0.803251	Case/Ctrl	MG
K06972	10132.2	-0.207633	0.0975915	-2.12757	0.0333725	0.264	Case/Ctrl	MG
K10555	235.684	0.280884	0.238356	1.17842	0.23863	0.604411	Case/Ctrl	MG
K03817	657.31	0.865472	0.227581	3.80292	0.000143	0.0389398	Case/Ctrl	MG
K03070	24648.6	-0.0091078	0.0242524	-0.375542	0.707257	0.904012	Case/Ctrl	MG
K07252	602.334	-0.139166	0.202693	-0.686583	0.492346	0.799631	Case/Ctrl	MG
K03563	990.318	-0.341419	0.194721	-1.75338	0.0795375	0.365743	Case/Ctrl	MG
K05788	3664.71	-0.064848	0.17779	-0.364746	0.715301	0.906446	Case/Ctrl	MG
K09116	494.545	0.159883	0.150714	1.06084	0.288764	0.649718	Case/Ctrl	MG
K02932	27.1145	0.398326	0.691625	0.575928	0.564664	0.838958	Case/Ctrl	MG
K10716	3524.04	0.193639	0.0979543	1.97683	0.0480612	0.299028	Case/Ctrl	MG
K07130	1911.99	0.0725605	0.0855775	0.847893	0.396498	0.734733	Case/Ctrl	MG
K01692	319.14	0.00723328	0.123502	0.058568	0.953296	0.984041	Case/Ctrl	MG
K13591	23.6086	0.503943	0.464058	1.08595	0.277502	0.639556	Case/Ctrl	MG
K03783	4351.28	-0.0349019	0.0367018	-0.950958	0.341626	0.69342	Case/Ctrl	MG
K10144	52.8108	-0.0248437	0.452458	-0.0549084	0.956211	0.985059	Case/Ctrl	MG
K05713	59.1451	1.83494	0.992003	1.84973	0.0643521	0.337924	Case/Ctrl	MG
K14955	49.8816	-0.591606	0.582977	-1.0148	0.3102	0.667818	Case/Ctrl	MG
K12207	7.88459	0.261556	0.78198	0.334479	0.738018	#N/A	Case/Ctrl	MG
K15668	5.4353	-0.0383207	0.766801	-0.0499747	0.960143	#N/A	Case/Ctrl	MG
K02902	3273.28	0.0228543	0.0383139	0.596502	0.55084	0.832007	Case/Ctrl	MG
K06327	25.6166	2.69126	0.815173	3.30146	0.000961835	0.0966429	Case/Ctrl	MG
K16074	80.2854	0.956725	0.480881	1.98953	0.0466432	0.295392	Case/Ctrl	MG
K14294	139.298	-0.0740796	0.603285	-0.122794	0.902271	0.972009	Case/Ctrl	MG
K03600	74.0071	0.635497	0.278985	2.27789	0.0227333	0.237116	Case/Ctrl	MG
K03726	2524.81	0.206758	0.145659	1.41946	0.155764	0.50994	Case/Ctrl	MG
K03338	562.268	-0.280074	0.14232	-1.96792	0.0490775	0.302555	Case/Ctrl	MG
K01840	5461.16	0.0197954	0.0704131	0.281132	0.778609	0.930351	Case/Ctrl	MG
K08495	71.287	-0.199588	0.354914	-0.562357	0.573873	0.843974	Case/Ctrl	MG
K09470	73.6048	1.67905	1.01723	1.65061	0.0988181	0.413195	Case/Ctrl	MG
K00172	772.562	0.0510562	0.123412	0.413705	0.679091	0.891927	Case/Ctrl	MG
K02393	114.763	0.685322	0.452521	1.51445	0.129911	0.46768	Case/Ctrl	MG
K03331	16.0208	-0.953651	0.580798	-1.64197	0.100597	0.416238	Case/Ctrl	MG
K07569	13.0785	1.08257	0.870119	1.24416	0.213441	0.578689	Case/Ctrl	MG
K06398	7432.06	-0.0141498	0.0839365	-0.168577	0.866129	0.96566	Case/Ctrl	MG
K02883	22.2749	0.0409075	0.679354	0.0602152	0.951984	0.984041	Case/Ctrl	MG
K06709	24.993	-0.660791	0.963507	-0.685819	0.492827	0.800028	Case/Ctrl	MG
K15530	3313.83	-0.385291	0.158768	-2.42675	0.0152346	0.217991	Case/Ctrl	MG
K14464	19.7536	0.418495	0.694038	0.602985	0.546518	0.828523	Case/Ctrl	MG
K09252	139.216	-0.347286	0.371468	-0.934903	0.349838	0.70219	Case/Ctrl	MG
K09897	40.786	1.68212	0.714903	2.35293	0.0186261	0.225357	Case/Ctrl	MG
K12855	66.0686	-0.836331	0.63448	-1.31814	0.187458	0.553253	Case/Ctrl	MG
K08476	85.9477	0.0256113	0.418207	0.0612407	0.951167	0.984041	Case/Ctrl	MG
K11214	769.908	-0.203453	0.139758	-1.45575	0.145461	0.495318	Case/Ctrl	MG
K13896	227.336	0.334293	0.347472	0.962073	0.336013	0.689083	Case/Ctrl	MG
K06023	5714.45	0.0299912	0.0627125	0.478234	0.632484	0.875207	Case/Ctrl	MG
K15022	7329.33	-0.101352	0.123741	-0.819062	0.412751	0.745543	Case/Ctrl	MG
K00783	5303.01	-0.0223125	0.0266471	-0.837333	0.402405	0.737542	Case/Ctrl	MG
K01409	11800.5	0.00673563	0.0392675	0.171532	0.863806	0.965093	Case/Ctrl	MG
K03481	5852.68	-0.0676875	0.0931436	-0.7267	0.46741	0.78701	Case/Ctrl	MG
K12248	168.246	0.866256	0.389684	2.22297	0.0262179	0.2448	Case/Ctrl	MG
K14446	12.4147	-0.6236	0.827697	-0.753415	0.451201	0.775916	Case/Ctrl	MG
K01761	1302.39	0.233253	0.170046	1.3717	0.170156	0.533669	Case/Ctrl	MG
K09384	2973.65	0.0551258	0.129717	0.424971	0.670858	0.890246	Case/Ctrl	MG
K10038	88.4938	0.413317	0.370964	1.11417	0.265206	0.627765	Case/Ctrl	MG
K06195	108.805	0.766095	0.354082	2.16361	0.0304944	0.253179	Case/Ctrl	MG
K01232	1771.06	0.018847	0.126407	0.149098	0.881476	0.967279	Case/Ctrl	MG
K00958	21.6789	-0.624607	0.618015	-1.01067	0.312176	0.670042	Case/Ctrl	MG
K13141	106.865	-0.356444	0.558873	-0.637791	0.52361	0.817132	Case/Ctrl	MG
K08971	44.815	0.820624	0.773767	1.06056	0.288891	0.649788	Case/Ctrl	MG
K05661	18.1652	0.606878	0.703511	0.862642	0.388334	0.729706	Case/Ctrl	MG
K06212	1898.79	-0.0407543	0.091727	-0.4443	0.656826	0.883663	Case/Ctrl	MG
K08361	79.5782	1.73772	0.84824	2.04861	0.0404998	0.281397	Case/Ctrl	MG
K12294	8.56043	0.886656	0.886478	1.0002	0.317213	0.675754	Case/Ctrl	MG
K00860	963.285	0.264092	0.150447	1.75538	0.0791939	0.365743	Case/Ctrl	MG
K06162	270.102	0.307814	0.232744	1.32254	0.185987	0.550774	Case/Ctrl	MG
K09861	3723.2	-0.0343077	0.09546	-0.359394	0.7193	0.908137	Case/Ctrl	MG
K07041	184.833	0.503083	0.400235	1.25697	0.208765	0.572933	Case/Ctrl	MG
K01216	324.031	-0.028299	0.253648	-0.111568	0.911166	0.974831	Case/Ctrl	MG
K07267	834.318	-0.0251736	0.270564	-0.0930412	0.925871	0.97726	Case/Ctrl	MG
K10875	17529.2	0.0263953	0.116076	0.227398	0.820114	0.948953	Case/Ctrl	MG
K01989	10078.9	-0.0422464	0.0468475	-0.901784	0.367171	0.71792	Case/Ctrl	MG
K11089	102.823	-1.15531	0.672661	-1.71752	0.0858847	0.382898	Case/Ctrl	MG
K03324	20837.6	-0.110866	0.0360205	-3.07787	0.00208487	0.129761	Case/Ctrl	MG
K08724	571.357	0.231099	0.234236	0.986604	0.323837	0.679996	Case/Ctrl	MG
K06998	659.665	0.124783	0.177121	0.704511	0.481115	0.794424	Case/Ctrl	MG
K02494	268.435	0.360378	0.191264	1.88419	0.0595394	0.330709	Case/Ctrl	MG
K04883	11.6191	-0.663063	0.765798	-0.865846	0.386574	0.729706	Case/Ctrl	MG
K03686	16298.2	-0.0386687	0.0366088	-1.05627	0.290845	0.651145	Case/Ctrl	MG
K12571	237.382	0.475936	0.359569	1.32363	0.185626	0.550741	Case/Ctrl	MG
K00079	14.0639	-1.54667	0.778599	-1.98648	0.0469796	0.296355	Case/Ctrl	MG
K14115	45.2305	0.908466	0.82598	1.09986	0.271391	0.634377	Case/Ctrl	MG
K00856	1080.92	0.247131	0.167356	1.47668	0.139762	0.48499	Case/Ctrl	MG
K06873	296.38	-0.113181	0.172625	-0.655645	0.512052	0.811473	Case/Ctrl	MG
K03824	1528.16	0.0951651	0.107415	0.885954	0.375642	0.722934	Case/Ctrl	MG
K07010	3583.22	-0.00867036	0.07643	-0.113442	0.90968	0.974533	Case/Ctrl	MG
K03439	7200.96	-0.0387705	0.0293076	-1.32288	0.185875	0.550774	Case/Ctrl	MG
K07017	3890.71	-0.0448778	0.0671324	-0.668498	0.503816	0.805846	Case/Ctrl	MG
K05775	76.7202	1.58766	0.798841	1.98745	0.0468723	0.296286	Case/Ctrl	MG
K02750	147.681	0.302499	0.567532	0.533008	#N/A	#N/A	Case/Ctrl	MG
K07060	1207.12	0.211993	0.150832	1.40549	0.159874	0.516802	Case/Ctrl	MG
K03105	11.9133	0.600227	0.745277	0.805375	0.420603	0.75345	Case/Ctrl	MG
K06404	1172.09	-0.180788	0.131017	-1.37988	0.167624	0.530513	Case/Ctrl	MG
K02676	32.0716	-0.54787	1.03093	-0.531435	0.595117	0.85611	Case/Ctrl	MG
K06172	151.22	-0.159407	0.347451	-0.45879	0.646385	0.880966	Case/Ctrl	MG
K01662	18556.1	-0.00770191	0.0274473	-0.280607	0.779012	0.93044	Case/Ctrl	MG
K14317	39.7038	-0.262855	0.98533	-0.266769	0.789647	0.936559	Case/Ctrl	MG
K02194	309.396	0.166865	0.204293	0.816792	0.414047	0.747083	Case/Ctrl	MG
K12842	16.1041	0.339307	0.903596	0.375508	0.707283	0.904012	Case/Ctrl	MG
K00549	7073.14	0.0236162	0.0797394	0.296167	0.767103	0.925472	Case/Ctrl	MG
K13300	27.439	0.438839	0.58251	0.753358	0.451235	0.775916	Case/Ctrl	MG
K02137	36.4809	-1.83999	0.6689	-2.75077	#N/A	#N/A	Case/Ctrl	MG
K00114	471.575	0.768725	0.21997	3.49468	0.000474634	0.0745715	Case/Ctrl	MG
K01783	7974.95	0.036717	0.0266134	1.37964	0.167696	0.530513	Case/Ctrl	MG
K06520	28.3676	-0.586415	0.839477	-0.698548	0.484834	0.795969	Case/Ctrl	MG
K11686	158.521	-0.928313	0.323992	-2.86524	0.00416698	0.163094	Case/Ctrl	MG
K11748	698.747	0.495468	0.176053	2.81432	0.00488813	0.173105	Case/Ctrl	MG
K01207	8255.66	0.163356	0.0626276	2.60837	0.00909755	0.198079	Case/Ctrl	MG
K13661	4.97956	0.0384266	0.722347	0.0531969	0.957575	#N/A	Case/Ctrl	MG
K08682	174.267	0.777165	0.308897	2.51593	0.0118718	0.210698	Case/Ctrl	MG
K12349	420.485	0.159461	0.263999	0.604021	0.54583	0.827969	Case/Ctrl	MG
K05803	529.664	-0.0632464	0.341133	-0.185401	0.852914	0.961547	Case/Ctrl	MG
K01623	98.7389	0.401801	0.370747	1.08376	0.278471	0.640041	Case/Ctrl	MG
K03743	2948.08	0.0494074	0.0533032	0.926913	0.353972	0.705886	Case/Ctrl	MG
K10750	991.882	-0.54605	0.244195	-2.23612	0.0253437	0.242631	Case/Ctrl	MG
K08326	69.532	1.52374	0.499748	3.04902	0.00229587	0.129761	Case/Ctrl	MG
K06416	497.146	-0.0247175	0.147015	-0.16813	0.866481	0.96566	Case/Ctrl	MG
K10879	78.5741	0.772418	0.601961	1.28317	0.199433	0.568563	Case/Ctrl	MG
K09012	252.971	0.224104	0.199978	1.12064	0.26244	0.625343	Case/Ctrl	MG
K08311	142.061	0.858243	0.300181	2.85908	0.00424871	0.164471	Case/Ctrl	MG
K02680	55.5725	0.754572	0.593365	1.27168	0.203486	0.569592	Case/Ctrl	MG
K02371	6112.09	-0.0312075	0.0552519	-0.564822	0.572195	0.842339	Case/Ctrl	MG
K08255	1388.08	-0.0747242	0.129957	-0.57499	0.565298	0.839184	Case/Ctrl	MG
K02224	5811.47	-0.101156	0.0570359	-1.77355	0.0761373	0.359941	Case/Ctrl	MG
K09153	2883.24	-0.0923421	0.067106	-1.37606	0.168802	0.531264	Case/Ctrl	MG
K04559	36.8745	-0.85729	0.453936	-1.88857	0.0589496	0.329248	Case/Ctrl	MG
K07719	181.428	0.191969	0.176743	1.08615	0.277415	0.639556	Case/Ctrl	MG
K01584	1221.95	0.79553	0.267071	2.97872	0.00289458	0.136585	Case/Ctrl	MG
K13670	167.3	0.385542	0.301061	1.28061	0.200331	0.56872	Case/Ctrl	MG
K09789	633.571	0.356274	0.201756	1.76587	0.0774182	0.362014	Case/Ctrl	MG
K04520	179.76	-0.446554	0.334099	-1.33659	0.181357	0.545097	Case/Ctrl	MG
K01554	884.018	-0.0837824	0.11244	-0.745129	0.456194	0.779466	Case/Ctrl	MG
K09806	40.7693	1.65296	0.748361	2.20877	0.0271904	0.2448	Case/Ctrl	MG
K01520	7206.45	0.118239	0.0714023	1.65595	0.0977319	0.411101	Case/Ctrl	MG
K07118	750.394	0.34197	0.163684	2.08921	0.0366886	0.270523	Case/Ctrl	MG
K09960	385.761	-0.224875	0.243474	-0.923608	0.355691	0.706852	Case/Ctrl	MG
K01142	5509.16	-0.0175238	0.0478606	-0.366142	0.714259	0.906446	Case/Ctrl	MG
K06878	177.019	0.345508	0.22401	1.54237	0.122983	0.455698	Case/Ctrl	MG
K03311	3770.39	-0.0194674	0.134412	-0.144834	0.884842	0.967279	Case/Ctrl	MG
K10615	2013.72	-0.0883409	0.297354	-0.297089	0.766398	0.925341	Case/Ctrl	MG
K13448	414.265	0.278082	0.306524	0.907212	0.364295	0.71437	Case/Ctrl	MG
K06333	1809.52	0.0414443	0.0975683	0.424773	0.671002	0.890262	Case/Ctrl	MG
K03628	9435.2	0.0177201	0.0416305	0.425651	0.670362	0.890246	Case/Ctrl	MG
K05338	40.5291	-0.559667	0.477015	-1.17327	0.240687	0.605949	Case/Ctrl	MG
K09697	468.302	-0.306776	0.203791	-1.50534	0.132236	0.47201	Case/Ctrl	MG
K00033	2448.75	0.180503	0.152317	1.18504	0.236001	0.601408	Case/Ctrl	MG
K01103	41.3106	-0.646709	0.396425	-1.63135	0.102816	0.421532	Case/Ctrl	MG
K12880	241.51	-0.454154	0.505757	-0.89797	0.369202	0.719174	Case/Ctrl	MG
K15193	122.729	-0.983822	0.569215	-1.72838	0.0839197	0.377386	Case/Ctrl	MG
K06674	5144.87	-0.113927	0.138821	-0.820672	0.411833	0.744863	Case/Ctrl	MG
K01055	3858.4	0.140775	0.0730095	1.92817	0.0538344	0.317627	Case/Ctrl	MG
K05020	194.113	-0.468979	0.248406	-1.88796	0.0590319	0.329248	Case/Ctrl	MG
K05566	335.351	0.0176594	0.188661	0.0936038	0.925424	0.977241	Case/Ctrl	MG
K00835	221.305	1.02687	0.382258	2.68633	0.00722413	0.187869	Case/Ctrl	MG
K02454	534.294	0.429039	0.23448	1.82975	0.067288	0.34369	Case/Ctrl	MG
K03119	70.512	1.80797	0.836019	2.1626	0.0305719	0.253179	Case/Ctrl	MG
K12140	285.054	0.0148609	0.215418	0.0689862	0.945001	0.982049	Case/Ctrl	MG
K11963	69.661	0.575197	0.510623	1.12646	0.259971	0.625208	Case/Ctrl	MG
K06138	1836.91	-0.0605706	0.101579	-0.596291	0.550981	0.832033	Case/Ctrl	MG
K09945	38.9568	-0.553966	0.879365	-0.629961	0.52872	0.820965	Case/Ctrl	MG
K12994	3711.54	0.219059	0.115083	1.90349	0.0569762	0.323165	Case/Ctrl	MG
K01960	8235.87	-0.00258747	0.0809615	-0.0319592	0.974505	0.99077	Case/Ctrl	MG
K13533	113.15	0.196487	0.322988	0.608341	0.542961	0.826679	Case/Ctrl	MG
K08286	271.453	-0.151257	0.317226	-0.476811	0.633497	0.875223	Case/Ctrl	MG
K09777	1453.51	-0.00119369	0.0724785	-0.0164696	0.98686	0.995555	Case/Ctrl	MG
K12448	14.8932	-2.06492	0.898752	-2.29755	#N/A	#N/A	Case/Ctrl	MG
K01899	22.3098	0.757824	0.519613	1.45844	0.144719	0.493292	Case/Ctrl	MG
K02575	1297.05	0.152416	0.176693	0.862605	0.388354	0.729706	Case/Ctrl	MG
K12378	18.8411	-2.17625	0.946008	-2.30046	0.0214223	0.231401	Case/Ctrl	MG
K07396	57.6993	-0.0240072	0.412643	-0.0581791	0.953606	0.984041	Case/Ctrl	MG
K03802	518.247	-0.103219	0.175533	-0.588034	0.55651	0.835276	Case/Ctrl	MG
K02356	6380.73	0.0287313	0.0293401	0.979249	0.327457	0.683542	Case/Ctrl	MG
K07743	80.1143	-0.1907	0.381932	-0.499304	0.617565	0.867762	Case/Ctrl	MG
K02881	4622.62	-0.0139533	0.0243191	-0.57376	0.56613	0.839654	Case/Ctrl	MG
K16210	608.294	0.0593445	0.256193	0.23164	0.816818	0.947268	Case/Ctrl	MG
K00394	3034.28	-0.0743042	0.129491	-0.573816	0.566092	0.839654	Case/Ctrl	MG
K05386	152.28	0.102524	0.236068	0.434299	0.664071	0.886114	Case/Ctrl	MG
K15140	36.9848	-1.32997	0.888923	-1.49616	0.134612	0.476201	Case/Ctrl	MG
K14683	16.3566	-0.616353	0.804384	-0.766242	0.443533	0.770744	Case/Ctrl	MG
K03750	4992.91	-0.156788	0.0855282	-1.83317	0.0667767	0.341856	Case/Ctrl	MG
K02404	907.052	-0.413497	0.195093	-2.11948	0.0340497	0.266228	Case/Ctrl	MG
K06449	119.6	-0.0751196	0.497288	-0.151059	0.87993	0.967279	Case/Ctrl	MG
K07813	6304.88	-0.121194	0.130755	-0.926875	0.353992	0.705886	Case/Ctrl	MG
K01561	90.3577	-0.168349	0.269801	-0.623977	0.532643	0.822828	Case/Ctrl	MG
K10770	211.38	-0.139044	0.302	-0.460412	0.64522	0.880966	Case/Ctrl	MG
K09704	3910.06	0.329497	0.134564	2.44863	0.0143401	0.217291	Case/Ctrl	MG
K00244	14907.5	0.0989757	0.119117	0.830908	0.406026	0.739947	Case/Ctrl	MG
K01646	556.1	-0.0449985	0.137441	-0.327403	0.743363	0.917214	Case/Ctrl	MG
K13131	25.185	-0.751946	0.922783	-0.814867	0.415148	0.748067	Case/Ctrl	MG
K05882	9827.29	-0.0380558	0.0823242	-0.462267	0.64389	0.880966	Case/Ctrl	MG
K02395	5761.64	0.0253262	0.102355	0.247435	0.804571	0.943071	Case/Ctrl	MG
K11563	80.5999	0.315009	0.385483	0.817179	0.413826	0.747083	Case/Ctrl	MG
K15011	403.307	-0.545749	0.208658	-2.61551	0.00890932	0.197946	Case/Ctrl	MG
K06909	9638.74	0.0613781	0.0927978	0.661418	0.508344	0.809407	Case/Ctrl	MG
K00586	36.1845	0.862967	0.699458	1.23377	0.21729	0.581861	Case/Ctrl	MG
K04720	7644.36	-0.126818	0.0574385	-2.2079	0.0272515	0.2448	Case/Ctrl	MG
K15272	15.9582	-0.447785	0.889379	-0.503481	0.614626	0.865849	Case/Ctrl	MG
K12222	13.5664	0.0633986	0.744076	0.0852045	0.932099	0.978331	Case/Ctrl	MG
K07773	138.908	0.475898	0.373336	1.27472	0.202409	0.56912	Case/Ctrl	MG
K04798	43.1632	0.721906	0.573397	1.259	0.208031	0.572263	Case/Ctrl	MG
K04755	114.162	0.388189	0.231056	1.68006	0.0929453	0.399558	Case/Ctrl	MG
K00699	696.097	0.375236	0.201592	1.86137	0.0626926	0.333525	Case/Ctrl	MG
K04041	10334.1	-0.109076	0.0839798	-1.29884	0.194	0.562206	Case/Ctrl	MG
K02046	1466.92	0.0143355	0.121149	0.11833	0.905806	0.973688	Case/Ctrl	MG
K05796	669.639	0.103645	0.182244	0.568718	0.569548	0.840367	Case/Ctrl	MG
K09766	670.32	-0.412296	0.185696	-2.22028	0.0264	0.2448	Case/Ctrl	MG
K12524	3371.09	-0.0836878	0.141861	-0.589927	0.55524	0.834533	Case/Ctrl	MG
K13355	57.8009	0.201052	0.289164	0.695288	0.486875	0.79737	Case/Ctrl	MG
K02759	870.55	-0.124973	0.122027	-1.02414	0.305768	0.664171	Case/Ctrl	MG
K13837	180.96	-0.096277	0.282379	-0.34095	0.733141	0.912631	Case/Ctrl	MG
K14988	355.856	-0.406642	0.279236	-1.45627	0.145318	0.495083	Case/Ctrl	MG
K08084	375.053	0.0707306	0.199853	0.353914	0.723403	0.909591	Case/Ctrl	MG
K02965	3986.91	0.0110076	0.0233608	0.471197	0.6375	0.8771	Case/Ctrl	MG
K02380	433.951	0.255512	0.158852	1.60849	0.107728	0.429381	Case/Ctrl	MG
K08320	328.038	0.332241	0.232359	1.42986	0.152757	0.507331	Case/Ctrl	MG
K00335	1033.28	-0.0366482	0.152139	-0.240886	0.809644	0.944304	Case/Ctrl	MG
K14194	4681.91	0.0304064	0.163424	0.186059	0.852399	0.961547	Case/Ctrl	MG
K08973	58.6366	0.0520098	0.612339	0.0849362	0.932312	0.978383	Case/Ctrl	MG
K00847	9647.1	-0.0446933	0.0543973	-0.821608	0.4113	0.744321	Case/Ctrl	MG
K03883	33.5397	-0.480449	0.577577	-0.831835	0.405502	0.739405	Case/Ctrl	MG
K00842	145.914	-0.559294	0.27316	-2.04749	0.0406096	0.281594	Case/Ctrl	MG
K09685	296.735	0.183704	0.229851	0.799231	0.424157	0.755319	Case/Ctrl	MG
K01297	3636.02	0.139068	0.0741877	1.87454	0.0608558	0.331247	Case/Ctrl	MG
K06224	262.041	0.557773	0.460866	1.21027	0.226175	0.591759	Case/Ctrl	MG
K13783	9.9515	0.21223	0.753262	0.281748	0.778137	0.930117	Case/Ctrl	MG
K02100	327.533	-0.0521909	0.373607	-0.139695	0.888901	0.968141	Case/Ctrl	MG
K01903	772.162	0.301306	0.170774	1.76435	0.0776723	0.362363	Case/Ctrl	MG
K01615	325.916	-0.0990322	0.140745	-0.703629	0.481664	0.794553	Case/Ctrl	MG
K06467	41.0547	0.563505	0.644933	0.873742	0.382259	0.727144	Case/Ctrl	MG
K13015	232.996	0.300542	0.250655	1.19903	0.230517	0.595506	Case/Ctrl	MG
K07158	38.797	1.65308	0.674091	2.45231	0.0141942	0.216679	Case/Ctrl	MG
K10934	19.8547	-0.33695	0.876678	-0.384348	0.70072	0.901098	Case/Ctrl	MG
K08534	4.52838	-0.399722	0.828212	-0.482632	#N/A	#N/A	Case/Ctrl	MG
K04483	39.2372	0.899842	0.687436	1.30898	0.19054	0.556252	Case/Ctrl	MG
K02109	7478.37	-0.152586	0.0551101	-2.76874	0.00562735	0.17751	Case/Ctrl	MG
K05782	79.0339	1.18163	0.523941	2.25528	0.0241159	0.241212	Case/Ctrl	MG
K00881	135.218	0.44904	0.278801	1.61061	0.107264	0.42804	Case/Ctrl	MG
K01236	94.8389	-0.202658	0.417455	-0.485461	0.627349	0.871685	Case/Ctrl	MG
K09527	1316.29	0.0812782	0.185946	0.437106	0.662034	0.885636	Case/Ctrl	MG
K10116	27.6846	-0.454338	0.343085	-1.32427	0.185413	0.550741	Case/Ctrl	MG
K06192	297.462	1.12191	0.347051	3.23269	0.00122629	0.104309	Case/Ctrl	MG
K13998	50.9632	-0.136984	0.367375	-0.372871	0.709244	0.904972	Case/Ctrl	MG
K13659	36.1223	0.210036	0.556479	0.377438	0.705848	0.90317	Case/Ctrl	MG
K06199	2492.95	0.0616504	0.113686	0.542288	0.58762	0.85372	Case/Ctrl	MG
K06943	40.0011	0.775421	0.688532	1.12619	0.260083	0.625208	Case/Ctrl	MG
K02358	13257	0.0181198	0.0320679	0.565046	0.572043	0.842299	Case/Ctrl	MG
K04773	3927.22	0.000117954	0.106011	0.00111265	0.999112	0.999369	Case/Ctrl	MG
K10188	8032.64	-0.114453	0.088814	-1.28869	0.197507	0.566276	Case/Ctrl	MG
K06179	5961.31	-0.00120874	0.062915	-0.0192123	0.984672	0.995376	Case/Ctrl	MG
K13500	898.501	-0.069892	0.159318	-0.438695	0.660883	0.885211	Case/Ctrl	MG
K00853	7941.46	0.0561358	0.0553119	1.0149	0.310156	0.667818	Case/Ctrl	MG
K10006	426.274	-0.163587	0.262431	-0.623353	0.533053	0.822828	Case/Ctrl	MG
K06931	263.683	-0.241973	0.547892	-0.441644	0.658747	0.883988	Case/Ctrl	MG
K03545	20345.7	-0.0597966	0.0378164	-1.58123	0.113825	0.441144	Case/Ctrl	MG
K13499	13.0947	0.331707	0.7337	0.452102	0.651195	0.882976	Case/Ctrl	MG
K16294	54.9107	0.242806	0.320708	0.757093	0.448994	0.774398	Case/Ctrl	MG
K13693	55.2666	0.919497	0.847134	1.08542	0.277735	0.639655	Case/Ctrl	MG
K00694	681.733	0.655051	0.215916	3.03382	0.00241479	0.131708	Case/Ctrl	MG
K13195	176.437	0.0446251	0.305314	0.146161	0.883794	0.967279	Case/Ctrl	MG
K00579	29.3499	0.690364	0.727644	0.948766	0.34274	0.694755	Case/Ctrl	MG
K02364	6266.72	0.131352	0.0920319	1.42724	0.153509	0.508576	Case/Ctrl	MG
K13934	45.7534	-0.236217	0.523532	-0.451198	0.651847	0.882976	Case/Ctrl	MG
K11066	130.421	0.702121	0.333659	2.1043	0.0353519	0.267172	Case/Ctrl	MG
K00001	366.719	0.0540894	0.201223	0.268803	0.788081	0.935378	Case/Ctrl	MG
K09749	1549.71	-0.260554	0.174348	-1.49445	0.135059	0.477278	Case/Ctrl	MG
K12685	3693.03	0.709914	0.256627	2.76633	0.00566914	0.17751	Case/Ctrl	MG
K02443	1162.46	-0.0590408	0.0938783	-0.628908	0.52941	0.821202	Case/Ctrl	MG
K11474	50.7873	2.20353	0.962369	2.28969	0.0220394	0.233808	Case/Ctrl	MG
K06548	26.1514	0.551888	0.718218	0.768412	0.442242	0.770491	Case/Ctrl	MG
K13713	63.5558	0.452426	0.577121	0.783937	0.433077	0.762615	Case/Ctrl	MG
K07341	3812.41	-0.0239971	0.0732438	-0.327633	0.743189	0.917168	Case/Ctrl	MG
K01451	5488.52	-0.0325177	0.0734459	-0.442743	0.657952	0.883663	Case/Ctrl	MG
K12373	25200.6	0.130989	0.101158	1.2949	0.195356	0.563094	Case/Ctrl	MG
K03271	1337.46	0.139149	0.12636	1.10121	0.270805	0.634349	Case/Ctrl	MG
K10781	549.501	-0.21027	0.157039	-1.33896	0.180582	0.545097	Case/Ctrl	MG
K05968	240.505	-0.0273821	0.270805	-0.101113	0.91946	0.977241	Case/Ctrl	MG
K09200	35.225	-0.537984	0.983199	-0.547177	0.584257	0.851921	Case/Ctrl	MG
K11906	48.1803	0.964048	0.476012	2.02526	0.0428409	0.287675	Case/Ctrl	MG
K14631	137.539	0.208172	0.28857	0.721392	0.470668	0.78789	Case/Ctrl	MG
K07348	81.3113	1.58005	0.835239	1.89173	0.0585268	0.328062	Case/Ctrl	MG
K11814	3.63753	0.376487	0.767146	0.490763	0.623594	#N/A	Case/Ctrl	MG
K08567	240.098	0.295104	0.191757	1.53895	0.123817	0.456233	Case/Ctrl	MG
K02937	12.4233	-0.683615	0.996177	-0.686239	#N/A	#N/A	Case/Ctrl	MG
K07206	533.559	-0.151066	0.22544	-0.670094	0.502798	0.805846	Case/Ctrl	MG
K16180	47.8682	-0.481833	0.230844	-2.08727	0.0368638	0.271517	Case/Ctrl	MG
K06350	1358.97	0.103791	0.111389	0.931795	0.351443	0.703512	Case/Ctrl	MG
K10815	9.75402	0.158458	0.543446	0.29158	0.770608	0.927872	Case/Ctrl	MG
K11201	229.825	1.66349	0.92017	1.8078	0.0706372	0.350169	Case/Ctrl	MG
K03760	5102.67	-0.0332946	0.15883	-0.209625	0.833961	0.953721	Case/Ctrl	MG
K09488	146.33	0.879876	0.418745	2.10122	0.0356215	0.267172	Case/Ctrl	MG
K06351	934.812	0.0642429	0.10107	0.635626	0.52502	0.818455	Case/Ctrl	MG
K11735	87.0333	1.79077	0.683772	2.61896	0.00881986	0.196607	Case/Ctrl	MG
K03610	1248.7	-0.175034	0.12497	-1.40061	0.161331	0.519408	Case/Ctrl	MG
K09811	7747.9	-0.00343761	0.0262184	-0.131115	0.895685	0.970066	Case/Ctrl	MG
K02480	1591.91	-0.00587817	0.164061	-0.0358292	0.971419	0.989797	Case/Ctrl	MG
K03832	10988.2	0.129131	0.118884	1.08619	0.277395	0.639556	Case/Ctrl	MG
K07320	176.756	0.787876	0.317623	2.48054	0.0131183	0.211351	Case/Ctrl	MG
K13529	242.078	0.156263	0.23755	0.657809	0.510661	0.810794	Case/Ctrl	MG
K07327	53.7059	-0.201345	0.867096	-0.232206	0.816378	0.947268	Case/Ctrl	MG
K00878	7170.42	-0.0830167	0.0619892	-1.33921	0.180501	0.545097	Case/Ctrl	MG
K01193	13666.4	-0.0936529	0.0707383	-1.32393	0.185525	0.550741	Case/Ctrl	MG
K08963	1572.37	0.0186663	0.0939927	0.198593	0.842581	0.958313	Case/Ctrl	MG
K05687	7.2395	1.29561	0.63692	2.03418	0.0419337	#N/A	Case/Ctrl	MG
K00609	8302.51	0.0328742	0.0220541	1.49061	0.136063	0.478567	Case/Ctrl	MG
K14127	599.401	-0.0367232	0.113462	-0.323659	0.746196	0.918592	Case/Ctrl	MG
K04727	3.98198	-0.130145	0.518491	-0.251008	0.801808	#N/A	Case/Ctrl	MG
K07123	36.4251	0.915496	0.811038	1.12879	0.258984	0.624783	Case/Ctrl	MG
K10021	98.0796	-0.0585388	0.219405	-0.266807	0.789618	0.936559	Case/Ctrl	MG
K06218	2369.84	0.107714	0.126014	0.854777	0.392675	0.732471	Case/Ctrl	MG
K11312	78.8052	-0.0903262	0.244049	-0.370115	0.711297	0.905874	Case/Ctrl	MG
K10265	167.161	0.222326	0.40976	0.542577	0.587421	0.85372	Case/Ctrl	MG
K09730	21.2295	0.555671	0.641443	0.866283	0.386335	0.729706	Case/Ctrl	MG
K15449	35.6555	0.598284	0.743038	0.805186	0.420712	0.75345	Case/Ctrl	MG
K07244	41.1883	1.07758	0.909738	1.18449	0.236218	0.601673	Case/Ctrl	MG
K02639	30.6099	-0.914081	0.507429	-1.8014	0.0716404	0.352032	Case/Ctrl	MG
K11740	525.748	-0.0531965	0.243611	-0.218367	0.827143	0.951334	Case/Ctrl	MG
K01136	503.177	-0.0623179	0.209932	-0.296847	0.766583	0.925341	Case/Ctrl	MG
K02422	1046.99	-0.315296	0.177207	-1.77926	0.0751977	0.357073	Case/Ctrl	MG
K06964	327.32	0.0319139	0.107574	0.296669	0.766719	0.925341	Case/Ctrl	MG
K14989	192.63	-0.52563	0.270589	-1.94254	0.0520715	0.312151	Case/Ctrl	MG
K11176	3574.84	0.00309529	0.0750351	0.0412512	0.967096	0.988469	Case/Ctrl	MG
K16308	93.1624	0.908916	0.585216	1.55313	0.120393	0.451236	Case/Ctrl	MG
K13650	77.1448	1.60417	0.72583	2.21011	0.0270973	0.2448	Case/Ctrl	MG
K02852	303.318	0.706322	0.200692	3.51944	0.000432464	0.0745715	Case/Ctrl	MG
K03814	1460.05	0.0397683	0.158634	0.250693	0.802052	0.941571	Case/Ctrl	MG
K03557	94.7231	0.247006	0.251502	0.982124	0.326039	0.682067	Case/Ctrl	MG
K06144	37.6794	1.60808	0.781779	2.05695	0.0396907	0.278706	Case/Ctrl	MG
K02078	8312.13	0.00349271	0.0372204	0.0938385	0.925237	0.977241	Case/Ctrl	MG
K12962	1050.7	-0.0525845	0.103566	-0.50774	0.611636	0.865084	Case/Ctrl	MG
K10852	1352.21	0.167971	0.168792	0.99514	0.319668	0.677618	Case/Ctrl	MG
K03389	1398.61	0.115278	0.102434	1.12539	0.260424	0.625208	Case/Ctrl	MG
K10641	219.649	0.0610048	0.50638	0.120472	0.904109	0.972744	Case/Ctrl	MG
K11381	1346.07	0.193394	0.168762	1.14596	0.251813	0.618107	Case/Ctrl	MG
K07009	3054.59	0.0766675	0.0891955	0.859544	0.39004	0.730797	Case/Ctrl	MG
K03335	5236.09	0.0878742	0.0998592	0.879981	0.378869	0.724281	Case/Ctrl	MG
K11071	5432.67	-0.0147472	0.0335829	-0.439129	0.660568	0.88514	Case/Ctrl	MG
K02079	122.574	-0.152948	0.512405	-0.298491	0.765328	0.924744	Case/Ctrl	MG
K12204	30.5667	0.322181	0.788673	0.40851	0.682899	0.89319	Case/Ctrl	MG
K02815	238.59	-0.0333928	0.306919	-0.1088	0.913361	0.975556	Case/Ctrl	MG
K07725	1999.9	0.240272	0.107093	2.24358	0.0248592	0.241212	Case/Ctrl	MG
K01421	21384.5	-0.0891064	0.0700692	-1.27169	0.203483	0.569592	Case/Ctrl	MG
K08239	1293.66	-0.108361	0.122963	-0.881249	0.378183	0.724281	Case/Ctrl	MG
K08306	146.279	0.766299	0.326626	2.34611	0.0189706	0.226897	Case/Ctrl	MG
K05816	77.105	1.44246	0.59942	2.40643	0.0161093	0.217991	Case/Ctrl	MG
K04656	3866.68	-0.0372478	0.0845193	-0.440702	0.659429	0.8843	Case/Ctrl	MG
K00133	9495.56	-0.00160235	0.0228204	-0.0702156	0.944022	0.98194	Case/Ctrl	MG
K02998	26.4153	0.394243	0.688716	0.572432	0.56703	0.839819	Case/Ctrl	MG
K00894	116.477	0.339411	0.281914	1.20395	0.228609	0.593747	Case/Ctrl	MG
K00024	3489.29	0.131048	0.117432	1.11595	0.264444	0.627064	Case/Ctrl	MG
K12285	586.317	-0.0213937	0.224523	-0.0952851	0.924088	0.977241	Case/Ctrl	MG
K06726	375.324	0.247322	0.159128	1.55423	0.120129	0.451036	Case/Ctrl	MG
K10960	260.844	0.508083	0.32127	1.58148	0.113767	0.441144	Case/Ctrl	MG
K02053	611.578	0.0224873	0.143443	0.156768	0.875428	0.967093	Case/Ctrl	MG
K03656	944.855	0.419088	0.163318	2.56609	0.0102852	0.203647	Case/Ctrl	MG
K00322	97.7666	1.67157	0.771501	2.16665	0.0302618	0.253179	Case/Ctrl	MG
K03635	390.366	0.018293	0.142544	0.128333	0.897886	0.970066	Case/Ctrl	MG
K14801	254.157	0.360502	0.201223	1.79156	0.0732042	0.353304	Case/Ctrl	MG
K03535	427.725	0.269076	0.230641	1.16664	0.243355	0.610348	Case/Ctrl	MG
K01546	2987.94	0.156097	0.155514	1.00375	0.315501	0.673415	Case/Ctrl	MG
K07107	5722.93	0.00943294	0.0371023	0.254242	0.799309	0.940561	Case/Ctrl	MG
K05591	1693.43	-0.0986636	0.162915	-0.605615	0.54477	0.827481	Case/Ctrl	MG
K14439	1197.98	-0.28697	0.183665	-1.56246	0.118179	0.448426	Case/Ctrl	MG
K01388	38.0485	-1.13115	0.775266	-1.45905	0.144552	0.49297	Case/Ctrl	MG
K00285	187.417	0.780728	0.264096	2.95623	0.00311426	0.139768	Case/Ctrl	MG
K10858	21.3624	-0.359513	0.826762	-0.434844	0.663676	0.886114	Case/Ctrl	MG
K09531	42.6243	0.426621	0.663215	0.643262	0.520054	0.814566	Case/Ctrl	MG
K13954	3513.17	-0.088339	0.0812015	-1.0879	0.27664	0.639262	Case/Ctrl	MG
K03238	19.9075	0.796363	0.736185	1.08174	0.279367	0.640591	Case/Ctrl	MG
K01999	9337.53	-0.0202257	0.0699021	-0.289343	0.772319	0.927923	Case/Ctrl	MG
K02115	9511.34	-0.0732409	0.0377959	-1.9378	0.0526476	0.313789	Case/Ctrl	MG
K09695	61.9091	-0.789273	0.344516	-2.29096	0.0219656	0.233606	Case/Ctrl	MG
K06298	4278.69	-0.0836188	0.0795824	-1.05072	0.293388	0.652274	Case/Ctrl	MG
K00801	152.14	0.224485	0.29807	0.753127	0.451374	0.775955	Case/Ctrl	MG
K07711	619.721	0.924945	0.248167	3.7271	0.000193693	0.0465692	Case/Ctrl	MG
K14351	560.28	0.066662	0.160172	0.416191	0.67727	0.89126	Case/Ctrl	MG
K08296	762.832	0.16929	0.265043	0.638725	0.523002	0.816968	Case/Ctrl	MG
K01685	5299.73	-0.061773	0.0675508	-0.914467	0.360472	0.710599	Case/Ctrl	MG
K03265	49.379	0.655018	0.710057	0.922486	0.356275	0.706852	Case/Ctrl	MG
K07766	14.789	-0.219297	0.725844	-0.302127	0.762555	0.923791	Case/Ctrl	MG
K03615	11651.7	-0.026662	0.0361552	-0.737433	0.460859	0.7838	Case/Ctrl	MG
K10851	6.22446	-0.153014	0.784137	-0.195137	0.845285	#N/A	Case/Ctrl	MG
K11181	557.734	-0.225141	0.143115	-1.57315	0.115684	0.444006	Case/Ctrl	MG
K02335	26683.6	0.0745824	0.0577566	1.29132	0.196592	0.564047	Case/Ctrl	MG
K13851	99.9325	-0.170155	0.376983	-0.451359	0.651731	0.882976	Case/Ctrl	MG
K14286	201.968	0.108451	0.345568	0.313834	0.753647	0.921604	Case/Ctrl	MG
K15584	1851.81	0.00735995	0.176979	0.0415866	0.966828	0.988469	Case/Ctrl	MG
K11426	83.9764	-1.90219	0.738796	-2.57472	0.0100322	0.202205	Case/Ctrl	MG
K01406	528.168	-0.461975	0.282467	-1.63551	0.101943	0.419487	Case/Ctrl	MG
K07084	191.816	-0.137347	0.209	-0.657164	0.511076	0.81107	Case/Ctrl	MG
K16148	393.638	0.0048859	0.276715	0.0176568	0.985913	0.995376	Case/Ctrl	MG
K01069	10535.8	0.0573358	0.0378475	1.51492	0.129794	0.467507	Case/Ctrl	MG
K14328	10.4183	-0.447795	0.837803	-0.534486	0.593005	0.855208	Case/Ctrl	MG
K06499	16.2143	-0.504444	0.909196	-0.554824	0.579015	0.84664	Case/Ctrl	MG
K03279	4029.76	0.0351215	0.143062	0.245498	0.806071	0.943496	Case/Ctrl	MG
K03596	14984.9	-0.00984307	0.0332237	-0.296266	0.767027	0.925472	Case/Ctrl	MG
K06477	34.4233	-1.31386	0.59374	-2.21286	0.0269073	0.2448	Case/Ctrl	MG
K03282	4473.75	0.0647574	0.0437302	1.48084	0.138649	0.483125	Case/Ctrl	MG
K07663	297.63	0.0430125	0.259617	0.165677	0.868411	0.96566	Case/Ctrl	MG
K03246	25.9414	1.50355	0.681337	2.20676	0.0273306	0.2448	Case/Ctrl	MG
K09973	1086.76	0.279389	0.153127	1.82456	0.0680672	0.345809	Case/Ctrl	MG
K12239	6.95096	1.1837	0.816411	1.44988	0.147093	#N/A	Case/Ctrl	MG
K09772	3846.06	-0.0195279	0.054696	-0.357026	0.721073	0.908332	Case/Ctrl	MG
K05001	15.4511	0.0864783	0.593346	0.145747	0.884121	0.967279	Case/Ctrl	MG
K11257	147.162	0.19979	0.474843	0.420751	0.673937	0.890742	Case/Ctrl	MG
K07051	122.014	0.970822	0.438695	2.21298	0.0268992	0.2448	Case/Ctrl	MG
K08998	2670.91	0.00296388	0.0427326	0.0693587	0.944704	0.981967	Case/Ctrl	MG
K03411	464.103	-0.327446	0.171695	-1.90714	0.0565022	0.322623	Case/Ctrl	MG
K00687	444.317	0.454453	0.259328	1.75243	0.0797006	0.365743	Case/Ctrl	MG
K13920	96.674	0.364834	0.180694	2.01907	0.0434799	0.288381	Case/Ctrl	MG
K09858	189.431	0.261419	0.2638	0.990972	0.321699	0.677723	Case/Ctrl	MG
K10927	154.949	0.238312	0.45182	0.527449	0.597882	0.85783	Case/Ctrl	MG
K13746	605.946	-0.0220229	0.15724	-0.140059	0.888613	0.968141	Case/Ctrl	MG
K03482	99.6525	1.06441	0.519984	2.047	0.0406579	0.281594	Case/Ctrl	MG
K00819	354.456	-0.193986	0.222983	-0.869962	0.384321	0.728393	Case/Ctrl	MG
K07647	632.829	0.456624	0.190787	2.39337	0.0166943	0.219675	Case/Ctrl	MG
K15363	175.297	0.356641	0.350477	1.01759	0.308874	0.66661	Case/Ctrl	MG
K01778	8248.78	-0.0585397	0.0240911	-2.42993	0.0151018	0.217991	Case/Ctrl	MG
K10041	894.422	-0.0392176	0.109895	-0.356865	0.721193	0.908332	Case/Ctrl	MG
K01363	14.4546	-0.845516	0.954985	-0.885371	0.375956	0.723045	Case/Ctrl	MG
K06184	12.7097	-0.235389	0.875392	-0.268895	0.78801	0.935378	Case/Ctrl	MG
K04337	23.6503	1.78039	0.731528	2.43379	0.0149415	0.217991	Case/Ctrl	MG
K06385	6363.38	-0.0510106	0.0811166	-0.628855	0.529444	0.821202	Case/Ctrl	MG
K03921	24.7431	-0.0478748	0.849883	-0.056331	0.955078	0.984623	Case/Ctrl	MG
K00027	10182.1	-0.0185166	0.0325951	-0.568078	0.569982	0.840367	Case/Ctrl	MG
K10231	1495.71	0.120221	0.145176	0.828106	0.40761	0.741432	Case/Ctrl	MG
K00926	4482.67	-0.0403405	0.0620453	-0.650177	0.515578	0.81285	Case/Ctrl	MG
K12242	226.599	-0.0278632	0.312919	-0.0890427	0.929048	0.977445	Case/Ctrl	MG
K12402	43.6608	0.149065	0.773122	0.19281	0.847108	0.960864	Case/Ctrl	MG
K16219	13.6479	-0.844889	0.71448	-1.18252	#N/A	#N/A	Case/Ctrl	MG
K02502	4956.13	-0.0469107	0.0595372	-0.787922	0.430742	0.761291	Case/Ctrl	MG
K16026	154.265	-0.587744	0.362515	-1.6213	0.104954	0.423868	Case/Ctrl	MG
K11936	8555.65	0.178468	0.0697117	2.56008	0.0104647	0.204859	Case/Ctrl	MG
K12920	42.0264	0.828751	0.878916	0.942924	0.34572	0.6987	Case/Ctrl	MG
K02036	7324.8	0.0195924	0.0376352	0.520588	0.602654	0.860478	Case/Ctrl	MG
K05985	2063.83	0.0274285	0.0886215	0.309501	0.75694	0.922999	Case/Ctrl	MG
K04030	298.484	-0.119876	0.197677	-0.606422	0.544234	0.827224	Case/Ctrl	MG
K12453	108.416	0.265563	0.476888	0.556867	0.577618	0.845386	Case/Ctrl	MG
K15053	18.365	-1.13609	0.905162	-1.25512	0.209436	0.573605	Case/Ctrl	MG
K00703	12226	-0.087336	0.037885	-2.30529	0.0211501	0.231267	Case/Ctrl	MG
K14215	244.958	0.118936	0.398584	0.298397	0.7654	0.924744	Case/Ctrl	MG
K02086	8516.85	0.0350052	0.0665903	0.52568	0.599111	0.858313	Case/Ctrl	MG
K05851	173.828	1.59722	0.699959	2.28188	0.0224966	0.235712	Case/Ctrl	MG
K07143	707.234	-0.0877474	0.176374	-0.497509	0.61883	0.868322	Case/Ctrl	MG
K01198	20563.1	-0.0450792	0.101958	-0.442136	0.658391	0.883806	Case/Ctrl	MG
K02619	1259.3	-0.0302853	0.138886	-0.218058	0.827384	0.951334	Case/Ctrl	MG
K07389	28.4204	1.16968	0.934074	1.25224	0.210483	0.574904	Case/Ctrl	MG
K04058	22.3403	-0.0625059	0.411088	-0.15205	0.879147	0.967279	Case/Ctrl	MG
K13929	251.561	0.109046	0.283047	0.385256	0.700048	0.900577	Case/Ctrl	MG
K10130	746.237	0.0878405	0.385998	0.227567	0.819983	0.948953	Case/Ctrl	MG
K01705	44.4023	-0.34149	0.432061	-0.790376	0.429308	0.760353	Case/Ctrl	MG
K08737	1260.08	-0.1371	0.200741	-0.682969	0.494626	0.800824	Case/Ctrl	MG
K07046	179.696	0.0786069	0.227291	0.345842	0.729461	0.911604	Case/Ctrl	MG
K01911	1558.92	-0.231895	0.134983	-1.71795	0.0858062	0.382801	Case/Ctrl	MG
K13888	997.237	-0.137085	0.134879	-1.01636	0.309459	0.66726	Case/Ctrl	MG
K10192	2493.77	-0.102474	0.140809	-0.727756	0.466763	0.78701	Case/Ctrl	MG
K07334	1441.33	0.0209714	0.102498	0.204603	0.837882	0.954905	Case/Ctrl	MG
K06906	452.872	0.269493	0.179002	1.50553	0.132187	0.47201	Case/Ctrl	MG
K11537	1121.97	0.700611	0.182356	3.842	0.000122037	0.0373435	Case/Ctrl	MG
K06610	233.784	0.213668	0.238592	0.895538	0.3705	0.719937	Case/Ctrl	MG
K02784	391.584	0.143239	0.150637	0.950885	0.341663	0.69342	Case/Ctrl	MG
K01125	6107.07	0.017173	0.113143	0.151781	0.87936	0.967279	Case/Ctrl	MG
K10682	92.7494	0.0589429	0.253403	0.232605	0.816068	0.947201	Case/Ctrl	MG
K10206	8033.54	-0.0416942	0.0382426	-1.09026	0.2756	0.638891	Case/Ctrl	MG
K16011	1927.76	-0.0818166	0.106594	-0.767551	0.442754	0.77068	Case/Ctrl	MG
K03879	5.83047	-0.139817	0.674867	-0.207177	0.835872	#N/A	Case/Ctrl	MG
K07199	47.8383	-0.389044	0.607375	-0.640534	0.521826	0.816222	Case/Ctrl	MG
K02062	66.6828	0.433634	0.562428	0.771004	0.440705	0.76908	Case/Ctrl	MG
K02825	1025.34	0.0566812	0.15499	0.365709	0.714582	0.906446	Case/Ctrl	MG
K13381	142.962	1.65116	0.686957	2.40358	0.0162352	0.217991	Case/Ctrl	MG
K03759	204.455	0.788944	0.385048	2.04895	0.0404668	0.281397	Case/Ctrl	MG
K03499	17427.2	-0.00823123	0.020384	-0.403808	0.686354	0.894762	Case/Ctrl	MG
K00602	4681.1	0.106333	0.0793078	1.34077	0.179996	0.545097	Case/Ctrl	MG
K03089	323.943	0.347134	0.23552	1.4739	0.140508	0.485823	Case/Ctrl	MG
K06896	13609.7	0.153976	0.0759457	2.02745	0.0426165	0.287469	Case/Ctrl	MG
K01697	1267.84	0.0340755	0.150743	0.22605	0.821162	0.949759	Case/Ctrl	MG
K00045	251.356	0.335548	0.425112	0.789317	0.429927	0.760816	Case/Ctrl	MG
K01156	7708.42	-0.0551816	0.0923651	-0.597429	0.550221	0.831445	Case/Ctrl	MG
K03082	3778.9	0.0364281	0.0667591	0.545665	0.585296	0.852491	Case/Ctrl	MG
K07089	3452	0.101474	0.0647522	1.56712	0.117087	0.447599	Case/Ctrl	MG
K00010	14986.7	0.187048	0.0761369	2.45673	0.0140208	0.216009	Case/Ctrl	MG
K12506	5207.85	-0.0487683	0.0420261	-1.16043	0.245874	0.613129	Case/Ctrl	MG
K01667	1893.37	0.432309	0.157798	2.73964	0.00615058	0.184847	Case/Ctrl	MG
K03060	2510.09	0.0464352	0.0441167	1.05255	0.292546	0.651694	Case/Ctrl	MG
K05738	65.8546	0.136344	0.619178	0.220201	0.825715	0.950752	Case/Ctrl	MG
K01900	134.628	0.935949	0.39234	2.38555	0.0170534	0.221201	Case/Ctrl	MG
K12350	13.1992	1.38823	0.84464	1.64357	0.100264	0.415556	Case/Ctrl	MG
K14051	18074	-0.106384	0.0937002	-1.13536	0.256223	0.622481	Case/Ctrl	MG
K15599	1216.37	0.0363452	0.102875	0.353297	0.723866	0.909805	Case/Ctrl	MG
K07705	7156.91	-0.0888599	0.100463	-0.884503	0.376425	0.723406	Case/Ctrl	MG
K03219	31.595	-0.334442	0.387277	-0.863573	0.387823	0.729706	Case/Ctrl	MG
K05604	16.665	-0.523009	0.718403	-0.728017	0.466603	0.78701	Case/Ctrl	MG
K05127	29.5147	-0.727624	0.639273	-1.13821	0.255034	0.621498	Case/Ctrl	MG
K07694	1801.41	-0.0314822	0.106076	-0.296789	0.766628	0.925341	Case/Ctrl	MG
K07289	5796.89	0.18687	0.146551	1.27511	0.202269	0.56912	Case/Ctrl	MG
K03184	171.364	1.62211	0.865121	1.87501	0.0607907	0.331247	Case/Ctrl	MG
K10212	752.525	0.00309761	0.196381	0.0157735	0.987415	0.995555	Case/Ctrl	MG
K07761	4.64901	0.221113	0.872373	0.253462	0.799911	#N/A	Case/Ctrl	MG
K00343	2585.01	0.134114	0.127532	1.05161	0.292979	0.651795	Case/Ctrl	MG
K02594	428.943	0.0498665	0.282096	0.176771	0.859688	0.963101	Case/Ctrl	MG
K00947	3776.06	0.0364051	0.0906003	0.401821	0.687816	0.894762	Case/Ctrl	MG
K16147	752.302	-0.00313708	0.328742	-0.00954269	0.992386	0.996863	Case/Ctrl	MG
K02897	2919.37	-0.0159992	0.0940481	-0.170118	0.864918	0.96566	Case/Ctrl	MG
K12987	404.389	0.0234448	0.178618	0.131257	0.895572	0.970066	Case/Ctrl	MG
K15051	3115.28	-0.0791088	0.107812	-0.733765	0.463092	0.784588	Case/Ctrl	MG
K01790	5914.2	-0.128205	0.0667025	-1.92204	0.0546013	0.319076	Case/Ctrl	MG
K03778	4507.5	0.184701	0.0531091	3.47776	0.000505622	0.0745715	Case/Ctrl	MG
K06203	132.836	0.269505	0.313921	0.858511	0.390611	0.731366	Case/Ctrl	MG
K02121	6048.11	0.028219	0.0626134	0.450686	0.652216	0.88306	Case/Ctrl	MG
K12992	1855.64	-0.165516	0.125244	-1.32155	0.186319	0.550774	Case/Ctrl	MG
K15581	5242.12	-0.0650762	0.0822133	-0.791553	0.428622	0.759537	Case/Ctrl	MG
K01601	119.301	0.420949	0.426631	0.986682	0.323798	0.679996	Case/Ctrl	MG
K02910	18.1803	0.710012	0.657415	1.08001	0.28014	0.640591	Case/Ctrl	MG
K06149	3188.33	0.154123	0.117182	1.31525	0.188428	0.55417	Case/Ctrl	MG
K05925	3002.96	0.16352	0.110912	1.47432	0.140394	0.485823	Case/Ctrl	MG
K01924	12911.9	0.00739538	0.0200343	0.369135	0.712027	0.906139	Case/Ctrl	MG
K02128	26.4813	-0.0532125	0.547188	-0.0972471	0.92253	0.977241	Case/Ctrl	MG
K13979	108.407	1.63024	0.51646	3.15656	0.00159642	0.11928	Case/Ctrl	MG
K14546	125.793	0.91869	0.565906	1.6234	0.104504	0.423868	Case/Ctrl	MG
K12058	146.576	1.2917	0.496745	2.60032	0.00931369	0.198308	Case/Ctrl	MG
K02230	4882.82	-0.152169	0.134552	-1.13093	0.258087	0.62354	Case/Ctrl	MG
K16044	1240.12	0.384607	0.1442	2.66718	0.00764912	0.188766	Case/Ctrl	MG
K01627	1835.42	0.0853615	0.118849	0.718232	0.472614	0.788853	Case/Ctrl	MG
K13841	41.9142	0.519872	0.917269	0.56676	0.570877	0.841135	Case/Ctrl	MG
K02612	1299.08	0.117631	0.114149	1.0305	0.302775	0.660944	Case/Ctrl	MG
K08227	134.535	0.619835	0.293856	2.10932	0.0349172	0.266966	Case/Ctrl	MG
K15519	888.407	-0.312978	0.251117	-1.24634	0.212639	0.577446	Case/Ctrl	MG
K01113	1853.83	0.29078	0.146372	1.98659	0.046968	0.296355	Case/Ctrl	MG
K03273	1170.82	0.208298	0.168128	1.23892	0.215375	0.580426	Case/Ctrl	MG
K15069	87.0045	-0.0707772	0.401014	-0.176496	0.859905	0.963101	Case/Ctrl	MG
K03294	9015.84	0.0690384	0.0793522	0.870025	0.384287	0.728393	Case/Ctrl	MG
K03050	553.91	-0.00564479	0.155866	-0.0362156	0.97111	0.989797	Case/Ctrl	MG
K01878	277.54	0.180721	0.188371	0.959391	0.337362	0.689891	Case/Ctrl	MG
K05845	735.374	0.232754	0.161647	1.43989	0.149898	0.50355	Case/Ctrl	MG
K15873	192.138	0.0364942	0.220521	0.16549	0.868558	0.96566	Case/Ctrl	MG
K03047	28.7263	1.00209	0.813907	1.23121	0.218246	0.583491	Case/Ctrl	MG
K13192	85.5359	0.648517	0.750515	0.864096	0.387535	0.729706	Case/Ctrl	MG
K13255	61.7449	1.61043	0.789675	2.03936	0.0414144	0.284782	Case/Ctrl	MG
K01676	3351.21	0.109235	0.121355	0.900134	0.368049	0.718801	Case/Ctrl	MG
K12954	18.2148	0.532078	0.474844	1.12053	0.262487	0.625343	Case/Ctrl	MG
K01365	1342.43	-0.310971	0.245025	-1.26914	0.204391	0.570464	Case/Ctrl	MG
K00257	3569.2	0.0517608	0.104911	0.493378	0.621746	0.868322	Case/Ctrl	MG
K01060	2485.68	-0.227558	0.158101	-1.43932	0.15006	0.503841	Case/Ctrl	MG
K09021	131.004	0.876346	0.470825	1.8613	0.062702	0.333525	Case/Ctrl	MG
K02839	111.572	0.541621	0.278607	1.94403	0.0518916	0.311906	Case/Ctrl	MG
K12149	65.2357	1.79921	0.824392	2.18246	0.0290752	0.247765	Case/Ctrl	MG
K00771	1096.84	0.0174812	0.169846	0.102924	0.918023	0.976633	Case/Ctrl	MG
K14122	17.8547	0.994607	0.820661	1.21196	0.225528	0.59143	Case/Ctrl	MG
K12952	7681.59	0.0968289	0.0632914	1.52989	0.126044	0.460406	Case/Ctrl	MG
K08652	102.278	-0.558511	0.333938	-1.6725	0.0944256	0.403859	Case/Ctrl	MG
K10697	51.2139	-0.613159	0.33742	-1.8172	0.0691871	0.348379	Case/Ctrl	MG
K01975	425.325	0.218404	0.196644	1.11065	0.266717	0.629131	Case/Ctrl	MG
K06460	78.3018	-0.190131	0.498403	-0.38148	0.702847	0.902249	Case/Ctrl	MG
K01479	156.673	0.0315303	0.287271	0.109758	0.912601	0.975547	Case/Ctrl	MG
K11549	20.8373	-0.507563	0.857087	-0.592195	0.55372	0.833552	Case/Ctrl	MG
K07231	205.95	0.235331	0.2602	0.904423	0.365771	0.715597	Case/Ctrl	MG
K02424	1671.86	-0.0921379	0.107043	-0.860753	0.389374	0.730362	Case/Ctrl	MG
K00239	8104.71	0.00292974	0.0927747	0.0315791	0.974808	0.99077	Case/Ctrl	MG
K11903	76.2414	1.08705	0.523368	2.07702	0.0377994	0.273562	Case/Ctrl	MG
K14588	105.477	1.81101	0.826486	2.19122	0.0284359	0.247087	Case/Ctrl	MG
K00038	377.187	0.391658	0.169833	2.30613	0.0211032	0.231267	Case/Ctrl	MG
K02453	769.421	0.654124	0.306272	2.13576	0.0326987	0.260244	Case/Ctrl	MG
K01703	7692.58	-0.049938	0.0502242	-0.994302	0.320076	0.677618	Case/Ctrl	MG
K12517	31.3874	-0.333857	0.898824	-0.371438	0.710312	0.905647	Case/Ctrl	MG
K04063	71.7238	0.785396	0.358001	2.19384	0.0282473	0.247087	Case/Ctrl	MG
K06425	43.0661	0.18853	0.663279	0.28424	0.776227	0.929318	Case/Ctrl	MG
K07739	1525.87	-0.0164295	0.163585	-0.100434	0.92	0.977241	Case/Ctrl	MG
K02962	16.9348	0.357724	0.641085	0.557997	0.576846	0.844954	Case/Ctrl	MG
K04114	18927.4	-0.0655661	0.0581655	-1.12723	0.259644	0.624783	Case/Ctrl	MG
K06605	290.943	-0.248119	0.194987	-1.27249	0.203198	0.569592	Case/Ctrl	MG
K07132	2333.39	0.0739051	0.144426	0.511717	0.608849	0.865084	Case/Ctrl	MG
K11706	17.9509	1.49497	0.598085	2.4996	0.0124334	0.211351	Case/Ctrl	MG
K00208	1908.23	0.0538661	0.131992	0.408102	0.683199	0.893195	Case/Ctrl	MG
K11494	440.244	0.0328728	0.260915	0.125991	0.899739	0.971147	Case/Ctrl	MG
K00796	4204.61	-0.0237712	0.0577122	-0.411892	0.680419	0.892581	Case/Ctrl	MG
K02827	131.292	-0.392347	0.450739	-0.870453	0.384053	0.728393	Case/Ctrl	MG
K02915	16.6078	0.538138	0.670278	0.802858	0.422057	0.753857	Case/Ctrl	MG
K12267	2316.89	0.332028	0.106935	3.10495	0.00190313	0.122018	Case/Ctrl	MG
K03831	985.141	-0.137131	0.124742	-1.09932	0.27163	0.634609	Case/Ctrl	MG
K07112	2023.44	-0.00970427	0.10992	-0.0882846	0.92965	0.977445	Case/Ctrl	MG
K02566	3086.61	0.0634085	0.104784	0.605136	0.545089	0.827591	Case/Ctrl	MG
K16182	11.2485	0.305802	0.499162	0.61263	0.540121	0.82611	Case/Ctrl	MG
K00620	7502.74	-0.0361706	0.0514826	-0.702579	0.482318	0.794851	Case/Ctrl	MG
K07473	8020.74	0.0575914	0.0682197	0.844205	0.398555	0.735578	Case/Ctrl	MG
K02526	1089.21	-0.0797075	0.128743	-0.61912	0.535837	0.824328	Case/Ctrl	MG
K01582	11698.1	-0.106923	0.0801026	-1.33482	0.181935	0.545319	Case/Ctrl	MG
K02250	109.819	0.513358	0.429711	1.19466	0.23222	0.597455	Case/Ctrl	MG
K13025	23.3957	-0.959326	0.862557	-1.11219	0.266057	0.628641	Case/Ctrl	MG
K08466	103.893	0.85945	0.477592	1.79955	0.0719321	0.352192	Case/Ctrl	MG
K04023	772.345	0.285072	0.134763	2.11535	0.0343998	0.26649	Case/Ctrl	MG
K02919	1721.15	0.0959034	0.071756	1.33652	0.181379	0.545097	Case/Ctrl	MG
K01785	12370.4	0.0988511	0.0523386	1.88868	0.0589343	0.329248	Case/Ctrl	MG
K00651	7014.62	-0.0349813	0.0361266	-0.968297	0.332896	0.688073	Case/Ctrl	MG
K01919	1275.34	0.197972	0.146966	1.34706	0.177962	0.54387	Case/Ctrl	MG
K15555	78.45	0.791563	0.436699	1.81261	0.0698924	0.349387	Case/Ctrl	MG
K03838	78.8855	1.8609	0.771004	2.4136	0.0157956	0.217991	Case/Ctrl	MG
K06546	142.507	0.0499912	0.410358	0.121823	0.903039	0.97237	Case/Ctrl	MG
K14307	199.778	-0.444742	0.32484	-1.36911	0.170965	0.534848	Case/Ctrl	MG
K13584	49.4837	0.320804	0.523456	0.612857	0.539971	0.82611	Case/Ctrl	MG
K01933	8479.42	-0.00648882	0.0237247	-0.273505	0.784465	0.932713	Case/Ctrl	MG
K03630	8404.43	0.00577783	0.0366675	0.157573	0.874793	0.967093	Case/Ctrl	MG
K11692	158.937	-0.316401	0.185069	-1.70964	0.0873328	0.385612	Case/Ctrl	MG
K00955	1512.51	0.283115	0.157365	1.7991	0.0720028	0.352192	Case/Ctrl	MG
K02217	8043.13	0.0409356	0.0431541	0.948592	0.342828	0.694755	Case/Ctrl	MG
K01036	25.5126	-0.858199	0.661877	-1.29661	0.194764	0.562655	Case/Ctrl	MG
K09001	876.877	0.342895	0.164446	2.08515	0.0370554	0.272036	Case/Ctrl	MG
K15287	5.79122	-0.18935	0.902086	-0.209902	0.833744	#N/A	Case/Ctrl	MG
K00523	196.725	0.0655482	0.187255	0.350048	0.726303	0.91096	Case/Ctrl	MG
K02417	1181.42	-0.295369	0.172376	-1.71352	0.086617	0.384118	Case/Ctrl	MG
K14597	53.5719	-0.485129	0.390629	-1.24192	0.214267	0.579761	Case/Ctrl	MG
K11626	2366.49	-0.0819127	0.129389	-0.633075	0.526685	0.819234	Case/Ctrl	MG
K15525	1426.79	-0.14698	0.154021	-0.954282	0.339941	0.692045	Case/Ctrl	MG
K03194	92.5092	-0.143075	0.444592	-0.321813	0.747595	0.918592	Case/Ctrl	MG
K03455	14496.4	0.066532	0.0560864	1.18624	0.235527	0.600983	Case/Ctrl	MG
K06267	258.82	0.0428992	0.343945	0.124727	0.90074	0.971392	Case/Ctrl	MG
K03108	284.51	0.357261	0.243898	1.4648	0.142976	0.490329	Case/Ctrl	MG
K05613	578.691	-0.418758	0.153805	-2.72266	0.00647589	0.187869	Case/Ctrl	MG
K02840	2161.11	0.0914822	0.121799	0.751092	0.452597	0.776474	Case/Ctrl	MG
K11063	10007.4	-0.0997184	0.113146	-0.881326	0.378141	0.724281	Case/Ctrl	MG
K05934	1727.73	0.03151	0.113345	0.278	0.781012	0.930744	Case/Ctrl	MG
K13727	36.7833	-0.316105	0.791347	-0.399452	0.68956	0.895655	Case/Ctrl	MG
K08070	1958.43	-0.0538013	0.10588	-0.508133	0.61136	0.865084	Case/Ctrl	MG
K10014	82.737	1.50815	0.6981	2.16037	0.0307442	0.253179	Case/Ctrl	MG
K04094	5465.19	-0.043414	0.0971319	-0.446959	0.654904	0.883663	Case/Ctrl	MG
K08602	10648.1	0.0162532	0.0854987	0.190098	0.849232	0.961234	Case/Ctrl	MG
K03932	3299.99	-0.0830253	0.0952118	-0.872007	0.383205	0.72741	Case/Ctrl	MG
K15924	404.543	-0.25313	0.282447	-0.896204	0.370144	0.719937	Case/Ctrl	MG
K07589	28.3368	1.80249	0.790014	2.28159	0.0225138	0.235712	Case/Ctrl	MG
K03304	138.126	0.234704	0.323975	0.724452	0.468788	0.78701	Case/Ctrl	MG
K11291	547.072	-0.220466	0.233999	-0.942168	0.346107	0.698731	Case/Ctrl	MG
K11940	28.5251	1.64627	0.660524	2.49238	0.0126892	0.211351	Case/Ctrl	MG
K07687	1227.6	-0.0866653	0.225988	-0.383495	0.701353	0.901395	Case/Ctrl	MG
K00201	41.8444	0.974482	0.829235	1.17516	0.239932	0.605949	Case/Ctrl	MG
K03575	7558.89	-0.049091	0.0407872	-1.20359	0.228748	0.593881	Case/Ctrl	MG
K07238	1848.86	0.062508	0.109197	0.572432	0.567029	0.839819	Case/Ctrl	MG
K16306	115.629	0.237497	0.257554	0.922128	0.356462	0.706852	Case/Ctrl	MG
K02854	3470.11	0.0662927	0.0805107	0.823402	0.410279	0.743673	Case/Ctrl	MG
K14437	411.346	-0.663753	0.40266	-1.64842	0.0992665	0.414276	Case/Ctrl	MG
K02283	7340.28	-0.128577	0.079027	-1.627	0.103737	0.423062	Case/Ctrl	MG
K01443	8751.5	-0.0124892	0.0632279	-0.197527	0.843415	0.95859	Case/Ctrl	MG
K16137	16078.7	0.0256362	0.0466764	0.549234	0.582845	0.850946	Case/Ctrl	MG
K00591	101.164	0.223516	0.267825	0.834561	0.403965	0.739194	Case/Ctrl	MG
K09820	102.307	0.737898	0.323988	2.27755	0.0227535	0.237116	Case/Ctrl	MG
K02701	27.3127	-0.92323	0.634928	-1.45407	0.145927	0.49565	Case/Ctrl	MG
K03068	62.3331	-0.708686	0.939176	-0.754583	0.450499	0.775047	Case/Ctrl	MG
K07271	8394.57	0.0639799	0.0801867	0.797886	0.424937	0.755895	Case/Ctrl	MG
K00627	2972.66	0.189723	0.183847	1.03196	0.30209	0.660811	Case/Ctrl	MG
K10807	247.808	0.113402	0.355564	0.318935	0.749776	0.919333	Case/Ctrl	MG
K02771	339.066	-0.0644549	0.190754	-0.337896	0.735442	0.914053	Case/Ctrl	MG
K03769	2481.94	0.282239	0.0918306	3.07347	0.00211584	0.129761	Case/Ctrl	MG
K13481	10.132	-1.09916	0.644831	-1.70458	0.0882732	0.388656	Case/Ctrl	MG
K15296	410.318	0.405893	0.397347	1.02151	0.307015	0.664787	Case/Ctrl	MG
K05108	190.309	-0.47782	0.34938	-1.36762	0.17143	0.535582	Case/Ctrl	MG
K02849	219.173	0.672618	0.331044	2.03181	0.042173	0.287469	Case/Ctrl	MG
K06131	23495.3	-0.120138	0.0520106	-2.30988	0.020895	0.231267	Case/Ctrl	MG
K02949	18.2542	0.060998	0.697454	0.0874582	0.930307	0.977803	Case/Ctrl	MG
K10561	353.43	0.00414312	0.168741	0.0245532	0.980411	0.994075	Case/Ctrl	MG
K03581	20121.4	0.0226704	0.0398738	0.568553	0.569659	0.840367	Case/Ctrl	MG
K00299	6508.48	-0.00917615	0.0801148	-0.114537	0.908812	0.974068	Case/Ctrl	MG
K06076	9329.69	0.00681599	0.127514	0.0534528	0.957371	0.985059	Case/Ctrl	MG
K08317	94.9188	1.49676	0.5862	2.55333	0.0106699	0.205816	Case/Ctrl	MG
K04083	5608.67	0.0160115	0.0482289	0.331989	0.739898	0.915792	Case/Ctrl	MG
K08010	16.5293	0.0709551	0.686859	0.103304	0.917722	0.976606	Case/Ctrl	MG
K03665	10849.7	0.01593	0.0284466	0.559996	0.575482	0.844954	Case/Ctrl	MG
K06981	25.1849	0.946259	0.862069	1.09766	0.272353	0.634609	Case/Ctrl	MG
K00169	1190.7	0.0298654	0.126301	0.236461	0.813075	0.946061	Case/Ctrl	MG
[truncated: 50,639 more rows]

## Sheet: STable8
Supplementary Table 8. Differential abundance of functionally classified (KOs) MP spectra.
[truncated: 3,570 more rows]

[truncated: 12 more sheets: STable9, STable10, STable11, STable12, STable13, STable14, STable15, STable16, STable17, STable18, STable19, STable20]
